# Supplementary material for: Closing the Gap Between Therapeutic Use and Mode of Action in Remedial Herbs
Source: Front Pharmacol. 2019 Oct 3;10:1132. doi: 10.3389/fphar.2019.01132 (PMC6785637; doi:10.3389/fphar.2019.01132)
Supplement: Supplementary Table 1 — Collected data connecting diseases and plants, plants and metabolites, metabolites and proteins, and proteins and diseases. Also provided are the different subsets used to construct the plant-disease and plant-protein networks of Figures 2 and 4, respectively. [file Table_1.xlsx]

## Sheet: DB plants-diseases
Plant	Therapeutic_Use
Herniaria glabra	jaundice
Herniaria glabra	diuretic
Tilia tomentosa	catarrh
Tilia tomentosa	anxiety
Tilia tomentosa	rheumatism
Tilia tomentosa	hypercholesterolemia
Tilia tomentosa	sedative
Tilia tomentosa	embolism prevention
Tilia tomentosa	fever
Tilia tomentosa	hypertension
Tilia tomentosa	toothache
Tilia tomentosa	vasodilator
Vitis vinifera	circulatory
Vitis vinifera	psoriasis
Vitis vinifera	atherosclerosis
Vitis vinifera	cancer
Vitis vinifera	rheumatism
Vitis vinifera	hypercholesterolemia
Vitis vinifera	arthritis
Vitis vinifera	diarrhea
Vitis vinifera	ischemic heart disease
Vitis vinifera	osteoarthritis
Vitis vinifera	cardioprotector
Vitis vinifera	hypertension
Vitis vinifera	neoplasia
Vitis vinifera	sedative
Vitis vinifera	hyperglycemia
Vitis vinifera	diabetes
Vitis vinifera	reduce arterial inflamation
Vitis vinifera	vasodilator
Prunella vulgaris	haemorrhoids
Prunella vulgaris	bruises
Prunella vulgaris	diarrhea
Prunella vulgaris	antiseptic
Prunella vulgaris	hypertension
Cucurbita maxima	antiseptic
Cucurbita maxima	antiinflammatory
Cirsium arvense	vasotonic
Calluna vulgaris	diarrhea
Adiantum capillus-veneris	catarrh
Adiantum capillus-veneris	cough
Pulmonaria officinalis	catarrh
Pulmonaria officinalis	fever
Pulmonaria officinalis	bronchitis
Pulmonaria officinalis	pharyngitis
Pulmonaria officinalis	diarrhea
Pulmonaria officinalis	urethritis
Pulmonaria officinalis	emphysema
Pulmonaria officinalis	cystitis
Pulmonaria officinalis	gingivitis
Pulmonaria officinalis	cough
Vinca minor	lupus
Vinca minor	increase blood flow
Vinca minor	loss memory prevention
Vinca minor	hypertension
Vinca minor	gingivitis
Vinca minor	neurodegenerative diseases
Vinca minor	parkinson's disease
Vinca minor	alzheimer's disease
Vinca minor	vasodilator
Equisetum ramosissimum	gout
Equisetum ramosissimum	antihemorrhagic
Equisetum ramosissimum	kidney stone
Equisetum ramosissimum	gingivitis
Equisetum ramosissimum	tuberculosis
Equisetum ramosissimum	obesity
Equisetum ramosissimum	neoplasia
Equisetum ramosissimum	osteoporosis
Sempervivum tectorum	herpes
Eleuterococus senticosus	dystonia
Eleuterococus senticosus	hypercholesterolemia
Eleuterococus senticosus	allergy
Aesculus hippocastanum	against vascular disorders
Aesculus hippocastanum	against couperose
Aesculus hippocastanum	vasoprotector
Aesculus hippocastanum	haemorrhoids
Aesculus hippocastanum	venotonic
Aesculus hippocastanum	treat cardiovascular diseases
Aesculus hippocastanum	stimulate peripheral circulation
Botrychium lunaria	ophthalmic antiseptic
Peumus boldus	gallstones
Peumus boldus	gout
Peumus boldus	gonorrhea
Peumus boldus	syphilis
Ribes petraeum	burns
Centaurea scabiosa	hyperglycemia
Quercus cerrioides	leukorrhea
Quercus cerrioides	gastroenteritis
Quercus cerrioides	antihemorrhagic
Quercus cerrioides	diarrhea
Quercus cerrioides	gingivitis
Quercus cerrioides	gonorrhea
Quercus cerrioides	cough
Lonicera caerulea	cough
Lonicera caerulea	asthma
Lonicera caerulea	gingivitis
Rhamnus alaternus	hypertension
Verbascum pulvurentum	cough
Verbascum pulvurentum	bronchitis
Verbascum pulvurentum	otalgia
Verbascum pulvurentum	diarrhea
Verbascum pulvurentum	rhinitis
Verbascum pulvurentum	burns
Rubus ulmifolius	hypercholesterolemia
Rubus ulmifolius	diarrhea
Rubus ulmifolius	herpes
Rubus ulmifolius	vulnerary
Melia azederach	psoriasis
Melia azederach	gout
Melia azederach	antihelmintic
Melia azederach	malaria
Melia azederach	cancer
Melia azederach	antithrombotic
Melia azederach	measles
Melia azederach	hypercholesterolemia
Melia azederach	arthritis
Melia azederach	bronchopulmonar diseases
Melia azederach	candidiasis
Melia azederach	sinusitis
Melia azederach	haemorrhoids
Melia azederach	peptic ulcer
Melia azederach	bronchitis
Melia azederach	gonorrhea
Melia azederach	syphilis
Melia azederach	hypertension
Melia azederach	tuberculosis
Melia azederach	diabetes type ii
Spartium junceum	analgesic
Spartium junceum	cardiotonic
Spartium junceum	antiinflammatory
Aconitum napellus	hypotension
Aconitum napellus	asthma
Aconitum napellus	cough
Aconitum napellus	neuralgia
Myrtus communis	sinusitis
Myrtus communis	pharyngitis
Myrtus communis	cough
Myrtus communis	asthma
Myrtus communis	laryngitis
Salvia pratensis	vertigo
Agrimonia eupatoria	bronchitis
Agrimonia eupatoria	skin ulcer
Agrimonia eupatoria	pharyngitis
Agrimonia eupatoria	diarrhea
Agrimonia eupatoria	conjunctivitis
Agrimonia eupatoria	pneumonia
Agrimonia eupatoria	cystitis
Agrimonia eupatoria	aphonia
Agrimonia eupatoria	hypertension
Agrimonia eupatoria	urinary incontinence
Sanicula europaea	catarrh
Sanicula europaea	cough
Sanicula europaea	gingivitis
Sanicula europaea	burns
Sanicula europaea	laryngitis
Sanicula europaea	tonsillitis
Cynara scolymus	hyperlipidemia
Cynara scolymus	gout
Cynara scolymus	hyperglycemia
Cynara scolymus	migraine
Calicotome spinosa	catarrh
Datura stramonium	catarrh
Datura stramonium	asthma
Datura stramonium	rheumatism
Datura stramonium	sedative
Datura stramonium	analgesic
Datura stramonium	toothache
Olea europaea	cardioprotector
Olea europaea	peptic ulcer
Olea europaea	gallstones
Olea europaea	hypercholesterolemia
Olea europaea	atherosclerosis
Olea europaea	myalgia
Olea europaea	otalgia
Olea europaea	fever
Olea europaea	hypertension
Olea europaea	angina
Olea europaea	hyperglycemia
Olea europaea	antiseptic
Olea europaea	vasodilator
Rubus idaeus	gallstones
Rubus idaeus	rheumatism
Rubus idaeus	hypercholesterolemia
Rubus idaeus	cough
Rubus idaeus	fever
Asparagus officinalis	colon cancer prevention
Asparagus officinalis	kidney stone
Asparagus officinalis	hypertension
Asparagus officinalis	cardiovascular disease prevention
Asparagus officinalis	hypercholesterolemia
Asparagus officinalis	urolithiasis
Rheum palmatum	circulatory
Rheum palmatum	stomatitis
Rheum palmatum	gingivitis
Linum narbonense	catarrh
Linum narbonense	psoriasis
Linum narbonense	fever
Linum narbonense	migraine
Linum narbonense	pharyngitis
Linum narbonense	toothache
Linum narbonense	cough
Smilax aspera	gout
Smilax aspera	bruises
Smilax aspera	arthritis
Smilax aspera	urethritis
Smilax aspera	cystitis
Smilax aspera	kidney stone
Smilax aspera	hypertension
Smilax aspera	nephritis
Smilax aspera	diuretic
Taxus baccata	cough
Origanum virens	analgesic
Origanum virens	pharyngitis
Origanum virens	asthma
Origanum virens	sedative
Sisymbrium officinale	catarrh
Sisymbrium officinale	pharyngitis
Sisymbrium officinale	cough
Sisymbrium officinale	laryngitis
Citrus sinensis	circulatory
Citrus sinensis	anxiety
Citrus sinensis	bronchitis
Citrus sinensis	hypercholesterolemia
Citrus sinensis	sedative
Citrus sinensis	vasoprotector
Citrus sinensis	haemorrhoids
Citrus sinensis	fever
Citrus sinensis	cardioprotector
Citrus sinensis	neurodegenerative diseases
Citrus sinensis	cough
Citrus sinensis	arthritis
Tilia cordata	catarrh
Tilia cordata	anxiety
Tilia cordata	rheumatism
Tilia cordata	hypercholesterolemia
Tilia cordata	sedative
Tilia cordata	embolism prevention
Tilia cordata	fever
Tilia cordata	hypertension
Tilia cordata	toothache
Tilia cordata	vasodilator
Lonicera periclymenum	cardiotonic
Lonicera periclymenum	cough
Lonicera periclymenum	asthma
Lonicera periclymenum	gingivitis
Apium graveolens	gout
Apium graveolens	regulate blood pressure
Apium graveolens	asthma
Apium graveolens	bronchitis
Apium graveolens	arthritis
Apium graveolens	diarrhea
Apium graveolens	urethritis
Apium graveolens	cystitis
Satureja grandiflora	diarrhea
Ramonda myconi	catarrh
Ramonda myconi	diarrhea
Pulmonaria longifolia	catarrh
Pulmonaria longifolia	fever
Pulmonaria longifolia	bronchitis
Pulmonaria longifolia	pharyngitis
Pulmonaria longifolia	diarrhea
Pulmonaria longifolia	urethritis
Pulmonaria longifolia	emphysema
Pulmonaria longifolia	pneumonia
Pulmonaria longifolia	cystitis
Pulmonaria longifolia	gingivitis
Pulmonaria longifolia	cough
Panax ginseng	cardiovascular regulator
Panax ginseng	diarrhea
Panax ginseng	hyperlipidemia
Panax ginseng	asthma
Panax ginseng	hyperglycemia
Panax ginseng	depression
Panax ginseng	vasodilator
Melilotus alba	gout
Melilotus alba	sedative
Melilotus alba	vasoprotector
Melilotus alba	kidney stone
Melilotus alba	venotonic
Melilotus alba	cough
Hieracium pilosella	pharyngitis
Mentha longifolia	catarrh
Mentha longifolia	gout
Mentha longifolia	burns
Mentha longifolia	halitosis
Mentha longifolia	asthma
Mentha longifolia	improve memorizing
Mentha longifolia	bronchitis
Mentha longifolia	migraine
Mentha longifolia	rheumatism
Mentha longifolia	pharyngitis
Mentha longifolia	myalgia
Mentha longifolia	fever
Mentha longifolia	rhinitis
Mentha longifolia	sinusitis
Mentha longifolia	treat cardiovascular diseases
Mentha longifolia	analgesic
Mentha longifolia	toothache
Mentha longifolia	cough
Mentha longifolia	colic
Prunella grandiflora	antiseptic
Prunella grandiflora	antiinflammatory
Centaurea nigra	vasotonic
Centaurea nigra	hypercholesterolemia
Centaurea nigra	cardioprotector
Centaurea nigra	hyperglycemia
Betula pubescens	catarrh
Betula pubescens	gout
Betula pubescens	fever
Betula pubescens	cystitis
Betula pubescens	arthritis
Betula pubescens	diarrhea
Betula pubescens	urethritis
Betula pubescens	psoriasis
Betula pubescens	osteoarthritis
Betula pubescens	analgesic
Betula pubescens	obesity
Asperula cynanchica	dysmenorrhea
Asperula cynanchica	diuretic
Clematis flammula	pneumonia
Ginkgo biloba	circulatory
Ginkgo biloba	against microcirculatory disorders
Ginkgo biloba	against cerebral embolism
Ginkgo biloba	against senile heart failure
Ginkgo biloba	improve memorizing
Ginkgo biloba	migraine
Ginkgo biloba	atherosclerosis
Ginkgo biloba	against cerebral vascular failure
Ginkgo biloba	against arteriopathies
Ginkgo biloba	vasoprotector
Ginkgo biloba	treat peripheral vascular diseases
Ginkgo biloba	cardioprotector
Ginkgo biloba	venotonic
Ginkgo biloba	treat cardiovascular diseases
Ginkgo biloba	cerebral ischemia prevention
Ginkgo biloba	parkinson's disease
Ginkgo biloba	venoprotector
Ginkgo biloba	alzheimer's disease
Ginkgo biloba	vasodilator
Cupressus sempervirens	haemorrhoids
Cupressus sempervirens	toothache
Cupressus sempervirens	cough
Cupressus sempervirens	sedative
Cupressus sempervirens	urinary incontinence
Harpagophytum procumbens	gout
Harpagophytum procumbens	fever
Harpagophytum procumbens	rheumatism
Harpagophytum procumbens	hypercholesterolemia
Harpagophytum procumbens	arthritis
Harpagophytum procumbens	haemorrhoids
Harpagophytum procumbens	osteoarthritis
Harpagophytum procumbens	analgesic
Harpagophytum procumbens	hyperglycemia
Juniperus communis	psoriasis
Juniperus communis	gout
Juniperus communis	ecchymosis
Juniperus communis	rheumatism
Juniperus communis	bruises
Juniperus communis	diarrhea
Juniperus communis	urethritis
Juniperus communis	dysmenorrhea
Juniperus communis	cystitis
Juniperus communis	halitosis
Juniperus communis	hypertension
Juniperus communis	prostatitis
Urtica dioica	circulatory
Urtica dioica	gout
Urtica dioica	cardiotonic
Urtica dioica	cardioprotector
Urtica dioica	neuralgia
Urtica dioica	migraine
Urtica dioica	rheumatism
Urtica dioica	hypercholesterolemia
Urtica dioica	allergy
Urtica dioica	strain
Urtica dioica	alzheimer's disease prevention
Urtica dioica	osteoarthritis
Urtica dioica	kidney stone
Urtica dioica	hypertension
Urtica dioica	benign prostatic hyperplasia
Urtica dioica	venotonic
Urtica dioica	hyperglycemia
Urtica dioica	burns
Urtica dioica	obesity
Urtica dioica	arthritis
Urtica dioica	osteoporosis
Pimpinella anisum	rhinitis
Pimpinella anisum	asthma
Pimpinella anisum	cough
Pimpinella anisum	diarrhea
Pimpinella anisum	bronchitis
Dictamnus albus	hypertension
Filipendula ulmaria	catarrh
Filipendula ulmaria	gout
Filipendula ulmaria	regulate blood pressure
Filipendula ulmaria	rheumatism
Filipendula ulmaria	arthritis
Filipendula ulmaria	conjunctivitis
Filipendula ulmaria	fever
Mentha spicata	catarrh
Mentha spicata	gout
Mentha spicata	fever
Mentha spicata	asthma
Mentha spicata	improve memorizing
Mentha spicata	cough
Mentha spicata	bronchitis
Mentha spicata	migraine
Mentha spicata	rheumatism
Mentha spicata	gastritis
Mentha spicata	pharyngitis
Mentha spicata	myalgia
Mentha spicata	rhinitis
Mentha spicata	sinusitis
Mentha spicata	inflammatory bowel disease
Mentha spicata	halitosis
Mentha spicata	treat cardiovascular diseases
Mentha spicata	analgesic
Mentha spicata	toothache
Mentha spicata	burns
Mentha spicata	colic
Dianthus seguieri	diarrhea
Betula pendula	catarrh
Betula pendula	gout
Betula pendula	fever
Betula pendula	cystitis
Betula pendula	arthritis
Betula pendula	diarrhea
Betula pendula	urethritis
Betula pendula	psoriasis
Betula pendula	osteoarthritis
Betula pendula	hypertension
Betula pendula	analgesic
Betula pendula	obesity
Cetraria islandica	rhinitis
Cetraria islandica	cough
Cetraria islandica	bronchitis
Stevia rebaudiana	diabetes
Stevia rebaudiana	hypertension
Stevia rebaudiana	vasodilator
Boldea fragans	gallstones
Boldea fragans	gout
Boldea fragans	gonorrhea
Boldea fragans	syphilis
Tussilago farfara	catarrh
Tussilago farfara	atherosclerosis
Tussilago farfara	asthma
Tussilago farfara	gastritis
Tussilago farfara	pharyngitis
Tussilago farfara	rhinitis
Tussilago farfara	haemorrhoids
Tussilago farfara	fever
Tussilago farfara	bronchitis
Tussilago farfara	hypertension
Tussilago farfara	cough
Tussilago farfara	silicosis
Lonicera japonica	cough
Lonicera japonica	asthma
Lonicera japonica	gingivitis
Arum italicum	haemorrhoids
Portulaca oleracea	diuretic
Portulaca oleracea	allergy
Portulaca oleracea	fever
Portulaca oleracea	antiinflammatory
Quercus ilex	bruises
Quercus ilex	diarrhea
Quercus ilex	herpes
Quercus ilex	anemia
Umbilicus rupestris	burns
Umbilicus rupestris	rheumatism
Umbilicus rupestris	arthritis
Umbilicus rupestris	diarrhea
Umbilicus rupestris	inflammatory bowel disease
Umbilicus rupestris	ophthalmic antiseptic
Umbilicus rupestris	cough
Lythrum salicaria	diarrhea
Lythrum salicaria	leukorrhea
Lythrum salicaria	dyspepsia
Alyssum maritimum	kidney stone
Verbascum thapsus	burns
Verbascum thapsus	bronchitis
Verbascum thapsus	otalgia
Verbascum thapsus	diarrhea
Verbascum thapsus	rhinitis
Verbascum thapsus	haemorrhoids
Verbascum thapsus	cough
Pinus mugo	fever
Erica arborea	rheumatism
Erica arborea	osteoarthritis
Erica arborea	neoplasia
Erica arborea	cystitis
Erica arborea	urethritis
Aloe vera	psoriasis
Aloe vera	asthma
Aloe vera	bruises
Aloe vera	arthritis
Aloe vera	myalgia
Aloe vera	osteoarthritis
Aloe vera	gingivitis
Aloe vera	analgesic
Aloe vera	hyperglycemia
Aloe vera	burns
Tamus communis	vasotonic
Artemisia absinthium	hypercholesterolemia
Artemisia absinthium	gastritis
Alchemilla vulgaris	catarrh
Alchemilla vulgaris	rheumatism
Alchemilla vulgaris	pharyngitis
Alchemilla vulgaris	diarrhea
Pulmonaria affinis	catarrh
Pulmonaria affinis	fever
Pulmonaria affinis	bronchitis
Pulmonaria affinis	pharyngitis
Pulmonaria affinis	diarrhea
Pulmonaria affinis	urethritis
Pulmonaria affinis	emphysema
Pulmonaria affinis	cystitis
Pulmonaria affinis	gingivitis
Pulmonaria affinis	cough
Cannabis sativa	sedative
Cannabis sativa	neuropathic pain
Cannabis sativa	neoplasia
Cannabis sativa	analgesic
Cannabis sativa	multiple sclerosis
Cannabis sativa	parkinson's disease
Cannabis sativa	vasodilator
Rubus fruticosus	haemorrhoids
Rubus fruticosus	hypercholesterolemia
Rubus fruticosus	diarrhea
Rubus fruticosus	venoprotector
Rubus fruticosus	venotonic
Salix alba	catarrh
Salix alba	fever
Salix alba	leukorrhea
Salix alba	migraine
Salix alba	rheumatism
Salix alba	sedative
Salix alba	rhinitis
Salix alba	analgesic
Salix alba	toothache
Viola arvensis	gout
Fumaria officinalis	catarrh
Fumaria officinalis	conjunctivitis
Robinia pseudoacacia	diarrhea
Trifolium pratense	psoriasis
Trifolium pratense	gout
Trifolium pratense	bronchitis
Trifolium pratense	arthritis
Trifolium pratense	cough
Trifolium pratense	cataract
Arctostaphylos uva-ursi	diuretic
Arctostaphylos uva-ursi	leukorrhea
Arctostaphylos uva-ursi	nocturnal enuresis
Arctostaphylos uva-ursi	diarrhea
Arctostaphylos uva-ursi	prostatitis
Arctostaphylos uva-ursi	renal failure
Arctostaphylos uva-ursi	urolithiasis
Arctostaphylos uva-ursi	urinary incontinence
Centaurea collina	hyperglycemia
Citrus medica	circulatory
Citrus medica	anxiety
Citrus medica	bronchitis
Citrus medica	hypercholesterolemia
Citrus medica	sedative
Citrus medica	vasoprotector
Citrus medica	haemorrhoids
Citrus medica	fever
Citrus medica	cardioprotector
Citrus medica	neurodegenerative diseases
Citrus medica	cough
Citrus medica	arthritis
Vincetoxicum nigrum	fever
Bryonia cretica	antiseptic
Bryonia cretica	bruises
Populus nigra	gout
Populus nigra	bronchitis
Populus nigra	rheumatism
Malva sylvestris	catarrh
Malva sylvestris	headache
Malva sylvestris	stomatitis
Malva sylvestris	asthma
Malva sylvestris	bronchitis
Malva sylvestris	migraine
Malva sylvestris	pharyngitis
Malva sylvestris	rhinitis
Malva sylvestris	otalgia
Malva sylvestris	aphonia
Malva sylvestris	cough
Malva sylvestris	haemorrhoids
Malva sylvestris	laryngitis
Malva sylvestris	tonsillitis
Quercus pyrenaica	leukorrhea
Quercus pyrenaica	gastroenteritis
Quercus pyrenaica	antihemorrhagic
Quercus pyrenaica	diarrhea
Quercus pyrenaica	gingivitis
Quercus pyrenaica	gonorrhea
Quercus pyrenaica	cough
Vinca herbacea	lupus
Vinca herbacea	loss memory prevention
Vinca herbacea	gingivitis
Vinca herbacea	parkinson's disease
Vinca herbacea	alzheimer's disease
Vinca herbacea	neurodegenerative diseases
Sambucus nigra	gout
Sambucus nigra	bronchitis
Sambucus nigra	otalgia
Sambucus nigra	allergy
Sambucus nigra	gingivitis
Sambucus nigra	cough
Sambucus nigra	haemorrhoids
Sambucus nigra	migraine
Sambucus nigra	rheumatism
Sambucus nigra	neuralgia
Sambucus nigra	diarrhea
Sambucus nigra	oral ulcer
Sambucus nigra	conjunctivitis
Sambucus nigra	anti-influenzal
Sambucus nigra	analgesic
Sambucus nigra	nausea
Sambucus nigra	headache
Sambucus nigra	catarrh
Sambucus nigra	fever
Sambucus nigra	hyperuricemia
Sambucus nigra	pharyngitis
Sambucus nigra	ophthalmic antiseptic
Sambucus nigra	vulnerary
Sambucus nigra	antiseptic
Sambucus nigra	burns
Sambucus nigra	tonsillitis
Sambucus nigra	pneumonia
Sambucus nigra	inflammatory bowel disease
Sambucus nigra	antidermatosic
Sambucus nigra	nasal congestion
Sambucus nigra	buccopharyngic antiseptic
Verbena officinalis	cardiotonic
Verbena officinalis	ecchymosis
Verbena officinalis	antiinflammatory
Verbena officinalis	pneumonia
Verbena officinalis	osteoarthritis
Verbena officinalis	neoplasia
Verbena officinalis	analgesic
Veronica officinalis	catarrh
Veronica officinalis	pharyngitis
Veronica officinalis	diarrhea
Veronica officinalis	cough
Linum bienne	catarrh
Linum bienne	psoriasis
Linum bienne	fever
Linum bienne	migraine
Linum bienne	pharyngitis
Linum bienne	toothache
Linum bienne	cough
Lonicera implexa	cough
Lonicera implexa	asthma
Lonicera implexa	gingivitis
Arctium minus	gout
Arctium minus	arthritis
Arctium minus	asthma
Arctium minus	rheumatism
Arctium minus	allergy
Arctium minus	urethritis
Arctium minus	fever
Arctium minus	cystitis
Arctium minus	kidney stone
Arctium minus	analgesic
Arctium minus	hyperglycemia
Arctium minus	cough
Arctium minus	obesity
Arctium minus	urolithiasis
Gentiana verna	gout
Gentiana verna	fever
Gentiana verna	asthma
Gentiana verna	malaria
Gentiana verna	migraine
Gentiana verna	jaundice
Sanguisorba minor	ophthalmic antiseptic
Laurus nobilis	psoriasis
Laurus nobilis	cardiac rhythm regulator
Laurus nobilis	rheumatism
Laurus nobilis	sedative
Laurus nobilis	rhinitis
Laurus nobilis	migraine
Laurus nobilis	weakness
Helichrysum stoechas	catarrh
Helichrysum stoechas	bronchitis
Helichrysum stoechas	allergy
Helichrysum stoechas	diarrhea
Helichrysum stoechas	sinusitis
Helichrysum stoechas	cough
Polygonum bistorta	leukorrhea
Polygonum bistorta	pharyngitis
Polygonum bistorta	diarrhea
Polygonum bistorta	urethritis
Polygonum bistorta	gingivitis
Polygonum bistorta	toothache
Polygonum bistorta	tonsillitis
Dorycnium pentaphyllum	diarrhea
Reichardia picroides	hyperglycemia
Mentha piperita	cough
Fraxinus excelsior	fever
Fraxinus excelsior	rheumatism
Fraxinus excelsior	hypercholesterolemia
Fraxinus excelsior	osteoarthritis
Fraxinus excelsior	neoplasia
Fraxinus excelsior	analgesic
Fraxinus excelsior	obesity
Buxus sempervirens	chilblain
Prunus domestica	gout
Prunus domestica	arthritis
Prunus domestica	cancer
Prunus domestica	gallstones
Prunus domestica	rheumatism
Prunus domestica	atherosclerosis
Prunus domestica	prostatitis
Prunus domestica	vasoprotector
Prunus domestica	fever
Prunus domestica	obesity
Euphrasia rostkoviana	catarrh
Euphrasia rostkoviana	rhinitis
Euphrasia rostkoviana	allergy
Euphrasia rostkoviana	pharyngitis
Euphrasia rostkoviana	diarrhea
Euphrasia rostkoviana	sinusitis
Cirsium eriophorum	antiseptic
Silybum marianum	hypotension
Silybum marianum	haemorrhoids
Silybum marianum	migraine
Silybum marianum	hepatitis
Silybum marianum	cirrhosis
Silybum marianum	antihemorrhagic
Silybum marianum	jaundice
Urtica urens	gout
Urtica urens	arthritis
Urtica urens	neuralgia
Urtica urens	migraine
Urtica urens	rheumatism
Urtica urens	hypercholesterolemia
Urtica urens	allergy
Urtica urens	strain
Urtica urens	osteoarthritis
Urtica urens	kidney stone
Urtica urens	alzheimer's disease prevention
Urtica urens	benign prostatic hyperplasia
Urtica urens	hyperglycemia
Urtica urens	burns
Urtica urens	obesity
Urtica urens	osteoporosis
Equisetum arvense	gout
Equisetum arvense	antihemorrhagic
Equisetum arvense	haemorrhoids
Equisetum arvense	kidney stone
Equisetum arvense	hypertension
Equisetum arvense	gingivitis
Equisetum arvense	tuberculosis
Equisetum arvense	obesity
Equisetum arvense	neoplasia
Equisetum arvense	osteoporosis
Hedera helix	analgesic
Hedera helix	rheumatism
Hedera helix	toothache
Hedera helix	cough
Hedera helix	neuralgia
Rorippa nasturtium-aquaticum	rheumatism
Galium odoratum	diuretic
Vitex agnus-castus	hyperglycemia
Vitex agnus-castus	sedative
Vitex agnus-castus	cardiovascular regulator
Quercus faginea	leukorrhea
Quercus faginea	gastroenteritis
Quercus faginea	antihemorrhagic
Quercus faginea	diarrhea
Quercus faginea	gingivitis
Quercus faginea	gonorrhea
Quercus faginea	cough
Pistacia lentiscus	ecchymosis
Pistacia lentiscus	anti-influenzal
Lepidium peruvianum	weakness
Lepidium peruvianum	osteoporosis
Centrathus ruber	sedative
Galium aparine	fever
Verbena chamaedryfolia	kidney stone
Verbena chamaedryfolia	antiinflammatory
Lychnis coronaria	bruises
Erica scoparia	rheumatism
Erica scoparia	cystitis
Erica scoparia	urethritis
Erica scoparia	osteoarthritis
Erica scoparia	neoplasia
Erica scoparia	vomiting
Anthyllis vulneraria	hypertension
Allium sativum	cancer
Allium sativum	bronchitis
Allium sativum	otalgia
Allium sativum	hypercholesterolemia
Allium sativum	rhinitis
Allium sativum	hypertension
Allium sativum	neurodegenerative diseases
Allium sativum	toothache
Allium sativum	depression
Allium sativum	antihelmintic
Allium sativum	migraine
Allium sativum	diarrhea
Allium sativum	antiinflammatory
Allium sativum	vasoprotector
Allium sativum	analgesic
Allium sativum	headache
Allium sativum	catarrh
Allium sativum	fever
Allium sativum	atherosclerosis
Allium sativum	gastroenteritis
Allium sativum	arthritis
Allium sativum	diabetes
Allium sativum	pharyngitis
Allium sativum	haemorrhoids
Rosa tomentosa	pharyngitis
Rosa tomentosa	anti-influenzal
Rosa tomentosa	ophthalmic antiseptic
Citrus grandis	anxiety
Citrus grandis	bronchitis
Citrus grandis	hypercholesterolemia
Citrus grandis	sedative
Citrus grandis	fever
Citrus grandis	neurodegenerative diseases
Citrus grandis	cough
Citrus grandis	arthritis
Brassica oleracea	anxiety
Brassica oleracea	low back pain
Brassica oleracea	peptic ulcer
Brassica oleracea	bone reinforcer
Brassica oleracea	aphonia
Brassica oleracea	diabetes
Daucus carota	hypercholesterolemia
Daucus carota	arthritis
Daucus carota	diarrhea
Daucus carota	neoplasia
Hyoscyamus niger	increase arterial circulation
Hyoscyamus niger	reduce capillar circulation
Hyoscyamus niger	toothache
Hyoscyamus niger	asthma
Hyoscyamus niger	neuralgia
Ruta montana	migraine
Ruta montana	rheumatism
Ruta montana	sedative
Ruta montana	hemoptysis
Ruta montana	otalgia
Ruta montana	osteoarthritis
Ruta montana	nephritis
Abies alba	catarrh
Abies alba	cough
Abies alba	against couperose
Prunus spinosa	asthma
Prunus spinosa	sedative
Prunus spinosa	diarrhea
Prunus spinosa	rhinitis
Prunus spinosa	analgesic
Prunus spinosa	hyperglycemia
Borago officinalis	catarrh
Borago officinalis	rhinitis
Borago officinalis	hypercholesterolemia
Borago officinalis	arthritis
Borago officinalis	vasoprotector
Borago officinalis	hypertension
Borago officinalis	treat cardiovascular diseases
Borago officinalis	cough
Sarothamnus scoparius	urolithiasis
Paullinia cupana	migraine
Paullinia cupana	weakness
Paullinia cupana	diarrhea
Paullinia cupana	increase cardiac contraction
Paullinia cupana	cranial vasoconstrictor
Paullinia cupana	hyperglycemia
Paullinia cupana	vasodilator
Cichorium intybus	fever
Citrus deliciosa	anxiety
Citrus deliciosa	bronchitis
Citrus deliciosa	hypercholesterolemia
Citrus deliciosa	sedative
Citrus deliciosa	fever
Citrus deliciosa	neurodegenerative diseases
Citrus deliciosa	cough
Citrus deliciosa	arthritis
Zea mays	gout
Zea mays	hypercholesterolemia
Zea mays	urethritis
Zea mays	cystitis
Zea mays	hypertension
Zea mays	urolithiasis
Zea mays	diuretic
Thymus vulgaris	catarrh
Thymus vulgaris	increase blood flow
Thymus vulgaris	ophthalmic antiseptic
Thymus vulgaris	gastritis
Thymus vulgaris	pharyngitis
Thymus vulgaris	diarrhea
Thymus vulgaris	antiinflammatory
Thymus vulgaris	conjunctivitis
Thymus vulgaris	hypotension
Thymus vulgaris	hypertension
Thymus vulgaris	antidermatosic
Thymus vulgaris	urinary tract infections
Thymus vulgaris	vulnerary
Thymus vulgaris	gingivitis
Thymus vulgaris	inflammatory bowel disease
Thymus vulgaris	hyperglycemia
Thymus vulgaris	diuretic
Thymus vulgaris	buccopharyngic antiseptic
Thymus vulgaris	antiseptic
Thymus vulgaris	toothache
Thymus vulgaris	nausea
Ilex paraguaryensis	toothache
Ilex paraguaryensis	cardioprotector
Ilex paraguaryensis	hypertension
Ilex paraguaryensis	cough
Ilex paraguaryensis	vasodilator
Stachys byzantina	analgesic
Stachys byzantina	bruises
Stachys byzantina	burns
Anchusa azurea	catarrh
Anchusa azurea	bronchitis
Cynodon dactylon	rheumatism
Meun athamanticum	hypertension
Prunus avium	gout
Prunus avium	arthritis
Prunus avium	cancer
Prunus avium	gallstones
Prunus avium	rheumatism
Prunus avium	atherosclerosis
Prunus avium	prostatitis
Prunus avium	vasoprotector
Prunus avium	fever
Prunus avium	inflammatory bowel disease
Prunus avium	obesity
Prunus avium	nausea
Foeniculum vulgare	catarrh
Foeniculum vulgare	halitosis
Foeniculum vulgare	asthma
Foeniculum vulgare	hypercholesterolemia
Foeniculum vulgare	diarrhea
Foeniculum vulgare	inflammatory bowel disease
Foeniculum vulgare	obesity
Foeniculum vulgare	diuretic
Foeniculum vulgare	diabetes
Veronica serpyllifolia	ophthalmic antiseptic
Humulus lupulus	anxiety
Humulus lupulus	sedative
Arnica montana	catarrh
Arnica montana	vasotonic
Arnica montana	atherosclerosis
Arnica montana	cough
Arnica montana	bronchitis
Arnica montana	arthralgia
Arnica montana	treat cardiovascular diseases
Arnica montana	pharyngitis
Arnica montana	antiinflammatory
Arnica montana	fever
Arnica montana	venotonic
Arnica montana	vulnerary
Arnica montana	analgesic
Arnica montana	bruises
Arnica montana	stomatitis
Arnica montana	burns
Arnica montana	apoplexy
Arnica montana	ecchymosis
Arnica montana	headache
Rhamnus frangula	cough
Quercus humilis	leukorrhea
Quercus humilis	gastroenteritis
Quercus humilis	antihemorrhagic
Quercus humilis	diarrhea
Quercus humilis	gingivitis
Quercus humilis	gonorrhea
Quercus humilis	cough
Lonicera nigra	cough
Lonicera nigra	asthma
Lonicera nigra	gingivitis
Matricaria recutita	catarrh
Matricaria recutita	fever
Matricaria recutita	asthma
Matricaria recutita	gastritis
Matricaria recutita	migraine
Matricaria recutita	allergy
Matricaria recutita	sedative
Matricaria recutita	conjunctivitis
Matricaria recutita	bronchitis
Matricaria recutita	ophthalmic antiseptic
Matricaria recutita	inflammatory bowel disease
Matricaria recutita	antiseptic
Matricaria recutita	vomiting
Matricaria recutita	laryngitis
Matricaria recutita	nausea
Knautia arvensis	haemorrhoids
Onobrychis viciifolia	diarrhea
Lamium album	diarrhea
Lamium album	pharyngitis
Lamium album	leukorrhea
Lamium album	cough
Lamium album	bronchitis
Polygala vulgaris	inflammatory bowel disease
Achillea millefolium	catarrh
Achillea millefolium	gout
Achillea millefolium	fever
Achillea millefolium	asthma
Achillea millefolium	peptic ulcer
Achillea millefolium	migraine
Achillea millefolium	rheumatism
Achillea millefolium	hypercholesterolemia
Achillea millefolium	hepatitis
Achillea millefolium	rhinitis
Achillea millefolium	haemorrhoids
Achillea millefolium	kidney stone
Achillea millefolium	gallstones
Achillea millefolium	hypertension
Achillea millefolium	depression
Nicotiana tabacum	pneumonia
Vaccinium myrtillus	atherosclerosis
Vaccinium myrtillus	cardioprotector
Vaccinium myrtillus	migraine
Vaccinium myrtillus	rheumatism
Vaccinium myrtillus	skin ulcer
Vaccinium myrtillus	pharyngitis
Vaccinium myrtillus	diarrhea
Vaccinium myrtillus	vasoprotector
Vaccinium myrtillus	haemorrhoids
Vaccinium myrtillus	fever
Vaccinium myrtillus	venotonic
Vaccinium myrtillus	hyperglycemia
Vaccinium myrtillus	diabetes
Vaccinium myrtillus	laryngitis
Vaccinium myrtillus	tonsillitis
Capsella bursa-pastoris	haemorrhoids
Capsella bursa-pastoris	cystitis
Capsella bursa-pastoris	diarrhea
Agave americana	pneumonia
Triticum aestivum	burns
Hypericum tetrapterum	analgesic
Hypericum tetrapterum	antiinflammatory
Cistus monspeliensis	antihelmintic
Cistus monspeliensis	skin ulcer
Castanea sativa	vasotonic
Castanea sativa	fever
Castanea sativa	migraine
Castanea sativa	chilblain
Castanea sativa	dysmenorrhea
Castanea sativa	hypertension
Castanea sativa	analgesic
Castanea sativa	bronchodilator
Linum usitatissinum	catarrh
Linum usitatissinum	psoriasis
Linum usitatissinum	fever
Linum usitatissinum	bronchitis
Linum usitatissinum	migraine
Linum usitatissinum	pharyngitis
Linum usitatissinum	pneumonia
Linum usitatissinum	against couperose
Linum usitatissinum	toothache
Linum usitatissinum	cough
Linum usitatissinum	apoplexy
Trifolium incarnatum	diuretic
Ruta graveolens	migraine
Ruta graveolens	rheumatism
Ruta graveolens	sedative
Ruta graveolens	hemoptysis
Ruta graveolens	vasoprotector
Ruta graveolens	haemorrhoids
Ruta graveolens	osteoarthritis
Ruta graveolens	nephritis
Ruta graveolens	otalgia
Primula acaulis	catarrh
Primula acaulis	gout
Primula acaulis	arthritis
Primula acaulis	neuralgia
Primula acaulis	rheumatism
Primula acaulis	sedative
Primula acaulis	myalgia
Primula acaulis	rhinitis
Primula acaulis	cough
Solanum lycopersicum	kidney stone
Hyssopus officinalis	catarrh
Hyssopus officinalis	asthma
Hyssopus officinalis	allergy
Hyssopus officinalis	diarrhea
Hyssopus officinalis	kidney stone
Hyssopus officinalis	gastroenteritis
Hyssopus officinalis	leukorrhea
Hyssopus officinalis	urolithiasis
Senecio vulgaris	gout
Senecio vulgaris	hyperuricemia
Helianthemum oelandicum	pharyngitis
Nepeta cataria	cough
Nepeta cataria	vomiting
Fraxinus ornus	fever
Fraxinus ornus	rheumatism
Fraxinus ornus	hypercholesterolemia
Fraxinus ornus	osteoarthritis
Fraxinus ornus	neoplasia
Fraxinus ornus	analgesic
Fraxinus ornus	obesity
Passiflora caerulea	anxiety
Passiflora caerulea	hypercholesterolemia
Passiflora caerulea	allergy
Passiflora caerulea	sedative
Passiflora caerulea	obesity
Passiflora caerulea	diabetes
Hamamelis virginiana	circulatory
Hamamelis virginiana	haemorrhoids
Hamamelis virginiana	conjunctivitis
Hamamelis virginiana	venotonic
Hamamelis virginiana	burns
Hamamelis virginiana	venoprotector
Salix fragilis	catarrh
Salix fragilis	fever
Salix fragilis	leukorrhea
Salix fragilis	migraine
Salix fragilis	rheumatism
Salix fragilis	sedative
Salix fragilis	rhinitis
Salix fragilis	analgesic
Salix fragilis	toothache
Ocimum basilicum	otalgia
Ocimum basilicum	arthralgia
Ocimum basilicum	rhinitis
Lilium candidum	vulnerary
Calendula arvensis	burns
Calendula arvensis	gingivitis
Calendula arvensis	peptic ulcer
Allium ampeloprasum	catarrh
Allium ampeloprasum	rhinitis
Allium ampeloprasum	atherosclerosis
Allium ampeloprasum	bronchitis
Allium ampeloprasum	otalgia
Allium ampeloprasum	hypercholesterolemia
Allium ampeloprasum	arthritis
Allium ampeloprasum	diarrhea
Allium ampeloprasum	vasoprotector
Allium ampeloprasum	haemorrhoids
Allium ampeloprasum	fever
Allium ampeloprasum	hypertension
Allium ampeloprasum	neurodegenerative diseases
Allium ampeloprasum	gastroenteritis
Allium ampeloprasum	toothache
Allium ampeloprasum	pharyngitis
Allium ampeloprasum	depression
Allium ampeloprasum	diabetes
Verbascum phlomoides	cough
Verbascum phlomoides	bronchitis
Verbascum phlomoides	otalgia
Verbascum phlomoides	diarrhea
Verbascum phlomoides	rhinitis
Verbascum phlomoides	burns
Lippia triphylla	migraine
Lippia triphylla	apoplexy
Lippia triphylla	diarrhea
Lippia triphylla	depression
Rheum officinale	circulatory
Rheum officinale	stomatitis
Rheum officinale	gingivitis
Eucalyptus globulus	catarrh
Eucalyptus globulus	fever
Eucalyptus globulus	asthma
Eucalyptus globulus	bronchitis
Eucalyptus globulus	respiratory tract infections
Eucalyptus globulus	rheumatism
Eucalyptus globulus	pharyngitis
Eucalyptus globulus	sinusitis
Eucalyptus globulus	rheumatoid arthritis
Eucalyptus globulus	osteoarthritis
Eucalyptus globulus	neoplasia
Eucalyptus globulus	hyperglycemia
Eucalyptus globulus	cough
Eucalyptus globulus	laryngitis
Eucalyptus globulus	diabetes
Glycine max	psoriasis
Glycine max	cardioprotector
Glycine max	hypercholesterolemia
Glycine max	atherosclerosis
Glycine max	against cerebral vascular failure
Glycine max	depression
Glycine max	loss memory prevention
Glycine max	neoplasia
Glycine max	treat cardiovascular diseases
Glycine max	obesity
Glycine max	improve brain blood supply
Glycine max	alzheimer's disease
Glycine max	osteoporosis
Vincetoxicum hirundinaria	analgesic
Vincetoxicum hirundinaria	antiseptic
Vicia faba	haemorrhoids
Vicia faba	inflammatory bowel disease
Rosa canina	catarrh
Rosa canina	fever
Rosa canina	diarrhea
Rosa canina	kidney stone
Rosa canina	hypertension
Rosa canina	gingivitis
Rosa canina	depression
Salvia officinalis	toothache
Salvia officinalis	vasotonic
Salvia officinalis	cardiotonic
Salvia officinalis	stomatitis
Salvia officinalis	dyspepsia
Salvia officinalis	antihemorrhagic
Salvia officinalis	pharyngitis
Salvia officinalis	diarrhea
Salvia officinalis	sedative
Salvia officinalis	oral ulcer
Salvia officinalis	gastroenteritis
Salvia officinalis	hypotension
Salvia officinalis	hypertension
Salvia officinalis	gingivitis
Salvia officinalis	halitosis
Salvia officinalis	migraine
Salvia officinalis	hyperglycemia
Salvia officinalis	tonsillitis
Salvia officinalis	apoplexy
Salvia officinalis	alzheimer's disease
Salvia officinalis	diabetes
Mandragora officinarum	increase arterial circulation
Mandragora officinarum	asthma
Mandragora officinarum	peptic ulcer
Mandragora officinarum	neuralgia
Mandragora officinarum	sedative
Mandragora officinarum	against bradycardia
Mandragora officinarum	hypertension
Mandragora officinarum	reduce capillar circulation
Mandragora officinarum	against asystole
Mandragora officinarum	cough
Sambucus ebulus	brucellosis
Viola sylvestris	catarrh
Viola sylvestris	migraine
Viola sylvestris	tonsillitis
Viola sylvestris	cough
Viola sylvestris	bronchitis
Parietaria officinalis	vaginal infections
Parietaria officinalis	hyperuricemia
Parietaria officinalis	migraine
Parietaria officinalis	kidney stone
Parietaria officinalis	inflammatory bowel disease
Parietaria officinalis	antidermatosic
Parietaria officinalis	vulnerary
Parietaria officinalis	antiseptic
Parietaria officinalis	headache
Parietaria officinalis	tonsillitis
Quercus suber	bruises
Quercus suber	diarrhea
Calendula officinalis	cardioprotector
Calendula officinalis	peptic ulcer
Calendula officinalis	gastritis
Calendula officinalis	rhinitis
Calendula officinalis	gingivitis
Calendula officinalis	burns
Euphrasia alpina	catarrh
Euphrasia alpina	rhinitis
Euphrasia alpina	allergy
Euphrasia alpina	pharyngitis
Euphrasia alpina	diarrhea
Euphrasia alpina	sinusitis
Melilotus officinalis	gout
Melilotus officinalis	sedative
Melilotus officinalis	vasoprotector
Melilotus officinalis	kidney stone
Melilotus officinalis	venotonic
Melilotus officinalis	cough
Mentha cervina	catarrh
Mentha cervina	gout
Mentha cervina	halitosis
Mentha cervina	asthma
Mentha cervina	improve memorizing
Mentha cervina	cough
Mentha cervina	bronchitis
Mentha cervina	migraine
Mentha cervina	rheumatism
Mentha cervina	pharyngitis
Mentha cervina	myalgia
Mentha cervina	rhinitis
Mentha cervina	sinusitis
Mentha cervina	fever
Mentha cervina	analgesic
Mentha cervina	toothache
Mentha cervina	burns
Mentha cervina	colic
Allium schoenoprasum	catarrh
Allium schoenoprasum	rhinitis
Allium schoenoprasum	atherosclerosis
Allium schoenoprasum	bronchitis
Allium schoenoprasum	otalgia
Allium schoenoprasum	hypercholesterolemia
Allium schoenoprasum	arthritis
Allium schoenoprasum	diarrhea
Allium schoenoprasum	vasoprotector
Allium schoenoprasum	haemorrhoids
Allium schoenoprasum	fever
Allium schoenoprasum	hypertension
Allium schoenoprasum	neurodegenerative diseases
Allium schoenoprasum	gastroenteritis
Allium schoenoprasum	toothache
Allium schoenoprasum	pharyngitis
Allium schoenoprasum	depression
Allium schoenoprasum	diabetes
Ficus carica	cardiotonic
Ficus carica	cancer
Ficus carica	hypercholesterolemia
Ficus carica	sedative
Ficus carica	toothache
Ficus carica	burns
Papaver somniferum	analgesic
Papaver somniferum	cough
Papaver somniferum	sedative
Papaver somniferum	tuberculosis
Papaver somniferum	fever
Satureja calamintha	sedative
Satureja calamintha	diarrhea
Plantago major	sedative
Plantago major	hyperuricemia
Plantago major	bronchitis
Plantago major	pharyngitis
Plantago major	allergy
Plantago major	diarrhea
Plantago major	haemorrhoids
Plantago major	cystitis
Plantago major	aphonia
Plantago major	toothache
Plantago major	burns
Plantago major	laryngitis
Equisetum telmateia	gout
Equisetum telmateia	fever
Equisetum telmateia	antihemorrhagic
Equisetum telmateia	antiinflammatory
Equisetum telmateia	kidney stone
Equisetum telmateia	hypertension
Equisetum telmateia	gingivitis
Equisetum telmateia	tuberculosis
Equisetum telmateia	obesity
Equisetum telmateia	diuretic
Equisetum telmateia	neoplasia
Equisetum telmateia	osteoporosis
Satureja hortensis	gout
Satureja hortensis	pharyngitis
Satureja hortensis	leukorrhea
Satureja hortensis	bronchitis
Satureja hortensis	weakness
Satureja hortensis	paralysis
Satureja hortensis	diarrhea
Satureja hortensis	hyperlipidemia
Satureja hortensis	enterocolitis
Satureja hortensis	laryngitis
Scabiosa atropurpurea	catarrh
Scabiosa atropurpurea	measles
Scabiosa atropurpurea	acne
Scabiosa atropurpurea	scarlett fever
Scabiosa atropurpurea	hyperglycemia
Scabiosa atropurpurea	toothache
Ruta chalepensis	migraine
Ruta chalepensis	rheumatism
Ruta chalepensis	sedative
Ruta chalepensis	hemoptysis
Ruta chalepensis	otalgia
Ruta chalepensis	osteoarthritis
Ruta chalepensis	nephritis
Scabiosa columbaria	diphteria
Ceratonia siliqua	diarrhea
Stachys officinalis	anxiety
Stachys officinalis	asthma
Stachys officinalis	migraine
Stachys officinalis	sedative
Stachys officinalis	diarrhea
Stachys officinalis	cystitis
Stachys officinalis	fever
Stachys officinalis	hypertension
Stachys officinalis	gingivitis
Stachys officinalis	analgesic
Lonicera caprifolium	cough
Lonicera caprifolium	asthma
Lonicera caprifolium	gingivitis
Atropa belladonna	asthma
Atropa belladonna	peptic ulcer
Atropa belladonna	increase cardiac rhythm
Atropa belladonna	haemorrhoids
Atropa belladonna	against bradycardia
Atropa belladonna	analgesic
Atropa belladonna	against asystole
Atropa belladonna	cough
Paliurus spina-christi	vasotonic
Paliurus spina-christi	hypercholesterolemia
Primula veris	catarrh
Primula veris	gout
Primula veris	arthritis
Primula veris	neuralgia
Primula veris	rheumatism
Primula veris	sedative
Primula veris	myalgia
Primula veris	rhinitis
Primula veris	cough
Sonchus oleraceus	gout
Sonchus oleraceus	hyperuricemia
Symphytum officinale	arthritis
Symphytum officinale	peptic ulcer
Ulmus glabra	gout
Ulmus glabra	anxiety
Ulmus glabra	sedative
Ulmus glabra	arthralgia
Ulmus glabra	rheumatism
Satureja montana	gout
Satureja montana	pharyngitis
Satureja montana	leukorrhea
Satureja montana	bronchitis
Satureja montana	weakness
Satureja montana	paralysis
Satureja montana	diarrhea
Satureja montana	hyperlipidemia
Satureja montana	enterocolitis
Satureja montana	laryngitis
Jasonia tuberosa	buccopharyngic antiseptic
Punica granatum	hypercholesterolemia
Punica granatum	pharyngitis
Punica granatum	diarrhea
Punica granatum	laryngitis
Punica granatum	tonsillitis
Allium cepa	catarrh
Allium cepa	circulatory
Allium cepa	cardioprotector
Allium cepa	asthma
Allium cepa	cancer
Allium cepa	bronchitis
Allium cepa	antihemorrhagic
Allium cepa	hypercholesterolemia
Allium cepa	allergy
Allium cepa	prostatitis
Allium cepa	vasoprotector
Allium cepa	osteoarthritis
Allium cepa	hypertension
Allium cepa	diabetes
Allium cepa	treat cardiovascular diseases
Allium cepa	nasal congestion
Allium cepa	cough
Allium cepa	buccopharyngic antiseptic
Allium cepa	osteoporosis
Satureja fruticosa	catarrh
Echinacea angustifolia	catarrh
Echinacea angustifolia	psoriasis
Echinacea angustifolia	otitis
Echinacea angustifolia	pharyngitis
Echinacea angustifolia	rhinitis
Echinacea angustifolia	respiratory tract infections
Echinacea angustifolia	sinusitis
Echinacea angustifolia	allergic asthma
Echinacea angustifolia	toothache
Echinacea angustifolia	tracheitis
Echinacea angustifolia	laryngitis
Rhododendron ferrugineum	gout
Rhododendron ferrugineum	arthritis
Rhododendron ferrugineum	cough
Rhododendron ferrugineum	rheumatism
Fraxinus angustifolia subsp oxycarpa	fever
Fraxinus angustifolia subsp oxycarpa	rheumatism
Fraxinus angustifolia subsp oxycarpa	hypercholesterolemia
Fraxinus angustifolia subsp oxycarpa	osteoarthritis
Fraxinus angustifolia subsp oxycarpa	neoplasia
Fraxinus angustifolia subsp oxycarpa	analgesic
Fraxinus angustifolia subsp oxycarpa	obesity
Clematis vitalba	neuralgia
Rheum rhabarbarum	circulatory
Rheum rhabarbarum	stomatitis
Rheum rhabarbarum	gingivitis
Plantago coronopus	catarrh
Plantago coronopus	pharyngitis
Helianthus tuberosus	cancer
Opuntia ficus-indica	otalgia
Opuntia ficus-indica	rheumatism
Opuntia ficus-indica	asthma
Allium ampeloprasum	diarrhea
Echinacea purpurea	catarrh
Echinacea purpurea	psoriasis
Echinacea purpurea	otitis
Echinacea purpurea	pharyngitis
Echinacea purpurea	rhinitis
Echinacea purpurea	respiratory tract infections
Echinacea purpurea	sinusitis
Echinacea purpurea	allergic asthma
Echinacea purpurea	toothache
Echinacea purpurea	tracheitis
Echinacea purpurea	laryngitis
Verbascum sinuatum	cough
Verbascum sinuatum	bronchitis
Verbascum sinuatum	otalgia
Verbascum sinuatum	diarrhea
Verbascum sinuatum	rhinitis
Verbascum sinuatum	burns
Hyoscyamus albus	toothache
Hypericum perforatum	catarrh
Hypericum perforatum	psoriasis
Hypericum perforatum	anxiety
Hypericum perforatum	cancer
Hypericum perforatum	sedative
Hypericum perforatum	cardioprotector
Hypericum perforatum	alzheimer's disease
Hypericum perforatum	vulnerary
Hypericum perforatum	analgesic
Hypericum perforatum	ecchymosis
Hypericum perforatum	burns
Hypericum perforatum	depression
Hypericum perforatum	neoplasia
Arctium lappa	gout
Arctium lappa	arthritis
Arctium lappa	asthma
Arctium lappa	rheumatism
Arctium lappa	allergy
Arctium lappa	urethritis
Arctium lappa	fever
Arctium lappa	cystitis
Arctium lappa	kidney stone
Arctium lappa	analgesic
Arctium lappa	hyperglycemia
Arctium lappa	cough
Arctium lappa	obesity
Glycyrrhiza glabra	catarrh
Glycyrrhiza glabra	halitosis
Glycyrrhiza glabra	peptic ulcer
Glycyrrhiza glabra	allergy
Glycyrrhiza glabra	hypotension
Glycyrrhiza glabra	hyperglycemia
Glycyrrhiza glabra	cough
Glycyrrhiza glabra	arthritis
Eryngium campestre	arthralgia
Eryngium campestre	osteoarthritis
Eryngium campestre	kidney stone
Eryngium campestre	rheumatism
Asplenium septentrionale	obesity
Asplenium septentrionale	diuretic
Tanacetum vulgare	migraine
Tanacetum vulgare	hypertension
Lithospermum officinale	gout
Lithospermum officinale	burns
Lithospermum officinale	urolithiasis
Lithospermum officinale	rheumatism
Verbascum lychnitis	cough
Verbascum lychnitis	bronchitis
Verbascum lychnitis	otalgia
Verbascum lychnitis	diarrhea
Verbascum lychnitis	rhinitis
Verbascum lychnitis	burns
Campanula trachelium	vasotonic
Campanula trachelium	diuretic
Cucurbita pepo	allergy
Fumaria capreolata	catarrh
Fumaria capreolata	conjunctivitis
Solidago virgaurea	gout
Solidago virgaurea	stomatitis
Solidago virgaurea	asthma
Solidago virgaurea	antihemorrhagic
Solidago virgaurea	arthralgia
Solidago virgaurea	pharyngitis
Solidago virgaurea	diarrhea
Solidago virgaurea	urethritis
Solidago virgaurea	vasoprotector
Solidago virgaurea	haemorrhoids
Solidago virgaurea	cystitis
Solidago virgaurea	kidney stone
Solidago virgaurea	gingivitis
Solidago virgaurea	benign prostatic hyperplasia
Solidago virgaurea	treat cardiovascular diseases
Solidago virgaurea	rhinitis
Solidago virgaurea	rheumatism
Solidago virgaurea	oliguria
Solidago virgaurea	urolithiasis
Solidago virgaurea	diabetes
Juglans regia	psoriasis
Juglans regia	burns
Juglans regia	cardioprotector
Juglans regia	arthralgia
Juglans regia	hypercholesterolemia
Juglans regia	pharyngitis
Juglans regia	diarrhea
Juglans regia	myalgia
Juglans regia	treat coronary diseases
Juglans regia	conjunctivitis
Juglans regia	hypertension
Juglans regia	neoplasia
Juglans regia	hyperglycemia
Juglans regia	jaundice
Juglans regia	obesity
Juglans regia	vasodilator
Lonicera xylosteum	cough
Lonicera xylosteum	asthma
Lonicera xylosteum	gingivitis
Marrubium vulgare	urolithiasis
Valeriana officinalis	anxiety
Valeriana officinalis	epilepsy
Valeriana officinalis	hypertension
Valeriana officinalis	cough
Valeriana officinalis	sedative
Lonicera alpigena	cough
Lonicera alpigena	asthma
Lonicera alpigena	gingivitis
Drosera rotundifolia	cough
Drosera rotundifolia	asthma
Drosera rotundifolia	bronchitis
Piper nigrum	bruises
Ruscus aculeatus	gout
Ruscus aculeatus	rheumatism
Ruscus aculeatus	vasoprotector
Ruscus aculeatus	haemorrhoids
Ruscus aculeatus	venotonic
Ruscus aculeatus	vasoconstrictor
Ruscus aculeatus	venoprotector
Senecio leucophyllus	catarrh
Senecio leucophyllus	inflammatory bowel disease
Senecio leucophyllus	hypertension
Melissa officinalis	catarrh
Melissa officinalis	gout
Melissa officinalis	asthma
Melissa officinalis	improve memorizing
Melissa officinalis	bronchitis
Melissa officinalis	migraine
Melissa officinalis	sedative
Melissa officinalis	myalgia
Melissa officinalis	depression
Melissa officinalis	alzheimer's disease
Junctus trifidus	diuretic
Azadirachta indica	psoriasis
Azadirachta indica	gout
Azadirachta indica	antihelmintic
Azadirachta indica	malaria
Azadirachta indica	cancer
Azadirachta indica	antithrombotic
Azadirachta indica	measles
Azadirachta indica	hypercholesterolemia
Azadirachta indica	arthritis
Azadirachta indica	bronchopulmonar diseases
Azadirachta indica	candidiasis
Azadirachta indica	sinusitis
Azadirachta indica	haemorrhoids
Azadirachta indica	peptic ulcer
Azadirachta indica	bronchitis
Azadirachta indica	gonorrhea
Azadirachta indica	syphilis
Azadirachta indica	hypertension
Azadirachta indica	tuberculosis
Azadirachta indica	diabetes type ii
Eupatorium cannabinum	pneumonia
Citrus limon	catarrh
Citrus limon	gout
Citrus limon	arthritis
Citrus limon	cancer
Citrus limon	migraine
Citrus limon	rheumatism
Citrus limon	pharyngitis
Citrus limon	diarrhea
Citrus limon	sinusitis
Citrus limon	kidney stone
Citrus limon	hypertension
Citrus limon	neoplasia
Citrus limon	cataract
Citrus limon	cardiovascular disease prevention
Citrus limon	tonsillitis
Polypodium vulgare	cough
Ruta bracteosa	migraine
Ruta bracteosa	rheumatism
Ruta bracteosa	sedative
Ruta bracteosa	hemoptysis
Ruta bracteosa	otalgia
Ruta bracteosa	osteoarthritis
Ruta bracteosa	nephritis
Sideritis hirsuta	apoplexy
Sideritis hirsuta	hypertension
Sideritis hirsuta	peptic ulcer
Centaurea cyanus	circulatory
Citrus paradisi	circulatory
Citrus paradisi	anxiety
Citrus paradisi	bronchitis
Citrus paradisi	hypercholesterolemia
Citrus paradisi	sedative
Citrus paradisi	vasoprotector
Citrus paradisi	haemorrhoids
Citrus paradisi	fever
Citrus paradisi	cardioprotector
Citrus paradisi	neurodegenerative diseases
Citrus paradisi	cough
Citrus paradisi	arthritis
Santolina chamaecyparissus	catarrh
Santolina chamaecyparissus	regulate blood pressure
Santolina chamaecyparissus	sedative
Santolina chamaecyparissus	dysmenorrhea
Santolina chamaecyparissus	ophthalmic antiinflammatory
Santolina chamaecyparissus	ophthalmic antiseptic
Santolina chamaecyparissus	depression
Quercus robur	regulate blood pressure
Quercus robur	leukorrhea
Quercus robur	gonorrhea
Quercus robur	antihemorrhagic
Quercus robur	diarrhea
Quercus robur	gingivitis
Quercus robur	gastroenteritis
Quercus robur	cough
Erica cinerea	rheumatism
Erica cinerea	osteoarthritis
Erica cinerea	neoplasia
Erica cinerea	cystitis
Erica cinerea	urethritis
Sedum telephium	burns
Oenothera biennis	atherosclerosis
Oenothera biennis	migraine
Oenothera biennis	hypercholesterolemia
Oenothera biennis	allergy
Oenothera biennis	diarrhea
Oenothera biennis	rheumatoid arthritis
Oenothera biennis	schizophrenia
Oenothera biennis	treat cardiovascular diseases
Oenothera biennis	vasoconstrictor
Oenothera biennis	obesity
Oenothera biennis	cough
Oenothera biennis	parkinson's disease
Oenothera biennis	depression
Oenothera biennis	osteoporosis
Ranunculus parnassifolius	gangrene
Ranunculus parnassifolius	neoplasia
Ranunculus parnassifolius	haemorrhoids
Pinus sylvestris	catarrh
Pinus sylvestris	rheumatism
Pinus sylvestris	sinusitis
Pinus sylvestris	erectile dysfunction
Pinus sylvestris	neuralgia
Allium porrum	catarrh
Allium porrum	fever
Allium porrum	bronchitis
Allium porrum	otalgia
Allium porrum	hypercholesterolemia
Allium porrum	arthritis
Allium porrum	diarrhea
Allium porrum	rhinitis
Allium porrum	neurodegenerative diseases
Allium porrum	gastroenteritis
Allium porrum	hyperglycemia
Allium porrum	pharyngitis
Allium porrum	toothache
Allium porrum	depression
Allium porrum	diabetes
Erica multiflora	rheumatism
Erica multiflora	osteoarthritis
Erica multiflora	neoplasia
Erica multiflora	cystitis
Erica multiflora	urethritis
Cannabis indica	sedative
Cannabis indica	neuropathic pain
Cannabis indica	neoplasia
Cannabis indica	analgesic
Cannabis indica	multiple sclerosis
Cannabis indica	parkinson's disease
Succisa pratensis	measles
Succisa pratensis	diarrhea
Thymus serpyllum subsp chamaedrys	rhinitis
Ruta chapelensis	anxiety
Ruta chapelensis	otalgia
Ruta chapelensis	bruises
Ruta chapelensis	pharyngitis
Ruta chapelensis	diarrhea
Ruta chapelensis	sedative
Ruta chapelensis	haemorrhoids
Ruta chapelensis	ecchymosis
Ruta chapelensis	inflammatory bowel disease
Ruta chapelensis	vertigo
Ruta chapelensis	vulnerary
Ruta chapelensis	analgesic
Ruta chapelensis	antiseptic
Ruta chapelensis	cough
Ruta chapelensis	nausea
Lavandula stoechas	ecchymosis
Lavandula stoechas	migraine
Lavandula stoechas	rheumatism
Lavandula stoechas	sedative
Lavandula stoechas	arthritis
Lavandula stoechas	sinusitis
Lavandula stoechas	osteoarthritis
Lavandula stoechas	halitosis
Lavandula stoechas	treat cardiovascular diseases
Lavandula stoechas	arthralgia
Lavandula angustifolia	catarrh
Lavandula angustifolia	bronchitis
Lavandula angustifolia	rheumatism
Lavandula angustifolia	sedative
Lavandula angustifolia	hypertension
Lavandula angustifolia	analgesic
Lavandula angustifolia	cough
Mentha pulegium	halitosis
Mentha pulegium	diarrhea
Mentha pulegium	vasodilator
Lilium pyrenaicum	hernia
Scrophularia auriculata	antiseptic
Lonicera biflora	cough
Lonicera biflora	asthma
Lonicera biflora	gingivitis
Psoralea bituminosa	diarrhea
Passiflora incarnata	circulatory
Passiflora incarnata	anxiety
Passiflora incarnata	hypercholesterolemia
Passiflora incarnata	allergy
Passiflora incarnata	sedative
Passiflora incarnata	hypertension
Passiflora incarnata	obesity
Passiflora incarnata	diabetes
Zingiber officinale	catarrh
Zingiber officinale	rhinitis
Zingiber officinale	pharyngitis
Zingiber officinale	asthma
Zingiber officinale	bronchitis
Zingiber officinale	benign prostatic hyperplasia
Zingiber officinale	weakness
Zingiber officinale	atherosclerosis
Zingiber officinale	myalgia
Zingiber officinale	vasoprotector
Zingiber officinale	migraine
Zingiber officinale	osteoarthritis
Zingiber officinale	fever
Zingiber officinale	hypertension
Zingiber officinale	against couperose
Zingiber officinale	rheumatism
Zingiber officinale	cough
Zingiber officinale	arthritis
Zingiber officinale	diabetes
Verbascum densiflorum	cough
Verbascum densiflorum	bronchitis
Verbascum densiflorum	otalgia
Verbascum densiflorum	diarrhea
Verbascum densiflorum	rhinitis
Verbascum densiflorum	burns
Smilax ornata	gout
Smilax ornata	arthritis
Smilax ornata	urethritis
Smilax ornata	cystitis
Smilax ornata	kidney stone
Smilax ornata	hypertension
Smilax ornata	nephritis
Smilax ornata	diuretic
Camellia sinensis	circulatory
Camellia sinensis	hyperlipidemia
Camellia sinensis	cardioprotector
Camellia sinensis	arthralgia
Camellia sinensis	hypercholesterolemia
Camellia sinensis	allergy
Camellia sinensis	diarrhea
Camellia sinensis	sedative
Camellia sinensis	vasoprotector
Camellia sinensis	venotonic
Camellia sinensis	treat cardiovascular diseases
Camellia sinensis	toothache
Camellia sinensis	osteoporosis
Camellia sinensis	depression
Camellia sinensis	vasodilator
Lavandula spica	catarrh
Lavandula spica	bronchitis
Lavandula spica	rheumatism
Lavandula spica	sedative
Lavandula spica	hypertension
Lavandula spica	analgesic
Aloe prolifera	catarrh
Aloe prolifera	inflammatory bowel disease
Digitalis purpurea	cardiotonic
Digitalis purpurea	against heart failure
Thea assamica	sedative
Thea assamica	arthralgia
Thea assamica	hypercholesterolemia
Thea assamica	allergy
Thea assamica	diarrhea
Thea assamica	hyperlipidemia
Thea assamica	toothache
Thea assamica	depression
Thea assamica	osteoporosis
Citrus aurantium	vasoprotector
Citrus aurantium	fever
Citrus aurantium	sedative
Prunus dulcis	otalgia
Prunus dulcis	sedative
Prunus dulcis	bronchitis
Prunus dulcis	osteoporosis
Quercus petraea	leukorrhea
Quercus petraea	gastroenteritis
Quercus petraea	antihemorrhagic
Quercus petraea	diarrhea
Quercus petraea	dysmenorrhea
Quercus petraea	gingivitis
Quercus petraea	gonorrhea
Quercus petraea	cough
Lonicera pyrenaica	cough
Lonicera pyrenaica	asthma
Lonicera pyrenaica	gingivitis
Erica terminalis	rheumatism
Erica terminalis	osteoarthritis
Erica terminalis	cystitis
Erica terminalis	urethritis
Erica terminalis	neoplasia
Mentha suaveolens	catarrh
Mentha suaveolens	gout
Mentha suaveolens	burns
Mentha suaveolens	halitosis
Mentha suaveolens	asthma
Mentha suaveolens	improve memorizing
Mentha suaveolens	bronchitis
Mentha suaveolens	migraine
Mentha suaveolens	rheumatism
Mentha suaveolens	pharyngitis
Mentha suaveolens	myalgia
Mentha suaveolens	fever
Mentha suaveolens	rhinitis
Mentha suaveolens	sinusitis
Mentha suaveolens	analgesic
Mentha suaveolens	toothache
Mentha suaveolens	cough
Mentha suaveolens	colic
Valeriana pyrenaica	anxiety
Valeriana pyrenaica	epilepsy
Valeriana pyrenaica	cough
Valeriana pyrenaica	sedative
Chamaespartium sagittale	analgesic
Plantago media	sedative
Plantago media	bronchitis
Plantago media	pharyngitis
Plantago media	allergy
Plantago media	diarrhea
Plantago media	cystitis
Plantago media	aphonia
Plantago media	toothache
Plantago media	burns
Plantago media	laryngitis
Lonicera etrusca	cough
Lonicera etrusca	asthma
Lonicera etrusca	gingivitis
Plantago lanceolata	sedative
Plantago lanceolata	hyperuricemia
Plantago lanceolata	bronchitis
Plantago lanceolata	pharyngitis
Plantago lanceolata	allergy
Plantago lanceolata	diarrhea
Plantago lanceolata	cystitis
Plantago lanceolata	aphonia
Plantago lanceolata	toothache
Plantago lanceolata	burns
Plantago lanceolata	laryngitis
Origanum vulgare	analgesic
Origanum vulgare	pharyngitis
Origanum vulgare	asthma
Origanum vulgare	sedative
Fraxinus angustifolia subsp angustifolia	cardioprotector
Fraxinus angustifolia subsp angustifolia	rheumatism
Fraxinus angustifolia subsp angustifolia	hypercholesterolemia
Fraxinus angustifolia subsp angustifolia	osteoarthritis
Fraxinus angustifolia subsp angustifolia	fever
Fraxinus angustifolia subsp angustifolia	hypertension
Fraxinus angustifolia subsp angustifolia	neoplasia
Fraxinus angustifolia subsp angustifolia	analgesic
Fraxinus angustifolia subsp angustifolia	obesity
Arbutus unedo	cardiotonic
Arbutus unedo	diarrhea
Arbutus unedo	urethritis
Arbutus unedo	cystitis
Arbutus unedo	hypertension
Arbutus unedo	toothache
Saponaria officinalis	psoriasis
Saponaria officinalis	jaundice
Tropaelum majus	asthma
Tropaelum majus	urethritis
Tropaelum majus	bronchitis
Rosmarinus officinalis	hypercholesterolemia
Rosmarinus officinalis	rhinitis
Rosmarinus officinalis	hypertension
Rosmarinus officinalis	venoprotector
Rosmarinus officinalis	depression
Rosmarinus officinalis	cardiotonic
Rosmarinus officinalis	migraine
Rosmarinus officinalis	rheumatism
Rosmarinus officinalis	antiinflammatory
Rosmarinus officinalis	analgesic
Rosmarinus officinalis	jaundice
Rosmarinus officinalis	catarrh
Rosmarinus officinalis	vasotonic
Rosmarinus officinalis	ecchymosis
Rosmarinus officinalis	arthritis
Rosmarinus officinalis	osteoarthritis
Rosmarinus officinalis	antiseptic
Rosmarinus officinalis	hypotension
Rosmarinus officinalis	improve memorizing
Rosmarinus officinalis	arthralgia
Rosmarinus officinalis	sedative
Rosmarinus officinalis	myalgia
Saxifraga paniculata	inflammatory bowel disease
Althaea officinalis	catarrh
Althaea officinalis	tonsillitis
Althaea officinalis	pharyngitis
Althaea officinalis	dyspepsia
Althaea officinalis	bronchitis
Althaea officinalis	sedative
Althaea officinalis	cystitis
Althaea officinalis	esophagitis
Althaea officinalis	toothache
Althaea officinalis	cough
Althaea officinalis	laryngitis
Althaea officinalis	aphonia
Crataegus monogyna	cardiotonic
Crataegus monogyna	atherosclerosis
Crataegus monogyna	increase myocardial blood flow
Crataegus monogyna	diarrhea
[truncated: 207 more rows]

## Sheet: DB plants-metabolites
Plant	Molecule_Name	InchiKey
Solanum lycopersicum	D-(+)-GALACTOSE	GZCGUPFRVQAUEE-KCDKBNATSA-N
Solanum lycopersicum	PUTRESCINE	KIDHWZJUCRJVML-UHFFFAOYSA-N
Solanum lycopersicum	MALTOSE	GUBGYTABKSRVRQ-YOLKTULGSA-N
Solanum lycopersicum	SUCROSE	CZMRCDWAGMRECN-GDQSFJPYSA-N
Solanum lycopersicum	SPERMIDINE	ATHGHQPFGPMSJY-UHFFFAOYSA-N
Solanum lycopersicum	TRYPTAMINE	APJYDQYYACXCRM-UHFFFAOYSA-N
Solanum lycopersicum	FUCOSE	PNNNRSAQSRJVSB-SLPGGIOYSA-N
Solanum lycopersicum	MYOINOSITOL	CDAISMWEOUEBRE-CDRYSYESSA-N
Solanum lycopersicum	MESO-ERYTHRITOL|ERYTHRITOL	UNXHWFMMPAWVPI-ZXZARUISSA-N
Solanum lycopersicum	RIBOSE	PYMYPHUHKUWMLA-LMVFSUKVSA-N
Solanum lycopersicum	TREHALOSE	HDTRYLNUVZCQOY-WSWWMNSNSA-N
Solanum lycopersicum	DOPAMINE	VYFYYTLLBUKUHU-UHFFFAOYSA-N
Solanum lycopersicum	APO-8'-LYCOPENAL	AQXFMDSHWVVBIM-DCLDNXSWSA-N
Solanum lycopersicum	TYRAMINE	DZGWFCGJZKJUFP-UHFFFAOYSA-N
Solanum lycopersicum	D-FRUCTOSE|FRUCTOSE	BJHIKXHVCXFQLS-UYFOZJQFSA-N
Solanum lycopersicum	GLYCINE|GLYCOCOLL	DHMQDGOQFOQNFH-UHFFFAOYSA-N
Hyssopus officinalis	1-(1,4-DIMETHYL-3-CYCLOHEXEN-1-YL)ETHANONE	BIUSXTISNNLMOR-JTQLQIEISA-N
Hyssopus officinalis	P-CYMENOL|CARVACROL	RECUKUPTGUEGMW-UHFFFAOYSA-N
Hyssopus officinalis	EUGENOL	RRAFCDWBNXTKKO-UHFFFAOYSA-N
Hyssopus officinalis	DELTA-CADINENE	FUCYIEXQVQJBKY-UKRRQHHQSA-N
Hyssopus officinalis	OCTAN-3-ONE|3-OCTANONE	RHLVCLIPMVJYKS-UHFFFAOYSA-N
Hyssopus officinalis	ELEMOL	GFJIQNADMLPFOW-ILWWEHDPSA-N
Hyssopus officinalis	BORNEOL|D-BORNEOL|(-)-BORNEOL|(+)-BORNEOL	DTGKSKDOIYIVQL-ZCUBBSJVSA-N
Hyssopus officinalis	HEXAN-2-ONE|2-HEXANONE	QQZOPKMRPOGIEB-UHFFFAOYSA-N
Hyssopus officinalis	GAMMA-CADINENE	WRHGORWNJGOVQY-KFWWJZLASA-N
Hyssopus officinalis	VERBENOL|TRANS-VERBENOL	WONIGEXYPVIKFS-VGMNWLOBSA-N
Hyssopus officinalis	OLEANOLIC-ACID	MIJYXULNPSFWEK-LXLHWSNGSA-N
Hyssopus officinalis	DELTA-3-CARENE|CAR-3-ENE|DELTA-CARENE|3-CARENE	BQOFWKZOCNGFEC-DTWKUNHWSA-N
Hyssopus officinalis	CIS-VERBENOL|TRANS-VERBENOL|VERBENOL	WONIGEXYPVIKFS-HRDYMLBCSA-N
Hyssopus officinalis	(-)-BETA-PINENE|BETA-PINENE|(-)-PINENE|PINENE	WTARULDDTDQWMU-IUCAKERBSA-N
Hyssopus officinalis	NEPETOIDIN-A	FOWPKLFOIDTRMY-YXPGJMBHSA-N
Hyssopus officinalis	LUTEIN|XANTHOPHYLL|LUTEIN-ESTER	KBPHJBAIARWVSC-DKLMTRRASA-N
Hyssopus officinalis	BORNEOL|L-BORNEOL|(-)-BORNEOL	DTGKSKDOIYIVQL-QXFUBDJGSA-N
Hyssopus officinalis	DIOSMETIN	MBNGWHIJMBWFHU-FIBGUPNXSA-N
Hyssopus officinalis	IONONE|IONENE|BETA-IONONE	PSQYTAPXSHCGMF-BQYQJAHWSA-N
Hyssopus officinalis	GURJUNENE|ALPHA-GURJUNENE	SPCXZDDGSGTVAW-XIDUGBJDSA-N
Hyssopus officinalis	SPATHULENOL	FRMCCTDTYSRUBE-ARUSPNSKSA-N
Hyssopus officinalis	BETA-PHELLANDRENE|(-)-BETA-PHELLANDRENE|PHELLANDRENE|(+)-BETA-PHELLANDRENE	LFJQCDVYDGGFCH-JTQLQIEISA-N
Hyssopus officinalis	BETA-THUJENE|THUJONE	USMNOWBWPHYOEA-VWHDNNRLSA-N
Hyssopus officinalis	CADINENE|ALPHA-CADINENE	QMAYBMKBYCGXDH-KKUMJFAQSA-N
Hyssopus officinalis	LEDOL	AYXPYQRXGNDJFU-KYDGKALRSA-N
Hyssopus officinalis	MENTH-1-EN-4-OL|4-TERPINEOL|TERPINEN-4-OL|TERPINENOL|TERPINEN-4-OL-METHYL-ETHER|1-TERPINEN-4-OL|TERPINEOL	WRYLYDPHFGVWKC-UHFFFAOYSA-N
Hyssopus officinalis	LEDOL	AYXPYQRXGNDJFU-AOWZIMASSA-N
Hyssopus officinalis	(-)-CAMPHOR|CAMPHOR	DSSYKIVIOFKYAU-OIBJUYFYSA-N
Hyssopus officinalis	BORNEOL|D-BORNEOL|(-)-BORNEOL	DTGKSKDOIYIVQL-WEDXCCLWSA-N
Hyssopus officinalis	D-MYRTENOL|D-MYRTENAL|MYRTENAL	KMRMUZKLFIEVAO-UHFFFAOYSA-N
Hyssopus officinalis	(-)-CARYOPHYLLENE|ALPHA-HUMULENE|ALPHA-CARYOPHYLLENE|HUMULENE	FAMPSKZZVDUYOS-HRGUGZIWSA-N
Hyssopus officinalis	TERPINENE|GAMMA-TERPINENE	YKFLAYDHMOASIY-UHFFFAOYSA-N
Hyssopus officinalis	HEDYCARYOL	SDMLCXJKAYFHQM-LIJSYYTGSA-N
Hyssopus officinalis	HEDYCARYOL	SDMLCXJKAYFHQM-MKJLVJGCSA-N
Hyssopus officinalis	BETA-ELEMENE|(-)-BETA-ELEMENE|ALPHA-ELEMENE|ELEMENE|BETAPELEMENE	OPFTUNCRGUEPRZ-UHFFFAOYSA-N
Hyssopus officinalis	(DL)-MALIC-ACID|MALIC-ACID	BJEPYKJPYRNKOW-UHFFFAOYSA-N
Hyssopus officinalis	TRANS-OCIMENE|(E)-OCIMENE|(Z)-BETA-OCIMENE|(E)-BETA-OCIMENE|TRANS-BETA-OCIMENE|BETA-OCIMENE|OCIMENE	IHPKGUQCSIINRJ-CSKARUKUSA-N
Hyssopus officinalis	GUM	UPSFMJHZUCSEHU-AZIUDTTLSA-N
Hyssopus officinalis	DL-TERPINEOL|D-ALPHA-TERPINEOL|TERPINENOL|ALPHA-TERPINEOL|D-TERPINEOL|I-TERPINEOL|TERPINEOL	WUOACPNHFRMFPN-UHFFFAOYSA-N
Hyssopus officinalis	ALPHA-AMORPHENE|ALPHA-CADINENE	QMAYBMKBYCGXDH-SOUVJXGZSA-N
Hyssopus officinalis	OCT-1-EN-3-OL|OCTEN-3-OL|1-OCTEN-3-OL	VSMOENVRRABVKN-UHFFFAOYSA-N
Hyssopus officinalis	TRANS-GERANIOL|GERANIOL|NEROL	GLZPCOQZEFWAFX-JXMROGBWSA-N
Hyssopus officinalis	GERMACRENE-D	GAIBLDCXCZKKJE-YZJXYJLZSA-N
Hyssopus officinalis	GAMMA-CADINENE	WRHGORWNJGOVQY-UHTQFYIKSA-N
Hyssopus officinalis	MYRCENE|ALPHA-MYRCENE	VYBREYKSZAROCT-UHFFFAOYSA-N
Hyssopus officinalis	TERPINOLENE|TERPINEOLENE|TERPINOLINE|P-MENTHA-1,4(8)-DIENE|ALPHA-TERPINOLENE	MOYAFQVGZZPNRA-UHFFFAOYSA-N
Hyssopus officinalis	THUJ-4(10)-ENE|SABINENE|THUJENE	NDVASEGYNIMXJL-UHFFFAOYSA-N
Hyssopus officinalis	TRANS-2-HEXENOL|TRANS-HEX-2-EN-1-OL|TRANS-HEXEN-1-OL	ZCHHRLHTBGRGOT-SNAWJCMRSA-N
Hyssopus officinalis	L-MALIC-ACID|MALIC-ACID	BJEPYKJPYRNKOW-REOHCLBHSA-N
Hyssopus officinalis	MYRTENIC-ACID	XPHVDOXZJRTIMV-UHFFFAOYSA-N
Hyssopus officinalis	ROSMARINOL|LABIATENIC-ACID|ROSMARINIC-ACID|ROSMARIC-ACID	DOUMFZQKYFQNTF-WUTVXBCWSA-N
Hyssopus officinalis	TERPINEOL-ACETATE|TERPINYL-ACETATE|ALPHA-TERPINENYL-ACETATE|ALPHA-TERPINYL-ACETATE	IGODOXYLBBXFDW-UHFFFAOYSA-N
Hyssopus officinalis	SAPONIN|AVENACIN-A-1	SYXUBXTYGFJFEH-UHFFFAOYSA-N
Hyssopus officinalis	URSOLIC-ACID|URSOLIC-ACID-I	WCGUUGGRBIKTOS-APYMDAETSA-N
Hyssopus officinalis	CIS-VERBENOL|VERBENOL	WONIGEXYPVIKFS-YIZRAAEISA-N
Hyssopus officinalis	MYRTEN-1-OL|D-MYRTENOL|CIS-MYRTENOL|(-)-MYRTENOL|MYRTENOL|TRANS-MYRTENOL	RXBQNMWIQKOSCS-UHFFFAOYSA-N
Hyssopus officinalis	THUJENE|ALPHA-THUJENE	KQAZVFVOEIRWHN-NXEZZACHSA-N
Hyssopus officinalis	1-(1,4-DIMETHYL-3-CYCLOHEXEN-1-YL)ETHANONE|4-ACETYL-1,4-DIMETHYL-1-CYCLOHEXENE	BIUSXTISNNLMOR-UHFFFAOYSA-N
Hyssopus officinalis	MUUROLINE|GAMMA-CADINENE|MUUROLENE|GAMMA-MUUROLENE	WRHGORWNJGOVQY-QLFBSQMISA-N
Hyssopus officinalis	CARVENE|L-LIMONENE|LIMONENE|(-)-LIMONENE|DIPENTENE	XMGQYMWWDOXHJM-SNVBAGLBSA-N
Hyssopus officinalis	GURJUNENE|ALPHA-GURJUNENE	SPCXZDDGSGTVAW-VXYFJCLZSA-N
Hyssopus officinalis	ALPHA-THUJENE	KQAZVFVOEIRWHN-UWVGGRQHSA-N
Hyssopus officinalis	BORNEOL|ISOBORNEOL|(-)-BORNEOL	DTGKSKDOIYIVQL-KHQFGBGNSA-N
Hyssopus officinalis	BETA-PHELLANDRENE|(-)-BETA-PHELLANDRENE|PHELLANDRENE|(+/-)-BETA-PHELLANDRENE|L-PHELLANDRENE	LFJQCDVYDGGFCH-SNVBAGLBSA-N
Hyssopus officinalis	ISOPINOCAMPHOME|ISOPINOCAMPHONE	MQPHVIPKLRXGDJ-PRJMDXOYSA-N
Hyssopus officinalis	HESPERIDIN	QUQPHWDTPGMPEX-QJBIFVCTSA-N
Hyssopus officinalis	IODINE	PNDPGZBMCMUPRI-UHFFFAOYSA-N
Hyssopus officinalis	BORNEOL|L-BORNEOL|(-)-BORNEOL	DTGKSKDOIYIVQL-NQMVMOMDSA-N
Hyssopus officinalis	BETA-ELEMENE|CYCLOHEXANE|(-)-BETA-ELEMENE|ELEMENE|BETAPELEMENE	OPFTUNCRGUEPRZ-QLFBSQMISA-N
Hyssopus officinalis	BETA-THUJENE|BETA-THUJONE|THUJONE	USMNOWBWPHYOEA-KHQFGBGNSA-N
Hyssopus officinalis	XANTHOPHYLL	KBPHJBAIARWVSC-JUUKCSAQSA-N
Hyssopus officinalis	(-)-PINOCAMPHEOL	REPVLJRCJUVQFA-LURQLKTLSA-N
Hyssopus officinalis	SPATHULENOL	FRMCCTDTYSRUBE-VOSWHAFNSA-N
Hyssopus officinalis	CAFFEIC-ACID|TRANS-CAFFEIC-ACID|DIHYDROXYCINNAMIC-ACID|3,4-DIHYDROXYCINNAMIC-ACID	QAIPRVGONGVQAS-DUXPYHPUSA-N
Hyssopus officinalis	BENZALDEHYDE	HUMNYLRZRPPJDN-UHFFFAOYSA-N
Hyssopus officinalis	BETA-CARYOPHYLLENE|CIS-CARYOPHYLLENE|(-)-CARYOPHYLLENE	NPNUFJAVOOONJE-WDZFZDKYSA-N
Hyssopus officinalis	CADINENE|(+)-GAMMA-CADINENE|GAMMA-CADINENE	WRHGORWNJGOVQY-KKUMJFAQSA-N
Hyssopus officinalis	BICYCLOGERMACRENE	VPDZRSSKICPUEY-BFPRWLMKSA-N
Hyssopus officinalis	BORNEOL	DTGKSKDOIYIVQL-OYNCUSHFSA-N
Hyssopus officinalis	PINOCARVONE	TZDMGBLPGZXHJI-UHFFFAOYSA-N
Hyssopus officinalis	ALPHA-PINENE|(-)-ALPHA-PINENE|(-)-PINENE|PINENE|1S,5S-(-)-ALPHA-PINENE	GRWFGVWFFZKLTI-IUCAKERBSA-N
Hyssopus officinalis	GAMMA-CADINENE	WRHGORWNJGOVQY-SLTAFYQDSA-N
Hyssopus officinalis	ALPHA-CAMPHENE|(+)-CAMPHENE|CAMPHENE|(-)-CAMPHENE	CRPUJAZIXJMDBK-DTWKUNHWSA-N
Hyssopus officinalis	BENZYL-ALCOHOL	WVDDGKGOMKODPV-UHFFFAOYSA-N
Hyssopus officinalis	OLEANOLIC-ACID	MIJYXULNPSFWEK-GTOFXWBISA-N
Hyssopus officinalis	(-)-SABINENE|SABINENE	NDVASEGYNIMXJL-UWVGGRQHSA-N
Hyssopus officinalis	PHYTOSTEROL|SITOSTEROL|GAMMA-SITOSTEROL|NIMBOSTEROL|BETA-SITOSTEROL|CLIONASTEROL	KZJWDPNRJALLNS-FBZNIEFRSA-N
Hyssopus officinalis	CHOLINE	OIPILFWXSMYKGL-UHFFFAOYSA-N
Hyssopus officinalis	BETA-CARYOPHYLLENE|(-)-ISOCARYOPHYLLENE|ISOCARYOPHYLLENE|(-)-CARYOPHYLLENE	NPNUFJAVOOONJE-FLFDDASRSA-N
Hyssopus officinalis	PHENYLETHANOL|BETA-PHENETHYL-ALCOHOL	WAPNOHKVXSQRPX-ZETCQYMHSA-N
Hyssopus officinalis	ALLO-AROMADENDRENE|(-)-ALLOAROMADENDRENE|AROMADENDRENE	ITYNGVSTWVVPIC-DHGKCCLASA-N
Hyssopus officinalis	AWOBANIN	HXWHJZIJSNBCJX-FDVUZUPYSA-O
Hyssopus officinalis	TRANS-PINOCARVEOL|(-)-TRANS-PINOCARVEOL	LCYXQUJDODZYIJ-AMDVSUOASA-N
Hyssopus officinalis	CADINENE|GAMMA-CADINENE	WRHGORWNJGOVQY-RBSFLKMASA-N
Hyssopus officinalis	HESPERIDIN	QUQPHWDTPGMPEX-UHFFFAOYSA-N
Hyssopus officinalis	BORNEOL|D-BORNEOL|(-)-BORNEOL	DTGKSKDOIYIVQL-SHTILUHOSA-N
Hyssopus officinalis	CUMINAL|CUMINALDEHYDE|4-ISOPROPYL-BENZALDEHYDE|CUMINIC-ALDEHYDE	WTWBUQJHJGUZCY-UHFFFAOYSA-N
Hyssopus officinalis	BORNEOL|L-BORNEOL|(-)-BORNEOL	DTGKSKDOIYIVQL-HKJUDDBKSA-N
Hyssopus officinalis	VERBENOL	WONIGEXYPVIKFS-HACHORDNSA-N
Hyssopus officinalis	LINALOL|LINALOOL|(-)-LINALOOL	CDOSHBSSFJOMGT-UHFFFAOYSA-N
Hyssopus officinalis	DIOSMIN	GZSOSUNBTXMUFQ-UHFFFAOYSA-N
Hyssopus officinalis	PINOCARVEOL	LCYXQUJDODZYIJ-YIZRAAEISA-N
Hyssopus officinalis	1-PHENYLETHANOL|PHENYLETHANOL|1-PHENYLETHYL-ALCOHOL|BETA-PHENETHYL-ALCOHOL	WAPNOHKVXSQRPX-UHFFFAOYSA-N
Hyssopus officinalis	NOPINONE	XZFDKWMYCUEKSS-RNFRBKRXSA-N
Hyssopus officinalis	MYRTENYL-ACETATE	BKATZVAUANSCKN-UHFFFAOYSA-N
Hyssopus officinalis	(+)-LIMONENE|(+)-S-CARVONE|LIMONENE|CARVENE|DIPENTENE|(-)-LIMONENE|D-LIMONENE	XMGQYMWWDOXHJM-JTQLQIEISA-N
Hyssopus officinalis	GERMACRENE-D	GAIBLDCXCZKKJE-BZXLUOIMSA-N
Hyssopus officinalis	ESTRAGOLE|METHYL-CHAVICOL|CHAVICOL-METHYL-ETHER|ESTRAGOL	ZFMSMUAANRJZFM-UHFFFAOYSA-N
Hyssopus officinalis	LIMONENE|LINONENE|L-LIMONENE|DIPENTENE|(-)-LIMONENE|(+)-MENTHA-1,8-DIENE|DL-LIMONENE|TERPINOLENE	XMGQYMWWDOXHJM-UHFFFAOYSA-N
Hyssopus officinalis	(-)-BETA-PINENE|BETA-PINENE|(+)-BETA-PINENE	WTARULDDTDQWMU-RKDXNWHRSA-N
Hyssopus officinalis	MYRTENIC-ACID-METHYL-ESTER	AXVCIMAKGFTGCZ-UHFFFAOYSA-N
Hyssopus officinalis	CINEOL|1,4-CINEOLE|CINEOLE	RFFOTVCVTJUTAD-UHFFFAOYSA-N
Hyssopus officinalis	ALLO-AROMADENDRENE|AROMADENDRENE	ITYNGVSTWVVPIC-LRUBOHGLSA-N
Hyssopus officinalis	DELTA-CARENE|3-CARENE|(-)-CARENE(-)-3-CARENE	BQOFWKZOCNGFEC-BDAKNGLRSA-N
Hyssopus officinalis	(1S,2R,5R)-3-PINANONE|PINOCAMPHONE	MQPHVIPKLRXGDJ-UHFFFAOYSA-N
Hyssopus officinalis	HEDYCARYOL	SDMLCXJKAYFHQM-CPZSWDPFSA-N
Hyssopus officinalis	PINOCAMPHEOL	REPVLJRCJUVQFA-MDVIFZSFSA-N
Hyssopus officinalis	MALVIDIN-3-(6''-P-COUMARYLGLUCOSIDE)-5-DIMALONYLGLUCOSIDE	WLRHEJRFVKWTOH-LIEQFREDSA-O
Hyssopus officinalis	BORNYL-ACETATE	KGEKLUUHTZCSIP-SCVCMEIPSA-N
Hyssopus officinalis	VERBENOL	WONIGEXYPVIKFS-UHFFFAOYSA-N
Hyssopus officinalis	THUJONE|ALPHA-THUJONE|ALPHA-BETA-THUJONE	USMNOWBWPHYOEA-UHFFFAOYSA-N
Hyssopus officinalis	ALPHA-PHELLANDRENE|PHELLANDRENE|L-PHELLANDRENE	OGLDWXZKYODSOB-SNVBAGLBSA-N
Hyssopus officinalis	BETA-MYRCENE|MYRCENE	UAHWPYUMFXYFJY-UHFFFAOYSA-N
Hyssopus officinalis	OLEANOLIC-ACID	AOWMBRPPHGNFDX-HPPBOAITSA-N
Hyssopus officinalis	DIOSMETIN	MBNGWHIJMBWFHU-KQORAOOSSA-N
Hyssopus officinalis	SPATHULENOL	FRMCCTDTYSRUBE-UHFFFAOYSA-N
Hyssopus officinalis	CALAMENENE|CIS-CALAMENENE	PGTJIOWQJWHTJJ-STQMWFEESA-N
Hyssopus officinalis	TERPINEN-4-OL|4-TERPINEOL	WRYLYDPHFGVWKC-SNVBAGLBSA-N
Hyssopus officinalis	ALPHA-PINENE|L-ALPHA-PINENE|(-)-PINENE|PINENE|(-)-ALPHA-PINENE	GRWFGVWFFZKLTI-UHFFFAOYSA-N
Hyssopus officinalis	(-)-BETA-PINENE|BETA-PINENE|(-)-PINENE|PINENE	WTARULDDTDQWMU-UHFFFAOYSA-N
Hyssopus officinalis	BETA-SITOSTEROL|GAMMA-SITOSTEROL	KZJWDPNRJALLNS-UHFFFAOYSA-N
Hyssopus officinalis	MYO-INOSITOL|L-INOSITOL|MESO-INOSITOL|CHIRO-INOSITOL|SCYLLITOL|INOSITOL	CDAISMWEOUEBRE-UHFFFAOYSA-N
Hyssopus officinalis	L-CAMPHENE|CAMPHENE|(-)-CAMPHENE	CRPUJAZIXJMDBK-UHFFFAOYSA-N
Hyssopus officinalis	BETA-SITOSTEROL	KZJWDPNRJALLNS-GDQWMHGZSA-N
Hyssopus officinalis	FUFURAL|FURALDEHYDE|FUR-2-ALDEHYDE|FURFURAL	HYBBIBNJHNGZAN-UHFFFAOYSA-N
Hyssopus officinalis	DIOSMETIN|5,7,3'-TRIHYDROXY-4'-METHOXYFLAVONE	MBNGWHIJMBWFHU-UHFFFAOYSA-N
Hyssopus officinalis	DELTA-CADINENE|CADINENE|D-CADINENE	FUCYIEXQVQJBKY-ZFWWWQNUSA-N
Hyssopus officinalis	CIS-PINONIC-ACID	SIZDUQQDBXJXLQ-SFYZADRCSA-N
Hyssopus officinalis	METHYL-EUGENOL|METHYLEUGENOL|EUGENOL-METHYL-ETHER	ZYEMGPIYFIJGTP-UHFFFAOYSA-N
Hyssopus officinalis	ISOTHUJONE|THUJONE|ALPHA-THUJONE	USMNOWBWPHYOEA-XKSSXDPKSA-N
Hyssopus officinalis	BORNEOL|ISOBORNEOL|(-)-BORNEOL	DTGKSKDOIYIVQL-CCNFQMFXSA-N
Hyssopus officinalis	METHYL-SALICYLATE|SALICYLIC-ACID-METHYL-ESTER	OSWPMRLSEDHDFF-UHFFFAOYSA-N
Hyssopus officinalis	URSOLIC-ACID|URSOLIC-ACID-I|BETA-URSOLIC-ACID	WCGUUGGRBIKTOS-GPOJBZKASA-N
Hyssopus officinalis	DIOSMETIN-7-RUTINOSIDE|DIOSMIN	GZSOSUNBTXMUFQ-YFAPSIMESA-N
Hyssopus officinalis	LINALOOL|(-)-LINALOOL|(R)-LINALOOL|L-LINALOOL	CDOSHBSSFJOMGT-JTQLQIEISA-N
Hyssopus officinalis	N-TETRADECANE|TETRADECANE	BGHCVCJVXZWKCC-UHFFFAOYSA-N
Hyssopus officinalis	CIS-PINONIC-ACID	SIZDUQQDBXJXLQ-JGVFFNPUSA-N
Hyssopus officinalis	BORNEOL|ISOBORNEOL|(-)-BORNEOL	DTGKSKDOIYIVQL-UHFFFAOYSA-N
Hyssopus officinalis	LUTEIN|XANTHOPHYLL|LUTEIN-ESTER	KBPHJBAIARWVSC-RTIVXWJOSA-N
Hyssopus officinalis	THUJONE|ALPHA-THUJONE|(-)-3-ISOTHUJONE	USMNOWBWPHYOEA-MRTMQBJTSA-N
Hyssopus officinalis	BETA-CARYOPHYLLENE|TRANS-CARYOPHYLLENE|ISOCARYOPHYLLENE|(E)-CARYOPHYLLENE|(-)-CARYOPHYLLENE	NPNUFJAVOOONJE-GFUGXAQUSA-N
Hyssopus officinalis	BORNYL-ACETATE|L-BORNYL-ACETATE|BORNEOL-ACETATE|(-)-BORNEOL-ACETATE	KGEKLUUHTZCSIP-HOSYDEDBSA-N
Hyssopus officinalis	TRANS-PINOCARVEOL	LCYXQUJDODZYIJ-VGMNWLOBSA-N
Hyssopus officinalis	D-CAMPHOR|CAMPHOR	DSSYKIVIOFKYAU-UHFFFAOYSA-N
Hyssopus officinalis	PINOCAMPHONE	MQPHVIPKLRXGDJ-BIIVOSGPSA-N
Hyssopus officinalis	SPATHULENOL	FRMCCTDTYSRUBE-BGPZULBFSA-N
Hyssopus officinalis	ALPHA-CAMPHENE|L-CAMPHENE|CAMPHENE|(-)-CAMPHENE	CRPUJAZIXJMDBK-BDAKNGLRSA-N
Hyssopus officinalis	2-PHENYLETHANOL|BETA-PHENETHYL-ALCOHOL|BETA-PHENYLETHANOL|PHENETHYL-ALCOHOL|BETA-PHENYLETHYLALCOHOL|2-PHENYLETHAN-1-OL|2-PHENYLETHYL-ALCOHOL|PHENYL-ETHYL-ALCOHOL|PHENYLETHANOL	WRMNZCZEMHIOCP-UHFFFAOYSA-N
Hyssopus officinalis	XANTHOPHYLL	KBPHJBAIARWVSC-WGDSMFBMSA-N
Hyssopus officinalis	ASCORBIC-ACID	TYQCGQRIZGCHNB-MVHIGOERSA-N
Hyssopus officinalis	BETA-CARYOPHYLLENE|(E)-CARYOPHYLLENE|(-)-CARYOPHYLLENE	NPNUFJAVOOONJE-IZZDOVSWSA-N
Hyssopus officinalis	BURSINE|CHOLINE	OEYIOHPDSNJKLS-UHFFFAOYSA-N
Hyssopus officinalis	URSOLIC-ACID|URSOLIC-ACID-I	WCGUUGGRBIKTOS-UHFFFAOYSA-N
Hyssopus officinalis	NOPINONE|BETA-PINONE	XZFDKWMYCUEKSS-UHFFFAOYSA-N
Hyssopus officinalis	I-TERPINEOL|GAMMA-TERPINEOL|TERPINEOL|P-MENTH-4(8)-EN-1-OL	NNRLDGQZIVUQTE-UHFFFAOYSA-N
Hyssopus officinalis	MYRTENAL	KMRMUZKLFIEVAO-IUCAKERBSA-N
Hyssopus officinalis	FERULIC-ACID|TRANS-FERULIC-ACID	KSEBMYQBYZTDHS-HWKANZROSA-N
Hyssopus officinalis	VANILLIN|P-VANILLIN|VANNILALDEHYDE	MWOOGOJBHIARFG-UHFFFAOYSA-N
Hyssopus officinalis	THYMOL|P-CYMENOL	MGSRCZKZVOBKFT-UHFFFAOYSA-N
Hyssopus officinalis	MARRUBIIN|MARRUBINE	HQLLRHCTVDVUJB-UHFFFAOYSA-N
Hyssopus officinalis	CRYPTONE	AANMVENRNJYEMK-UHFFFAOYSA-N
Hyssopus officinalis	ALPHA-TERPINENE|TERPINENE|MENTHA-1,3-DIENE	YHQGMYUVUMAZJR-UHFFFAOYSA-N
Hyssopus officinalis	VERBENOL|TRANS-VERBENOL	WONIGEXYPVIKFS-HLTSFMKQSA-N
Hyssopus officinalis	CIRSILINEOL	VKOSQMWSWLZQPA-UHFFFAOYSA-N
Hyssopus officinalis	GERMACRENE-D|(-)-GERMACRENE-D	GAIBLDCXCZKKJE-RXJOXMPGSA-N
Hyssopus officinalis	TIBOUCHININ	KGEHZUCHEKVXEU-GRFZEYSCSA-O
Hyssopus officinalis	METHYL-MYRTENATE	HBIHNNBZGOVTTR-UHFFFAOYSA-N
Hyssopus officinalis	(+)-CAMPHOR|D-CAMPHOR|CAMPHOR	DSSYKIVIOFKYAU-XCBNKYQSSA-N
Hyssopus officinalis	I-TERPINEOL|TERPINEOL|ALPHA-TERPINEOL	WUOACPNHFRMFPN-VIFPVBQESA-N
Hyssopus officinalis	OCIMENE|(Z)-OCIMENE|CIS-BETA-OCIMENE|CIS-OCIMENE|(Z)-BETA-OCIMENE	IHPKGUQCSIINRJ-NTMALXAHSA-N
Hyssopus officinalis	BETA-EUDESMOL|BETA-SELINENOL|EUDESMOL	BOPIMTNSYWYZOC-VNHYZAJKSA-N
Hyssopus officinalis	P-CYMOL|P-CYMENE|CYMOL	HFPZCAJZSCWRBC-UHFFFAOYSA-N
Hyssopus officinalis	CIS-PINONIC-ACID	SIZDUQQDBXJXLQ-UHFFFAOYSA-N
Hyssopus officinalis	ISOPINOCARVEOL|TRANS-PINOCARVEOL|(-)-TRANS-PINOCARVEOL|PINOCARVEOL	LCYXQUJDODZYIJ-UHFFFAOYSA-N
Hyssopus officinalis	NEROLIDOL|TRANS-NEROLIDOL|ALPHA-NEROLIDOL	FQTLCLSUCSAZDY-SDNWHVSQSA-N
Hyssopus officinalis	3-HEXEN-1-OL|HEX-3-EN-1-OL|TRANS-3-HEXENOL|TRANS-HEXEN-1-OL|HEX-TRANS-3-EN-1-OL|HEX-TRANS-3-EN-OL	UFLHIIWVXFIJGU-ONEGZZNKSA-N
Hyssopus officinalis	VERBENOL|TRANS-VERBENOL	WONIGEXYPVIKFS-ZAZKALAHSA-N
Hyssopus officinalis	DIMALONYLAWOBANIN	LVWQQRKFDAHVIR-ZUTLIKDLSA-O
Hyssopus officinalis	(+)-BICYCLOGERMACRENE|BICYCLOGERMACRENE	VPDZRSSKICPUEY-JEPMYXAXSA-N
Hyssopus officinalis	THUJENE|ALPHA-THUJENE	KQAZVFVOEIRWHN-RGURZIINSA-N
Hyssopus officinalis	SABINENE|(+)-SABINENE|4(10)-THUJENE	NDVASEGYNIMXJL-NXEZZACHSA-N
Hyssopus officinalis	CADINENE|GAMMA-CADINENE|GAMMA-MUUROLENE	WRHGORWNJGOVQY-UHFFFAOYSA-N
Hyssopus officinalis	(-)-ALPHA-PHELLANDRENE|ALPHA-PHELLANDRENE|PHELLANDRENE|MENTHA-1,3-DIENE|L-PHELLANDRENE	OGLDWXZKYODSOB-UHFFFAOYSA-N
Hyssopus officinalis	LEDOL	AYXPYQRXGNDJFU-PVZBEVCSSA-N
Hyssopus officinalis	VANILLIN|O-VANILLIN	JJVNINGBHGBWJH-UHFFFAOYSA-N
Hyssopus officinalis	GLOBULOL|VIRIDIFLOROL|EPIGLOBULOL|LEDOL	AYXPYQRXGNDJFU-UHFFFAOYSA-N
Hyssopus officinalis	LINALOOL|(-)-LINALOOL|(+)-LINALOOL|S-(+)-LINALOOL	CDOSHBSSFJOMGT-SNVBAGLBSA-N
Hyssopus officinalis	N-NONANOIC-ACID|NONANOIC-ACID|PELARGONIC-ACID	FBUKVWPVBMHYJY-UHFFFAOYSA-N
Hyssopus officinalis	I-TERPINEOL|TERPINEOL|ALPHA-TERPINEOL	WUOACPNHFRMFPN-SECBINFHSA-N
Hyssopus officinalis	DIOSMIN	GZSOSUNBTXMUFQ-IQFYTUTQSA-N
Hyssopus officinalis	ELEMOL	GFJIQNADMLPFOW-VNHYZAJKSA-N
Hyssopus officinalis	PHENYLETHANOL	WAPNOHKVXSQRPX-SSDOTTSWSA-N
Hyssopus officinalis	BORNYL-ACETATE|ISOBORNYL-ACETATE	KGEKLUUHTZCSIP-UHFFFAOYSA-N
Hyssopus officinalis	OCTAN-3-OL|OCTANOL|3-OCTANOL	NMRPBPVERJPACX-UHFFFAOYSA-N
Hyssopus officinalis	TRANS-BETA-TERPINEOL|CIS-BETA-TERPINEOL|I-TERPINEOL|BETA-TERPINEOL|TERPINEOL|P-MENTH-8-EN-1-OL	RUJPNZNXGCHGID-UHFFFAOYSA-N
Hyssopus officinalis	CAR-3-ENE|DELTA-CARENE|3-CARENE|DELTA-CAR-3-ENE	BQOFWKZOCNGFEC-UHFFFAOYSA-N
Hyssopus officinalis	(-)-PINENE|(+)-PINENE|ALPHA-PINENE|(+)-ALPHA-PINENE|L-ALPHA-PINENE|PINENE|(-)-ALPHA-PINENE|1R,5R-(+)-ALPHA-PINENE	GRWFGVWFFZKLTI-RKDXNWHRSA-N
Hyssopus officinalis	T-CADINOL|CADINOL	LHYHMMRYTDARSZ-XQLPTFJDSA-N
Hyssopus officinalis	BETA-PHELLANDRENE|(-)-BETA-PHELLANDRENE|PHELLANDRENE|L-PHELLANDRENE	LFJQCDVYDGGFCH-UHFFFAOYSA-N
Hyssopus officinalis	L-ASCORBIC-ACID|ASCORBIC-ACID	TYQCGQRIZGCHNB-JLAZNSOCSA-N
Hyssopus officinalis	MUUROLINE|GAMMA-CADINENE|MUUROLENE	WRHGORWNJGOVQY-WLYUNCDWSA-N
Hyssopus officinalis	LEDOL	AYXPYQRXGNDJFU-JDQINNIXSA-N
Hyssopus officinalis	ELEUTHEROSIDE-B-1|D-TERPINEOL|SYRINGIN|SYRINGOSIDE	QJVXKWHHAMZTBY-GCPOEHJPSA-N
Hyssopus officinalis	1,8-CINEOLE	WEEGYLXZBRQIMU-WAAGHKOSSA-N
Hyssopus officinalis	PHYTOSTEROL|SITOSTEROL|GAMMA-SITOSTEROL|NIMBOSTEROL|BETA-SITOSTEROL|SITOSTEROL-6'-LINOLYLGLUCOSIDE|(-)-BETA-SITOSTEROL	KZJWDPNRJALLNS-VJSFXXLFSA-N
Hyssopus officinalis	EUCALYPTOL|CINEOL|1,8-CINEOL|CINEOLE|1,8-CINEOLE	WEEGYLXZBRQIMU-UHFFFAOYSA-N
Hyssopus officinalis	NEPETOIDIN-B	GFZFUVWXGQWUGX-DGEKEWMVSA-N
Hyssopus officinalis	1-HEXANOL|N-HEXANOL|N-HEXYL-ALCOHOL|HEXAN-1-OL|HEXANOL|N-HEXENOL(?)	ZSIAUFGUXNUGDI-UHFFFAOYSA-N
Hyssopus officinalis	THUJONE|ALPHA-THUJONE	USMNOWBWPHYOEA-NRPADANISA-N
Hyssopus officinalis	MARRUBIIN|MARRUBINE	HQLLRHCTVDVUJB-OBHOOXMTSA-N
Hyssopus officinalis	GERANIOL|NEROL	GLZPCOQZEFWAFX-YFHOEESVSA-N
Hyssopus officinalis	HESPERIDIN|HESPERITIN-7-RUTINOSIDE	QUQPHWDTPGMPEX-RBSJMJCGSA-N
Cannabis sativa	CANNABIDIOLIC-ACID	WVOLTBSCXRRQFR-DLBZAZTESA-N
Cannabis sativa	EUGENOL	RRAFCDWBNXTKKO-UHFFFAOYSA-N
Cannabis sativa	DELTA-CADINENE	FUCYIEXQVQJBKY-UKRRQHHQSA-N
Cannabis sativa	ASPARTIC-ACID	CKLJMWTZIZZHCS-UHFFFAOYSA-N
Cannabis sativa	MUUROLINE|GAMMA-CADINENE|MUUROLENE	WRHGORWNJGOVQY-WLYUNCDWSA-N
Cannabis sativa	ANEURINE|THIAMINE|THIAMIN|VITAMIN-B-1|VIT-B-1	JZRWCGZRTZMZEH-UHFFFAOYSA-N
Cannabis sativa	BORNEOL|D-BORNEOL|(-)-BORNEOL|(+)-BORNEOL	DTGKSKDOIYIVQL-ZCUBBSJVSA-N
Cannabis sativa	CANNABISIN-E	RMSITXIMTOOGNZ-ISUJAHSRSA-N
Cannabis sativa	WATER	XLYOFNOQVPJJNP-UHFFFAOYSA-N
Cannabis sativa	CANNABIDIOL|CANNIBIDIOL	QHMBSVQNZZTUGM-ZWKOTPCHSA-N
Cannabis sativa	NIACIN|NICOTINIC-ACID	PVNIIMVLHYAWGP-UHFFFAOYSA-N
Cannabis sativa	L-ASPARTIC-ACID|ASPARTIC-ACID|ASPARAGIC-ACID|ASPARAGINIC-ACID	CKLJMWTZIZZHCS-REOHCLBHSA-N
Cannabis sativa	MUSCARINE	UQOFGTXDASPNLL-XHNCKOQMSA-N
Cannabis sativa	SODIUM-OXIDE	MPMYQQHEHYDOCL-UHFFFAOYSA-N
Cannabis sativa	ALPHA-CANNABISPIRANOL	ZFFYHYZOCYEEPL-WGRBQBNCSA-N
Cannabis sativa	BORNEOL|L-BORNEOL|(-)-BORNEOL	DTGKSKDOIYIVQL-QXFUBDJGSA-N
Cannabis sativa	BETA-CAROTENE|ZETA-CAROTENE	BIWLELKAFXRPDE-WTXAYMOSSA-N
Cannabis sativa	CALCIUM-OXIDE	ODINCKMPIJJUCX-UHFFFAOYSA-N
Cannabis sativa	(-)-CAMPHOR|CAMPHOR	DSSYKIVIOFKYAU-OIBJUYFYSA-N
Cannabis sativa	BORNEOL|D-BORNEOL|(-)-BORNEOL	DTGKSKDOIYIVQL-WEDXCCLWSA-N
Cannabis sativa	3,4'-DIHYDROXY-5-METHOXYBIBENZYL	NSBYGUHECONSDC-UHFFFAOYSA-N
Cannabis sativa	OXYPROLINE|HYDROXYPROLINE	PMMYEEVYMWASQN-DMTCNVIQSA-N
Cannabis sativa	ALANINE	QNAYBMKLOCPYGJ-UWTATZPHSA-N
Cannabis sativa	IRON-OXIDE|IRON	XEEYBQQBJWHFJM-UHFFFAOYSA-N
Cannabis sativa	ARABITOL	HEBKCHPVOIAQTA-UHFFFAOYSA-N
Cannabis sativa	CANNABISPIRONE|CANABISPIRAN	WSWHSHJDUZRVPR-UHFFFAOYSA-N
Cannabis sativa	BENZYL-ACETATE	QUKGYYKBILRGFE-UHFFFAOYSA-N
Cannabis sativa	GAMMA-CADINENE	WRHGORWNJGOVQY-UHTQFYIKSA-N
Cannabis sativa	OXYPROLINE|HYDROXYPROLINE	PMMYEEVYMWASQN-IMJSIDKUSA-N
Cannabis sativa	VIT-B2|RIBOFLAVIN|VITAMIN-B-2	AUNGANRZJHBGPY-SCRDCRAPSA-N
Cannabis sativa	CANNABICHROMENE	UVOLYTDXHDXWJU-NRFANRHFSA-N
Cannabis sativa	ASPARTIC-ACID	CKLJMWTZIZZHCS-UWTATZPHSA-N
Cannabis sativa	ALPHA-LINOLEIC-ACID|LINOLEIC-ACID	OYHQOLUKZRVURQ-HZJYTTRNSA-N
Cannabis sativa	ALPHA-TRANS-BERGAMOTENE|BERGAMOTENE|ALPHA-BERGAMOTENE	YMBFCQPIMVLNIU-UHFFFAOYSA-N
Cannabis sativa	SILICON-OXIDE|SILICA|SILICON-DIOXIDE	CCCMJDROUGPJNR-UHFFFAOYSA-N
Cannabis sativa	DELTA-9-TETRAHYDROCANNABINOL|TETRAHYDROCANNABINOL	CYQFCXCEBYINGO-UHFFFAOYSA-N
Cannabis sativa	POTASSIUM|POTASSIUM-OXIDE|POTASSIUM-CHLORIDE|K2O	NTTOTNSKUYCDAV-UHFFFAOYSA-N
Cannabis sativa	MAGNESIUM-OXIDE	CPLXHLVBOLITMK-UHFFFAOYSA-N
Cannabis sativa	CANNABIELSOIN	RBEAVAMWZAJWOI-MTOHEIAKSA-N
Cannabis sativa	ACETALDEHYDE	IKHGUXGNUITLKF-UHFFFAOYSA-N
Cannabis sativa	MYRICETIN-3'-GLUCOSIDE	ZJYAVUPWMNHHEU-QPNURLTJSA-N
Cannabis sativa	ISOCANNABISPIRAN	ZKJMXTKGSQHXEC-UHFFFAOYSA-N
Cannabis sativa	CANNABISPIRADIENONE	LYSXDJPKAGMDNO-UHFFFAOYSA-N
Cannabis sativa	ARABITOL	HEBKCHPVOIAQTA-QWWZWVQMSA-N
Cannabis sativa	P-ETHYLBENZALDEHYDE	QNGNSVIICDLXHT-UHFFFAOYSA-N
Cannabis sativa	BORNEOL|D-BORNEOL|(-)-BORNEOL	DTGKSKDOIYIVQL-SHTILUHOSA-N
Cannabis sativa	ALLO-AROMADENDRENE|(-)-ALLOAROMADENDRENE|AROMADENDRENE	ITYNGVSTWVVPIC-DHGKCCLASA-N
Cannabis sativa	EPI-ALPHA-BISABOLOL|BISABOLOL|ALPHA-BISABOLOL	RGZSQWQPBWRIAQ-UHFFFAOYSA-N
Cannabis sativa	MUUROLINE|GAMMA-CADINENE|MUUROLENE|GAMMA-MUUROLENE	WRHGORWNJGOVQY-QLFBSQMISA-N
Cannabis sativa	RIBOFLAVIN|VITAMIN-B-2	AUNGANRZJHBGPY-UHFFFAOYSA-N
Cannabis sativa	BORNEOL|L-BORNEOL|(-)-BORNEOL	DTGKSKDOIYIVQL-NQMVMOMDSA-N
Cannabis sativa	BORNEOL|ISOBORNEOL|(-)-BORNEOL	DTGKSKDOIYIVQL-KHQFGBGNSA-N
Cannabis sativa	ORIENTIN	PLAPMLGJVGLZOV-UHFFFAOYSA-N
Cannabis sativa	4-HYDROXYBENZOIC-ACID-METHYL-ESTER|METHYL-4-HYDROXYBENZOATE	LXCFILQKKLGQFO-UHFFFAOYSA-N
Cannabis sativa	CAMPHENE-HYDRATE	PXRCIOIWVGAZEP-UHFFFAOYSA-N
Cannabis sativa	BISABOLENE|DELTA-BISABOLENE	NGIVKZGKEPRIGG-UHFFFAOYSA-N
Cannabis sativa	ALPHA-CIS-BERGAMOTENE|ALPHA-BERGAMOTENE	YMBFCQPIMVLNIU-KKUMJFAQSA-N
Cannabis sativa	OLEIC-ACID	ZQPPMHVWECSIRJ-KTKRTIGZSA-N
Cannabis sativa	ARABINOSE	PYMYPHUHKUWMLA-DEOSMSJNSA-N
Cannabis sativa	GAMMA-BISABOLENE|BISABOLENE	XBGUIVFBMBVUEG-CCEZHUSRSA-N
Cannabis sativa	BISABOLOL|ALPHA-BISABOLOL	RGZSQWQPBWRIAQ-CABCVRRESA-N
Cannabis sativa	CAMPEST-4-EN-3-ONE	QQIOPZFVTIHASB-PRHUNDBKSA-N
Cannabis sativa	TRYPTOPHAN|L-(-)-TRYPTOPHAN	QIVBCDIJIAJPQS-SECBINFHSA-N
Cannabis sativa	CANNABISATIVINE	KZZKPJBKEJKNAK-HUUJSLGLSA-N
Cannabis sativa	3-METHYL-1-(1-METHYLETHENYL)-3-CYCLOHEXEN-1-OL	WQABFSITNCYDBD-JTQLQIEISA-N
Cannabis sativa	DIHYDRORESVERATROL	HITJFUSPLYBJPE-UHFFFAOYSA-N
Cannabis sativa	CANNITHRENE-1	PLHFLFWGPBWZHL-UHFFFAOYSA-N
Cannabis sativa	CAMPESTEROL	SGNBVLSWZMBQTH-ZRUUVFCLSA-N
Cannabis sativa	ORIENTIN	PLAPMLGJVGLZOV-VPRICQMDSA-N
Cannabis sativa	CADINENE|(+)-GAMMA-CADINENE|GAMMA-CADINENE	WRHGORWNJGOVQY-KKUMJFAQSA-N
Cannabis sativa	CANNABISIN-B	XENYXHLAFMZULS-ACHIHNKUSA-N
Cannabis sativa	BORNEOL	DTGKSKDOIYIVQL-OYNCUSHFSA-N
Cannabis sativa	GAMMA-CADINENE	WRHGORWNJGOVQY-SLTAFYQDSA-N
Cannabis sativa	ALPHA-CAMPHENE|(+)-CAMPHENE|CAMPHENE|(-)-CAMPHENE	CRPUJAZIXJMDBK-DTWKUNHWSA-N
Cannabis sativa	L-ARGININE|ARGININE	ODKSFYDXXFIFQN-BYPYZUCNSA-N
Cannabis sativa	TRANS-GAMMA-BISABOLENE|BISABOLENE	HLXYVONWCAIOIR-UKRRQHHQSA-N
Cannabis sativa	DELTA-1-TETRAHYDROCANNABINOL|TETRAHYDROCANNABINOL	CYQFCXCEBYINGO-IAGOWNOFSA-N
Cannabis sativa	CANNABISIN-A	CLNINZAIEQRASP-UHFFFAOYSA-N
Cannabis sativa	CANNABIDIOL|CANNIBIDIOL	QHMBSVQNZZTUGM-ZENAZSQFSA-N
Cannabis sativa	BERGAMOTENE|ALPHA-BERGAMOTENE	YMBFCQPIMVLNIU-ZYOSVBKOSA-N
Cannabis sativa	CADINENE|GAMMA-CADINENE	WRHGORWNJGOVQY-RBSFLKMASA-N
Cannabis sativa	D-ARABINOSE|ARABINOSE|L-ARABINOSE	SRBFZHDQGSBBOR-UHFFFAOYSA-N
Cannabis sativa	CANNFLAVIN-B	IXCUTZUASDSIJO-UHFFFAOYSA-N
Cannabis sativa	ARACHIDIC-ACID	VKOBVWXKNCXXDE-UHFFFAOYSA-N
Cannabis sativa	ACETONE	CSCPPACGZOOCGX-UHFFFAOYSA-N
Cannabis sativa	BORNEOL|L-BORNEOL|(-)-BORNEOL	DTGKSKDOIYIVQL-HKJUDDBKSA-N
Cannabis sativa	D-ARABINOSE|ARABINOSE|XYLOSE|PENTOSE	PYMYPHUHKUWMLA-VAYJURFESA-N
Cannabis sativa	CANNABISPIRENONE-B	INYHBBQIKOOHDX-OAHLLOKOSA-N
Cannabis sativa	GLUCOSAMINE|D-GLUCOSAMINE	MSWZFWKMSRAUBD-GQNBSWLHSA-N
Cannabis sativa	DELTA-1-TETRAHYDROCANNABINOL|TETRAHYDROCANNABINOL	CYQFCXCEBYINGO-IRXDYDNUSA-N
Cannabis sativa	BETA-CANNABISPIRANOL	ZFFYHYZOCYEEPL-FUKZOUPISA-N
Cannabis sativa	ALPHA-ALANINE|ALANINE|L-ALANINE	QNAYBMKLOCPYGJ-UHFFFAOYSA-N
Cannabis sativa	ASCORBIC-ACID	TYQCGQRIZGCHNB-MVHIGOERSA-N
Cannabis sativa	LINALYL-OXIDE|LINALOOL-OXIDE-A	BRHDDEIRQPDPMG-SCZZXKLOSA-N
Cannabis sativa	4,5-DIHYDROXY-3,7-DIMETHOXY-9,10-DIHYDROPHENANTHRENE	JOPGVVOTXYNMIS-UHFFFAOYSA-N
Cannabis sativa	1,4-CINEOLE	RFFOTVCVTJUTAD-AOOOYVTPSA-N
Cannabis sativa	D-ARABINOSE|ARABINOSE	PYMYPHUHKUWMLA-WDCZJNDASA-N
Cannabis sativa	CANNABICHROMENE	UVOLYTDXHDXWJU-UHFFFAOYSA-N
Cannabis sativa	(-)-7R-CANNABICOUMARONONIC-ACID-A	WEYZBZCYDDIMCS-MRXNPFEDSA-N
Cannabis sativa	CAMPEST-4-EN-3-ONE	QQIOPZFVTIHASB-IMUDCKKOSA-N
Cannabis sativa	ARABINOSE|XYLOSE	PYMYPHUHKUWMLA-UHFFFAOYSA-N
Cannabis sativa	LINOLEIC-ACID	OYHQOLUKZRVURQ-IXWMQOLASA-N
Cannabis sativa	ARABINOSE	PYMYPHUHKUWMLA-MROZADKFSA-N
Cannabis sativa	ISOLINOLENIC-ACID	ZMKDEQUXYDZSNN-UTJQPWESSA-N
Cannabis sativa	GLUCOSAMINE|D-GLUCOSAMINE	MSWZFWKMSRAUBD-QZABAPFNSA-N
Cannabis sativa	SEC-BUTYLAMINE	BHRZNVHARXXAHW-UHFFFAOYSA-N
Cannabis sativa	(Z)-ANETHOL|CIS-ANETHOLE|ANETHOLE	RUVINXPYWBROJD-ARJAWSKDSA-N
Cannabis sativa	ALPHA-LINOLENIC-ACID|LINOLENIC-ACID	DTOSIQBPPRVQHS-PDBXOOCHSA-N
Cannabis sativa	FLAVOCANNABISIDE	QQBFHNKJGBCSLG-BPBUVSPTSA-N
Cannabis sativa	CANNABINEROLIC-ACID	SEEZIOZEUUMJME-VBKFSLOCSA-N
Cannabis sativa	ALLO-AROMADENDRENE|AROMADENDRENE	ITYNGVSTWVVPIC-LRUBOHGLSA-N
Cannabis sativa	DRONABINOL	CYQFCXCEBYINGO-DLBZAZTESA-N
Cannabis sativa	CANNABISIN-F	JCUQMHMUDDMCSX-AADBSILNSA-N
Cannabis sativa	GAMMA-BISABOLENE|BISABOLENE	XBGUIVFBMBVUEG-PFONDFGASA-N
Cannabis sativa	6-PRENYLAPIGENIN	VJDRSTHNWHVTNQ-UHFFFAOYSA-N
Cannabis sativa	CALAMENENE|CIS-CALAMENENE	PGTJIOWQJWHTJJ-STQMWFEESA-N
Cannabis sativa	ARABINIC-ACID	QXKAIJAYHKCRRA-UHFFFAOYSA-N
Cannabis sativa	CHLORIDE	VEXZGXHMUGYJMC-UHFFFAOYSA-N
Cannabis sativa	(+-)-GROSSAMIDE	DROXVBRNXCRUHP-XALRPAEYSA-N
Cannabis sativa	CANNABICHROMENIC-ACID	HRHJHXJQMNWQTF-UHFFFAOYSA-N
Cannabis sativa	DELTA-8-TETRAHYDROCANNABINOL|TETRAHYDROCANNABINOL	HCAWPGARWVBULJ-UHFFFAOYSA-N
Cannabis sativa	L-CAMPHENE|CAMPHENE|(-)-CAMPHENE	CRPUJAZIXJMDBK-UHFFFAOYSA-N
Cannabis sativa	CANNABISATIVINE	KZZKPJBKEJKNAK-UHFFFAOYSA-N
Cannabis sativa	DELTA-CADINENE|CADINENE|D-CADINENE	FUCYIEXQVQJBKY-ZFWWWQNUSA-N
Cannabis sativa	ALPHA-BISABOLENE|BISABOLENE	YHBUQBJHSRGZNF-VGOFMYFVSA-N
Cannabis sativa	CANNABICHROMANONE	NHZMSIOYBVIOAF-UHFFFAOYSA-N
Cannabis sativa	CHRYSOERIOL	SCZVLDHREVKTSH-UHFFFAOYSA-N
Cannabis sativa	ALPHA-ALANINE|ALANINE|L-ALANINE	QNAYBMKLOCPYGJ-REOHCLBHSA-N
Cannabis sativa	CANNABICYCLOL	IGHTZQUIFGUJTG-UHFFFAOYSA-N
Cannabis sativa	CAMPESTANOL	ARYTXMNEANMLMU-MLYZYVTISA-N
Cannabis sativa	STIGMASTA-4,22-DIEN-3-ONE	MKGZDUKUQPPHFM-MMXRWBBBSA-N
Cannabis sativa	CANNABIDIOLIC-ACID	WVOLTBSCXRRQFR-IRXDYDNUSA-N
Cannabis sativa	BORNEOL|ISOBORNEOL|(-)-BORNEOL	DTGKSKDOIYIVQL-CCNFQMFXSA-N
Cannabis sativa	HISTIDINE	HNDVDQJCIGZPNO-UHFFFAOYSA-N
Cannabis sativa	8-HYDROXYCANNABINOL	XUERFRQVGLONMR-UHFFFAOYSA-N
Cannabis sativa	PHOSPHORUS	XYFCBTPGUUZFHI-UHFFFAOYSA-N
Cannabis sativa	BORNEOL|ISOBORNEOL|(-)-BORNEOL	DTGKSKDOIYIVQL-UHFFFAOYSA-N
Cannabis sativa	TRANS-CALAMANENE|CALAMENENE	PGTJIOWQJWHTJJ-QWHCGFSZSA-N
Cannabis sativa	BORNYL-ACETATE|L-BORNYL-ACETATE|BORNEOL-ACETATE|(-)-BORNEOL-ACETATE	KGEKLUUHTZCSIP-HOSYDEDBSA-N
Cannabis sativa	4-HYDROXYBENZOIC-ACID|P-HYDROXY-BENZOIC-ACID|P-HYDROXYBENZOIC-ACID|4-HYDROXY-BENZOIC-ACID	FJKROLUGYXJWQN-UHFFFAOYSA-N
Cannabis sativa	D-CAMPHOR|CAMPHOR	DSSYKIVIOFKYAU-UHFFFAOYSA-N
Cannabis sativa	OXYPROLINE	PMMYEEVYMWASQN-IUYQGCFVSA-N
Cannabis sativa	CAMPESTANOL	ARYTXMNEANMLMU-ATEDBJNTSA-N
Cannabis sativa	FLAVOSATIVASIDE	FYTOTHFWELWOCG-OAFKVUNRSA-N
Cannabis sativa	ISOBUTANAL|ISOBUTYRALDEHYDE	AMIMRNSIRUDHCM-UHFFFAOYSA-N
Cannabis sativa	ALPHA-CAMPHENE|L-CAMPHENE|CAMPHENE|(-)-CAMPHENE	CRPUJAZIXJMDBK-BDAKNGLRSA-N
Cannabis sativa	GLUCOSAMINE|D-GLUCOSAMINE	MSWZFWKMSRAUBD-IVMDWMLBSA-N
Cannabis sativa	CAMPESTEROL	SGNBVLSWZMBQTH-PODYLUTMSA-N
Cannabis sativa	SULFUR-OXIDE	XTQHKBHJIVJGKJ-UHFFFAOYSA-N
Cannabis sativa	BEHENIC-ACID	UKMSUNONTOPOIO-UHFFFAOYSA-N
Cannabis sativa	N-BUTYL-AMINE	HQABUPZFAYXKJW-UHFFFAOYSA-N
Cannabis sativa	BETA-CAROTENE	OENHQHLEOONYIE-LZMNTPPDSA-N
Cannabis sativa	CAMPESTANOL	ARYTXMNEANMLMU-QAVKNOIRSA-N
Cannabis sativa	(+-)-DEMETHYLGROSSAMIDE	YBUBLAJQIDHBCG-KHTQKFKVSA-N
Cannabis sativa	3,3'-DIHYDROXY-4,5'-DIMETHOXY-2-ISOPENTENYLBIBENZYL	NGQFSSVGVDXEOE-UHFFFAOYSA-N
Cannabis sativa	4-HYDROXY-PROLINE|OXYPROLINE|HYDROXYPROLINE	PMMYEEVYMWASQN-UHFFFAOYSA-N
Cannabis sativa	CYTISOSIDE	ADCCDGCXRFALSQ-IIERAYBDSA-N
Cannabis sativa	ALPHA-BISABOLENE|BISABOLENE|CIS-ALPHA-BISABOLENE	YHBUQBJHSRGZNF-AUWJEWJLSA-N
Cannabis sativa	GLYCINE|GLYCOCOLL	DHMQDGOQFOQNFH-UHFFFAOYSA-N
Cannabis sativa	CANNABINOL	VBGLYOIFKLUMQG-UHFFFAOYSA-N
Cannabis sativa	DIHYDROACTINIDIOLIDE	IMKHDCBNRDRUEB-UHFFFAOYSA-N
Cannabis sativa	PHENYLALANINE	COLNVLDHVKWLRT-QMMMGPOBSA-N
Cannabis sativa	(+)-CAMPHOR|D-CAMPHOR|CAMPHOR	DSSYKIVIOFKYAU-XCBNKYQSSA-N
Cannabis sativa	ADONITOL|ARABITOL	HEBKCHPVOIAQTA-IMJSIDKUSA-N
Cannabis sativa	L-HISTIDINE|HISTIDINE	HNDVDQJCIGZPNO-YFKPBYRVSA-N
Cannabis sativa	CADAVERINE	VHRGRCVQAFMJIZ-UHFFFAOYSA-N
Cannabis sativa	CANNFLAVIN-A	MWGFICMOCSIQMV-LZYBPNLTSA-N
Cannabis sativa	TRIGONELLINE	WWNNZCOKKKDOPX-UHFFFAOYSA-O
Cannabis sativa	ORIENTIN-7-GLUCOSIDE	SPAHGZOYBCREJA-SEKYAQCESA-N
Cannabis sativa	CADINENE|GAMMA-CADINENE|GAMMA-MUUROLENE	WRHGORWNJGOVQY-UHFFFAOYSA-N
Cannabis sativa	CANNABISIN-D	XYTYRVFKBJENPE-HEVIKAOCSA-N
Cannabis sativa	BETA-CAROTENE|PROVITAMIN-A|CAROTENE	OENHQHLEOONYIE-JLTXGRSLSA-N
Cannabis sativa	BISABOLOL|ALPHA-BISABOLOL	RGZSQWQPBWRIAQ-GJZGRUSLSA-N
Cannabis sativa	CALAMENENE	PGTJIOWQJWHTJJ-UHFFFAOYSA-N
Cannabis sativa	CANNABIGEROLIC-ACID	SEEZIOZEUUMJME-FOWTUZBSSA-N
Cannabis sativa	CANNABIGEROL	QXACEHWTBCFNSA-SFQUDFHCSA-N
Cannabis sativa	PHENYLALANINE	COLNVLDHVKWLRT-MRVPVSSYSA-N
Cannabis sativa	ALANINE|BETA-ALANINE	UCMIRNVEIXFBKS-UHFFFAOYSA-N
Cannabis sativa	TRYPTOPHAN|L-(-)-TRYPTOPHAN	QIVBCDIJIAJPQS-UHFFFAOYSA-N
Cannabis sativa	PHENYLALANINE	COLNVLDHVKWLRT-UHFFFAOYSA-N
Cannabis sativa	CANNABIDIOL	QHMBSVQNZZTUGM-ROUUACIJSA-N
Cannabis sativa	TRYPTOPHAN|L-TRYPTOPHAN|L-(-)-TRYPTOPHAN	QIVBCDIJIAJPQS-VIFPVBQESA-N
Cannabis sativa	DIHYDROACTINIDIOLIDE	IMKHDCBNRDRUEB-LLVKDONJSA-N
Cannabis sativa	CANNABICOUMARONONE	CSSYBWPIBDITMG-UHFFFAOYSA-N
Cannabis sativa	L-ASCORBIC-ACID|ASCORBIC-ACID	TYQCGQRIZGCHNB-JLAZNSOCSA-N
Cannabis sativa	(-)-7-HYDROXYCANNABICHROMANE	ITDDKOGKAGSKEJ-NHCUHLMSSA-N
Cannabis sativa	CANNABIDIOL|CANNIBIDIOL	QHMBSVQNZZTUGM-QNSVNVJESA-N
Cannabis sativa	GAMMA-CADINENE	WRHGORWNJGOVQY-KFWWJZLASA-N
Cannabis sativa	ORIENTIN	PLAPMLGJVGLZOV-TZYVJGCXSA-N
Cannabis sativa	CANNABISATIVINE	KZZKPJBKEJKNAK-WERVVEIQSA-N
Cannabis sativa	BETA-BISABOLENE|BISABOLENE	XZRVRYFILCSYSP-OAHLLOKOSA-N
Cannabis sativa	OXYPROLINE|HYDROXYPROLINE	PMMYEEVYMWASQN-BKLSDQPFSA-N
Cannabis sativa	AZELAIC-ACID	BDJRBEYXGGNYIS-UHFFFAOYSA-N
Cannabis sativa	CAMPESTEROL	SGNBVLSWZMBQTH-UHFFFAOYSA-N
Senecio vulgaris	RETRORSINE	BCJMNZRQJAVDLD-CQRYIUNCSA-N
Senecio vulgaris	SENECIONINE	HKODIGSRFALUTA-JTLQZVBZSA-N
Senecio vulgaris	RIDDELLINE	SVCNNZDUGWLODJ-RAYFHMIRSA-N
Tamus communis	2,3,4,6,7-PENTAMETHOXYPHENANTHRENE	RNTAIKBFRNJDIV-UHFFFAOYSA-N
Tamus communis	STIGMASTEROL	HCXVJBMSMIARIN-BGDBIVFESA-N
Tamus communis	4,7-DIHYDROXY-2,6-DIMETHOXY-9,10-DIHYDROPHENANTHRENE	VOIQNADDPJLVPI-UHFFFAOYSA-N
Tamus communis	PHYTOSTEROL|SITOSTEROL|GAMMA-SITOSTEROL|NIMBOSTEROL|BETA-SITOSTEROL|SITOSTEROL-6'-LINOLYLGLUCOSIDE|(-)-BETA-SITOSTEROL	KZJWDPNRJALLNS-VJSFXXLFSA-N
Tamus communis	4,8-DIHYDROXY-2,3,7TRIMETHOXYPHENANTHRENE	QQSQQXUWCIVBRL-UHFFFAOYSA-N
Tamus communis	2,8-DIMETHOXY-7-HYDROXY-3,4,-METHYLENEDIOXYPHENANTHRENE	OEOFVVAOFKKBCH-UHFFFAOYSA-N
Tamus communis	NUDOL	JZIYNZGPIKGKQC-UHFFFAOYSA-N
Tamus communis	DENTHYRSININ	LLRLPRUFUGWYOL-UHFFFAOYSA-N
Tamus communis	CAMPESTEROL	SGNBVLSWZMBQTH-PODYLUTMSA-N
Tamus communis	3,7-DIHYDROXY-2,4-DIMETHOXYPHENANTHRENE	VUNWBEIDIFFPMG-UHFFFAOYSA-N
Tamus communis	LYCOXANTHIN	IFTRFNLCKUZSNG-SFEKFZNLSA-N
Tamus communis	1,3,5-DIMETHOXYPHENANTHREN-2,7-DIONE	COEBLPKMQZWZAX-KRWDZBQOSA-N
Tamus communis	BATATASIN-I	KGYHMWVRKYFQQR-UHFFFAOYSA-N
Tamus communis	4-HYDROXY-2,6,7-TRIMETHOXY-9,10-DIHYDROPHENANTHRENE	WXHRHUSAJYUZOX-UHFFFAOYSA-N
Tamus communis	8-HYDROXY-2,3,4,7-TETRAMETHOXYPHENANTHRENE	NCCUOOVNLSFGBK-UHFFFAOYSA-N
Tamus communis	4,7-DIHYDROXY-2,3-DIMETHOXYPHENANTHRENE	YQCHQMQSSOKCIR-UHFFFAOYSA-N
Tamus communis	ISOBATATASIN-I	BQUYXVYTCAIRQJ-UHFFFAOYSA-N
Tamus communis	5,7-DIMETHOXY-6-HYDROXY-1,2-METHYLENEDIOXYPHENANTHRENE	RDOYGGIEUXRWEI-UHFFFAOYSA-N
Tamus communis	CONFUSARIN	JHNVCKNCEVZGGC-UHFFFAOYSA-N
Ruta chalepensis	GRAVEOLINE	COBBNRKBTCBWQP-UHFFFAOYSA-N
Ruta chalepensis	GRAVEOLININE	QGCORDIPOBZNKC-UHFFFAOYSA-N
Ruta chalepensis	DICTAMINE|DICTAMNINE	WIONIXOBNMDJFJ-UHFFFAOYSA-N
Ruta chalepensis	RUTARIN	JWWFVRMFYKPZNE-ADZAWSABSA-N
Ruta chalepensis	CIS,TRANS-XANTHOXIN	ZTALKMXOHWQNIA-TVBSHJCBSA-N
Ruta chalepensis	BYANGELICIN|(+)-BYAKANGELICIN|BYAKANGELICIN	PKRPFNXROFUNDE-LLVKDONJSA-N
Ruta chalepensis	PSORALEN	ZCCUUQDIBDJBTK-UHFFFAOYSA-N
Ruta chalepensis	HELIETTIN	JCDLLLXYAICSQV-MRXNPFEDSA-N
Ruta chalepensis	ARBORININE	ATBZZQPALSPNMF-UHFFFAOYSA-N
Ruta chalepensis	CHALEPIN	JCDLLLXYAICSQV-INIZCTEOSA-N
Ruta chalepensis	UMBELLIFERONE|7-HYDROXYCOUMARIN	ORHBXUUXSCNDEV-UHFFFAOYSA-N
Ruta chalepensis	CHALEPENSIN	FYCCCUNGXGKNJV-UHFFFAOYSA-N
Ruta chalepensis	5-METHOXY-PSORALEN|PSOBERAN|BERGAPTAN|BERGAPTEN	BGEBZHIAGXMEMV-UHFFFAOYSA-N
Ruta chalepensis	MACULOSIDINE	SHAVHFJCSQWTFF-UHFFFAOYSA-N
Ruta chalepensis	TAIFINE|ISOTAIFINE	NYRFIEXUGCQNIN-UHFFFAOYSA-N
Ruta chalepensis	SKIMMIANINE	SLSIBLKBHNKZTB-UHFFFAOYSA-N
Ruta chalepensis	ISOGRAVACRIDONECHLORINE	PGOOUZZLZBIMRI-HNAYVOBHSA-N
Ruta chalepensis	RUTAMARIN	AWMHMGFGCLBSAY-SFHVURJKSA-N
Ruta chalepensis	KOKUSAGININE	JBRXRVFXQIKPEA-UHFFFAOYSA-N
Ruta chalepensis	ISOPIMPINELLIN	DFMAXQKDIGCMTL-UHFFFAOYSA-N
Ruta chalepensis	8-METHOXYTAIFINE	XZUFTTIASQVRFE-UHFFFAOYSA-N
Ruta chalepensis	XANTHYLETIN	QOTBQNVNUBKJMS-UHFFFAOYSA-N
Ruta chalepensis	RUTACRIDONE	FHAGACMCMQYSNX-HNNXBMFYSA-N
Tilia tomentosa	EUGENOL	RRAFCDWBNXTKKO-UHFFFAOYSA-N
Tilia tomentosa	TRANS-FARNESOL|TRANS-TRANS-FARNESOL|FARNESOL	CRDAMVZIKSXKFV-YFVJMOTDSA-N
Tilia tomentosa	EICOSANE	CBFCDTFDPHXCNY-UHFFFAOYSA-N
Tilia tomentosa	KAEMPFEROL-3(P-COUMAROYLGLUCOSIDE)	MUKDIIVMECIYQR-PONYGINPSA-N
Tilia tomentosa	ALANINE	QNAYBMKLOCPYGJ-UWTATZPHSA-N
Tilia tomentosa	ASRAGALIN|KAEMPFEROL-3-O-BETA-D-GLUCOSIDE|KAEMPFEROL-3-O-GLUCOSIDE|ASTRAGALIN|KAEMPFEROL-3-0-GLUCOSIDE	JPUKWEQWGBDDQB-QSOFNFLRSA-N
Tilia tomentosa	WATER	XLYOFNOQVPJJNP-UHFFFAOYSA-N
Tilia tomentosa	CARVENE|L-LIMONENE|LIMONENE|(-)-LIMONENE|DIPENTENE	XMGQYMWWDOXHJM-SNVBAGLBSA-N
Tilia tomentosa	NONADECANE|N-NONADECANE	LQERIDTXQFOHKA-UHFFFAOYSA-N
Tilia tomentosa	BETA-AMYRIN	JFSHUTJDVKUMTJ-KOMNAURRSA-N
Tilia tomentosa	ISOLEUCINE	AGPKZVBTJJNPAG-UHFFFAOYSA-N
Tilia tomentosa	DIHYDROSITOSTEROL|SITOSTANOL|STIGMASTANOL	LGJMUZUPVCAVPU-UHFFFAOYSA-N
Tilia tomentosa	CYSTINE-(HALF)|CYSTEINE|CYSTINE|L-CYSTEINE	XUJNEKJLAYXESH-REOHCLBHSA-N
Tilia tomentosa	AFZELIN|KAEMPFEROL-3-O-ALPHA-RHAMNOSIDE|KAEMPFERIN|KAEMPFEROL-3-O-ALPHA-L-RHAMNOSIDE|KAEMPFEROL-3-RHAMNOSIDE|KAEMPFEROL-3-O-RHAMNOSIDE	SOSLMHZOJATCCP-AEIZVZFYSA-N
Tilia tomentosa	MENTH-1-EN-4-OL|4-TERPINEOL|TERPINEN-4-OL|TERPINENOL|TERPINEN-4-OL-METHYL-ETHER|1-TERPINEN-4-OL|TERPINEOL	WRYLYDPHFGVWKC-UHFFFAOYSA-N
Tilia tomentosa	BETA-AMYRIN	JFSHUTJDVKUMTJ-XCIKXOPNSA-N
Tilia tomentosa	QUERCETIN-3-GLUCOSIDE-7-RHAMNOSIDE	OTUCXMIQUNROBJ-QHOFJVTBSA-N
Tilia tomentosa	STIGMASTEROL	HCXVJBMSMIARIN-HJWRWDBZSA-N
Tilia tomentosa	DL-TERPINEOL|D-ALPHA-TERPINEOL|TERPINENOL|ALPHA-TERPINEOL|D-TERPINEOL|I-TERPINEOL|TERPINEOL	WUOACPNHFRMFPN-UHFFFAOYSA-N
Tilia tomentosa	ALPHA-LINOLEIC-ACID|LINOLEIC-ACID	OYHQOLUKZRVURQ-HZJYTTRNSA-N
Tilia tomentosa	ISOCHLOROGENIC-ACID|CHLOROGENIC-ACID	CWVRJTMFETXNAD-DUXPYHPUSA-N
Tilia tomentosa	TRANS-GERANIOL|GERANIOL|NEROL	GLZPCOQZEFWAFX-JXMROGBWSA-N
Tilia tomentosa	TYROSINE	JZKXXXDKRQWDET-UHFFFAOYSA-N
Tilia tomentosa	TYROSINE	OUYCCCASQSFEME-UHFFFAOYSA-N
Tilia tomentosa	D-NEROLIDOL|NEROLIDOL|NEROLIDIOL	FQTLCLSUCSAZDY-QKXCFHHRSA-N
Tilia tomentosa	STIGMASTEROL	HCXVJBMSMIARIN-PHZDYDNGSA-N
Tilia tomentosa	AMYRIN|BETA-AMYRIN	JFSHUTJDVKUMTJ-QHPUVITPSA-N
Tilia tomentosa	HENEICOSANE|N-HENEICOSANE	FNAZRRHPUDJQCJ-UHFFFAOYSA-N
Tilia tomentosa	QUERCETRIN|QUERCETIN-3-RHAMNOSIDE|QUERCETIN-3-O-RHAMNOSIDE|QUERCITRIN	OXGUCUVFOIWWQJ-XIMSSLRFSA-N
Tilia tomentosa	HESPERIDIN	QUQPHWDTPGMPEX-QJBIFVCTSA-N
Tilia tomentosa	ISOLEUCINE	AGPKZVBTJJNPAG-UHNVWZDZSA-N
Tilia tomentosa	PALMITIC-ACID|HEXADECANOIC-ACID	IPCSVZSSVZVIGE-UHFFFAOYSA-N
Tilia tomentosa	OLEIC-ACID	ZQPPMHVWECSIRJ-KTKRTIGZSA-N
Tilia tomentosa	XANTHOPHYLL	KBPHJBAIARWVSC-JUUKCSAQSA-N
Tilia tomentosa	CIS-TRANS-FARNESOL|FARNESOL	CRDAMVZIKSXKFV-PVMFERMNSA-N
Tilia tomentosa	COUMARIN|COUMARIC-ACID	ZYGHJZDHTFUPRJ-UHFFFAOYSA-N
Tilia tomentosa	GERANYL-ACETATE|GERANIOL-ACETATE|ACETIC-ACID-GERANIOL-ESTER|NERYL-ACETATE	HIGQPQRQIQDZMP-DHZHZOJOSA-N
Tilia tomentosa	CAFFEIC-ACID|TRANS-CAFFEIC-ACID|DIHYDROXYCINNAMIC-ACID|3,4-DIHYDROXYCINNAMIC-ACID	QAIPRVGONGVQAS-DUXPYHPUSA-N
Tilia tomentosa	GLUTAMIC-ACID	WHUUTDBJXJRKMK-UHFFFAOYSA-N
Tilia tomentosa	TRIACONTANE|N-TRIACONTANE	JXTPJDDICSTXJX-UHFFFAOYSA-N
Tilia tomentosa	OCTACOSANE|N-OCTACOSANE	ZYURHZPYMFLWSH-UHFFFAOYSA-N
Tilia tomentosa	QUERCETIN-3-O-GLUCOSIDE|TRIFOLIIN|HIRSUTRIN|ISOQUERCETIN|ISOQUERCITRIN|QUERCETOL-3-GLUCOSIDE|QUERCETIN-3-BETA-D-GLUCOSIDE|QUERCETIN-3-O-BETA-D-GLUCOSIDE|QUERCETIN-3-O-BETA-D-GLUCOPYRANOSIDE	OVSQVDMCBVZWGM-QSOFNFLRSA-N
Tilia tomentosa	LUTEIN|XANTHOPHYLL|LUTEIN-ESTER	KBPHJBAIARWVSC-DKLMTRRASA-N
Tilia tomentosa	QUERCETRIN|QUERCETIN-3-O-RHAMNOSIDE|QUERCITRIN	OXGUCUVFOIWWQJ-KNPIPFGMSA-N
Tilia tomentosa	ALPHA-PINENE|(-)-ALPHA-PINENE|(-)-PINENE|PINENE|1S,5S-(-)-ALPHA-PINENE	GRWFGVWFFZKLTI-IUCAKERBSA-N
Tilia tomentosa	SERINE	MTCFGRXMJLQNBG-UHFFFAOYSA-N
Tilia tomentosa	VALINE	KZSNJWFQEVHDMF-BYPYZUCNSA-N
Tilia tomentosa	STIGMASTEROL	HCXVJBMSMIARIN-KEJCWXRGSA-N
Tilia tomentosa	PHYTOSTEROL|SITOSTEROL|GAMMA-SITOSTEROL|NIMBOSTEROL|BETA-SITOSTEROL|CLIONASTEROL	KZJWDPNRJALLNS-FBZNIEFRSA-N
Tilia tomentosa	SUCROSE	CZMRCDWAGMRECN-FXFGBNHJSA-N
Tilia tomentosa	TRICHOSANE|TRICOSANE|N-TRICOSANE	FIGVVZUWCLSUEI-UHFFFAOYSA-N
Tilia tomentosa	HESPERIDIN	QUQPHWDTPGMPEX-UHFFFAOYSA-N
Tilia tomentosa	CHLOROGENIC-ACID	CWVRJTMFETXNAD-VRWXVSRJSA-N
Tilia tomentosa	CYSTINE	LEVWYRKDKASIDU-IMJSIDKUSA-N
Tilia tomentosa	(E)-NEROLIDOL|NEROLIDOL	FQTLCLSUCSAZDY-GOFCXVBSSA-N
Tilia tomentosa	N-PENTACOSANE|PENTACOSANE	YKNWIILGEFFOPE-UHFFFAOYSA-N
Tilia tomentosa	LINALOL|LINALOOL|(-)-LINALOOL	CDOSHBSSFJOMGT-UHFFFAOYSA-N
Tilia tomentosa	SQUALENE	YYGNTYWPHWGJRM-AAJYLUCBSA-N
Tilia tomentosa	ALPHA-ALANINE|ALANINE|L-ALANINE	QNAYBMKLOCPYGJ-UHFFFAOYSA-N
Tilia tomentosa	2-PHENYLETHANOL|BETA-PHENETHYL-ALCOHOL|BETA-PHENYLETHANOL|PHENETHYL-ALCOHOL|BETA-PHENYLETHYLALCOHOL|2-PHENYLETHAN-1-OL|2-PHENYLETHYL-ALCOHOL|PHENYL-ETHYL-ALCOHOL|PHENYLETHANOL	WRMNZCZEMHIOCP-UHFFFAOYSA-N
Tilia tomentosa	ASCORBIC-ACID	TYQCGQRIZGCHNB-MVHIGOERSA-N
Tilia tomentosa	(+)-LIMONENE|(+)-S-CARVONE|LIMONENE|CARVENE|DIPENTENE|(-)-LIMONENE|D-LIMONENE	XMGQYMWWDOXHJM-JTQLQIEISA-N
Tilia tomentosa	TETRACOSANE|N-TETRACOSANE	POOSGDOYLQNASK-UHFFFAOYSA-N
Tilia tomentosa	ISOLEUCINE	AGPKZVBTJJNPAG-WHFBIAKZSA-N
Tilia tomentosa	LIMONENE|LINONENE|L-LIMONENE|DIPENTENE|(-)-LIMONENE|(+)-MENTHA-1,8-DIENE|DL-LIMONENE|TERPINOLENE	XMGQYMWWDOXHJM-UHFFFAOYSA-N
Tilia tomentosa	LEUCINE	ROHFNLRQFUQHCH-YFKPBYRVSA-N
Tilia tomentosa	TOCOPHEROL|GAMMA-TOCOPHEROL	QUEDXNHFTDJVIY-DQCZWYHMSA-N
Tilia tomentosa	P-COUMARIC-ACID|4-HYDROXYCINNAMIC-ACID|P-COUMARINIC-ACID|TRANS-P-COUMARIC-ACID|P-HYDROXYCINNAMIC-ACID	NGSWKAQJJWESNS-ZZXKWVIFSA-N
Tilia tomentosa	TOCOPHEROL|ALPHA-TOCOPHEROL|VITAMIN-E	GVJHHUAWPYXKBD-IEOSBIPESA-N
Tilia tomentosa	DIHYDRO-BETA-SITOSTEROL|SITOSTANOL|DIHYDROSITOSTEROL|SITOSTEROL|STIGMASTANOL	LGJMUZUPVCAVPU-HRJGVYIJSA-N
Tilia tomentosa	TOCOPHEROL|ALPHA-TOCOPHEROL|VITAMIN-E	GVJHHUAWPYXKBD-IHMCZWCLSA-N
Tilia tomentosa	ALPHA-LINOLENIC-ACID|LINOLENIC-ACID	DTOSIQBPPRVQHS-PDBXOOCHSA-N
Tilia tomentosa	KAEMPFEROL-3,7-DIRHAMNOSIDE|KAEMPFERITRIN	PUPKKEQDLNREIM-QNSQPKOQSA-N
Tilia tomentosa	L-ASPARAGINE|ASPARAGINE	DCXYFEDJOCDNAF-UHFFFAOYSA-N
Tilia tomentosa	CYSTINE	LEVWYRKDKASIDU-UHFFFAOYSA-N
Tilia tomentosa	2-PHENYLETHYL-BENZOATE	OSORMYZMWHVFOZ-UHFFFAOYSA-N
Tilia tomentosa	GLYCINE|GLYCOCOLL	DHMQDGOQFOQNFH-UHFFFAOYSA-N
Tilia tomentosa	ALPHA-PINENE|L-ALPHA-PINENE|(-)-PINENE|PINENE|(-)-ALPHA-PINENE	GRWFGVWFFZKLTI-UHFFFAOYSA-N
Tilia tomentosa	VANILLIN|P-VANILLIN|VANNILALDEHYDE	MWOOGOJBHIARFG-UHFFFAOYSA-N
Tilia tomentosa	BETA-SITOSTEROL|GAMMA-SITOSTEROL	KZJWDPNRJALLNS-UHFFFAOYSA-N
Tilia tomentosa	BETA-SITOSTEROL	KZJWDPNRJALLNS-GDQWMHGZSA-N
Tilia tomentosa	ALPHA-ALANINE|ALANINE|L-ALANINE	QNAYBMKLOCPYGJ-REOHCLBHSA-N
Tilia tomentosa	FARNESOL	CRDAMVZIKSXKFV-FBXUGWQNSA-N
Tilia tomentosa	D-SUCROSE|SACCAROSE|SACCHAROSE|SUCROSE|INULIN	CZMRCDWAGMRECN-UGDNZRGBSA-N
Tilia tomentosa	DIHYDRO-BETA-SITOSTEROL|DIHYDROSITOSTEROL|SITOSTANOL|STIGMASTANOL	LGJMUZUPVCAVPU-QWANIPNWSA-N
Tilia tomentosa	SUCROSE	CZMRCDWAGMRECN-ZTGZREJBSA-N
Tilia tomentosa	QUERCETIN-RHAMNOSIDE-XYLOSIDE	LKCWNKWQDHJLCT-OWJGGDCJSA-N
Tilia tomentosa	TARAXEROL	GGGUGZHBAOMSFJ-GADYQYKKSA-N
Tilia tomentosa	N-HENTRIACONTANE|HENTRIACONTANE	IUJAMGNYPWYUPM-UHFFFAOYSA-N
Tilia tomentosa	DIHYDROSITOSTEROL|SITOSTANOL|STIGMASTANOL	LGJMUZUPVCAVPU-BYKIICAPSA-N
Tilia tomentosa	CHLOROGENIC-ACID|CAFFEOYLQUINIC-ACID|ISOCHLOROGENIC-ACID|3-O-CAFFEOYLQUINIC-ACID|TRANS-CHLOROGENIC-ACID|3-CAFFEOYLQUINIC-ACID	CWVRJTMFETXNAD-JUHZACGLSA-N
Tilia tomentosa	TARAXEROL	GGGUGZHBAOMSFJ-MKWCDXGHSA-N
Tilia tomentosa	XANTHOPHYLL	KBPHJBAIARWVSC-WGDSMFBMSA-N
Tilia tomentosa	QUERCETIN-3-GLUCOSIDE-7-RHAMNOSIDE	OTUCXMIQUNROBJ-JFNZIVIESA-N
Tilia tomentosa	SERINE	MTCFGRXMJLQNBG-REOHCLBHSA-N
Tilia tomentosa	DELTA-TOCOPHEROL|TOCOPHEROL	GZIFEOYASATJEH-VHFRWLAGSA-N
Tilia tomentosa	OCTADECANE|N-OCTADECANE	RZJRJXONCZWCBN-UHFFFAOYSA-N
Tilia tomentosa	TYROSINE	WRFPVMFCRNYQNR-UHFFFAOYSA-N
Tilia tomentosa	I-TERPINEOL|GAMMA-TERPINEOL|TERPINEOL|P-MENTH-4(8)-EN-1-OL	NNRLDGQZIVUQTE-UHFFFAOYSA-N
Tilia tomentosa	TYROSINE	OUYCCCASQSFEME-MRVPVSSYSA-N
Tilia tomentosa	GLUTAMIC-ACID	WHUUTDBJXJRKMK-GSVOUGTGSA-N
Tilia tomentosa	PHENYLALANINE	COLNVLDHVKWLRT-QMMMGPOBSA-N
Tilia tomentosa	I-TERPINEOL|TERPINEOL|ALPHA-TERPINEOL	WUOACPNHFRMFPN-VIFPVBQESA-N
Tilia tomentosa	DIHYDRO-BETA-SITOSTEROL|SITOSTANOL|DIHYDROSITOSTEROL|SITOSTEROL|STIGMASTANOL	LGJMUZUPVCAVPU-KZXGMYDKSA-N
Tilia tomentosa	DOCOSANE	HOWGUJZVBDQJKV-UHFFFAOYSA-N
Tilia tomentosa	SERINE	MTCFGRXMJLQNBG-UWTATZPHSA-N
Tilia tomentosa	NEROLIDOL|TRANS-NEROLIDOL|ALPHA-NEROLIDOL	FQTLCLSUCSAZDY-SDNWHVSQSA-N
Tilia tomentosa	KAEMPFEROL-3-GLUCO-7-RHAMNOSIDE	JZMDHNZJOZUDLG-WLKYBKRHSA-N
Tilia tomentosa	BETA-AMYRIN	JFSHUTJDVKUMTJ-QKAPCWNWSA-N
Tilia tomentosa	KAEMPFEROL-3(P-COUMAROYLGLUCOSIDE)	IKONEAPXVKTZFF-IZCYYECASA-N
Tilia tomentosa	HYPERIN|QUERCETIN-3-O-GALACTOSIDE|ISOQUERCITRIN|HYPEROSIDE	OVSQVDMCBVZWGM-UHFFFAOYSA-N
Tilia tomentosa	QUERCETIN|QUERCETOL	REFJWTPEDVJJIY-UHFFFAOYSA-N
Tilia tomentosa	TOCOPHEROL|ALPHA-TOCOPHEROL|VITAMIN-E	GVJHHUAWPYXKBD-UHFFFAOYSA-N
Tilia tomentosa	QUERCETIN-3-O-GLUCOSIDE|ISOQUERCITRIN|TRIFOLIIN	OVSQVDMCBVZWGM-ZVIPYZFUSA-N
Tilia tomentosa	PHLOROGLUCINOL	QCDYQQDYXPDABM-UHFFFAOYSA-N
Tilia tomentosa	N-HEPTACOSAN|HEPTACOSANE|N-HEPTACOSANE	BJQWYEJQWHSSCJ-UHFFFAOYSA-N
Tilia tomentosa	SACCHAROSE|SUCROSE|INULIN	CZMRCDWAGMRECN-UHFFFAOYSA-N
Tilia tomentosa	LINARIN|ACACIIN	YFVGIJBUXMQFOF-PJOVQGMDSA-N
Tilia tomentosa	CYSTEINE	XUJNEKJLAYXESH-UHFFFAOYSA-N
Tilia tomentosa	VANILLIN|O-VANILLIN	JJVNINGBHGBWJH-UHFFFAOYSA-N
Tilia tomentosa	TARAXEROL	GGGUGZHBAOMSFJ-UHFFFAOYSA-N
Tilia tomentosa	TYROSINE	OUYCCCASQSFEME-QMMMGPOBSA-N
Tilia tomentosa	PHENYLALANINE	COLNVLDHVKWLRT-MRVPVSSYSA-N
Tilia tomentosa	ALANINE|BETA-ALANINE	UCMIRNVEIXFBKS-UHFFFAOYSA-N
Tilia tomentosa	LINALYL-ACETATE|LINALOOL-ACETATE|LINALOL-ACETATE	UWKAYLJWKGQEPM-UHFFFAOYSA-N
Tilia tomentosa	PHENYLALANINE	COLNVLDHVKWLRT-UHFFFAOYSA-N
Tilia tomentosa	I-TERPINEOL|TERPINEOL|ALPHA-TERPINEOL	WUOACPNHFRMFPN-SECBINFHSA-N
Tilia tomentosa	TRANS-BETA-TERPINEOL|CIS-BETA-TERPINEOL|I-TERPINEOL|BETA-TERPINEOL|TERPINEOL|P-MENTH-8-EN-1-OL	RUJPNZNXGCHGID-UHFFFAOYSA-N
Tilia tomentosa	ACACETIN-7-RUTINOSIDE|LINARIN	YFVGIJBUXMQFOF-OFSFZXSLSA-N
Tilia tomentosa	CHLOROGENIC-ACID	CWVRJTMFETXNAD-VQWGVLBKSA-N
Tilia tomentosa	(-)-PINENE|(+)-PINENE|ALPHA-PINENE|(+)-ALPHA-PINENE|L-ALPHA-PINENE|PINENE|(-)-ALPHA-PINENE|1R,5R-(+)-ALPHA-PINENE	GRWFGVWFFZKLTI-RKDXNWHRSA-N
Tilia tomentosa	QUERCETRIN|QUERCETIN-3-RHAMNOSIDE|QUERCETIN-3-O-RHAMNOSIDE|QUERCITRIN	OXGUCUVFOIWWQJ-HQBVPOQASA-N
Tilia tomentosa	L-ASCORBIC-ACID|ASCORBIC-ACID	TYQCGQRIZGCHNB-JLAZNSOCSA-N
Tilia tomentosa	LUTEIN|XANTHOPHYLL|LUTEIN-ESTER	KBPHJBAIARWVSC-RTIVXWJOSA-N
Tilia tomentosa	BETA-AMYRIN	JFSHUTJDVKUMTJ-UHFFFAOYSA-N
Tilia tomentosa	PHYTOSTEROL|SITOSTEROL|GAMMA-SITOSTEROL|NIMBOSTEROL|BETA-SITOSTEROL|SITOSTEROL-6'-LINOLYLGLUCOSIDE|(-)-BETA-SITOSTEROL	KZJWDPNRJALLNS-VJSFXXLFSA-N
Tilia tomentosa	L-ASPARAGINE|ASPARAGINE	DCXYFEDJOCDNAF-REOHCLBHSA-N
Tilia tomentosa	TILIROSIDE	DVGGLGXQSFURLP-VWMSDXGPSA-N
Tilia tomentosa	HEXACOSANE|N-HEXACOSANE	HMSWAIKSFDFLKN-UHFFFAOYSA-N
Tilia tomentosa	SUCROSE	CZMRCDWAGMRECN-MMVSOTICSA-N
Tilia tomentosa	GERANIOL|NEROL	GLZPCOQZEFWAFX-YFHOEESVSA-N
Tilia tomentosa	HESPERIDIN|HESPERITIN-7-RUTINOSIDE	QUQPHWDTPGMPEX-RBSJMJCGSA-N
Tilia tomentosa	ASPARAGINE	DCXYFEDJOCDNAF-UWTATZPHSA-N
Tilia tomentosa	GLUTAMIC-ACID|L-GLUTAMIC-ACID	WHUUTDBJXJRKMK-VKHMYHEASA-N
Tilia tomentosa	CIS-TRANS-FARNESOL|FARNESOL	CRDAMVZIKSXKFV-GNESMGCMSA-N
Nepeta cataria	P-CYMENOL|CARVACROL	RECUKUPTGUEGMW-UHFFFAOYSA-N
Nepeta cataria	EUGENOL	RRAFCDWBNXTKKO-UHFFFAOYSA-N
Nepeta cataria	ZINC	HCHKCACWOHOZIP-UHFFFAOYSA-N
Nepeta cataria	(R)-CITRONELLAL|(+)-CITRONELLAL|CITRONELLAL	NEHNMFOYXAPHSD-SNVBAGLBSA-N
Nepeta cataria	CITRONELLOL|BETA-CITRONELLOL	QMVPMAAFGQKVCJ-UHFFFAOYSA-N
Nepeta cataria	DIHYDRONEPETALACTONE	LSRNBGXEEKNZHN-JQCXWYLXSA-N
Nepeta cataria	WATER	XLYOFNOQVPJJNP-UHFFFAOYSA-N
Nepeta cataria	CHROMIUM	VYZAMTAEIAYCRO-UHFFFAOYSA-N
Nepeta cataria	ALUMINUM	AZDRQVAHHNSJOQ-UHFFFAOYSA-N
Nepeta cataria	NIACIN|NICOTINIC-ACID	PVNIIMVLHYAWGP-UHFFFAOYSA-N
Nepeta cataria	CARVENE|L-LIMONENE|LIMONENE|(-)-LIMONENE|DIPENTENE	XMGQYMWWDOXHJM-SNVBAGLBSA-N
Nepeta cataria	PULEGONE	NZGWDASTMWDZIW-QMMMGPOBSA-N
Nepeta cataria	BETA-ELEMENE|(-)-BETA-ELEMENE|ALPHA-ELEMENE|ELEMENE|BETAPELEMENE	OPFTUNCRGUEPRZ-UHFFFAOYSA-N
Nepeta cataria	BETA-CAROTENE|ZETA-CAROTENE	BIWLELKAFXRPDE-WTXAYMOSSA-N
Nepeta cataria	TRANS-1,2,TRANS-1,5-2-(1-FORMYLETHYL)-5-METHYL-CYCLOPENTANECARBOXYLIC-ACIDNEPETALIC-ACID	RGTMAXSVLBZNEL-XAVMHZPKSA-N
Nepeta cataria	(-)-NEPETASIDE	CUIDBUWFCFYEPL-PHAGJBIYSA-N
Nepeta cataria	TIN	OLGIDLDDXHSYFE-UHFFFAOYSA-N
Nepeta cataria	(-)-CAMPHOR|CAMPHOR	DSSYKIVIOFKYAU-OIBJUYFYSA-N
Nepeta cataria	NEONEPETALACTONE	BDXDSAWGUGHUQP-HTQZYQBOSA-N
Nepeta cataria	ANEURINE|THIAMINE|THIAMIN|VITAMIN-B-1|VIT-B-1	JZRWCGZRTZMZEH-UHFFFAOYSA-N
Nepeta cataria	(-)-CARYOPHYLLENE|ALPHA-HUMULENE|ALPHA-CARYOPHYLLENE|HUMULENE	FAMPSKZZVDUYOS-HRGUGZIWSA-N
Nepeta cataria	IRON-OXIDE|IRON	XEEYBQQBJWHFJM-UHFFFAOYSA-N
Nepeta cataria	PETROSELENIC-ACID|PETROSELINIC-ACID	CNVZJPUDSLNTQU-OUKQBFOZSA-N
Nepeta cataria	TRANS-OCIMENE|(E)-OCIMENE|(Z)-BETA-OCIMENE|(E)-BETA-OCIMENE|TRANS-BETA-OCIMENE|BETA-OCIMENE|OCIMENE	IHPKGUQCSIINRJ-CSKARUKUSA-N
Nepeta cataria	7-DEOXYLOGANIC-ACID	DSXFHNSGLYXPNG-YDYVGBNJSA-N
Nepeta cataria	ALPHA-LINOLEIC-ACID|LINOLEIC-ACID	OYHQOLUKZRVURQ-HZJYTTRNSA-N
Nepeta cataria	TRANS-GERANIOL|GERANIOL|NEROL	GLZPCOQZEFWAFX-JXMROGBWSA-N
Nepeta cataria	NEPETALIC-ACID	RGTMAXSVLBZNEL-RBXMUDONSA-N
Nepeta cataria	MYRCENE|ALPHA-MYRCENE	VYBREYKSZAROCT-UHFFFAOYSA-N
Nepeta cataria	PULEGONE	NHPCTOQWRLAEGD-UHFFFAOYSA-N
Nepeta cataria	ROSMARINOL|LABIATENIC-ACID|ROSMARINIC-ACID|ROSMARIC-ACID	DOUMFZQKYFQNTF-WUTVXBCWSA-N
Nepeta cataria	PETROSELENIC-ACID|PETROSELINIC-ACID	CNVZJPUDSLNTQU-SEYXRHQNSA-N
Nepeta cataria	CITRONELLOL|BETA-CITRONELLOL	QMVPMAAFGQKVCJ-SNVBAGLBSA-N
Nepeta cataria	DODECANOIC-ACID|NEODECANOIC-ACID|LAURIC-ACID	POULHZVOKOAJMA-UHFFFAOYSA-N
Nepeta cataria	COBALT	GUTLYIVDDKVIGB-UHFFFAOYSA-N
Nepeta cataria	RIBOFLAVIN|VITAMIN-B-2	AUNGANRZJHBGPY-UHFFFAOYSA-N
Nepeta cataria	(E)-OCIMENE|CIS-OCIMENE	XJPBRODHZKDRCB-CSKARUKUSA-N
Nepeta cataria	NEONEPETALACTONE	BDXDSAWGUGHUQP-UHFFFAOYSA-N
Nepeta cataria	PALMITIC-ACID|HEXADECANOIC-ACID	IPCSVZSSVZVIGE-UHFFFAOYSA-N
Nepeta cataria	OLEIC-ACID	ZQPPMHVWECSIRJ-KTKRTIGZSA-N
Nepeta cataria	(E)-CITRAL|CITRAL|CITRAL-ALPHA|CITRAL-B|CITRAL-A|GERANIAL	WTEVQBCEXWBHNA-JXMROGBWSA-N
Nepeta cataria	THYMOL-METHYL-ETHER|1-ISOPROPYL-2-METHOXY-4-METHYLBENZENE|THYMYL-METHYL-ETHER	LSQXNMXDFRRDSJ-UHFFFAOYSA-N
Nepeta cataria	NEPETALIC-ANHYDRIDE	HXFBSJZTEMCZFX-UHFFFAOYSA-N
Nepeta cataria	BETA-CARYOPHYLLENE|CIS-CARYOPHYLLENE|(-)-CARYOPHYLLENE	NPNUFJAVOOONJE-WDZFZDKYSA-N
Nepeta cataria	URSOLIC-ACID|URSOLIC-ACID-I	WCGUUGGRBIKTOS-APYMDAETSA-N
Nepeta cataria	CITRONELLOL	JGQFVRIQXUFPAH-JTQLQIEISA-N
Nepeta cataria	PHYTOSTEROL|SITOSTEROL|GAMMA-SITOSTEROL|NIMBOSTEROL|BETA-SITOSTEROL|CLIONASTEROL	KZJWDPNRJALLNS-FBZNIEFRSA-N
Nepeta cataria	BETA-CARYOPHYLLENE|(-)-ISOCARYOPHYLLENE|ISOCARYOPHYLLENE|(-)-CARYOPHYLLENE	NPNUFJAVOOONJE-FLFDDASRSA-N
Nepeta cataria	CARYOPHYLLENEPOXIDE|CARYOPHYLLENE-OXIDE	NVEQFIOZRFFVFW-SIUPQYRZSA-N
Nepeta cataria	CARYOPHYLLENEPOXIDE|CARYOPHYLLENE-OXIDE	NVEQFIOZRFFVFW-UJFKTDLFSA-N
Nepeta cataria	MAGNESIUM	RSHAOIXHUHAZPM-UHFFFAOYSA-N
Nepeta cataria	ASCORBIC-ACID	TYQCGQRIZGCHNB-MVHIGOERSA-N
Nepeta cataria	(+)-LIMONENE|(+)-S-CARVONE|LIMONENE|CARVENE|DIPENTENE|(-)-LIMONENE|D-LIMONENE	XMGQYMWWDOXHJM-JTQLQIEISA-N
Nepeta cataria	CITRONELLAL	NEHNMFOYXAPHSD-JTQLQIEISA-N
Nepeta cataria	NEPETOIDIN-A	FOWPKLFOIDTRMY-YXPGJMBHSA-N
Nepeta cataria	SELENIUM	SPVXKVOXSXTJOY-UHFFFAOYSA-N
Nepeta cataria	LIMONENE|LINONENE|L-LIMONENE|DIPENTENE|(-)-LIMONENE|(+)-MENTHA-1,8-DIENE|DL-LIMONENE|TERPINOLENE	XMGQYMWWDOXHJM-UHFFFAOYSA-N
Nepeta cataria	LINOLEIC-ACID	OYHQOLUKZRVURQ-IXWMQOLASA-N
Nepeta cataria	3-HEXENYL-BENZOATE	BCOXBEHFBZOJJZ-ONEGZZNKSA-N
Nepeta cataria	BETA-NEPETALACTONE|TRANS-CIS-NEPETALACTONE|NEPETALACTONE|ALPHA-NEPETALACTONE	ZDKZHVNKFOXMND-ZQARSLAVSA-N
Nepeta cataria	ALPHA-LINOLENIC-ACID|LINOLENIC-ACID	DTOSIQBPPRVQHS-PDBXOOCHSA-N
Nepeta cataria	BETA-MYRCENE|MYRCENE	UAHWPYUMFXYFJY-UHFFFAOYSA-N
Nepeta cataria	(-)-ISOPULEGONE|PULEGONE|ISOPULEGONE	NZGWDASTMWDZIW-UHFFFAOYSA-N
Nepeta cataria	SILICON	BLRPTPMANUNPDV-UHFFFAOYSA-N
Nepeta cataria	PENTADECANOIC-ACID	WQEPLUUGTLDZJY-UHFFFAOYSA-N
Nepeta cataria	BETA-SITOSTEROL|GAMMA-SITOSTEROL	KZJWDPNRJALLNS-UHFFFAOYSA-N
Nepeta cataria	BETA-SITOSTEROL	KZJWDPNRJALLNS-GDQWMHGZSA-N
Nepeta cataria	PULEGONE|(+)-PULEGONE	NZGWDASTMWDZIW-MRVPVSSYSA-N
Nepeta cataria	EPOXYCARYOPHYLLENE|(-)-BETA-CARYOPHYLLENE-EPOXIDE|CARYOPHYLLENEPOXIDE|CARYOPHYLLENE-OXIDE	NVEQFIOZRFFVFW-RGCMKSIDSA-N
Nepeta cataria	5-EPIDEOXYLOGANIC-ACID	DSXFHNSGLYXPNG-MUUFZBHXSA-N
Nepeta cataria	URSOLIC-ACID|URSOLIC-ACID-I|BETA-URSOLIC-ACID	WCGUUGGRBIKTOS-GPOJBZKASA-N
Nepeta cataria	PHOSPHORUS	XYFCBTPGUUZFHI-UHFFFAOYSA-N
Nepeta cataria	BETA-ELEMENE|CYCLOHEXANE|(-)-BETA-ELEMENE|ELEMENE|BETAPELEMENE	OPFTUNCRGUEPRZ-QLFBSQMISA-N
Nepeta cataria	POTASSIUM|POTASSIUM-OXIDE|POTASSIUM-CHLORIDE|K2O	NTTOTNSKUYCDAV-UHFFFAOYSA-N
Nepeta cataria	D-CAMPHOR|CAMPHOR	DSSYKIVIOFKYAU-UHFFFAOYSA-N
Nepeta cataria	DEOXYLOGANIC-ACID	DSXFHNSGLYXPNG-NCZCWLEHSA-N
Nepeta cataria	TETRADECENOIC-ACID|MYRISTIC-ACID|TETRADECANOIC-ACID	TUNFSRHWOTWDNC-UHFFFAOYSA-N
Nepeta cataria	MANGANESE	PWHULOQIROXLJO-UHFFFAOYSA-N
Nepeta cataria	BETA-CARYOPHYLLENE|(E)-CARYOPHYLLENE|(-)-CARYOPHYLLENE	NPNUFJAVOOONJE-IZZDOVSWSA-N
Nepeta cataria	CITRONELLOL	JGQFVRIQXUFPAH-UHFFFAOYSA-N
Nepeta cataria	URSOLIC-ACID|URSOLIC-ACID-I	WCGUUGGRBIKTOS-UHFFFAOYSA-N
Nepeta cataria	BETA-CAROTENE	OENHQHLEOONYIE-LZMNTPPDSA-N
Nepeta cataria	THYMOL|P-CYMENOL	MGSRCZKZVOBKFT-UHFFFAOYSA-N
Nepeta cataria	CITRONELLAL	NEHNMFOYXAPHSD-UHFFFAOYSA-N
Nepeta cataria	(+)-CAMPHOR|D-CAMPHOR|CAMPHOR	DSSYKIVIOFKYAU-XCBNKYQSSA-N
Nepeta cataria	OCIMENE|(Z)-OCIMENE|CIS-BETA-OCIMENE|CIS-OCIMENE|(Z)-BETA-OCIMENE	IHPKGUQCSIINRJ-NTMALXAHSA-N
Nepeta cataria	E-BETA-FANESENE|TRANS-BETA-FARNESENE|FARNESENE|TRANS-FARNESENE|(E)-BETA-FARNESENE	JSNRRGGBADWTMC-NTCAYCPXSA-N
Nepeta cataria	CIS-OCIMENE|OCIMENE	XJPBRODHZKDRCB-NTMALXAHSA-N
Nepeta cataria	PIPERITONE|(-)-PIPERITONE|DL-PIPERITONE	YSTPAHQEHQSRJD-VIFPVBQESA-N
Nepeta cataria	BETA-CAROTENE|PROVITAMIN-A|CAROTENE	OENHQHLEOONYIE-JLTXGRSLSA-N
Nepeta cataria	BETA-NEPETALACTONE|NEPETALACTONE|ALPHA-NEPETALACTONE	ZDKZHVNKFOXMND-CNUIFLNQSA-N
Nepeta cataria	DIHYDRONEPETALACTONE	PLWVFYKDQKCFIY-OGZZVEMFSA-N
Nepeta cataria	BETA-CARYOPHYLLENE|TRANS-CARYOPHYLLENE|ISOCARYOPHYLLENE|(E)-CARYOPHYLLENE|(-)-CARYOPHYLLENE	NPNUFJAVOOONJE-GFUGXAQUSA-N
Nepeta cataria	NEPETALACTONE	ZDKZHVNKFOXMND-UHFFFAOYSA-N
Nepeta cataria	(Z)-3-HEXENYL-BENZOATE|3-HEXENYL-BENZOATE	BCOXBEHFBZOJJZ-ARJAWSKDSA-N
Nepeta cataria	CARYOPHYLLENEPOXIDE|EPOXYCARYOPHYLLENE|CARYOPHYLLENE-EPOXIDE|BETA-CARYOPHYLLENE-OXIDE|EPOXYDIHYDROCARYOPHYLLENE|CARYOPHYLLENE-OXIDE	NVEQFIOZRFFVFW-UHFFFAOYSA-N
Nepeta cataria	PIPERITONE|(-)-PIPERITONE	YSTPAHQEHQSRJD-UHFFFAOYSA-N
Nepeta cataria	(Z)-CITRAL|CITRAL|CITRAL-B|CITRAL-A|NERAL|GERANIAL	WTEVQBCEXWBHNA-YFHOEESVSA-N
Nepeta cataria	CITRONELLOL|BETA-CITRONELLOL	QMVPMAAFGQKVCJ-JTQLQIEISA-N
Nepeta cataria	L-ASCORBIC-ACID|ASCORBIC-ACID	TYQCGQRIZGCHNB-JLAZNSOCSA-N
Nepeta cataria	VIT-B2|RIBOFLAVIN|VITAMIN-B-2	AUNGANRZJHBGPY-SCRDCRAPSA-N
Nepeta cataria	STEARIC-ACID	QIQXTHQIDYTFRH-UHFFFAOYSA-N
Nepeta cataria	PHYTOSTEROL|SITOSTEROL|GAMMA-SITOSTEROL|NIMBOSTEROL|BETA-SITOSTEROL|SITOSTEROL-6'-LINOLYLGLUCOSIDE|(-)-BETA-SITOSTEROL	KZJWDPNRJALLNS-VJSFXXLFSA-N
Nepeta cataria	CIS-TRANS-NEPETALACTONE|NEPETALACTONE|ALPHA-NEPETALACTONE	ZDKZHVNKFOXMND-NBEYISGCSA-N
Nepeta cataria	NEPETOIDIN-B	GFZFUVWXGQWUGX-DGEKEWMVSA-N
Nepeta cataria	CARYOPHYLLENEPOXIDE|BETA-CARYOPHYLLENE-EPOXIDE-I|BETA-CARYOPHYLLENE-EPOXIDE-II|CARYOPHYLLENE-EPOXIDE|BETA-CARYOPHYLLENE-OXIDE|BETA-CARYOPHYLLENE-EPOXIDE|CARYOPHYLLENE-OXIDE	NVEQFIOZRFFVFW-ABHRYQDASA-N
Nepeta cataria	7-DEOXYLOGANIC-ACID	DSXFHNSGLYXPNG-DOZSWALXSA-N
Nepeta cataria	GERANIOL|NEROL	GLZPCOQZEFWAFX-YFHOEESVSA-N
Nepeta cataria	1-5-9-EPI-DEOXYLOGANIC ACID	DSXFHNSGLYXPNG-ZLAROIRYSA-N
Quercus robur	PECTIN	AEMOLEFTQBMNLQ-DTEWXJGMSA-N
Quercus robur	EPIGALLOCATECHOL|(+)-EPIGALLOCATECHIN|GALLOCATECHOL|(+)-GALLOCATECHIN|(-)-EPIGALLOCATECHIN|(-)-GALLOCATECHIN|(+)-GALLOCATECHOL|(DL)-GALLOCATECHIN|(-)-EPI-GALLO-CATECHOL|D-GALLOCATECHIN|GALLOCATECHIN|EPIGALLOCATECHIN	XMOCLSLCDHWDHP-SWLSCSKDSA-N
Quercus robur	LEUCOCYANIDIN	SBZWTSHAFILOTE-RBSFLKMASA-N
Quercus robur	EPICATECHIN|(-)-EPICATECHOL|CATECHIN|EPICATECHOL|(-)-EPICATECHIN	PFTAWBLQPZVEMU-UKRRQHHQSA-N
Quercus robur	FRIEDELIN|FRIEDELAN-3-ONE	OFMXGFHWLZPCFL-SVRPQWSVSA-N
Quercus robur	PHYTOSTEROL|SITOSTEROL|GAMMA-SITOSTEROL|NIMBOSTEROL|BETA-SITOSTEROL|SITOSTEROL-6'-LINOLYLGLUCOSIDE|(-)-BETA-SITOSTEROL	KZJWDPNRJALLNS-VJSFXXLFSA-N
Quercus robur	LEUCODELPHINIDIN	ZEACOKJOQLAYTD-ILXRZTDVSA-N
Quercus robur	EPICATECHIN|EPICATECHOL|(-)-EPICATECHIN|CATECHIN|(-)-EPICATECHOL|DL-CATECHOL	PFTAWBLQPZVEMU-UHFFFAOYSA-N
Quercus robur	QUERCETIN|QUERCETOL	REFJWTPEDVJJIY-UHFFFAOYSA-N
Quercus robur	BETA-SITOSTEROL|GAMMA-SITOSTEROL	KZJWDPNRJALLNS-UHFFFAOYSA-N
Quercus robur	MYO-INOSITOL|L-INOSITOL|MESO-INOSITOL|CHIRO-INOSITOL|SCYLLITOL|INOSITOL	CDAISMWEOUEBRE-UHFFFAOYSA-N
Quercus robur	FRIEDELINOL	XCDQFROEGGNAER-UHFFFAOYSA-N
Quercus robur	FRIEDELINOL|3-BETA-FRIEDELANOL	XCDQFROEGGNAER-PPGXERKRSA-N
Quercus robur	GALLIC-ACID	LNTHITQWFMADLM-UHFFFAOYSA-N
Quercus robur	PECTIC-ACID|PECTIN|CALCIUM-PECTATE|POLYGALACTURONIC-ACID	AEMOLEFTQBMNLQ-BKBMJHBISA-N
Quercus robur	FRIEDELINOL|EPIFRIEDELANOL	XCDQFROEGGNAER-PFOIMGGJSA-N
Quercus robur	GALLOCATECHOL|(-)-GALLOCATECHIN|GALLOCATECHIN|L-GALLOCATECHIN	XMOCLSLCDHWDHP-DOMZBBRYSA-N
Quercus robur	QUERCITOL|(+)-QUERCITOL	IMPKVMRTXBRHRB-MBMOQRBOSA-N
Quercus robur	METHYL-INDOLE-3-ACETATE|INDOLE-3-ACETIC-ACID-METHYL-ESTER	KTHADMDGDNYQRX-UHFFFAOYSA-N
Quercus robur	FRIEDELIN	OFMXGFHWLZPCFL-UHFFFAOYSA-N
Quercus robur	L-(+)-QUERCITOL|QUERCITOL	IMPKVMRTXBRHRB-QRXFDPRISA-N
Quercus robur	BETA-SITOSTEROL	KZJWDPNRJALLNS-GDQWMHGZSA-N
Quercus robur	EPICATECHIN|(+)-CATECHOL|D-CATECHOL|(-)-EPICATECHIN|CATECHIN|(+)-CATECHIN|D-CATECHIN|DL-CATECHOL	PFTAWBLQPZVEMU-DZGCQCFKSA-N
Quercus robur	PHYTOSTEROL|SITOSTEROL|GAMMA-SITOSTEROL|NIMBOSTEROL|BETA-SITOSTEROL|CLIONASTEROL	KZJWDPNRJALLNS-FBZNIEFRSA-N
Quercus robur	INDOLE-ACETIC-ACID|INDOLE-3-ACETIC-ACID|BETA-INDOLEACETIC-ACID	SEOVTRFCIGRIMH-UHFFFAOYSA-N
Quercus robur	FRIEDELIN	OFMXGFHWLZPCFL-QDTNQAACSA-N
Quercus robur	ELLAGIC-ACID	AFSDNFLWKVMVRB-UHFFFAOYSA-N
Quercus robur	LEUCODELPHINIDIN	ZEACOKJOQLAYTD-UHFFFAOYSA-N
Quercus robur	LEUCOCYANIDIN	SBZWTSHAFILOTE-QLFBSQMISA-N
Quercus robur	LEUCOCYANIDIN	SBZWTSHAFILOTE-KKUMJFAQSA-N
Quercus robur	CATECHIN|(-)-CATECHIN	PFTAWBLQPZVEMU-HIFRSBDPSA-N
Quercus robur	(-)-JASMONIC-ACID|JASMONIC-ACID	ZNJFBWYDHIGLCU-HWKXXFMVSA-N
Quercus robur	LEUCOCYANIDIN	SBZWTSHAFILOTE-UHFFFAOYSA-N
Quercus robur	FRIEDELINOL	XCDQFROEGGNAER-VYFOYESCSA-N
Quercus robur	LEUCOCYANIDIN|LEUCOANTHOCYANIDOLE	SBZWTSHAFILOTE-SOUVJXGZSA-N
Rubus fruticosus	PECTIN	AEMOLEFTQBMNLQ-DTEWXJGMSA-N
Rubus fruticosus	DIHYDRO-BETA-SITOSTEROL|SITOSTANOL|DIHYDROSITOSTEROL|SITOSTEROL|STIGMASTANOL	LGJMUZUPVCAVPU-HRJGVYIJSA-N
Rubus fruticosus	SUCCINIC-ACID	KDYFGRWQOYBRFD-UHFFFAOYSA-N
Rubus fruticosus	ANEURINE|THIAMINE|THIAMIN|VITAMIN-B-1|VIT-B-1	JZRWCGZRTZMZEH-UHFFFAOYSA-N
Rubus fruticosus	P-HYDROQUINONE|1,4-BENZENEDIOL|HYDROQUINONE	QIGBRXMKCJKVMJ-UHFFFAOYSA-N
Rubus fruticosus	DIHYDRO-BETA-SITOSTEROL|SITOSTANOL|DIHYDROSITOSTEROL|SITOSTEROL|STIGMASTANOL	LGJMUZUPVCAVPU-KZXGMYDKSA-N
Rubus fruticosus	FERULIC-ACID|TRANS-FERULIC-ACID	KSEBMYQBYZTDHS-HWKANZROSA-N
Rubus fruticosus	2-HYDROXYURSOLIC-ACID	HFGSQOYIOKBQOW-DEKTUAPHSA-N
Rubus fruticosus	L-ASCORBIC-ACID|ASCORBIC-ACID	TYQCGQRIZGCHNB-JLAZNSOCSA-N
Rubus fruticosus	LEVULOSE|BETA-FRUCTOSE	RFSUNEUAIZKAJO-ARQDHWQXSA-N
Rubus fruticosus	BETA-AMYRIN	JFSHUTJDVKUMTJ-QKAPCWNWSA-N
Rubus fruticosus	PROCYANIDIN-B8	GMISZFQPFDAPGI-OSYQBESMSA-N
Rubus fruticosus	MYO-INOSITOL|L-INOSITOL|MESO-INOSITOL|CHIRO-INOSITOL|SCYLLITOL|INOSITOL	CDAISMWEOUEBRE-UHFFFAOYSA-N
Rubus fruticosus	VITAMIN-A	FPIPGXGPPPQFEQ-IOUUIBBYSA-N
Rubus fruticosus	LEVULOSE	LKDRXBCSQODPBY-VRPWFDPXSA-N
Rubus fruticosus	BORON	UORVGPXVDQYIDP-UHFFFAOYSA-N
Rubus fruticosus	BETA-AMYRIN	JFSHUTJDVKUMTJ-XCIKXOPNSA-N
Rubus fruticosus	BETA-AMYRIN	JFSHUTJDVKUMTJ-KOMNAURRSA-N
Rubus fruticosus	2-HYDROXYURSOLIC-ACID	HFGSQOYIOKBQOW-FCPFUEDDSA-N
Rubus fruticosus	NEO-CHLOROGENIC-ACID|NEOCLOROGENIC-ACID|NEOCHLOROGENIC-ACID	CWVRJTMFETXNAD-NXLLHMKUSA-N
Rubus fruticosus	URSOLIC-ACID|URSOLIC-ACID-I|BETA-URSOLIC-ACID	WCGUUGGRBIKTOS-GPOJBZKASA-N
Rubus fruticosus	PHYTOSTEROL|SITOSTEROL|GAMMA-SITOSTEROL|NIMBOSTEROL|BETA-SITOSTEROL|CLIONASTEROL	KZJWDPNRJALLNS-FBZNIEFRSA-N
Rubus fruticosus	(DL)-MALIC-ACID|MALIC-ACID	BJEPYKJPYRNKOW-UHFFFAOYSA-N
Rubus fruticosus	STIGMASTEROL	HCXVJBMSMIARIN-KEJCWXRGSA-N
Rubus fruticosus	ARBUTIN	BJRNKVDFDLYUGJ-RMPHRYRLSA-N
Rubus fruticosus	VIT-B2|RIBOFLAVIN|VITAMIN-B-2	AUNGANRZJHBGPY-SCRDCRAPSA-N
Rubus fruticosus	CHLOROGENIC-ACID	CWVRJTMFETXNAD-VQWGVLBKSA-N
Rubus fruticosus	ARBUTIN	BJRNKVDFDLYUGJ-ZIQFBCGOSA-N
Rubus fruticosus	FRUCTOSE	RHKKZBWRNHGJEZ-ARQDHWQXSA-N
Rubus fruticosus	AMYRIN|BETA-AMYRIN	JFSHUTJDVKUMTJ-QHPUVITPSA-N
Rubus fruticosus	ISOCHLOROGENIC-ACID|CHLOROGENIC-ACID	CWVRJTMFETXNAD-DUXPYHPUSA-N
Rubus fruticosus	CHLOROGENIC-ACID|CAFFEOYLQUINIC-ACID|ISOCHLOROGENIC-ACID|3-O-CAFFEOYLQUINIC-ACID|TRANS-CHLOROGENIC-ACID|3-CAFFEOYLQUINIC-ACID	CWVRJTMFETXNAD-JUHZACGLSA-N
Rubus fruticosus	PECTIC-ACID|PECTIN|CALCIUM-PECTATE|POLYGALACTURONIC-ACID	AEMOLEFTQBMNLQ-BKBMJHBISA-N
Rubus fruticosus	CALCIUM-OXALATE|MAGNESIUM-OXALATE|OXALIC-ACID	MUBZPKHOEPUJKR-UHFFFAOYSA-N
Rubus fruticosus	VITAMIN-A	FPIPGXGPPPQFEQ-OVSJKPMPSA-N
Rubus fruticosus	CHOLINE-SALICYLATE|SALICYLIC-ACID|O-HYDROXYBENZOIC-ACID	YGSDEFSMJLZEOE-UHFFFAOYSA-N
Rubus fruticosus	STIGMASTEROL	HCXVJBMSMIARIN-BGDBIVFESA-N
Rubus fruticosus	BETA-AMYRIN	JFSHUTJDVKUMTJ-UHFFFAOYSA-N
Rubus fruticosus	PHYTOSTEROL|SITOSTEROL|GAMMA-SITOSTEROL|NIMBOSTEROL|BETA-SITOSTEROL|SITOSTEROL-6'-LINOLYLGLUCOSIDE|(-)-BETA-SITOSTEROL	KZJWDPNRJALLNS-VJSFXXLFSA-N
Rubus fruticosus	ASCORBIC-ACID	TYQCGQRIZGCHNB-MVHIGOERSA-N
Rubus fruticosus	2-HYDROXYURSOLIC-ACID	HFGSQOYIOKBQOW-YMSASPJVSA-N
Rubus fruticosus	D-FRUCTOSE|FRUCTOSE	BJHIKXHVCXFQLS-UYFOZJQFSA-N
Rubus fruticosus	L-MALIC-ACID|MALIC-ACID	BJEPYKJPYRNKOW-REOHCLBHSA-N
Rubus fruticosus	URSOLIC-ACID|URSOLIC-ACID-I	WCGUUGGRBIKTOS-UHFFFAOYSA-N
Rubus fruticosus	CHLOROGENIC-ACID	CWVRJTMFETXNAD-VRWXVSRJSA-N
Rubus fruticosus	ARBUTIN	BJRNKVDFDLYUGJ-HSBVKHSESA-N
Rubus fruticosus	LACTIC-ACID|MAGNESIUM-LACTATE	JVTAAEKCZFNVCJ-UHFFFAOYSA-N
Rubus fruticosus	STIGMASTEROL	HCXVJBMSMIARIN-PHZDYDNGSA-N
Rubus fruticosus	URSOLIC-ACID|URSOLIC-ACID-I	WCGUUGGRBIKTOS-APYMDAETSA-N
Rubus fruticosus	STIGMASTEROL	HCXVJBMSMIARIN-HJWRWDBZSA-N
Rubus fruticosus	LACTIC-ACID	JVTAAEKCZFNVCJ-UWTATZPHSA-N
Rubus fruticosus	CITRIC-ACID	KRKNYBCHXYNGOX-UHFFFAOYSA-N
Rubus fruticosus	PROCYANIDIN-B4	XFZJEEAOWLFHDH-RBYKNZBFSA-N
Rubus fruticosus	L-LACTIC-ACID|LACTIC-ACID|MAGNESIUM-LACTATE	JVTAAEKCZFNVCJ-REOHCLBHSA-N
Rubus fruticosus	RIBOFLAVIN|VITAMIN-B-2	AUNGANRZJHBGPY-UHFFFAOYSA-N
Vitis vinifera	L-(+)-TARTARIC-ACID|L-TARTARIC-ACID|TARTARIC-ACID|POTASSIUM-BITARTRATE|(+)-TARTARIC-ACID	FEWJPZIEWOKRBE-JCYAYHJZSA-N
Vitis vinifera	BORON	UORVGPXVDQYIDP-UHFFFAOYSA-N
Vitis vinifera	PHYTOENE	YVLPJIGOMTXXLP-KEKOKYSKSA-N
Vitis vinifera	CHROMIUM	VYZAMTAEIAYCRO-UHFFFAOYSA-N
Vitis vinifera	NIACIN|NICOTINIC-ACID	PVNIIMVLHYAWGP-UHFFFAOYSA-N
Vitis vinifera	L-ASPARTIC-ACID|ASPARTIC-ACID|ASPARAGIC-ACID|ASPARAGINIC-ACID	CKLJMWTZIZZHCS-REOHCLBHSA-N
Vitis vinifera	ISOLEUCINE	AGPKZVBTJJNPAG-UHFFFAOYSA-N
Vitis vinifera	IONONE|IONENE|BETA-IONONE	PSQYTAPXSHCGMF-BQYQJAHWSA-N
Vitis vinifera	LUPEOL	MQYXUWHLBZFQQO-UHFFFAOYSA-N
Vitis vinifera	LINOLEIC-ACID	OYHQOLUKZRVURQ-IXWMQOLASA-N
Vitis vinifera	GALLIC-ACID	LNTHITQWFMADLM-UHFFFAOYSA-N
Vitis vinifera	CYANIN|CYANIDIN-3,5-DIGLUCOSIDE	RDFLLVCQYHQOBU-DHXMCCLBSA-O
Vitis vinifera	PROCYANIDIN-B7	GMISZFQPFDAPGI-GOUWLXHGSA-N
Vitis vinifera	N-6-ISOPENT-2-ENYL-ADENOSINE|N(6)-ISO-PENTENYL-ADENINE	USVMJSALORZVDV-UHFFFAOYSA-N
Vitis vinifera	STIGMASTEROL	HCXVJBMSMIARIN-HJWRWDBZSA-N
Vitis vinifera	EPICATECHIN|(+)-CATECHOL|D-CATECHOL|(-)-EPICATECHIN|CATECHIN|(+)-CATECHIN|D-CATECHIN|DL-CATECHOL	PFTAWBLQPZVEMU-DZGCQCFKSA-N
Vitis vinifera	STACHYOSE	UQZIYBXSHAGNOE-XNSRJBNMSA-N
Vitis vinifera	TRANS-COUTARIC-ACID	INYJZRKTYXTZHP-NNPIPJJVSA-N
Vitis vinifera	EPICATECHIN-(4BETA->6)-EPICATECHIN-(4BETA->8)-EPICATECHIN|EPICATECHIN-(4BETA->6)-EPICATECHIN-(4BETA->8)-CATECHIN	SXEONTJNLWOUBB-UPQOECPJSA-N
Vitis vinifera	DL-TERPINEOL|D-ALPHA-TERPINEOL|TERPINENOL|ALPHA-TERPINEOL|D-TERPINEOL|I-TERPINEOL|TERPINEOL	WUOACPNHFRMFPN-UHFFFAOYSA-N
Vitis vinifera	MALVIDIN-3-(6''-ACETYLGLUCOSIDE)	WGYWEDJQQFKGID-VBLNTBNVSA-O
Vitis vinifera	PYRROLIDINE	RWRDLPDLKQPQOW-UHFFFAOYSA-N
Vitis vinifera	SYRINGIC-ACID	JMSVCTWVEWCHDZ-UHFFFAOYSA-N
Vitis vinifera	HIRSUTRIN	OVSQVDMCBVZWGM-IDRAQACASA-N
Vitis vinifera	BIOTIN	YBJHBAHKTGYVGT-ZKWXMUAHSA-N
Vitis vinifera	PROCYANIDIN-B-7	GMISZFQPFDAPGI-JJYFIROESA-N
Vitis vinifera	ALPHA-AMYRIN	FSLPMRQHCOLESF-UHFFFAOYSA-N
Vitis vinifera	URSOLIC-ACID|URSOLIC-ACID-I	WCGUUGGRBIKTOS-APYMDAETSA-N
Vitis vinifera	PROCYANIDIN-B-5	GMISZFQPFDAPGI-CVJZBMGUSA-N
Vitis vinifera	BETA-TOCOTRIENOL	FGYKUFVNYVMTAM-WAZJVIJMSA-N
Vitis vinifera	RIBOFLAVIN|VITAMIN-B-2	AUNGANRZJHBGPY-UHFFFAOYSA-N
Vitis vinifera	QUERCETRIN|QUERCETIN-3-RHAMNOSIDE|QUERCETIN-3-O-RHAMNOSIDE|QUERCITRIN	OXGUCUVFOIWWQJ-XIMSSLRFSA-N
Vitis vinifera	(-)-JASMONIC-ACID|JASMONIC-ACID	ZNJFBWYDHIGLCU-HWKXXFMVSA-N
Vitis vinifera	DIHYDROZEATIN	XXFACTAYGKKOQB-UHFFFAOYSA-N
Vitis vinifera	BETULINIC-ACID	QGJZLNKBHJESQX-UHFFFAOYSA-N
Vitis vinifera	TRYPTOPHAN|L-(-)-TRYPTOPHAN	QIVBCDIJIAJPQS-SECBINFHSA-N
Vitis vinifera	CHINIC-ACID|QUINIC-ACID|(-)-QUINIC-ACID	AAWZDTNXLSGCEK-LNVDRNJUSA-N
Vitis vinifera	D-GALACTOURONIC-ACID|GALACTURONIC-ACID|D-GALACTURONIC-ACID	IAJILQKETJEXLJ-RSJOWCBRSA-N
Vitis vinifera	ALPHA-CAROTENE	ANVAOWXLWRTKGA-NTXLUARGSA-N
Vitis vinifera	LUTEIN|XANTHOPHYLL|LUTEIN-ESTER	KBPHJBAIARWVSC-DKLMTRRASA-N
Vitis vinifera	3-OXO-OLEAN-12-EN-28-OIC-ACID	FMIMFCRXYXVFTA-YUVMXPMLSA-N
Vitis vinifera	3-OXO-ALPHA-IONOL	MDCGEAGEQVMWPE-AATRIKPKSA-N
Vitis vinifera	SERINE	MTCFGRXMJLQNBG-UHFFFAOYSA-N
Vitis vinifera	VALINE	KZSNJWFQEVHDMF-BYPYZUCNSA-N
Vitis vinifera	ASTILBIN	ZROGCCBNZBKLEL-UHFFFAOYSA-N
Vitis vinifera	PHYTOSTEROL|SITOSTEROL|GAMMA-SITOSTEROL|NIMBOSTEROL|BETA-SITOSTEROL|CLIONASTEROL	KZJWDPNRJALLNS-FBZNIEFRSA-N
Vitis vinifera	HYPERIN|QUERCETIN-3-O-GALACTOSIDE|HYPEROSIDE	OVSQVDMCBVZWGM-DTGCRPNFSA-N
Vitis vinifera	FRUCTOSE	RHKKZBWRNHGJEZ-ARQDHWQXSA-N
Vitis vinifera	EPSILOM-TARAXASTEROL|TARAXASTEROL	XWMMEBCFHUKHEX-VPUBHQHASA-N
Vitis vinifera	BETA-GLUCOSE|D-GLUCOSE|DEXTROSE|GLUCOSE	WQZGKKKJIJFFOK-VFUOTHLCSA-N
Vitis vinifera	MAGNESIUM	RSHAOIXHUHAZPM-UHFFFAOYSA-N
Vitis vinifera	TARAXEROL	GGGUGZHBAOMSFJ-MKWCDXGHSA-N
Vitis vinifera	FOLACIN|FOLATE|FOLIC-ACID	OVBPIULPVIDEAO-LBPRGKRZSA-N
Vitis vinifera	(+)-LIMONENE|(+)-S-CARVONE|LIMONENE|CARVENE|DIPENTENE|(-)-LIMONENE|D-LIMONENE	XMGQYMWWDOXHJM-JTQLQIEISA-N
Vitis vinifera	ROSEOSIDE|CORCHOIONOSIDE-C	SWYRVCGNMNAFEK-PUVRWCMWSA-N
Vitis vinifera	PROCYANIDIN-B-3	XFZJEEAOWLFHDH-VUGKQVTMSA-N
Vitis vinifera	LIMONENE|LINONENE|L-LIMONENE|DIPENTENE|(-)-LIMONENE|(+)-MENTHA-1,8-DIENE|DL-LIMONENE|TERPINOLENE	XMGQYMWWDOXHJM-UHFFFAOYSA-N
Vitis vinifera	TARTARIC-ACID	FEWJPZIEWOKRBE-LWMBPPNESA-N
Vitis vinifera	TOCOPHEROL|GAMMA-TOCOPHEROL	QUEDXNHFTDJVIY-DQCZWYHMSA-N
Vitis vinifera	GLYCOLIC-ACID	AEMRFAOFKBGASW-UHFFFAOYSA-N
Vitis vinifera	(+)-VOMIFOLIOL|VOMIFOLIOL	KPQMCAKZRXOZLB-KOIHBYQTSA-N
Vitis vinifera	MALVIDIN-3-(6''-P-COUMARYLGLUCOSIDE)	HXQOVGDXCHFLOP-KWNZYCHBSA-O
Vitis vinifera	OLEANOLIC-ACID	AOWMBRPPHGNFDX-HPPBOAITSA-N
Vitis vinifera	DEHYDROVOMIFOLIOL	JJRYPZMXNLLZFH-URWSZGRFSA-N
Vitis vinifera	CYSTINE	LEVWYRKDKASIDU-UHFFFAOYSA-N
Vitis vinifera	STACHYOSE	UQZIYBXSHAGNOE-USOSMYMVSA-N
Vitis vinifera	PROTOCATECHUIC-ACID|3,4-DIHYDROXYBENZOIC-ACID|O-PROTOCATECHUIC-ACID	YQUVCSBJEUQKSH-UHFFFAOYSA-N
Vitis vinifera	PANTOTHENIC-ACID	GHOKWGTUZJEAQD-ZETCQYMHSA-N
Vitis vinifera	ALPHA-ALANINE|ALANINE|L-ALANINE	QNAYBMKLOCPYGJ-REOHCLBHSA-N
Vitis vinifera	AMYRIN|ALPHA-AMYRIN	FSLPMRQHCOLESF-SFMCKYFRSA-N
Vitis vinifera	LUTEIN-5,6-EPOXIDE|ISOLUTEIN|5-6-EPOXYLUTEIN|TRANS-LUTEIN-5,6-EPOXIDE	DYUUPIKEWLHQGQ-FJOIUHRLSA-N
Vitis vinifera	CYANIDIN-3-(6''-ACETYLGLUCOSIDE)	HBXXDBKJLPLXPR-ZFVIQDPVSA-O
Vitis vinifera	RAFFINOSE	MUPFEKGTMRGPLJ-RMMQSMQOSA-N
Vitis vinifera	DEXTROSE|GLUCOSE	WQZGKKKJIJFFOK-GASJEMHNSA-N
Vitis vinifera	(+)-EPICATECHIN|EPICATECHIN|(-)-EPICATECHIN	PFTAWBLQPZVEMU-ZFWWWQNUSA-N
Vitis vinifera	NITROGEN	IJGRMHOSHXDMSA-UHFFFAOYSA-N
Vitis vinifera	MONOCAFFEOYLTARTARIC-ACID	SWGKAHCIOQPKFW-OVXAFGJRSA-N
Vitis vinifera	PEONIDIN-3-(6''-P-COUMARYLGLUCOSIDE)	MFHMTMFSFNMTFQ-YMLRRHDESA-O
Vitis vinifera	CAMPESTEROL	SGNBVLSWZMBQTH-PODYLUTMSA-N
Vitis vinifera	CADMIUM	BDOSMKKIYDKNTQ-UHFFFAOYSA-N
Vitis vinifera	LEUCOCYANIDIN|LEUCOANTHOCYANIDOLE	SBZWTSHAFILOTE-SOUVJXGZSA-N
Vitis vinifera	CYANIDIN	VEVZSMAEJFVWIL-UHFFFAOYSA-O
Vitis vinifera	NEOXANTHIN-A|CIS-NEOXANTHIN|NEOXANTHIN	PGYAYSRVSAJXTE-FTLOKQSXSA-N
Vitis vinifera	MELIBIOSE	DLRVVLDZNNYCBX-ABXHMFFYSA-N
Vitis vinifera	TANNIC-ACID	LRBQNJMCXXYXIU-PPKXGCFTSA-N
Vitis vinifera	LUTEIN	KBPHJBAIARWVSC-RGZFRNHPSA-N
Vitis vinifera	FERULIC-ACID|TRANS-FERULIC-ACID	KSEBMYQBYZTDHS-HWKANZROSA-N
Vitis vinifera	BETA-TOCOPHEROL	WGVKWNUPNGFDFJ-DQCZWYHMSA-N
Vitis vinifera	PEONIDIN	XFDQJKDGGOEYPI-UHFFFAOYSA-O
Vitis vinifera	SERINE	MTCFGRXMJLQNBG-UWTATZPHSA-N
Vitis vinifera	PICEID|TRANS-PICEID	HSTZMXCBWJGKHG-CUYWLFDKSA-N
Vitis vinifera	GIBBERELLIC-ACID|GIBBERELLIN-A3	IXORZMNAPKEEDV-OBDJNFEBSA-N
Vitis vinifera	CIS-PICEID|PICEID	HSTZMXCBWJGKHG-BUFXCDORSA-N
Vitis vinifera	QUERCETIN|QUERCETOL	REFJWTPEDVJJIY-UHFFFAOYSA-N
Vitis vinifera	TRANS-ZEATIN|ZEATIN	UZKQTCBAMSWPJD-FARCUNLSSA-N
Vitis vinifera	CRYPTOXANTHIN	DMASLKHVQRHNES-QQGJMDNJSA-N
Vitis vinifera	BIOTIN	YBJHBAHKTGYVGT-UHFFFAOYSA-N
Vitis vinifera	PHYTOFLUENE	OVSVTCFNLSGAMM-IQEMYQFOSA-N
Vitis vinifera	SHIKIMIC-ACID	JXOHGGNKMLTUBP-UHFFFAOYSA-N
Vitis vinifera	GALACTOSE|D-GALACTOSE	WQZGKKKJIJFFOK-FPRJBGLDSA-N
Vitis vinifera	BARIUM	MUBOSUMMMUSVEO-UHFFFAOYSA-N
Vitis vinifera	NICKEL	PXHVJJICTQNCMI-UHFFFAOYSA-N
Vitis vinifera	L-ASCORBIC-ACID|ASCORBIC-ACID	TYQCGQRIZGCHNB-JLAZNSOCSA-N
Vitis vinifera	3,7-DIMETHYL-OCTA-1,5,7-TRIEN-3-OL|HOTRIENOL	ZJIQIJIQBTVTDY-VOTSOKGWSA-N
Vitis vinifera	MERCURY	QSHDDOUJBYECFT-UHFFFAOYSA-N
Vitis vinifera	DELPHINIDIN-3-GLUCOSIDE|DELPHINIDIN-3-MONOGLUCOSIDE|DELPHINIDIN-3-0-BETA-D-GLUCOSIDE|MYRTILLIN|DELPHINIDIN-3-O-BETA-D-GLUCOSIDE|MYRTILLIN-A|DELPHINIDIN-3-O-GLUCOSIDE	XENHPQQLDPAYIJ-PEVLUNPASA-O
Vitis vinifera	TYROSINE	OUYCCCASQSFEME-QMMMGPOBSA-N
Vitis vinifera	DIHYDROZEATIN	XXFACTAYGKKOQB-ZETCQYMHSA-N
Vitis vinifera	SULFUR	RWSOTUBLDIXVET-UHFFFAOYSA-N
Vitis vinifera	L-LACTIC-ACID|LACTIC-ACID|MAGNESIUM-LACTATE	JVTAAEKCZFNVCJ-REOHCLBHSA-N
Vitis vinifera	MUTATOXANTHIN	IFYMEZNJCAQUME-PYFPVDPYSA-N
Vitis vinifera	3-O-GALLOYLEPICATECHIN-(4BETA->8)-CATECHIN|3-O-GALLOYLEPICATECHIN-(4BETA->8)-EPICATECHIN	BXWABJPTCUDBMM-BICGMBOKSA-N
Vitis vinifera	HYPERIN|QUERCETIN-3-O-GALACTOSIDE|HYPEROSIDE	OVSQVDMCBVZWGM-CAWYGJOUSA-N
Vitis vinifera	PHYTOENE|15,15'-CIS-PHYTOENE	YVLPJIGOMTXXLP-BHLJUDRVSA-N
Vitis vinifera	MELIBIOSE	DLRVVLDZNNYCBX-LGHYCPABSA-N
Vitis vinifera	ASRAGALIN|KAEMPFEROL-3-O-BETA-D-GLUCOSIDE|KAEMPFEROL-3-O-GLUCOSIDE|ASTRAGALIN|KAEMPFEROL-3-0-GLUCOSIDE	JPUKWEQWGBDDQB-QSOFNFLRSA-N
Vitis vinifera	WATER	XLYOFNOQVPJJNP-UHFFFAOYSA-N
Vitis vinifera	XYLOSE	SRBFZHDQGSBBOR-SQOUGZDYSA-N
Vitis vinifera	ALUMINUM	AZDRQVAHHNSJOQ-UHFFFAOYSA-N
Vitis vinifera	CARVENE|L-LIMONENE|LIMONENE|(-)-LIMONENE|DIPENTENE	XMGQYMWWDOXHJM-SNVBAGLBSA-N
Vitis vinifera	TANNIC-ACID	LRBQNJMCXXYXIU-UHFFFAOYSA-N
Vitis vinifera	EPSILON-VINIFERIN	FQWLMRXWKZGLFI-QMXRTTGVSA-N
Vitis vinifera	JASMONIC-ACID	ZNJFBWYDHIGLCU-CMIOBCHKSA-N
Vitis vinifera	GALLOCATECHOL|(-)-GALLOCATECHIN|GALLOCATECHIN|L-GALLOCATECHIN	XMOCLSLCDHWDHP-DOMZBBRYSA-N
Vitis vinifera	BETA-AMYRIN	JFSHUTJDVKUMTJ-XCIKXOPNSA-N
Vitis vinifera	TIN	OLGIDLDDXHSYFE-UHFFFAOYSA-N
Vitis vinifera	PANTOTHENIC-ACID	GHOKWGTUZJEAQD-UHFFFAOYSA-N
Vitis vinifera	ISOPENTYL-AMINE|ISOAMYL-AMINE	BMFVGAAISNGQNM-UHFFFAOYSA-N
Vitis vinifera	THREONINE	AYFVYJQAPQTCCC-UHFFFAOYSA-N
Vitis vinifera	ZIRCONIUM	MCMNRKCIXSYSNV-UHFFFAOYSA-N
Vitis vinifera	VIT-B2|RIBOFLAVIN|VITAMIN-B-2	AUNGANRZJHBGPY-SCRDCRAPSA-N
Vitis vinifera	ZINC	HCHKCACWOHOZIP-UHFFFAOYSA-N
Vitis vinifera	ALPHA-CRYPTOXANTHIN|ZEINOXANTHIN|CRYPTOXANTHIN	NBZANZVJRKXVBH-NHWXEJKLSA-N
Vitis vinifera	ZEAXANTHIN	JKQXZKUSFCKOGQ-YOPUJPICSA-N
Vitis vinifera	CIS-RESVERATROL	KBCXAMRWBZPGGN-OWOJBTEDSA-N
Vitis vinifera	TYROSINE	JZKXXXDKRQWDET-UHFFFAOYSA-N
Vitis vinifera	STIGMASTEROL	HCXVJBMSMIARIN-PHZDYDNGSA-N
Vitis vinifera	N(6)-ISO-PENTENYL-ADENINE	KGVAAXZLUAKZEO-UHFFFAOYSA-N
Vitis vinifera	GIBBERELLIN-A-19|GIBBERELLIN-A19	VNCQCPQAMDQEBY-YTJHIPEWSA-N
Vitis vinifera	CYCLOARTENOL	ONQRKEUAIJMULO-UHFFFAOYSA-N
Vitis vinifera	CATECHIN-(4ALPHA->8)-EPICATECHIN-3-O-GALLATE	VLFKNLZNDSEVBZ-LBSACNJESA-N
Vitis vinifera	DIETHYL-AMINE	HPNMFZURTQLUMO-UHFFFAOYSA-N
Vitis vinifera	OLEIC-ACID	ZQPPMHVWECSIRJ-KTKRTIGZSA-N
Vitis vinifera	ARSENIC	RBFQJDQYXXHULB-UHFFFAOYSA-N
Vitis vinifera	EPICATECHIN-(4BETA->8)-3-O-GALLOYLEPICATECHIN-(4BETA->8)-CATECHIN	XLGRDEOFHNGKLV-SQFGUNSKSA-N
Vitis vinifera	(-)-EPICATECHIN-GALLATE|(-)-EPICATECHOL-GALLATE|EPICATECHIN-3-O-GALLATE|EPICATECHIN-GALLATE|EPICATECHIN-3-GALLATE|(-)-EPICATECHIN-3-O-GALLATE|(-)-EPICATECHIN-3-GALLATE	LSHVYAFMTMFKBA-TZIWHRDSSA-N
Vitis vinifera	EPICATECHIN|(-)-EPICATECHOL|CATECHIN|EPICATECHOL|(-)-EPICATECHIN	PFTAWBLQPZVEMU-UKRRQHHQSA-N
Vitis vinifera	D-XYLOSE|XYLOSE	PYMYPHUHKUWMLA-VPENINKCSA-N
Vitis vinifera	OENIN	PXUQTDZNOHRWLI-JJYSZZJESA-O
Vitis vinifera	BETULIC-ACID|BETULINIC-ACID	QGJZLNKBHJESQX-FZFNOLFKSA-N
Vitis vinifera	EPSILOM-TARAXASTEROL|TARAXASTEROL	XWMMEBCFHUKHEX-ZJJHUPNDSA-N
Vitis vinifera	TRYPTOPHAN|L-TRYPTOPHAN|L-(-)-TRYPTOPHAN	QIVBCDIJIAJPQS-VIFPVBQESA-N
Vitis vinifera	CAFFEIC-ACID|TRANS-CAFFEIC-ACID|DIHYDROXYCINNAMIC-ACID|3,4-DIHYDROXYCINNAMIC-ACID	QAIPRVGONGVQAS-DUXPYHPUSA-N
Vitis vinifera	VIOLEOXANTHIN|VIOLAXANTHIN	SZCBXWMUOPQSOX-VPYIVGMTSA-N
Vitis vinifera	QUERCETIN-3-O-GLUCOSIDE|TRIFOLIIN|HIRSUTRIN|ISOQUERCETIN|ISOQUERCITRIN|QUERCETOL-3-GLUCOSIDE|QUERCETIN-3-BETA-D-GLUCOSIDE|QUERCETIN-3-O-BETA-D-GLUCOSIDE|QUERCETIN-3-O-BETA-D-GLUCOPYRANOSIDE	OVSQVDMCBVZWGM-QSOFNFLRSA-N
Vitis vinifera	PROCYANIDIN-B-6	GMISZFQPFDAPGI-ZBRHZRBFSA-N
Vitis vinifera	CYSTINE-(HALF)|CYSTEINE|CYSTINE|L-CYSTEINE	XUJNEKJLAYXESH-REOHCLBHSA-N
Vitis vinifera	PROCYANIDIN-B8	GMISZFQPFDAPGI-OSYQBESMSA-N
Vitis vinifera	ZEATIN-RIBOSIDE	GOSWTRUMMSCNCW-KRXBUXKQSA-N
Vitis vinifera	RAFFINOSE	MUPFEKGTMRGPLJ-QPRLJEHOSA-N
Vitis vinifera	PROCYANIDIN-C1	MOJZMWJRUKIQGL-FQVWZTFVSA-N
Vitis vinifera	CYCLOARTENOL	ONQRKEUAIJMULO-IAWHQMGRSA-N
Vitis vinifera	L-ARGININE|ARGININE	ODKSFYDXXFIFQN-BYPYZUCNSA-N
Vitis vinifera	PROCYANIDIN-B-1	XFZJEEAOWLFHDH-UKWJTHFESA-N
Vitis vinifera	BUTANOIC-ACID|BUTYRIC-ACID	FERIUCNNQQJTOY-UHFFFAOYSA-N
Vitis vinifera	TANNIC-ACID	LRBQNJMCXXYXIU-QWKBTXIPSA-N
Vitis vinifera	CRYPTOCHLOROGENIC-ACID	GYFFKZTYYAFCTR-YMQLDNTMSA-N
Vitis vinifera	TRANS-CINNAMIC-ACID|CINNAMIC-ACID	WBYWAXJHAXSJNI-VOTSOKGWSA-N
Vitis vinifera	MALVIDIN-3-GLUCOSIDE-4-VINYLGUAIACOL	QARRSDFIUQJIHX-QPZIMESWSA-O
Vitis vinifera	EPICATECHIN-(4BETA->8)-3-O-GALLOYLEPICATECHIN-(4BETA->8)-EPICATECHIN-3-O-GALLATE	CSQVLCNLSUIXDX-JKOMPVHASA-N
Vitis vinifera	LYCOPENE	OAIJSZIZWZSQBC-GYZMGTAESA-N
Vitis vinifera	LYSINE|L-(+)-LYSINE	KDXKERNSBIXSRK-RXMQYKEDSA-N
Vitis vinifera	ANTHEROXANTHIN|ANTHERAXANTHIN	OFNSUWBAQRCHAV-OYQUVCAXSA-N
Vitis vinifera	ALPHA-TOCOTRIENOL	RZFHLOLGZPDCHJ-MXTWWLCESA-N
Vitis vinifera	TARAXASTEROL	XWMMEBCFHUKHEX-CWFQSGEHSA-N
Vitis vinifera	4-HYDROXYBENZALDEHYDE|P-HYDROXYBENZALDEHYDE	RGHHSNMVTDWUBI-UHFFFAOYSA-N
Vitis vinifera	N-NONACOSANE|NONACOSANE	IGGUPRCHHJZPBS-UHFFFAOYSA-N
Vitis vinifera	GLUTAMIC-ACID	WHUUTDBJXJRKMK-GSVOUGTGSA-N
Vitis vinifera	PETUNIDIN-3-O-BETA-D-GLUCOPYRANOSIDE	CCQDWIRWKWIUKK-QKYBYQKWSA-O
Vitis vinifera	SILICON	BLRPTPMANUNPDV-UHFFFAOYSA-N
Vitis vinifera	PROCYANIDIN-B1|PROCYANIDIN-B2|PROANTHOCYANIDIN-B2	XFZJEEAOWLFHDH-NFJBMHMQSA-N
Vitis vinifera	QUINIC-ACID	AAWZDTNXLSGCEK-FZTZQNQQSA-N
Vitis vinifera	PEONIN	IPVSUYLZIAYTOK-VWVAXHKFSA-O
Vitis vinifera	QUERCIMERETRIN|QUERCIMERITRIN	BBFYUPYFXSSMNV-LQPIGNGESA-N
Vitis vinifera	PETUNIDIN-3-(6''-P-COUMARYLGLUCOSIDE)	KTFQEFWNLAUGAX-NUNSGGFLSA-O
Vitis vinifera	EPSILOM-TARAXASTEROL|TARAXASTEROL	XWMMEBCFHUKHEX-UHFFFAOYSA-N
Vitis vinifera	BETA-AMYRIN	JFSHUTJDVKUMTJ-KOMNAURRSA-N
Vitis vinifera	ALPHA-TOCOPHEROL|VITAMIN-E	GVJHHUAWPYXKBD-SYZUXVNWSA-N
Vitis vinifera	ERGOSTEROL	DNVPQKQSNYMLRS-APGDWVJJSA-N
Vitis vinifera	GIBBERELLIN-A1	JLJLRLWOEMWYQK-OBDJNFEBSA-N
Vitis vinifera	OENIN	PXUQTDZNOHRWLI-UHFFFAOYSA-O
Vitis vinifera	LUTEIN	KBPHJBAIARWVSC-NSIPBSJQSA-N
Vitis vinifera	VITAMIN-K-1|PHYLLOQUINONE	MBWXNTAXLNYFJB-LKUDQCMESA-N
Vitis vinifera	MANGANESE	PWHULOQIROXLJO-UHFFFAOYSA-N
Vitis vinifera	CINNAMIC-ALDEHYDE|TRANS-CINNAMALDEHYDE|CINNAMALDEHYDE	KJPRLNWUNMBNBZ-QPJJXVBHSA-N
Vitis vinifera	BETA-CAROTENE	OENHQHLEOONYIE-LZMNTPPDSA-N
Vitis vinifera	PALLIDOL	YNVJOQCPHWKWSO-NFFAYCCRSA-N
Vitis vinifera	MALVIDIN-3-O-GLUCOSIDE|MALVIDIN-3-GLUCOSIDE	PXUQTDZNOHRWLI-OXUVVOBNSA-O
Vitis vinifera	RUTIN	IKGXIBQEEMLURG-FNKLJWKFSA-N
Vitis vinifera	PECTIN	AEMOLEFTQBMNLQ-DTEWXJGMSA-N
Vitis vinifera	DIHYDROFURAN-I	JKTCBAGSMQIFNL-UHFFFAOYSA-N
Vitis vinifera	TITANIUM	RTAQQCXQSZGOHL-UHFFFAOYSA-N
Vitis vinifera	PROCYANIDIN-B6	GMISZFQPFDAPGI-AQHQUFFSSA-N
Vitis vinifera	I-TERPINEOL|TERPINEOL|ALPHA-TERPINEOL	WUOACPNHFRMFPN-VIFPVBQESA-N
Vitis vinifera	MALVIDIN-3-(P-COUMAROYLGLUCOSIDE)	HXQOVGDXCHFLOP-LWXJURJYSA-O
Vitis vinifera	TARAXASTEROL|PSI-TARAXASTEROL	NGFFRJBGMSPDMS-VPUBHQHASA-N
Vitis vinifera	L-HISTIDINE|HISTIDINE	HNDVDQJCIGZPNO-YFKPBYRVSA-N
Vitis vinifera	BETA-AMYRIN	JFSHUTJDVKUMTJ-QKAPCWNWSA-N
Vitis vinifera	QUERCITIN-3-0-BETA-D-GLUCOSIDE|QUERCETIN-3-RHAMNOGLUCOSIDE|VIOLAQUERCITRIN|QUERCETIN-3-O-RUTINOSIDE|RUTOSIDE|RUTIN|QUERCITIN-3-0-RHAMNOGLUCOSIDE	IKGXIBQEEMLURG-NVPNHPEKSA-N
Vitis vinifera	HYPERIN|QUERCETIN-3-O-GALACTOSIDE|ISOQUERCITRIN|HYPEROSIDE	OVSQVDMCBVZWGM-UHFFFAOYSA-N
Vitis vinifera	CITRONELLOL|BETA-CITRONELLOL	QMVPMAAFGQKVCJ-JTQLQIEISA-N
Vitis vinifera	LUPEOL	MQYXUWHLBZFQQO-JGGBMTAGSA-N
Vitis vinifera	BETA-CAROTENE|PROVITAMIN-A|CAROTENE	OENHQHLEOONYIE-JLTXGRSLSA-N
Vitis vinifera	ASTILBIN	ZROGCCBNZBKLEL-FHXNIQKESA-N
Vitis vinifera	ALPHA-LINOLEIC-ACID|LINOLEIC-ACID	OYHQOLUKZRVURQ-HZJYTTRNSA-N
Vitis vinifera	PHENYLALANINE	COLNVLDHVKWLRT-MRVPVSSYSA-N
Vitis vinifera	PROLINE|PYRROLIDINE-CARBOXYLIC-ACID	ONIBWKKTOPOVIA-BYPYZUCNSA-N
Vitis vinifera	MALVIDIN-3-GLUCOSIDE-PYRUVATE	QVULQDHVHOUFCX-TYHXJLICSA-O
Vitis vinifera	CAMPESTEROL	SGNBVLSWZMBQTH-ZRUUVFCLSA-N
Vitis vinifera	CHLOROGENIC-ACID	CWVRJTMFETXNAD-VQWGVLBKSA-N
Vitis vinifera	CITRIC-ACID	KRKNYBCHXYNGOX-UHFFFAOYSA-N
Vitis vinifera	EPSILON-VINIFERIN	FQWLMRXWKZGLFI-DAFODLJHSA-N
Vitis vinifera	PETUNIDIN	AFOLOMGWVXKIQL-UHFFFAOYSA-O
Vitis vinifera	DIHYDROPHASEIC-ACID-4'-BETA-D-GLUCOSIDE	UHHVHDDICOEBTQ-ONNSXRCISA-N
Vitis vinifera	PHYTOSTEROL|SITOSTEROL|GAMMA-SITOSTEROL|NIMBOSTEROL|BETA-SITOSTEROL|SITOSTEROL-6'-LINOLYLGLUCOSIDE|(-)-BETA-SITOSTEROL	KZJWDPNRJALLNS-VJSFXXLFSA-N
Vitis vinifera	PHOSPHATIDYL-SERINE	UNJJBGNPUUVVFQ-NXEZZACHSA-N
Vitis vinifera	PETUNIN	KLRABYJGMPNMSA-ZUUMSKAQSA-O
Vitis vinifera	SHIKIMIC-ACID	JXOHGGNKMLTUBP-HSUXUTPPSA-N
Vitis vinifera	PEONIDIN-3-(6''-ACETYLGLUCOSIDE)	MBSKDCPWFSMEFD-AQKHVRLOSA-O
Vitis vinifera	ANEURINE|THIAMINE|THIAMIN|VITAMIN-B-1|VIT-B-1	JZRWCGZRTZMZEH-UHFFFAOYSA-N
Vitis vinifera	METHIONINE	FFEARJCKVFRZRR-UHFFFAOYSA-N
Vitis vinifera	2,6-DIMETHYL-7-OCTENE-2,3,6-TRIOL	CNYFGLAROLNGDG-SCZZXKLOSA-N
Vitis vinifera	RESVERATROL|CIS-RESVERATROL	LUKBXSAWLPMMSZ-UPHRSURJSA-N
Vitis vinifera	CINNAMALDEHYDE	KJPRLNWUNMBNBZ-DAXSKMNVSA-N
Vitis vinifera	CYANIDIN-3-O-BETA-D-GLUCOSIDE|CYANIDIN-3-O-GLUCOSIDE	KKJMOABHCCNIEF-AVPDHNOJSA-N
Vitis vinifera	ASTILBIN	ZROGCCBNZBKLEL-MPRHSVQHSA-N
Vitis vinifera	PAEONIDIN-3-O-BETA-D-GLUCOSIDE|PEONIDIN-3-O-BETA-D-GLUCOSIDE	YDAXWELPEMHDRL-UHFFFAOYSA-O
Vitis vinifera	ETHANOL	LFQSCWFLJHTTHZ-UHFFFAOYSA-N
Vitis vinifera	NEOXANTHIN-A|TRANS-NEOXANTHIN|NEOXANTHIN	PGYAYSRVSAJXTE-SPHYDKQBSA-N
Vitis vinifera	IRON-OXIDE|IRON	XEEYBQQBJWHFJM-UHFFFAOYSA-N
Vitis vinifera	ISOCHLOROGENIC-ACID	CWVRJTMFETXNAD-BMNNCGMMSA-N
Vitis vinifera	(DL)-MALIC-ACID|MALIC-ACID	BJEPYKJPYRNKOW-UHFFFAOYSA-N
Vitis vinifera	PECTIC-ACID|CALCIUM-PECTATE|POLYGALACTURONIC-ACID	AEMOLEFTQBMNLQ-YMDCURPLSA-N
Vitis vinifera	EPIGALLOCATECHOL|(+)-EPIGALLOCATECHIN|GALLOCATECHOL|(+)-GALLOCATECHIN|(-)-EPIGALLOCATECHIN|(-)-GALLOCATECHIN|(+)-GALLOCATECHOL|(DL)-GALLOCATECHIN|(-)-EPI-GALLO-CATECHOL|D-GALLOCATECHIN|GALLOCATECHIN|EPIGALLOCATECHIN	XMOCLSLCDHWDHP-SWLSCSKDSA-N
Vitis vinifera	ASPARTIC-ACID	CKLJMWTZIZZHCS-UWTATZPHSA-N
Vitis vinifera	ENGELETIN	VQUPQWGKORWZII-DNDBBYSWSA-N
Vitis vinifera	ISOCHLOROGENIC-ACID|CHLOROGENIC-ACID	CWVRJTMFETXNAD-DUXPYHPUSA-N
Vitis vinifera	GAMMA-TOCOPHEROL	QUEDXNHFTDJVIY-WENCSYSZSA-N
Vitis vinifera	DELPHINIDIN	JKHRCGUTYDNCLE-UHFFFAOYSA-O
Vitis vinifera	PERLARGONIDIN-3-O-BETA-D-GLUCOSIDE|PELARGONIDIN-3-O-GLUCOSIDE|CALLISTEPHIN|PELARGONIDIN-3-MONOGLUCOSIDE|PELARGONIDIN-3-GLUCOSIDE	ABVCUBUIXWJYSE-GQUPQBGVSA-O
Vitis vinifera	NONANAL|PELARGONALDEHYDE|NONAN-1-AL|NONYL-ALDEHYDE	GYHFUZHODSMOHU-UHFFFAOYSA-N
Vitis vinifera	SERINE	MTCFGRXMJLQNBG-REOHCLBHSA-N
Vitis vinifera	PETUNIDIN-3-(6-P-COUMAROYLGLUCOSIDE)	KTFQEFWNLAUGAX-WSAFTLCOSA-O
Vitis vinifera	TYROSINE	OUYCCCASQSFEME-UHFFFAOYSA-N
Vitis vinifera	MELIBIOSE	DLRVVLDZNNYCBX-ZZFZYMBESA-N
Vitis vinifera	CITRONELLOL|BETA-CITRONELLOL	QMVPMAAFGQKVCJ-SNVBAGLBSA-N
Vitis vinifera	HYDROXY-CITRONELLOL	KJEPWFRZPBOMID-UHFFFAOYSA-N
Vitis vinifera	CATECHIN|(-)-CATECHIN	PFTAWBLQPZVEMU-HIFRSBDPSA-N
Vitis vinifera	ISOLEUCINE	AGPKZVBTJJNPAG-UHNVWZDZSA-N
Vitis vinifera	PALMITIC-ACID|HEXADECANOIC-ACID	IPCSVZSSVZVIGE-UHFFFAOYSA-N
Vitis vinifera	COUMARIN|COUMARIC-ACID	ZYGHJZDHTFUPRJ-UHFFFAOYSA-N
Vitis vinifera	EPICATECHIN|EPICATECHOL|(-)-EPICATECHIN|CATECHIN|(-)-EPICATECHOL|DL-CATECHOL	PFTAWBLQPZVEMU-UHFFFAOYSA-N
Vitis vinifera	DIHYDROQUERCETIN-3-RHAMNOSIDE|ASTILBIN	ZROGCCBNZBKLEL-ZFKRROIOSA-N
Vitis vinifera	GLUTAMIC-ACID	WHUUTDBJXJRKMK-UHFFFAOYSA-N
Vitis vinifera	GRASSHOPPER-KETONE	QMXLZUOHZGYGDY-JBGXHEPSSA-N
Vitis vinifera	GALACTOSE|HEXOSE|D-GALACTOSE	WQZGKKKJIJFFOK-PHYPRBDBSA-N
Vitis vinifera	NEO-CHLOROGENIC-ACID|NEOCLOROGENIC-ACID|NEOCHLOROGENIC-ACID	CWVRJTMFETXNAD-NXLLHMKUSA-N
Vitis vinifera	OLEANOLIC-ACID	MIJYXULNPSFWEK-GTOFXWBISA-N
Vitis vinifera	AWOBANIN	HXWHJZIJSNBCJX-FDVUZUPYSA-O
Vitis vinifera	CHOLINE-SALICYLATE|SALICYLIC-ACID|O-HYDROXYBENZOIC-ACID	YGSDEFSMJLZEOE-UHFFFAOYSA-N
Vitis vinifera	CHLOROGENIC-ACID	CWVRJTMFETXNAD-VRWXVSRJSA-N
Vitis vinifera	D-ARABINOSE|ARABINOSE|XYLOSE|PENTOSE	PYMYPHUHKUWMLA-VAYJURFESA-N
Vitis vinifera	DELPHINIDIN-3-CAFFEYLGLUCOSIDE	CPESTIBYQUOXSA-PWOSISDISA-O
Vitis vinifera	SQUALENE	YYGNTYWPHWGJRM-AAJYLUCBSA-N
Vitis vinifera	STIGMASTEROL	HCXVJBMSMIARIN-BGDBIVFESA-N
Vitis vinifera	ALPHA-ALANINE|ALANINE|L-ALANINE	QNAYBMKLOCPYGJ-UHFFFAOYSA-N
Vitis vinifera	ASCORBIC-ACID	TYQCGQRIZGCHNB-MVHIGOERSA-N
Vitis vinifera	COPPER	RYGMFSIKBFXOCR-UHFFFAOYSA-N
Vitis vinifera	BETA-CRYPTOXANTHIN|CRYPTOXANTHIN	DMASLKHVQRHNES-FKKUPVFPSA-N
Vitis vinifera	VIOLEOXANTHIN|VIOLAXANTHIN|CIS-VIOLAXANTHIN	SZCBXWMUOPQSOX-NLNQYMAJSA-N
Vitis vinifera	ISOLEUCINE	AGPKZVBTJJNPAG-WHFBIAKZSA-N
Vitis vinifera	LEUCINE	ROHFNLRQFUQHCH-YFKPBYRVSA-N
Vitis vinifera	LACTIC-ACID	JVTAAEKCZFNVCJ-UWTATZPHSA-N
Vitis vinifera	HENTRIACONTANE	SVXXXVZKBJDOAY-UHFFFAOYSA-N
Vitis vinifera	EPICATECHIN-(4BETA->8)-EPICATECHIN-3-O-GALLATE	VLFKNLZNDSEVBZ-XOKZLUOPSA-N
Vitis vinifera	PROTOCATECHUALDEHYDE|PROTOCATECHUIC-ALDEHYDE	IBGBGRVKPALMCQ-UHFFFAOYSA-N
Vitis vinifera	LYSINE|L-(+)-LYSINE|L-LYSINE	KDXKERNSBIXSRK-YFKPBYRVSA-N
Vitis vinifera	P-COUMARIC-ACID|4-HYDROXYCINNAMIC-ACID|P-COUMARINIC-ACID|TRANS-P-COUMARIC-ACID|P-HYDROXYCINNAMIC-ACID	NGSWKAQJJWESNS-ZZXKWVIFSA-N
Vitis vinifera	SHIKIMIC-ACID	JXOHGGNKMLTUBP-INWUZDNDSA-N
Vitis vinifera	TOCOPHEROL|ALPHA-TOCOPHEROL|VITAMIN-E	GVJHHUAWPYXKBD-IEOSBIPESA-N
Vitis vinifera	MAGNESIUM-TARTRATE|TARTARIC-ACID	FEWJPZIEWOKRBE-UHFFFAOYSA-N
Vitis vinifera	MONOCAFFEOYLTARTARIC-ACID	SWGKAHCIOQPKFW-RQOWECAXSA-N
Vitis vinifera	HYACINTHIN	QAOBEOXFSUJDJL-QFLFCSHESA-O
Vitis vinifera	ZEAXANTHIN	JKQXZKUSFCKOGQ-QAYBQHTQSA-N
Vitis vinifera	ERGOSTEROL	MECHNRXZTMCUDQ-RKHKHRCZSA-N
Vitis vinifera	PROVITAMIN-D|CHOLESTEROL	HVYWMOMLDIMFJA-DPAQBDIFSA-N
Vitis vinifera	N-PROPYL-AMINE	WGYKZJWCGVVSQN-UHFFFAOYSA-N
Vitis vinifera	BENZOIC-ACID	WPYMKLBDIGXBTP-UHFFFAOYSA-N
Vitis vinifera	PHOSPHATIDYL-INOSITOL	FQZQXPXKJFOAGE-UHFFFAOYSA-N
Vitis vinifera	ARECATANNIN--B1	PBYRKMXDROOXMU-KCXYZFMFSA-N
Vitis vinifera	CYCLOARTENOL	ONQRKEUAIJMULO-XCNBMAHYSA-N
Vitis vinifera	MALVIDIN-3-GLUCOSIDE-4-VINYLPHENOL	QVDUZUIZMDYJSK-BGXVWEPQSA-O
Vitis vinifera	BETA-SITOSTEROL|GAMMA-SITOSTEROL	KZJWDPNRJALLNS-UHFFFAOYSA-N
Vitis vinifera	BETA-SITOSTEROL	KZJWDPNRJALLNS-GDQWMHGZSA-N
Vitis vinifera	ACETIC-ACID|DECAN-1-AL	QTBSBXVTEAMEQO-UHFFFAOYSA-N
Vitis vinifera	CIS-RESVERATROL-3,4'-O-BETA-DIGLUCOSIDE	YGQPMDDXSJHKJT-CASXMWBJSA-N
Vitis vinifera	CITROSTADIENOL|CITROSTADIENIOL	LPZCCMIISIBREI-VMZJTLAQSA-N
Vitis vinifera	CYANIDIN-3-O-GALACTOSIDE|CYANIDIN-3-GALACTOSIDE	RKWHWFONKJEUEF-NHXMLZDGSA-O
Vitis vinifera	TETRADECENOIC-ACID|MYRISTIC-ACID|TETRADECANOIC-ACID	TUNFSRHWOTWDNC-UHFFFAOYSA-N
Vitis vinifera	URSOLIC-ACID|URSOLIC-ACID-I|BETA-URSOLIC-ACID	WCGUUGGRBIKTOS-GPOJBZKASA-N
Vitis vinifera	LINALOOL|(-)-LINALOOL|(R)-LINALOOL|L-LINALOOL	CDOSHBSSFJOMGT-JTQLQIEISA-N
Vitis vinifera	HEPTACOSAN-1-OL	ULCZGKYHRYJXAU-UHFFFAOYSA-N
Vitis vinifera	CYANIN|BETA-CYANIN|CYANIDIN-3,5-DI-O-GLUCOSIDE	RDFLLVCQYHQOBU-ZOTFFYTFSA-O
Vitis vinifera	PHOSPHORUS	XYFCBTPGUUZFHI-UHFFFAOYSA-N
Vitis vinifera	PAEONIDIN-3-O-GLUCOSIDE|PEONIDIN-3-O-GLUCOSIDE	ZZWPMFROUHHAKY-OUUKCGNVSA-O
Vitis vinifera	PETUNIDIN-3-(6''-ACETYLGLUCOSIDE)	GPUBWXUQPURXOQ-DXRYYMCWSA-O
Vitis vinifera	POTASSIUM|POTASSIUM-OXIDE|POTASSIUM-CHLORIDE|K2O	NTTOTNSKUYCDAV-UHFFFAOYSA-N
Vitis vinifera	4-HYDROXYBENZOIC-ACID|P-HYDROXY-BENZOIC-ACID|P-HYDROXYBENZOIC-ACID|4-HYDROXY-BENZOIC-ACID	FJKROLUGYXJWQN-UHFFFAOYSA-N
Vitis vinifera	SINAPIC-ACID|TRANS-SINAPIC-ACID|SINAPIC-ACID-ESTER	PCMORTLOPMLEFB-ONEGZZNKSA-N
Vitis vinifera	TARAXEROL	GGGUGZHBAOMSFJ-GADYQYKKSA-N
Vitis vinifera	N-HENTRIACONTANE|HENTRIACONTANE	IUJAMGNYPWYUPM-UHFFFAOYSA-N
Vitis vinifera	CHLOROGENIC-ACID|CAFFEOYLQUINIC-ACID|ISOCHLOROGENIC-ACID|3-O-CAFFEOYLQUINIC-ACID|TRANS-CHLOROGENIC-ACID|3-CAFFEOYLQUINIC-ACID	CWVRJTMFETXNAD-JUHZACGLSA-N
Vitis vinifera	GENTISINIC-ACID|2,5-DIHYDROXYBENZOIC-ACID|GENTISIC-ACID	WXTMDXOMEHJXQO-UHFFFAOYSA-N
Vitis vinifera	DELPHIN	XCTGXGVGJYACEI-BYNFETKLSA-O
Vitis vinifera	TRANS-CAFTARIC-ACID|CAFTARIC-ACID	SWGKAHCIOQPKFW-DUXPYHPUSA-N
Vitis vinifera	MALVIDIN	KZMACGJDUUWFCH-UHFFFAOYSA-O
Vitis vinifera	CITRONELLOL	JGQFVRIQXUFPAH-UHFFFAOYSA-N
Vitis vinifera	TYROSINE	WRFPVMFCRNYQNR-UHFFFAOYSA-N
Vitis vinifera	TYROSINE	OUYCCCASQSFEME-MRVPVSSYSA-N
Vitis vinifera	(-)-EPICATECHIN-GALLATE|(-)-EPICATECHIN-3-O-GALLATE|EPICATECHIN-3-O-GALLATE|EPICATECHIN-3-GALLATE|EPICATECHIN-GALLATE|(-)-EPICATECHIN-3-GALLATE	LSHVYAFMTMFKBA-FPOVZHCZSA-N
Vitis vinifera	9-RIBOSYL-TRANS-ZEATIN|ZEATIN-RIBOSIDE	GOSWTRUMMSCNCW-HNNGNKQASA-N
Vitis vinifera	GLYCINE-BETAINE|BETAINE	KWIUHFFTVRNATP-UHFFFAOYSA-O
Vitis vinifera	RESVERATROL-(E)-DEHYDRODIMER	LILPTCHQLRKZNG-UVQWMVBFSA-N
Vitis vinifera	LYSINE|L-(+)-LYSINE	KDXKERNSBIXSRK-UHFFFAOYSA-N
Vitis vinifera	ERUCIC-ACID	DPUOLQHDNGRHBS-MDZDMXLPSA-N
Vitis vinifera	PROCYANIDIN-C-1	MOJZMWJRUKIQGL-XILRTYJMSA-N
Vitis vinifera	TRIACONTANOL|N-1-TRIACONTANOL|MYRICYL-ALCOHOL|TRIACONTAN-1-OL|1-TRIACONTANOL|N-TRIACONTANOL|MELISSYL-ALCOHOL	REZQBEBOWJAQKS-UHFFFAOYSA-N
Vitis vinifera	GLYCERIC-ACID|D-GLYCERIC-ACID	RBNPOMFGQQGHHO-UWTATZPHSA-N
Vitis vinifera	GALLOCATECHIN-3-O-GALLATE	WMBWREPUVVBILR-GHTZIAJQSA-N
Vitis vinifera	GAMMA-TOCOTRIENOL	OTXNTMVVOOBZCV-WAZJVIJMSA-N
Vitis vinifera	LITHIUM	SIAPCJWMELPYOE-UHFFFAOYSA-N
Vitis vinifera	VANILLIN|O-VANILLIN	JJVNINGBHGBWJH-UHFFFAOYSA-N
Vitis vinifera	TARAXEROL	GGGUGZHBAOMSFJ-UHFFFAOYSA-N
Vitis vinifera	ALPHA-CAROTENE|CAROTENE	ANVAOWXLWRTKGA-JLTXGRSLSA-N
Vitis vinifera	ENGELETIN	VQUPQWGKORWZII-WDPYGAQVSA-N
Vitis vinifera	LINALOOL|(-)-LINALOOL|(+)-LINALOOL|S-(+)-LINALOOL	CDOSHBSSFJOMGT-SNVBAGLBSA-N
Vitis vinifera	LUPENOL|LUPEOL	MQYXUWHLBZFQQO-QGTGJCAVSA-N
Vitis vinifera	LYCOPENE	OAIJSZIZWZSQBC-BYUNHUQQSA-N
Vitis vinifera	TRYPTOPHAN|L-(-)-TRYPTOPHAN	QIVBCDIJIAJPQS-UHFFFAOYSA-N
Vitis vinifera	PHENYLALANINE	COLNVLDHVKWLRT-UHFFFAOYSA-N
Vitis vinifera	PROCYANIDIN-B5	GMISZFQPFDAPGI-HZZPXJBDSA-N
Vitis vinifera	I-TERPINEOL|TERPINEOL|ALPHA-TERPINEOL	WUOACPNHFRMFPN-SECBINFHSA-N
Vitis vinifera	L-METHIONINE|METHIONINE	FFEARJCKVFRZRR-BYPYZUCNSA-N
Vitis vinifera	XYLOSE	PYMYPHUHKUWMLA-WISUUJSJSA-N
Vitis vinifera	QUERCETRIN|QUERCETIN-3-RHAMNOSIDE|QUERCETIN-3-O-RHAMNOSIDE|QUERCITRIN	OXGUCUVFOIWWQJ-HQBVPOQASA-N
Vitis vinifera	ETHYL-LINOLEATE|LINOLEIC-ACID-ETHYL-ESTER	FMMOOAYVCKXGMF-MURFETPASA-N
Vitis vinifera	GALACTOSE|D-MANNOSE|MANNOSE|GLUCOSE	WQZGKKKJIJFFOK-QTVWNMPRSA-N
Vitis vinifera	HENTRIACONTANE	SCPLWVLCBWLBBZ-UHFFFAOYSA-N
Vitis vinifera	LEUCOCYANIDIN	SBZWTSHAFILOTE-KKUMJFAQSA-N
Vitis vinifera	TIBOUCHININ	KGEHZUCHEKVXEU-GRFZEYSCSA-O
Vitis vinifera	PALMITIC-ACID-BUTYL-ESTER	GLYJVQDYLFAUFC-UHFFFAOYSA-N
Vitis vinifera	LUTEOXANTHIN	YNNRPBRNWWIQPQ-MAAFUUECSA-N
Vitis vinifera	RAFFINOSE	MUPFEKGTMRGPLJ-UHFFFAOYSA-N
Vitis vinifera	GERANIOL|NEROL	GLZPCOQZEFWAFX-YFHOEESVSA-N
Vitis vinifera	EPSILON-VINIFERIN|(-)-EPSILON-VINIFERIN	FQWLMRXWKZGLFI-YVYUXZJTSA-N
Vitis vinifera	D-GLUCOSE|DEXTROSE|ALPHA-GLUCOSE|GLUCOSE	WQZGKKKJIJFFOK-DVKNGEFBSA-N
Vitis vinifera	LUTEOLIN|LUTEOLOL	IQPNAANSBPBGFQ-UHFFFAOYSA-N
Vitis vinifera	DELPHINIDIN-3,5-DI-O-BETA-D-GLUCOSIDE|DELPHINIDIN-3,5-DIGLUCOSIDE	XCTGXGVGJYACEI-LCENJUANSA-O
Vitis vinifera	CITRONELLOL|BETA-CITRONELLOL	QMVPMAAFGQKVCJ-UHFFFAOYSA-N
Vitis vinifera	OLEANOLIC-ALDEHYDE	STHRNDDZYFUIDO-KWVOMAKGSA-N
Vitis vinifera	LEUCOCYANIDIN	SBZWTSHAFILOTE-RBSFLKMASA-N
Vitis vinifera	PAEONIDIN-3-(6-P-COUMAROYLGLUCOSIDE)	MFHMTMFSFNMTFQ-KHEPWEFFSA-O
Vitis vinifera	ALANINE	QNAYBMKLOCPYGJ-UWTATZPHSA-N
Vitis vinifera	ZEAXANTHIN|VIOLEOXANTHIN|TRANS-VIOLAXANTHIN|VIOLAXANTHIN	SZCBXWMUOPQSOX-WVJDLNGLSA-N
Vitis vinifera	HYPERIN|QUERCETIN-3-O-GALACTOSIDE|HYPEROSIDE	OVSQVDMCBVZWGM-WVTKYERHSA-N
Vitis vinifera	STRONTIUM	KJNGJIPPQOFCSK-UHFFFAOYSA-N
Vitis vinifera	MALVIDIN-3-GLUCOSIDE-4-VINYLCATECHOL	RFTHDRVOYDHSOC-BGXVWEPQSA-O
Vitis vinifera	QUINIC-ACID	AAWZDTNXLSGCEK-WRLPILLBSA-N
Vitis vinifera	BETA-CAROTENE|ZETA-CAROTENE	BIWLELKAFXRPDE-WTXAYMOSSA-N
Vitis vinifera	EUTYPINE	HFSFSKBQIGXUEY-UHFFFAOYSA-N
Vitis vinifera	TRANS-GERANIOL|GERANIOL|NEROL	GLZPCOQZEFWAFX-JXMROGBWSA-N
Vitis vinifera	PROCYANIDIN-B3	XFZJEEAOWLFHDH-HNTGQZGLSA-N
Vitis vinifera	24-METHYL-CYCLOARTENOL|CYCLOLAUDENOL	IXHACUTUTOCSJE-HWTFXIFRSA-N
Vitis vinifera	TRANS-RESVERATROL|RESVERATROL	LUKBXSAWLPMMSZ-OWOJBTEDSA-N
Vitis vinifera	SILVER	BQCADISMDOOEFD-UHFFFAOYSA-N
Vitis vinifera	MELATONIN	DRLFMBDRBRZALE-UHFFFAOYSA-N
Vitis vinifera	ASPARTIC-ACID	CKLJMWTZIZZHCS-UHFFFAOYSA-N
Vitis vinifera	ALPHA-VINIFERIN	KUTVNHOAKHJJFL-UHFFFAOYSA-N
Vitis vinifera	PECTIC-ACID|PECTIN|CALCIUM-PECTATE|POLYGALACTURONIC-ACID	AEMOLEFTQBMNLQ-BKBMJHBISA-N
Vitis vinifera	SYRINGALDEHYDE	KCDXJAYRVLXPFO-UHFFFAOYSA-N
Vitis vinifera	GAMMA-CAROTENE	HRQKOYFGHJYEFS-BXOLYSJBSA-N
Vitis vinifera	STEARIC-ACID-BUTYL-ESTER	ULBTUVJTXULMLP-UHFFFAOYSA-N
Vitis vinifera	PTEROSTILBENE	VLEUZFDZJKSGMX-ONEGZZNKSA-N
Vitis vinifera	EPIGALLOCATECHOL|L-EPIGALLOCATECHIN|GALLOCATECHOL|(-)-EPIGALLOCATECHIN|(-)-EPI-GALLO-CATECHOL|EPIGALLOCATECHIN	XMOCLSLCDHWDHP-IUODEOHRSA-N
Vitis vinifera	L-MALIC-ACID|MALIC-ACID	BJEPYKJPYRNKOW-REOHCLBHSA-N
Vitis vinifera	ZIRCONIUM	QCWXUUIWCKQGHC-UHFFFAOYSA-N
Vitis vinifera	LACTIC-ACID|MAGNESIUM-LACTATE	JVTAAEKCZFNVCJ-UHFFFAOYSA-N
Vitis vinifera	BROMINE	GDTBXPJZTBHREO-UHFFFAOYSA-N
Vitis vinifera	ARECATAMNIN-A1	MOJZMWJRUKIQGL-LSLARCDZSA-N
Vitis vinifera	DELPHINIDIN-3-O-BETA-D-GLUCOSIDE	XIIACXXCJBZLHS-KKUOEXSZSA-N
Vitis vinifera	COBALT	GUTLYIVDDKVIGB-UHFFFAOYSA-N
Vitis vinifera	D-FRUCTOSE|FRUCTOSE	BJHIKXHVCXFQLS-UYFOZJQFSA-N
Vitis vinifera	ZEATIN-RIBOSIDE	GOSWTRUMMSCNCW-SVOARWBNSA-N
Vitis vinifera	TRANS-CAFTARIC-ACID|CIS-CAFTARIC-ACID	SWGKAHCIOQPKFW-JTNORFRNSA-N
Vitis vinifera	CATALASE	NUVBSKCKDOMJSU-UHFFFAOYSA-N
Vitis vinifera	SUCCINIC-ACID	KDYFGRWQOYBRFD-UHFFFAOYSA-N
Vitis vinifera	CONIFERALDEHYDE|CONIFERYL-ALDEHYDE	DKZBBWMURDFHNE-NSCUHMNNSA-N
Vitis vinifera	RAFFINOSE	MUPFEKGTMRGPLJ-ZQSKZDJDSA-N
Vitis vinifera	ERUCIC-ACID	DPUOLQHDNGRHBS-KTKRTIGZSA-N
Vitis vinifera	CYSTINE	YTPQSLLEROSACP-UHFFFAOYSA-N
Vitis vinifera	NEOXANTHIN-A|NEOXANTHIN	PGYAYSRVSAJXTE-CLONMANBSA-N
Vitis vinifera	EPICATECHIN-(4BETA->8)-EPICATECHIN-(4BETA->6)-EPICATECHIN	PBYRKMXDROOXMU-IVAYYDTOSA-N
Vitis vinifera	DELPHINIDIN-3-(6''-ACETYLGLUCOSIDE)	QPXIWIXIRHZIMM-OXUVVOBNSA-O
Vitis vinifera	OXYCOCCICYANIN	ZZWPMFROUHHAKY-CDVBAKLBSA-O
Vitis vinifera	FORMIC-ACID	BDAGIHXWWSANSR-UHFFFAOYSA-N
Vitis vinifera	QUERCETRIN|QUERCETIN-3-O-RHAMNOSIDE|QUERCITRIN	OXGUCUVFOIWWQJ-KNPIPFGMSA-N
Vitis vinifera	EPI-GALLOCATECHIN-3-O-GALLATE|(-)-EPIGALLOCATECHIN-GALLATE|EPIGALLOCATECHIN-GALLATE|EPIGALLOCATECHIN-3-GALLATE|EPIGALLOCATECHOL-GALLATE|(-)-EPIGALLOCATECHIN-3-GALLATE|EPIGALLOCATECHIN-3-O-GALLATE|(-)-EPIGALLOCATECHIN-3-O-GALLATE|(-)-EPIGALLOCATECHOL-GALLATE	WMBWREPUVVBILR-WIYYLYMNSA-N
Vitis vinifera	CITRONELLOL	JGQFVRIQXUFPAH-JTQLQIEISA-N
Vitis vinifera	BENZYL-ALCOHOL	WVDDGKGOMKODPV-UHFFFAOYSA-N
Vitis vinifera	PSEUDOTARAXASTEROL|TARAXASTEROL	NGFFRJBGMSPDMS-MHFMPXFTSA-N
Vitis vinifera	N-OCTYL-ALCOHOL|OCTAN-1-OL-ACETATE|OCTAN-1-OL|OCTANOL|N-OCTANOL|1-OCTANOL	KBPLFHHGFOOTCA-UHFFFAOYSA-N
Vitis vinifera	OBTUSIFOLIOL	MMNYKQIDRZNIKT-VSADUBDNSA-N
Vitis vinifera	STIGMASTEROL	HCXVJBMSMIARIN-KEJCWXRGSA-N
Vitis vinifera	VITISPIRANE	DUPDJVDPPBFBPL-UHFFFAOYSA-N
Vitis vinifera	DAMASCENONE|BETA-DAMASCENONE	POIARNZEYGURDG-FNORWQNLSA-N
Vitis vinifera	AMYRIN|BETA-AMYRIN	JFSHUTJDVKUMTJ-QHPUVITPSA-N
Vitis vinifera	GERMANICOL	QMUXVPRGNJLGRT-PNTWTTAKSA-N
Vitis vinifera	ELLAGIC-ACID	AFSDNFLWKVMVRB-UHFFFAOYSA-N
Vitis vinifera	CYSTINE	LEVWYRKDKASIDU-IMJSIDKUSA-N
Vitis vinifera	2-PHENYLETHANOL|BETA-PHENETHYL-ALCOHOL|BETA-PHENYLETHANOL|PHENETHYL-ALCOHOL|BETA-PHENYLETHYLALCOHOL|2-PHENYLETHAN-1-OL|2-PHENYLETHYL-ALCOHOL|PHENYL-ETHYL-ALCOHOL|PHENYLETHANOL	WRMNZCZEMHIOCP-UHFFFAOYSA-N
Vitis vinifera	2-TRANS-DECENAL	MMFCJPPRCYDLLZ-CMDGGOBGSA-N
Vitis vinifera	SELENIUM	SPVXKVOXSXTJOY-UHFFFAOYSA-N
Vitis vinifera	ARABINOSE|XYLOSE	PYMYPHUHKUWMLA-UHFFFAOYSA-N
Vitis vinifera	MOLYBDENUM	ZOKXTWBITQBERF-UHFFFAOYSA-N
Vitis vinifera	PEONIDIN-3-(6''-P-COUMARYLGLUCOSIDE)-5-GLUCOSIDE	YOBDYPINTRIHCR-ATYBKVPPSA-O
Vitis vinifera	[EPICATECHIN-(4BETA-8)]2-EPICATECHIN-3-O-GALLATE	FYNOPTDFZIWSDG-VRPNSHJQSA-N
Vitis vinifera	DELPHINIDIN-3,5-DIGLUCOSIDE	ZQMDJECDLYTUCE-MZZRTBEMSA-N
Vitis vinifera	CATECHOL|PYROCATECHOL	YCIMNLLNPGFGHC-UHFFFAOYSA-N
Vitis vinifera	QUINIC-ACID|(-)-QUINIC-ACID	AAWZDTNXLSGCEK-UHFFFAOYSA-N
Vitis vinifera	TOCOPHEROL|ALPHA-TOCOPHEROL|VITAMIN-E	GVJHHUAWPYXKBD-IHMCZWCLSA-N
Vitis vinifera	ALPHA-LINOLENIC-ACID|LINOLENIC-ACID	DTOSIQBPPRVQHS-PDBXOOCHSA-N
Vitis vinifera	PROLINE|PYRROLIDINE-CARBOXYLIC-ACID	ONIBWKKTOPOVIA-UHFFFAOYSA-N
Vitis vinifera	KAEMPFEROL|TRIFOLITIN	IYRMWMYZSQPJKC-UHFFFAOYSA-N
Vitis vinifera	ENGELETIN	VQUPQWGKORWZII-QDMCPWRYSA-N
Vitis vinifera	GLYCINE|GLYCOCOLL	DHMQDGOQFOQNFH-UHFFFAOYSA-N
Vitis vinifera	VANILLIN|P-VANILLIN|VANNILALDEHYDE	MWOOGOJBHIARFG-UHFFFAOYSA-N
Vitis vinifera	INDOLE-ACETIC-ACID|INDOLE-3-ACETIC-ACID|BETA-INDOLEACETIC-ACID	SEOVTRFCIGRIMH-UHFFFAOYSA-N
Vitis vinifera	MYO-INOSITOL|L-INOSITOL|MESO-INOSITOL|CHIRO-INOSITOL|SCYLLITOL|INOSITOL	CDAISMWEOUEBRE-UHFFFAOYSA-N
Vitis vinifera	CYANIN	RDFLLVCQYHQOBU-GPGGJFNDSA-O
Vitis vinifera	FUMARIC-ACID|MALEIC-ACID	VZCYOOQTPOCHFL-OWOJBTEDSA-N
Vitis vinifera	DELPHINIDIN-3-(6''-P-COUMARYLGLUCOSIDE)	DHTPVCYNNWQRMN-LHRGPQAGSA-O
Vitis vinifera	HISTIDINE	HNDVDQJCIGZPNO-UHFFFAOYSA-N
Vitis vinifera	PEONIDIN-3-(6''-CAFFEYLGUCOSIDE)	HAJIFDLIYRCSKS-GVFKUQRYSA-O
Vitis vinifera	MALVIDIN-3-(6''-P-CAFFEYGLUCOSIDE)	LIEHUFTYLLDHTI-KWNZYCHBSA-O
Vitis vinifera	3-O-GALLOYLEPICATECHIN-(4BETA->6)-CATECHIN	TVPXEVSMCUYBHB-HZXRTWINSA-N
Vitis vinifera	STEARIC-ACID	QIQXTHQIDYTFRH-UHFFFAOYSA-N
Vitis vinifera	CIS-CAFFEIC-ACID	QAIPRVGONGVQAS-RQOWECAXSA-N
Vitis vinifera	CYANIDIN-3-O-BETA-D-GLUCOSIDE|CHRYSANTHEMIN|CYANIDIN-3-GLUCOSIDE|CYANIDIN-3-MONOGLUCOSIDE|CYANIDIN-3-O-GLUCOSIDE	RKWHWFONKJEUEF-GQUPQBGVSA-O
Vitis vinifera	RUBIDIUM	UCYFRLNGKNNHBD-UHFFFAOYSA-N
Vitis vinifera	METHYL-AMINE	BAVYZALUXZFZLV-UHFFFAOYSA-N
Vitis vinifera	PHYTOFLUENE	OVSVTCFNLSGAMM-OUOOUFEBSA-N
Vitis vinifera	QUERCETIN-3,3'-O-BETA-D-GLUCOSIDE|QUERCIMERETRIN|QUERCIMERITRIN	BBFYUPYFXSSMNV-HMGRVEAOSA-N
Vitis vinifera	OLEANOLIC-ACID	MIJYXULNPSFWEK-LXLHWSNGSA-N
Vitis vinifera	LEUCOCYANIDIN	SBZWTSHAFILOTE-QLFBSQMISA-N
Vitis vinifera	DELTA-TOCOPHEROL|TOCOPHEROL	GZIFEOYASATJEH-VHFRWLAGSA-N
Vitis vinifera	LINALOL|LINALOOL|(-)-LINALOOL	CDOSHBSSFJOMGT-UHFFFAOYSA-N
Vitis vinifera	URSOLIC-ACID|URSOLIC-ACID-I	WCGUUGGRBIKTOS-UHFFFAOYSA-N
Vitis vinifera	LEUCOCYANIDIN	SBZWTSHAFILOTE-UHFFFAOYSA-N
Vitis vinifera	ALPHA-TOCOPHEROL|VITAMIN-E|VIT-E	GVJHHUAWPYXKBD-QLVXXPONSA-N
Vitis vinifera	PEONIDIN-3,5-DIGLUCOSIDE|PAEONIDIN-3-5,-DIGLUCOSIDE	IPVSUYLZIAYTOK-DPOJTEBASA-O
Vitis vinifera	CALCIUM-OXALATE|MAGNESIUM-OXALATE|OXALIC-ACID	MUBZPKHOEPUJKR-UHFFFAOYSA-N
Vitis vinifera	QUINIC-ACID|(-)-QUINIC-ACID	AAWZDTNXLSGCEK-ZHQZDSKASA-N
Vitis vinifera	PICEID	HSTZMXCBWJGKHG-JTHNCSCQSA-N
Vitis vinifera	PEONIDIN-ACETYL-3,5-DIGLUCOSIDE	KOJLDSZARRTMAS-PKLHCEDMSA-O
Vitis vinifera	PHENYLALANINE	COLNVLDHVKWLRT-QMMMGPOBSA-N
Vitis vinifera	VITAMIN-K-1|PHYLLOQUINONE	MBWXNTAXLNYFJB-NKFFZRIASA-N
Vitis vinifera	PHYTOFLUENE	OVSVTCFNLSGAMM-DGFSHVNOSA-N
Vitis vinifera	ALPHA-LINOLENIC-ACID|DELTA-9,12,15-OCTADECATRIENIC-ACID	DTOSIQBPPRVQHS-IUQGRGSQSA-N
Vitis vinifera	GLYCERIC-ACID	RBNPOMFGQQGHHO-UHFFFAOYSA-N
Vitis vinifera	OBTUSIFOLIOL	MMNYKQIDRZNIKT-JRXZUNMASA-N
Vitis vinifera	MYRICETIN	IKMDFBPHZNJCSN-UHFFFAOYSA-N
Vitis vinifera	TOCOPHEROL|ALPHA-TOCOPHEROL|VITAMIN-E	GVJHHUAWPYXKBD-UHFFFAOYSA-N
Vitis vinifera	PROCYANIDIN-B4	XFZJEEAOWLFHDH-RBYKNZBFSA-N
Vitis vinifera	QUERCETIN-3-O-GLUCOSIDE|ISOQUERCITRIN|TRIFOLIIN	OVSQVDMCBVZWGM-ZVIPYZFUSA-N
Vitis vinifera	THREONINE	AYFVYJQAPQTCCC-GBXIJSLDSA-N
Vitis vinifera	DIHYDROKAEMPFEROL-3-O-ALPHA-L-RHAMNOPYRANOSIDE	VQUPQWGKORWZII-KTLFEHCLSA-N
Vitis vinifera	OLEANOLIC-ALDEHYDE	STHRNDDZYFUIDO-OSQDELBUSA-N
Vitis vinifera	(+)-ALPHA-VINIFERIN	KUTVNHOAKHJJFL-MRKFQJFNSA-N
Vitis vinifera	ALPHA-CRYPTOXANTHIN|CRYPTOXANTHIN	ORAKUVXRZWMARG-UDSJNADVSA-N
Vitis vinifera	ERGOSTEROL	DNVPQKQSNYMLRS-BQYQJAHWSA-N
Vitis vinifera	ALANINE|BETA-ALANINE	UCMIRNVEIXFBKS-UHFFFAOYSA-N
Vitis vinifera	3-O-GALLOYLEPICATECHIN-(4BETA->8)-EPICATECHIN-3-O-GALLATE|PROANTHOCYANIDIN-B2-3,3'-O-GALLATE|PROCYANIDIN-B-2-3,3'-DI-O-GALLATE	KTLUHRSHFRODPS-RIQPQZJCSA-N
Vitis vinifera	PELARGONIDIN	XVFMGWDSJLBXDZ-UHFFFAOYSA-O
Vitis vinifera	VITAMIN-B-6|VIT-B-6|PYRIDOXINE	LXNHXLLTXMVWPM-UHFFFAOYSA-N
Vitis vinifera	VANILLIC-ACID|4-HYDROXY-3-METHOXY-BENZOIC-ACID	WKOLLVMJNQIZCI-UHFFFAOYSA-N
Vitis vinifera	ROSEOSIDE	SWYRVCGNMNAFEK-PPSGZOJSSA-N
Vitis vinifera	ALPHA-VINIFERIN	KUTVNHOAKHJJFL-ZSIJVUTGSA-N
Vitis vinifera	METHYL-INDOLE-3-ACETATE|INDOLE-3-ACETIC-ACID-METHYL-ESTER	KTHADMDGDNYQRX-UHFFFAOYSA-N
Vitis vinifera	PROLINE	ONIBWKKTOPOVIA-SCSAIBSYSA-N
Vitis vinifera	LUTEIN|XANTHOPHYLL|LUTEIN-ESTER	KBPHJBAIARWVSC-RTIVXWJOSA-N
Vitis vinifera	CYCLOARTENOL	ONQRKEUAIJMULO-YBXTVTTCSA-N
Vitis vinifera	QUINIC-ACID|(-)-QUINIC-ACID	AAWZDTNXLSGCEK-VNDMDPINSA-N
Vitis vinifera	BETA-AMYRIN	JFSHUTJDVKUMTJ-UHFFFAOYSA-N
Vitis vinifera	PELARGONIDIN-3-P-COUMARYLGLUCOSIDE	VZPBBOAZFCREMQ-SHPGVJHPSA-O
Vitis vinifera	CAMPESTEROL	SGNBVLSWZMBQTH-UHFFFAOYSA-N
Vitis vinifera	GLUTAMIC-ACID|L-GLUTAMIC-ACID	WHUUTDBJXJRKMK-VKHMYHEASA-N
Prunella vulgaris	HYPERIN|QUERCETIN-3-O-GALACTOSIDE|HYPEROSIDE	OVSQVDMCBVZWGM-CAWYGJOUSA-N
Prunella vulgaris	ZINC	HCHKCACWOHOZIP-UHFFFAOYSA-N
Prunella vulgaris	PHYTOL	BOTWFXYSPFMFNR-PYDDKJGSSA-N
Prunella vulgaris	(-)-ALPHA-PHELLANDRENE|ALPHA-PHELLANDRENE|PHELLANDRENE|MENTHA-1,3-DIENE|L-PHELLANDRENE	OGLDWXZKYODSOB-UHFFFAOYSA-N
Prunella vulgaris	BETA-AMYRIN	JFSHUTJDVKUMTJ-KOMNAURRSA-N
Prunella vulgaris	PHYTOL	BOTWFXYSPFMFNR-QYLFUYDXSA-N
Prunella vulgaris	LUPEOL	MQYXUWHLBZFQQO-UHFFFAOYSA-N
Prunella vulgaris	D-FENCHONE|ALPHA-FENCHONE|FENCHONE	LHXDLQBQYFFVNW-UHFFFAOYSA-N
Prunella vulgaris	BETA-AMYRIN	JFSHUTJDVKUMTJ-XCIKXOPNSA-N
Prunella vulgaris	ACETYLURSOLIC-ACID	PHFUCJXOLZAQNH-OTMOLZNZSA-N
Prunella vulgaris	STIGMASTEROL	HCXVJBMSMIARIN-HJWRWDBZSA-N
Prunella vulgaris	IRON-OXIDE|IRON	XEEYBQQBJWHFJM-UHFFFAOYSA-N
Prunella vulgaris	MERCURY	QSHDDOUJBYECFT-UHFFFAOYSA-N
Prunella vulgaris	URSONIC-ACID	MUCRYNWJQNHDJH-KRRQJESASA-N
Prunella vulgaris	ALPHA-LINOLEIC-ACID|LINOLEIC-ACID	OYHQOLUKZRVURQ-HZJYTTRNSA-N
Prunella vulgaris	DELPHINIDIN	JKHRCGUTYDNCLE-UHFFFAOYSA-O
Prunella vulgaris	PHYTOL	BOTWFXYSPFMFNR-HKWRFOASSA-N
Prunella vulgaris	SCOPOLETIN|ISOSCOPOLETIN	SYTYLPHCLSSCOJ-UHFFFAOYSA-N
Prunella vulgaris	ROSMARINOL|LABIATENIC-ACID|ROSMARINIC-ACID|ROSMARIC-ACID	DOUMFZQKYFQNTF-WUTVXBCWSA-N
Prunella vulgaris	STIGMASTEROL	HCXVJBMSMIARIN-PHZDYDNGSA-N
Prunella vulgaris	URSOLIC-ACID|URSOLIC-ACID-I	WCGUUGGRBIKTOS-APYMDAETSA-N
Prunella vulgaris	DODECANOIC-ACID|NEODECANOIC-ACID|LAURIC-ACID	POULHZVOKOAJMA-UHFFFAOYSA-N
Prunella vulgaris	AMYRIN|BETA-AMYRIN	JFSHUTJDVKUMTJ-QHPUVITPSA-N
Prunella vulgaris	D-FRUCTOSE|FRUCTOSE	BJHIKXHVCXFQLS-UYFOZJQFSA-N
Prunella vulgaris	(-)-BETA-PINENE|BETA-PINENE|(+)-BETA-PINENE	WTARULDDTDQWMU-RKDXNWHRSA-N
Prunella vulgaris	KAEMPFEROL|TRIFOLITIN	IYRMWMYZSQPJKC-UHFFFAOYSA-N
Prunella vulgaris	TETRACOSANATE|LIGNOCERIC-ACID|TETRACOSANOIC-ACID	QZZGJDVWLFXDLK-UHFFFAOYSA-N
Prunella vulgaris	HIRSUTIN	TVLYGBFZDPPZFR-GDEYTQOFSA-O
Prunella vulgaris	NIGA-ICHIGOSIDE-F1	WKKBYJLXSKPKSC-NPPVAKLRSA-N
Prunella vulgaris	ARSENIC	RBFQJDQYXXHULB-UHFFFAOYSA-N
Prunella vulgaris	BETULINIC-ACID	QGJZLNKBHJESQX-UHFFFAOYSA-N
Prunella vulgaris	BETULIC-ACID|BETULINIC-ACID	QGJZLNKBHJESQX-FZFNOLFKSA-N
Prunella vulgaris	CAFFEIC-ACID|TRANS-CAFFEIC-ACID|DIHYDROXYCINNAMIC-ACID|3,4-DIHYDROXYCINNAMIC-ACID	QAIPRVGONGVQAS-DUXPYHPUSA-N
Prunella vulgaris	CHRYSATROPIC-ACID|SCOPOLETIN	RODXRVNMMDRFIK-UHFFFAOYSA-N
Prunella vulgaris	OLEANOLIC-ACID	MIJYXULNPSFWEK-GTOFXWBISA-N
Prunella vulgaris	SUCROSE	CZMRCDWAGMRECN-FXFGBNHJSA-N
Prunella vulgaris	PHYTOSTEROL|SITOSTEROL|GAMMA-SITOSTEROL|NIMBOSTEROL|BETA-SITOSTEROL|CLIONASTEROL	KZJWDPNRJALLNS-FBZNIEFRSA-N
Prunella vulgaris	SUCROSE	CZMRCDWAGMRECN-GDQSFJPYSA-N
Prunella vulgaris	STIGMASTEROL	HCXVJBMSMIARIN-KEJCWXRGSA-N
Prunella vulgaris	AWOBANIN	HXWHJZIJSNBCJX-FDVUZUPYSA-O
Prunella vulgaris	HYPERIN|QUERCETIN-3-O-GALACTOSIDE|HYPEROSIDE	OVSQVDMCBVZWGM-DTGCRPNFSA-N
Prunella vulgaris	FRUCTOSE	RHKKZBWRNHGJEZ-ARQDHWQXSA-N
Prunella vulgaris	BETA-GLUCOSE|D-GLUCOSE|DEXTROSE|GLUCOSE	WQZGKKKJIJFFOK-VFUOTHLCSA-N
Prunella vulgaris	MAGNESIUM	RSHAOIXHUHAZPM-UHFFFAOYSA-N
Prunella vulgaris	STIGMASTEROL	HCXVJBMSMIARIN-BGDBIVFESA-N
Prunella vulgaris	ASCORBIC-ACID	TYQCGQRIZGCHNB-MVHIGOERSA-N
Prunella vulgaris	COPPER	RYGMFSIKBFXOCR-UHFFFAOYSA-N
Prunella vulgaris	LINOLEIC-ACID	OYHQOLUKZRVURQ-IXWMQOLASA-N
Prunella vulgaris	HYPERIN|QUERCETIN-3-O-GALACTOSIDE|HYPEROSIDE	OVSQVDMCBVZWGM-WVTKYERHSA-N
Prunella vulgaris	ALPHA-PHELLANDRENE|PHELLANDRENE|L-PHELLANDRENE	OGLDWXZKYODSOB-SNVBAGLBSA-N
Prunella vulgaris	BETA-MYRCENE|MYRCENE	UAHWPYUMFXYFJY-UHFFFAOYSA-N
Prunella vulgaris	OLEANOLIC-ACID	AOWMBRPPHGNFDX-HPPBOAITSA-N
Prunella vulgaris	(-)-BETA-PINENE|BETA-PINENE|(-)-PINENE|PINENE	WTARULDDTDQWMU-UHFFFAOYSA-N
Prunella vulgaris	BETA-SITOSTEROL|GAMMA-SITOSTEROL	KZJWDPNRJALLNS-UHFFFAOYSA-N
Prunella vulgaris	BETA-SITOSTEROL	KZJWDPNRJALLNS-GDQWMHGZSA-N
Prunella vulgaris	CYNAROSIDE|LUTEOLIN-7-GLUCOSIDE|LUTEOLIN-7-O-MONOGLUCOSIDE|CYANAROSIDE|LUTEOLIN-7-O-BETA-D-GLUCOSIDE|LUTEOLIN-7-O-GLUCOSIDE|LUTEOLIN-7-D-GLUCOSIDE|CINAROSIDE	PEFNSGRTCBGNAN-QNDFHXLGSA-N
Prunella vulgaris	PEONIN	IPVSUYLZIAYTOK-VWVAXHKFSA-O
Prunella vulgaris	OCTACOSANATE|OCTACOSANOIC-ACID	UTOPWMOLSKOLTQ-UHFFFAOYSA-N
Prunella vulgaris	TETRADECENOIC-ACID|MYRISTIC-ACID|TETRADECANOIC-ACID	TUNFSRHWOTWDNC-UHFFFAOYSA-N
Prunella vulgaris	HYPERIN	OVSQVDMCBVZWGM-SJWGPRHPSA-N
Prunella vulgaris	URSOLIC-ACID|URSOLIC-ACID-I|BETA-URSOLIC-ACID	WCGUUGGRBIKTOS-GPOJBZKASA-N
Prunella vulgaris	D-SUCROSE|SACCAROSE|SACCHAROSE|SUCROSE|INULIN	CZMRCDWAGMRECN-UGDNZRGBSA-N
Prunella vulgaris	LINALOOL|(-)-LINALOOL|(R)-LINALOOL|L-LINALOOL	CDOSHBSSFJOMGT-JTQLQIEISA-N
Prunella vulgaris	SUCROSE	CZMRCDWAGMRECN-ZTGZREJBSA-N
Prunella vulgaris	LINALOL|LINALOOL|(-)-LINALOOL	CDOSHBSSFJOMGT-UHFFFAOYSA-N
Prunella vulgaris	POTASSIUM|POTASSIUM-OXIDE|POTASSIUM-CHLORIDE|K2O	NTTOTNSKUYCDAV-UHFFFAOYSA-N
Prunella vulgaris	DEXTROSE|GLUCOSE	WQZGKKKJIJFFOK-GASJEMHNSA-N
Prunella vulgaris	D-CAMPHOR|CAMPHOR	DSSYKIVIOFKYAU-UHFFFAOYSA-N
Prunella vulgaris	OLEANOLIC-ACID	MIJYXULNPSFWEK-LXLHWSNGSA-N
Prunella vulgaris	VITAMIN-A	FPIPGXGPPPQFEQ-OVSJKPMPSA-N
Prunella vulgaris	AESCULOSIDE|ESCULIN|AESCULIN|AESCULETIN	XHCADAYNFIFUHF-WDJGLXJESA-N
Prunella vulgaris	MANGANESE	PWHULOQIROXLJO-UHFFFAOYSA-N
Prunella vulgaris	SPINASTEROL|ALPHA-SPINASTEROL|CHONDRILLASTEROL	JZVFJDZBLUFKCA-FXIAWGAOSA-N
Prunella vulgaris	URSOLIC-ACID|URSOLIC-ACID-I	WCGUUGGRBIKTOS-UHFFFAOYSA-N
Prunella vulgaris	SERICOSIDE	CMZFNIMQBCBHEX-JRIAKSEUSA-N
Prunella vulgaris	RUTIN	IKGXIBQEEMLURG-FNKLJWKFSA-N
Prunella vulgaris	CYANIDIN	VEVZSMAEJFVWIL-UHFFFAOYSA-O
Prunella vulgaris	(+)-CAMPHOR|D-CAMPHOR|CAMPHOR	DSSYKIVIOFKYAU-XCBNKYQSSA-N
Prunella vulgaris	BETA-AMYRIN	JFSHUTJDVKUMTJ-QKAPCWNWSA-N
Prunella vulgaris	QUERCITIN-3-0-BETA-D-GLUCOSIDE|QUERCETIN-3-RHAMNOGLUCOSIDE|VIOLAQUERCITRIN|QUERCETIN-3-O-RUTINOSIDE|RUTOSIDE|RUTIN|QUERCITIN-3-0-RHAMNOGLUCOSIDE	IKGXIBQEEMLURG-NVPNHPEKSA-N
Prunella vulgaris	HYPERIN|QUERCETIN-3-O-GALACTOSIDE|ISOQUERCITRIN|HYPEROSIDE	OVSQVDMCBVZWGM-UHFFFAOYSA-N
Prunella vulgaris	QUERCETIN|QUERCETOL	REFJWTPEDVJJIY-UHFFFAOYSA-N
Prunella vulgaris	LUPEOL	MQYXUWHLBZFQQO-JGGBMTAGSA-N
Prunella vulgaris	GALACTOSE|D-MANNOSE|MANNOSE|GLUCOSE	WQZGKKKJIJFFOK-QTVWNMPRSA-N
Prunella vulgaris	LUTEOLIN|LUTEOLOL	IQPNAANSBPBGFQ-UHFFFAOYSA-N
Prunella vulgaris	UMBELLIFERONE|7-HYDROXYCOUMARIN	ORHBXUUXSCNDEV-UHFFFAOYSA-N
Prunella vulgaris	(-)-BETA-PINENE|BETA-PINENE|(-)-PINENE|PINENE	WTARULDDTDQWMU-IUCAKERBSA-N
Prunella vulgaris	VITAMIN-A	FPIPGXGPPPQFEQ-IOUUIBBYSA-N
Prunella vulgaris	SUCROSE	CZMRCDWAGMRECN-MMVSOTICSA-N
Prunella vulgaris	MYRCENE|ALPHA-MYRCENE	VYBREYKSZAROCT-UHFFFAOYSA-N
Prunella vulgaris	LINALOOL|(-)-LINALOOL|(+)-LINALOOL|S-(+)-LINALOOL	CDOSHBSSFJOMGT-SNVBAGLBSA-N
Prunella vulgaris	CIS-CAFFEIC-ACID	QAIPRVGONGVQAS-RQOWECAXSA-N
Prunella vulgaris	LUPENOL|LUPEOL	MQYXUWHLBZFQQO-QGTGJCAVSA-N
Prunella vulgaris	LINALYL-ACETATE|LINALOOL-ACETATE|LINALOL-ACETATE	UWKAYLJWKGQEPM-UHFFFAOYSA-N
Prunella vulgaris	MALVIDIN-3,5-DIGLUCOSIDE|MALVIDIN-3,5-DI-O-BETA-D-GLUCOSIDE	CILLXFBAACIQNS-BTXJZROQSA-O
Prunella vulgaris	CYNAROSIDE|LUTEOLIN-7-O-MONOGLUCOSIDE|LUTEOLIN-7-O-BETA-D-GLUCOPYRANOSIDE|LUTEOLIN-7-GLUCOSIDE|CYANAROSIDE	PEFNSGRTCBGNAN-UHFFFAOYSA-N
Prunella vulgaris	L-ASCORBIC-ACID|ASCORBIC-ACID	TYQCGQRIZGCHNB-JLAZNSOCSA-N
Prunella vulgaris	STEARIC-ACID	QIQXTHQIDYTFRH-UHFFFAOYSA-N
Prunella vulgaris	BETA-AMYRIN	JFSHUTJDVKUMTJ-UHFFFAOYSA-N
Prunella vulgaris	1,8-CINEOLE	WEEGYLXZBRQIMU-WAAGHKOSSA-N
Prunella vulgaris	PHYTOSTEROL|SITOSTEROL|GAMMA-SITOSTEROL|NIMBOSTEROL|BETA-SITOSTEROL|SITOSTEROL-6'-LINOLYLGLUCOSIDE|(-)-BETA-SITOSTEROL	KZJWDPNRJALLNS-VJSFXXLFSA-N
Prunella vulgaris	EUCALYPTOL|CINEOL|1,8-CINEOL|CINEOLE|1,8-CINEOLE	WEEGYLXZBRQIMU-UHFFFAOYSA-N
Prunella vulgaris	AUCUBIN	RJWJHRPNHPHBRN-UPEZATLISA-N
Prunella vulgaris	ESCULETIN|AESCULETOL|AESCULETIN	ILEDWLMCKZNDJK-UHFFFAOYSA-N
Prunella vulgaris	(+)-FENCHONE	LHXDLQBQYFFVNW-XCBNKYQSSA-N
Prunella vulgaris	D-GLUCOSE|DEXTROSE|ALPHA-GLUCOSE|GLUCOSE	WQZGKKKJIJFFOK-DVKNGEFBSA-N
Prunella vulgaris	SACCHAROSE|SUCROSE|INULIN	CZMRCDWAGMRECN-UHFFFAOYSA-N
Gentiana lutea	P-CYMENOL|CARVACROL	RECUKUPTGUEGMW-UHFFFAOYSA-N
Gentiana lutea	ANEURINE|THIAMINE|THIAMIN|VITAMIN-B-1|VIT-B-1	JZRWCGZRTZMZEH-UHFFFAOYSA-N
Gentiana lutea	WATER	XLYOFNOQVPJJNP-UHFFFAOYSA-N
Gentiana lutea	CHROMIUM	VYZAMTAEIAYCRO-UHFFFAOYSA-N
Gentiana lutea	ALUMINUM	AZDRQVAHHNSJOQ-UHFFFAOYSA-N
Gentiana lutea	NIACIN|NICOTINIC-ACID	PVNIIMVLHYAWGP-UHFFFAOYSA-N
Gentiana lutea	CARVENE|L-LIMONENE|LIMONENE|(-)-LIMONENE|DIPENTENE	XMGQYMWWDOXHJM-SNVBAGLBSA-N
Gentiana lutea	(+)-GENTIOLACTONE	YOWUDEPRYODFBZ-SNVBAGLBSA-N
Gentiana lutea	BETA-AMYRIN	JFSHUTJDVKUMTJ-KOMNAURRSA-N
Gentiana lutea	LUPEOL	MQYXUWHLBZFQQO-UHFFFAOYSA-N
Gentiana lutea	BETA-CAROTENE|ZETA-CAROTENE	BIWLELKAFXRPDE-WTXAYMOSSA-N
Gentiana lutea	BETA-AMYRIN	JFSHUTJDVKUMTJ-XCIKXOPNSA-N
Gentiana lutea	TIN	OLGIDLDDXHSYFE-UHFFFAOYSA-N
Gentiana lutea	IRON-OXIDE|IRON	XEEYBQQBJWHFJM-UHFFFAOYSA-N
Gentiana lutea	DL-TERPINEOL|D-ALPHA-TERPINEOL|TERPINENOL|ALPHA-TERPINEOL|D-TERPINEOL|I-TERPINEOL|TERPINEOL	WUOACPNHFRMFPN-UHFFFAOYSA-N
Gentiana lutea	VIT-B2|RIBOFLAVIN|VITAMIN-B-2	AUNGANRZJHBGPY-SCRDCRAPSA-N
Gentiana lutea	ZINC	HCHKCACWOHOZIP-UHFFFAOYSA-N
Gentiana lutea	GENTIOSIDE	IBFYXTRXDNAPMM-OMRBYNISSA-N
Gentiana lutea	PECTIC-ACID|PECTIN|CALCIUM-PECTATE|POLYGALACTURONIC-ACID	AEMOLEFTQBMNLQ-BKBMJHBISA-N
Gentiana lutea	SYRINGIC-ACID	JMSVCTWVEWCHDZ-UHFFFAOYSA-N
Gentiana lutea	2,3',4,6-TETRAHYDROXYBENZOPHENONE	QWRYPHZJTWQLFX-UHFFFAOYSA-N
Gentiana lutea	BETULIN-3-O-PALMITATE	NAXJLYBHSMUSAV-HXWJZUGBSA-N
Gentiana lutea	GENTIANOSE	MUPFEKGTMRGPLJ-WSCXOGSTSA-N
Gentiana lutea	GENTIOPICRIN|GENTIOPICROSIDE	DUAGQYUORDTXOR-GPQRQXLASA-N
Gentiana lutea	1-HYDROXY-3,7-DIMETHOXYXANTHONE	FWBPZAVSTQBRKT-UHFFFAOYSA-N
Gentiana lutea	NICOTINIC-ACID-AMIDE|NICOTINAMIDE|NIACINAMIDE	DFPAKSUCGFBDDF-UHFFFAOYSA-N
Gentiana lutea	LOGANIC-ACID	JNNGEAWILNVFFD-VFLVOCKCSA-N
Gentiana lutea	AMYRIN|BETA-AMYRIN	JFSHUTJDVKUMTJ-QHPUVITPSA-N
Gentiana lutea	COBALT	GUTLYIVDDKVIGB-UHFFFAOYSA-N
Gentiana lutea	RIBOFLAVIN|VITAMIN-B-2	AUNGANRZJHBGPY-UHFFFAOYSA-N
Gentiana lutea	MANGIFERIN	AEDDIBAIWPIIBD-JGPIWLIHSA-N
Gentiana lutea	GENTIALUTINE	NEMKMHUCTPZMSO-UHFFFAOYSA-N
Gentiana lutea	SWEROSIDE	VSJGJMKGNMDJCI-HCWFURPSSA-N
Gentiana lutea	MANGIFERIN	AEDDIBAIWPIIBD-UHFFFAOYSA-N
Gentiana lutea	AMAROGENTIN	DBOVHQOUSDWAPQ-KUGCKIRFSA-N
Gentiana lutea	GENTISIN	XOXYHGOIRWABTC-UHFFFAOYSA-N
Gentiana lutea	GENTIOSIDE	IBFYXTRXDNAPMM-JONIVODWSA-N
Gentiana lutea	CAFFEIC-ACID|TRANS-CAFFEIC-ACID|DIHYDROXYCINNAMIC-ACID|3,4-DIHYDROXYCINNAMIC-ACID	QAIPRVGONGVQAS-DUXPYHPUSA-N
Gentiana lutea	URS-12-EN-3-ONE	DIFWJJFSELKWGA-IPQOMUISSA-N
Gentiana lutea	SWEROSIDE	VSJGJMKGNMDJCI-ZASXJUAOSA-N
Gentiana lutea	SWERTIAMARIN	HEYZWPRKKUGDCR-MQADLURCSA-N
Gentiana lutea	HEXACOSANAL	QAXXQMIHMLTJQI-UHFFFAOYSA-N
Gentiana lutea	SWEROSIDE	VSJGJMKGNMDJCI-LBSCNUBJSA-N
Gentiana lutea	1,3,7-TRIMETHOXYXANTHONE	WEMBDZBXWPOBGL-UHFFFAOYSA-N
Gentiana lutea	SUCROSE	CZMRCDWAGMRECN-GDQSFJPYSA-N
Gentiana lutea	SUCROSE	CZMRCDWAGMRECN-FXFGBNHJSA-N
Gentiana lutea	GENTIOSIDE	IBFYXTRXDNAPMM-UHFFFAOYSA-N
Gentiana lutea	GENTIOBIOSE	DLRVVLDZNNYCBX-LIZSDCNHSA-N
Gentiana lutea	LINALOL|LINALOOL|(-)-LINALOOL	CDOSHBSSFJOMGT-UHFFFAOYSA-N
Gentiana lutea	SQUALENE	YYGNTYWPHWGJRM-AAJYLUCBSA-N
Gentiana lutea	STIGMASTEROL	HCXVJBMSMIARIN-BGDBIVFESA-N
Gentiana lutea	ASCORBIC-ACID	TYQCGQRIZGCHNB-MVHIGOERSA-N
Gentiana lutea	AMAROSWERIN	UZYZCCWBBBCDAD-WCYQFIIKSA-N
Gentiana lutea	SELENIUM	SPVXKVOXSXTJOY-UHFFFAOYSA-N
Gentiana lutea	LIMONENE|LINONENE|L-LIMONENE|DIPENTENE|(-)-LIMONENE|(+)-MENTHA-1,8-DIENE|DL-LIMONENE|TERPINOLENE	XMGQYMWWDOXHJM-UHFFFAOYSA-N
Gentiana lutea	BETA-AMYRINE	UJVMWSDHSPRSSY-YARPNPCFSA-N
Gentiana lutea	INULIN	JYJIGFIDKWBXDU-UHFFFAOYSA-N
Gentiana lutea	ERYTHRODIOL-3-O-PALMITATE	IASWBPPOMIXEDC-JWDOTDQPSA-N
Gentiana lutea	ALPHA-AMYRINE	SGYDZCYMKXFTKG-NISMZSMJSA-N
Gentiana lutea	SILICON	BLRPTPMANUNPDV-UHFFFAOYSA-N
Gentiana lutea	TETRACOSANAL	HGINZVDZNQJVLQ-UHFFFAOYSA-N
Gentiana lutea	ISOMALTOSE|GENTIOBIOSE	DLRVVLDZNNYCBX-UHFFFAOYSA-N
Gentiana lutea	PROTOCATECHUIC-ACID|3,4-DIHYDROXYBENZOIC-ACID|O-PROTOCATECHUIC-ACID	YQUVCSBJEUQKSH-UHFFFAOYSA-N
Gentiana lutea	D-SUCROSE|SACCAROSE|SACCHAROSE|SUCROSE|INULIN	CZMRCDWAGMRECN-UGDNZRGBSA-N
Gentiana lutea	LINALOOL|(-)-LINALOOL|(R)-LINALOOL|L-LINALOOL	CDOSHBSSFJOMGT-JTQLQIEISA-N
Gentiana lutea	SUCROSE	CZMRCDWAGMRECN-ZTGZREJBSA-N
Gentiana lutea	PHOSPHORUS	XYFCBTPGUUZFHI-UHFFFAOYSA-N
Gentiana lutea	POTASSIUM|POTASSIUM-OXIDE|POTASSIUM-CHLORIDE|K2O	NTTOTNSKUYCDAV-UHFFFAOYSA-N
Gentiana lutea	3-O-BETA-D-GLUCOPYRANOSYL-SITOSTEROL	NPJICTMALKLTFW-PYOHOBBFSA-N
Gentiana lutea	MAGNESIUM	RSHAOIXHUHAZPM-UHFFFAOYSA-N
Gentiana lutea	SINAPIC-ACID|TRANS-SINAPIC-ACID|SINAPIC-ACID-ESTER	PCMORTLOPMLEFB-ONEGZZNKSA-N
Gentiana lutea	STARCH	YJISHJVIRFPGGN-UHFFFAOYSA-N
Gentiana lutea	GENTISINIC-ACID|2,5-DIHYDROXYBENZOIC-ACID|GENTISIC-ACID	WXTMDXOMEHJXQO-UHFFFAOYSA-N
Gentiana lutea	MANGIFERIN	AEDDIBAIWPIIBD-ZJKJAXBQSA-N
Gentiana lutea	MANGANESE	PWHULOQIROXLJO-UHFFFAOYSA-N
Gentiana lutea	CAMPESTEROL	SGNBVLSWZMBQTH-PODYLUTMSA-N
Gentiana lutea	GENTIOSIDE	DNIDCQUDANKQTL-AQIMZYODSA-N
Gentiana lutea	BETA-CAROTENE	OENHQHLEOONYIE-LZMNTPPDSA-N
Gentiana lutea	DOCOSANAL	ULCXRAFXRZTNRO-UHFFFAOYSA-N
Gentiana lutea	(+)-LIMONENE|(+)-S-CARVONE|LIMONENE|CARVENE|DIPENTENE|(-)-LIMONENE|D-LIMONENE	XMGQYMWWDOXHJM-JTQLQIEISA-N
Gentiana lutea	PECTIN	AEMOLEFTQBMNLQ-DTEWXJGMSA-N
Gentiana lutea	I-TERPINEOL|TERPINEOL|ALPHA-TERPINEOL	WUOACPNHFRMFPN-VIFPVBQESA-N
Gentiana lutea	SCABRAN-G3	GLKHPOLKBCCZTM-KNCCUSLYSA-N
Gentiana lutea	GENTIANOSE	MUPFEKGTMRGPLJ-OBAJZVCXSA-N
Gentiana lutea	UVAOL-3-O-PALMITATE	WRLVTAGLGBPGQA-IRJKKAKDSA-N
Gentiana lutea	BETA-AMYRIN	JFSHUTJDVKUMTJ-QKAPCWNWSA-N
Gentiana lutea	GENTISIN|ISOGENTISIN	FVIYCYAHKMJVJK-UHFFFAOYSA-N
Gentiana lutea	LUPEOL	MQYXUWHLBZFQQO-JGGBMTAGSA-N
Gentiana lutea	GENTIOBIOSE	DLRVVLDZNNYCBX-CQUJWQHSSA-N
Gentiana lutea	BETA-CAROTENE|PROVITAMIN-A|CAROTENE	OENHQHLEOONYIE-JLTXGRSLSA-N
Gentiana lutea	INULIN	JYJIGFIDKWBXDU-BGFMQGGRSA-N
Gentiana lutea	LINALOOL|(-)-LINALOOL|(+)-LINALOOL|S-(+)-LINALOOL	CDOSHBSSFJOMGT-SNVBAGLBSA-N
Gentiana lutea	LUPENOL|LUPEOL	MQYXUWHLBZFQQO-QGTGJCAVSA-N
Gentiana lutea	GENTISEIN	JJUNZBRHHGLJQW-UHFFFAOYSA-N
Gentiana lutea	AMAROGENTIN	DBOVHQOUSDWAPQ-BMXNZVMGSA-N
Gentiana lutea	I-TERPINEOL|TERPINEOL|ALPHA-TERPINEOL	WUOACPNHFRMFPN-SECBINFHSA-N
Gentiana lutea	PYROCATECHUIC-ACID	GLDQAMYCGOIJDV-UHFFFAOYSA-N
Gentiana lutea	SWEROSIDE	VSJGJMKGNMDJCI-UHFFFAOYSA-N
Gentiana lutea	SWERTIAMARIN	HEYZWPRKKUGDCR-QBXMEVCASA-N
Gentiana lutea	L-ASCORBIC-ACID|ASCORBIC-ACID	TYQCGQRIZGCHNB-JLAZNSOCSA-N
Gentiana lutea	ALPHA-TOCOPHEROLQUINONE	LTVDFSLWFKLJDQ-DKGMKSHISA-N
Gentiana lutea	BETA-AMYRIN	JFSHUTJDVKUMTJ-UHFFFAOYSA-N
Gentiana lutea	PHYTOSTEROL|SITOSTEROL|GAMMA-SITOSTEROL|NIMBOSTEROL|BETA-SITOSTEROL|SITOSTEROL-6'-LINOLYLGLUCOSIDE|(-)-BETA-SITOSTEROL	KZJWDPNRJALLNS-VJSFXXLFSA-N
Gentiana lutea	SUCROSE	CZMRCDWAGMRECN-MMVSOTICSA-N
Gentiana lutea	SACCHAROSE|SUCROSE|INULIN	CZMRCDWAGMRECN-UHFFFAOYSA-N
Cucurbita maxima	ALPHA-LINOLEIC-ACID|LINOLEIC-ACID	OYHQOLUKZRVURQ-HZJYTTRNSA-N
Cucurbita maxima	GIBBERELLIN-A25	XOUJCIPAKFLTCI-POPXMCHDSA-N
Cucurbita maxima	GIBBERELLIN-A44	KSBJAONOPKRVRR-YTJHIPEWSA-N
Cucurbita maxima	GIBBERELLIN-A48	NAGWIYJMYLCZLH-WFKDPNPLSA-N
Cucurbita maxima	OLEIC-ACID	ZQPPMHVWECSIRJ-KTKRTIGZSA-N
Cucurbita maxima	WATER	XLYOFNOQVPJJNP-UHFFFAOYSA-N
Cucurbita maxima	GIBBERELLIN-A15	MXCOJKLBLFWFNI-VBFYFJBNSA-N
Cucurbita maxima	GIBBERELLIN-A53|GIBBERELLIN-A-53	CZEMYYICWZPENF-VOLTXKGXSA-N
Cucurbita maxima	IRON-OXIDE|IRON	XEEYBQQBJWHFJM-UHFFFAOYSA-N
Cucurbita maxima	GIBBERELLIN-A39	LKLDZCIWUDJQCF-OZPHONOWSA-N
Cucurbita maxima	ENT-COPALYL-DIPHOSPHATE	JCAIWDXKLCEQEO-KSAZJLBOSA-N
Cucurbita maxima	GIBBERELLIN-A9	MHVYWTXXZIFXDT-YGNOGLJPSA-N
Cucurbita maxima	GIBBERELLIN-A28	YPZCOEDTKIYBEB-ZVBXRXONSA-N
Cucurbita maxima	GIBBERELLIN-A74	RKDWVYHBXWADKI-TVOMTTNMSA-N
Cucurbita maxima	GIBBERELLIN-A4|GIBBERELLIN-A-4	RSQSQJNRHICNNH-NFMPGMCNSA-N
Cucurbita maxima	GIBBERELLIN-A37	QYXZQZMPZUEEML-SQLMURCQSA-N
Cucurbita maxima	CUCURBITAXANTHIN-A	LMIFPRVTIOZTJN-SZYTUFQFSA-N
Cucurbita maxima	ZINC	HCHKCACWOHOZIP-UHFFFAOYSA-N
Cucurbita maxima	GIBBERELLIN-A111	RVQCZHZIMZMGAD-MVFRLJDCSA-N
Cucurbita maxima	PALMITIC-ACID|HEXADECANOIC-ACID	IPCSVZSSVZVIGE-UHFFFAOYSA-N
Cucurbita maxima	GIBBERELLIN-A49	NAGWIYJMYLCZLH-QOPQSTFASA-N
Cucurbita maxima	GIBBERELLIN-A24	QQRSSHFHXYSOMF-CXXOJBQZSA-N
Cucurbita maxima	GIBBERELLIN-A43	FQTLNSKVFLETSS-QBCIWLIXSA-N
Cucurbita maxima	GIBBERELLIN-A8|GIBBERELLIN-A-8	WZRRJZYYGOOHRC-UQJCXHNCSA-N
Cucurbita maxima	GIBBERELLIN-A12	UJFQJDAESQJXTG-UFUZVNNQSA-N
Cucurbita maxima	ARACHIDIC-ACID	VKOBVWXKNCXXDE-UHFFFAOYSA-N
Cucurbita maxima	GIBBERELLIN-A58	VFOHPKBOIYTDJT-CCGADRJDSA-N
Cucurbita maxima	GIBBERELLIN-A38	GAQSCLQIDHHPEE-ARCJWRNYSA-N
Cucurbita maxima	GIBBERELLIN-A13	UYRCHWLYXIQJKK-HMRRIYTKSA-N
Cucurbita maxima	GIBBERELLIN-A1	JLJLRLWOEMWYQK-OBDJNFEBSA-N
Cucurbita maxima	STEARIC-ACID	QIQXTHQIDYTFRH-UHFFFAOYSA-N
Cucurbita maxima	MAGNESIUM	RSHAOIXHUHAZPM-UHFFFAOYSA-N
Cucurbita maxima	COPPER	RYGMFSIKBFXOCR-UHFFFAOYSA-N
Cucurbita maxima	GIBBERELLIN-A12-ALDEHYDE	ZCTUNYRXJKLWPY-LLCOKINKSA-N
Cucurbita maxima	(-)-JASMONIC-ACID|JASMONIC-ACID	ZNJFBWYDHIGLCU-HWKXXFMVSA-N
Cucurbita maxima	GIBBERELLIN-A17	AUKMHZZVLPQAOX-CDNFTCFOSA-N
Cucurbita maxima	GIBBERELLIN-A36	JZBLVVPDEDCVQA-SQLMURCQSA-N
Cucurbita maxima	CUCURBITAXANTHIN-B	WBXYNQBROQPCES-UVAHLJQVSA-N
Cucurbita maxima	LINOLEIC-ACID	OYHQOLUKZRVURQ-IXWMQOLASA-N
Cucurbita maxima	GIBBERELLIN-A85	SLQZHTBESWFEAE-BPDLVRBNSA-N
Cucurbita maxima	GIBBERELLIN-A-19|GIBBERELLIN-A19	VNCQCPQAMDQEBY-YTJHIPEWSA-N
Salix alba	ANEURINE|THIAMINE|THIAMIN|VITAMIN-B-1|VIT-B-1	JZRWCGZRTZMZEH-UHFFFAOYSA-N
Salix alba	ASRAGALIN|KAEMPFEROL-3-O-BETA-D-GLUCOSIDE|KAEMPFEROL-3-O-GLUCOSIDE|ASTRAGALIN|KAEMPFEROL-3-0-GLUCOSIDE	JPUKWEQWGBDDQB-QSOFNFLRSA-N
Salix alba	WATER	XLYOFNOQVPJJNP-UHFFFAOYSA-N
Salix alba	CHROMIUM	VYZAMTAEIAYCRO-UHFFFAOYSA-N
Salix alba	XYLOSE	SRBFZHDQGSBBOR-SQOUGZDYSA-N
Salix alba	ALUMINUM	AZDRQVAHHNSJOQ-UHFFFAOYSA-N
Salix alba	NIACIN|NICOTINIC-ACID	PVNIIMVLHYAWGP-UHFFFAOYSA-N
Salix alba	QUERCETIN-3-O-GLUCOSIDE|TRIFOLIIN|HIRSUTRIN|ISOQUERCETIN|ISOQUERCITRIN|QUERCETOL-3-GLUCOSIDE|QUERCETIN-3-BETA-D-GLUCOSIDE|QUERCETIN-3-O-BETA-D-GLUCOSIDE|QUERCETIN-3-O-BETA-D-GLUCOPYRANOSIDE	OVSQVDMCBVZWGM-QSOFNFLRSA-N
Salix alba	NARCISSIN|ISORHAMNETIN-3-RUTINOSIDE	UIDGLYUNOUKLBM-GEBJFKNCSA-N
Salix alba	BETA-CAROTENE|ZETA-CAROTENE	BIWLELKAFXRPDE-WTXAYMOSSA-N
Salix alba	TREMULOIDIN	FWPNCAYVELBDRB-BFMVXSJESA-N
Salix alba	TIN	OLGIDLDDXHSYFE-UHFFFAOYSA-N
Salix alba	GRANDIDENTATIN	ZTMPDTJBTNGZJH-AGWKJEBHSA-N
Salix alba	GLUCOMANNAN|MANNAN	LUEWUZLMQUOBSB-WKELFECASA-N
Salix alba	EPICATECHIN|(+)-CATECHOL|D-CATECHOL|(-)-EPICATECHIN|CATECHIN|(+)-CATECHIN|D-CATECHIN|DL-CATECHOL	PFTAWBLQPZVEMU-DZGCQCFKSA-N
Salix alba	IRON-OXIDE|IRON	XEEYBQQBJWHFJM-UHFFFAOYSA-N
Salix alba	AMENTOFLAVONE|BIAPIGENIN	YUSWMAULDXZHPY-UHFFFAOYSA-N
Salix alba	ALPHA-GLUCAN	PTHCMJGKKRQCBF-MAAAUORTSA-N
Salix alba	VIT-B2|RIBOFLAVIN|VITAMIN-B-2	AUNGANRZJHBGPY-SCRDCRAPSA-N
Salix alba	ZINC	HCHKCACWOHOZIP-UHFFFAOYSA-N
Salix alba	PECTIC-ACID|PECTIN|CALCIUM-PECTATE|POLYGALACTURONIC-ACID	AEMOLEFTQBMNLQ-BKBMJHBISA-N
Salix alba	DELPHINIDIN	JKHRCGUTYDNCLE-UHFFFAOYSA-O
Salix alba	COBALT	GUTLYIVDDKVIGB-UHFFFAOYSA-N
Salix alba	SALICIN	NGFMICBWJRZIBI-UJPOAAIJSA-N
Salix alba	RIBOFLAVIN|VITAMIN-B-2	AUNGANRZJHBGPY-UHFFFAOYSA-N
Salix alba	CHOLINE-SALICYLATE|SALICYLIC-ACID|O-HYDROXYBENZOIC-ACID	YGSDEFSMJLZEOE-UHFFFAOYSA-N
Salix alba	RHAMNOSE	SHZGCJCMOBCMKK-HGVZOGFYSA-N
Salix alba	EPICATECHIN|(-)-EPICATECHOL|CATECHIN|EPICATECHOL|(-)-EPICATECHIN	PFTAWBLQPZVEMU-UKRRQHHQSA-N
Salix alba	D-XYLOSE|XYLOSE	PYMYPHUHKUWMLA-VPENINKCSA-N
Salix alba	EPICATECHIN|EPICATECHOL|(-)-EPICATECHIN|CATECHIN|(-)-EPICATECHOL|DL-CATECHOL	PFTAWBLQPZVEMU-UHFFFAOYSA-N
Salix alba	TREMULOIDIN	FWPNCAYVELBDRB-UHFFFAOYSA-N
Salix alba	CAFFEIC-ACID|TRANS-CAFFEIC-ACID|DIHYDROXYCINNAMIC-ACID|3,4-DIHYDROXYCINNAMIC-ACID	QAIPRVGONGVQAS-DUXPYHPUSA-N
Salix alba	SALICYL-ALCOHOL	CQRYARSYNCAZFO-UHFFFAOYSA-N
Salix alba	L-RHAMNOSE|RHAMNOSE|FUCOSE	SHZGCJCMOBCMKK-JFNONXLTSA-N
Salix alba	SALIREPOSIDE	UQCOPGRRWQCCFR-BFMVXSJESA-N
Salix alba	GALACTOSE|HEXOSE|D-GALACTOSE	WQZGKKKJIJFFOK-PHYPRBDBSA-N
Salix alba	SALICIN	NGFMICBWJRZIBI-JZRPKSSGSA-N
Salix alba	CUPRESSUFLAVONE|BIAPIGENIN	LADPNODMUXOPRG-UHFFFAOYSA-N
Salix alba	D-ARABINOSE|ARABINOSE|L-ARABINOSE	SRBFZHDQGSBBOR-UHFFFAOYSA-N
Salix alba	D-ARABINOSE|ARABINOSE|XYLOSE|PENTOSE	PYMYPHUHKUWMLA-VAYJURFESA-N
Salix alba	ALPHA-GLUCAN	PTHCMJGKKRQCBF-OLYDTGNASA-N
Salix alba	BETA-GLUCOSE|D-GLUCOSE|DEXTROSE|GLUCOSE	WQZGKKKJIJFFOK-VFUOTHLCSA-N
Salix alba	MAGNESIUM	RSHAOIXHUHAZPM-UHFFFAOYSA-N
Salix alba	ASCORBIC-ACID	TYQCGQRIZGCHNB-MVHIGOERSA-N
Salix alba	D-ARABINOSE|ARABINOSE	PYMYPHUHKUWMLA-WDCZJNDASA-N
Salix alba	SELENIUM	SPVXKVOXSXTJOY-UHFFFAOYSA-N
Salix alba	ARABINOSE|XYLOSE	PYMYPHUHKUWMLA-UHFFFAOYSA-N
Salix alba	ARABINOSE	PYMYPHUHKUWMLA-MROZADKFSA-N
Salix alba	SALICORTIN	CZDNLUMNELLDDD-UMMHHTIASA-N
Salix alba	P-COUMARIC-ACID|4-HYDROXYCINNAMIC-ACID|P-COUMARINIC-ACID|TRANS-P-COUMARIC-ACID|P-HYDROXYCINNAMIC-ACID	NGSWKAQJJWESNS-ZZXKWVIFSA-N
Salix alba	RHAMNAZIN-3-GLUCOSIDE	NULDUMWEBSEHPR-PRMNUAKVSA-N
Salix alba	SILICON	BLRPTPMANUNPDV-UHFFFAOYSA-N
Salix alba	GRANDIDENTATIN	ZTMPDTJBTNGZJH-MUIGIDRRSA-N
Salix alba	QUERCIMERETRIN|QUERCIMERITRIN	BBFYUPYFXSSMNV-LQPIGNGESA-N
Salix alba	PHOSPHORUS	XYFCBTPGUUZFHI-UHFFFAOYSA-N
Salix alba	POTASSIUM|POTASSIUM-OXIDE|POTASSIUM-CHLORIDE|K2O	NTTOTNSKUYCDAV-UHFFFAOYSA-N
Salix alba	CYANIDIN-3-O-BETA-D-GLUCOSIDE|CHRYSANTHEMIN|CYANIDIN-3-GLUCOSIDE|CYANIDIN-3-MONOGLUCOSIDE|CYANIDIN-3-O-GLUCOSIDE	RKWHWFONKJEUEF-GQUPQBGVSA-O
Salix alba	DEXTROSE|GLUCOSE	WQZGKKKJIJFFOK-GASJEMHNSA-N
Salix alba	STARCH	YJISHJVIRFPGGN-UHFFFAOYSA-N
Salix alba	QUERCETIN-3,3'-O-BETA-D-GLUCOSIDE|QUERCIMERETRIN|QUERCIMERITRIN	BBFYUPYFXSSMNV-HMGRVEAOSA-N
Salix alba	MANGANESE	PWHULOQIROXLJO-UHFFFAOYSA-N
Salix alba	CATECHIN|(-)-CATECHIN	PFTAWBLQPZVEMU-HIFRSBDPSA-N
Salix alba	BETA-CAROTENE	OENHQHLEOONYIE-LZMNTPPDSA-N
Salix alba	ARABINOSE	PYMYPHUHKUWMLA-DEOSMSJNSA-N
Salix alba	RUTIN	IKGXIBQEEMLURG-FNKLJWKFSA-N
Salix alba	CYANIDIN	VEVZSMAEJFVWIL-UHFFFAOYSA-O
Salix alba	PECTIN	AEMOLEFTQBMNLQ-DTEWXJGMSA-N
Salix alba	EPIGALLOCATECHOL|(+)-EPIGALLOCATECHIN|GALLOCATECHOL|(+)-GALLOCATECHIN|(-)-EPIGALLOCATECHIN|(-)-GALLOCATECHIN|(+)-GALLOCATECHOL|(DL)-GALLOCATECHIN|(-)-EPI-GALLO-CATECHOL|D-GALLOCATECHIN|GALLOCATECHIN|EPIGALLOCATECHIN	XMOCLSLCDHWDHP-SWLSCSKDSA-N
Salix alba	SALIDROSIDE|RHODIOLOSIDE	ILRCGYURZSFMEG-RKQHYHRCSA-N
Salix alba	NARCISSIN	UIDGLYUNOUKLBM-WJVJOWDZSA-N
Salix alba	HYPERIN|QUERCETIN-3-O-GALACTOSIDE|ISOQUERCITRIN|HYPEROSIDE	OVSQVDMCBVZWGM-UHFFFAOYSA-N
Salix alba	QUERCETIN|QUERCETOL	REFJWTPEDVJJIY-UHFFFAOYSA-N
Salix alba	GALACTOSE|D-MANNOSE|MANNOSE|GLUCOSE	WQZGKKKJIJFFOK-QTVWNMPRSA-N
Salix alba	QUERCETIN-3-O-GLUCOSIDE|ISOQUERCITRIN|TRIFOLIIN	OVSQVDMCBVZWGM-ZVIPYZFUSA-N
Salix alba	BETA-CAROTENE|PROVITAMIN-A|CAROTENE	OENHQHLEOONYIE-JLTXGRSLSA-N
Salix alba	QUERCITIN-3-0-BETA-D-GLUCOSIDE|QUERCETIN-3-RHAMNOGLUCOSIDE|VIOLAQUERCITRIN|QUERCETIN-3-O-RUTINOSIDE|RUTOSIDE|RUTIN|QUERCITIN-3-0-RHAMNOGLUCOSIDE	IKGXIBQEEMLURG-NVPNHPEKSA-N
Salix alba	GRANDIDENTATIN	ZTMPDTJBTNGZJH-DOEKUWPZSA-N
Salix alba	5-HYDROXY-PIPECOLIC-ACID	RKEYKDXXZCICFZ-UHFFFAOYSA-N
Salix alba	APIGENIN	KZNIFHPLKGYRTM-UHFFFAOYSA-N
Salix alba	SALICIN	NGFMICBWJRZIBI-UHFFFAOYSA-N
Salix alba	GALACTOSE|D-GALACTOSE	WQZGKKKJIJFFOK-FPRJBGLDSA-N
Salix alba	XYLOSE	PYMYPHUHKUWMLA-WISUUJSJSA-N
Salix alba	L-ASCORBIC-ACID|ASCORBIC-ACID	TYQCGQRIZGCHNB-JLAZNSOCSA-N
Salix alba	ELEUTHEROSIDE-B-1|D-TERPINEOL|SYRINGIN|SYRINGOSIDE	QJVXKWHHAMZTBY-GCPOEHJPSA-N
Salix alba	PICEIN	GOZCEKPKECLKNO-RKQHYHRCSA-N
Salix alba	D-GLUCOSE|DEXTROSE|ALPHA-GLUCOSE|GLUCOSE	WQZGKKKJIJFFOK-DVKNGEFBSA-N
Viola arvensis	TOCOPHEROL|ALPHA-TOCOPHEROL|VITAMIN-E	GVJHHUAWPYXKBD-UHFFFAOYSA-N
Viola arvensis	TOCOPHEROL|ALPHA-TOCOPHEROL|VITAMIN-E	GVJHHUAWPYXKBD-IEOSBIPESA-N
Viola arvensis	ASCORBIC-ACID	TYQCGQRIZGCHNB-MVHIGOERSA-N
Viola arvensis	DELTA-TOCOPHEROL|TOCOPHEROL	GZIFEOYASATJEH-VHFRWLAGSA-N
Viola arvensis	TOCOPHEROL|ALPHA-TOCOPHEROL|VITAMIN-E	GVJHHUAWPYXKBD-IHMCZWCLSA-N
Viola arvensis	VIOLANTHIN|VIOLARVENSIN	MVOUGOXRXQDXDC-NMJPTQROSA-N
Viola arvensis	CHOLINE-SALICYLATE|SALICYLIC-ACID|O-HYDROXYBENZOIC-ACID	YGSDEFSMJLZEOE-UHFFFAOYSA-N
Viola arvensis	TOCOPHEROL|GAMMA-TOCOPHEROL	QUEDXNHFTDJVIY-DQCZWYHMSA-N
Viola arvensis	L-ASCORBIC-ACID|ASCORBIC-ACID	TYQCGQRIZGCHNB-JLAZNSOCSA-N
Fumaria officinalis	PARFUMINE	AHNUBWYOIHCGFN-FQEVSTJZSA-N
Fumaria officinalis	O-METHYLFUMAROPHYCINE	HTLXWDJBTOCUFB-PKTZIBPZSA-N
Fumaria officinalis	N-METHYLSINACTINE	MTDQIOGTAVVTIY-JTSKRJEESA-N
Fumaria officinalis	FUMAROPHYCINE	VIRGMCFNCOBYML-YADHBBJMSA-N
Fumaria officinalis	SINACTINE	UWEHVAXMSWXKRW-MRXNPFEDSA-N
Fumaria officinalis	(-)-SINACTINE	UWEHVAXMSWXKRW-INIZCTEOSA-N
Fumaria officinalis	STYLOPINE|(-)-TETRAHYDROCOPTISINE	UXYJCYXWJGAKQY-HNNXBMFYSA-N
Fumaria officinalis	FUMARIC-ACID|MALEIC-ACID	VZCYOOQTPOCHFL-OWOJBTEDSA-N
Fumaria officinalis	FUMARICINE	QDNMFIYGVRUVCE-LEWJYISDSA-N
Fumaria officinalis	CRYPTOPINE	XPOJSWHIKCNLEQ-UHFFFAOYSA-N
Fumaria officinalis	ADLUMIDICEINE	ZWRGIDKDYJXLHP-UHFFFAOYSA-N
Fumaria officinalis	SANGUINARINE	INVGWHRKADIJHF-UHFFFAOYSA-N
Fumaria officinalis	COPTISINE	XYHOBCMEDLZUMP-UHFFFAOYSA-N
Fumaria officinalis	BULBOCAPNINE	LODGIKWNLDQZBM-LBPRGKRZSA-N
Fumaria officinalis	ADLUMICEINE	UMFOKOZCSZKDLQ-UHFFFAOYSA-N
Fumaria officinalis	PALMATINE	QUCQEUCGKKTEBI-UHFFFAOYSA-N
Fumaria officinalis	FUMARITINE	YUIGSRGRYOBFRF-WOJBJXKFSA-N
Fumaria officinalis	LOLIOLIDE|LOLIOLID|(-)-LOLIOLIDE	XEVQXKKKAVVSMW-WRWORJQWSA-N
Fumaria officinalis	PROTOPINE	GPTFURBXHJWNHR-UHFFFAOYSA-N
Fumaria officinalis	FUMARILINE	GGQGUBWFVKJOER-FQEVSTJZSA-N
Robinia pseudoacacia	TRANS-FARNESOL|TRANS-TRANS-FARNESOL|FARNESOL	CRDAMVZIKSXKFV-YFVJMOTDSA-N
Robinia pseudoacacia	WATER	XLYOFNOQVPJJNP-UHFFFAOYSA-N
Robinia pseudoacacia	XYLOSE	SRBFZHDQGSBBOR-SQOUGZDYSA-N
Robinia pseudoacacia	(S)-(+)-ABSCISIC-ACID|ABSCISIC-ACID|(+)-ABSCISSIC-ACID	JLIDBLDQVAYHNE-YKALOCIXSA-N
Robinia pseudoacacia	ROBTEIN	NLAXFZHJXUCLDR-DAFODLJHSA-N
Robinia pseudoacacia	ELEUTHEROSIDE-B-1|SYRINGIN	QJVXKWHHAMZTBY-RBKUQZRRSA-N
Robinia pseudoacacia	TRANS-GERANIOL|GERANIOL|NEROL	GLZPCOQZEFWAFX-JXMROGBWSA-N
Robinia pseudoacacia	ALPHA-LINOLENIC-ACID|LINOLENIC-ACID	DTOSIQBPPRVQHS-PDBXOOCHSA-N
Robinia pseudoacacia	LINALOL|LINALOOL|(-)-LINALOOL	CDOSHBSSFJOMGT-UHFFFAOYSA-N
Robinia pseudoacacia	ROBINETINIDOL-(4BETA->2')-7,3',4',5'-TETRAHYDROXYFLAVONE	XTNZJKQIMOETMQ-NRSKXHDUSA-N
Robinia pseudoacacia	FUSTIN	FNUPUYFWZXZMIE-GJZGRUSLSA-N
Robinia pseudoacacia	DL-TERPINEOL|D-ALPHA-TERPINEOL|TERPINENOL|ALPHA-TERPINEOL|D-TERPINEOL|I-TERPINEOL|TERPINEOL	WUOACPNHFRMFPN-UHFFFAOYSA-N
Robinia pseudoacacia	RESOKAEMPFEROL	OBWHQJYOOCRPST-UHFFFAOYSA-N
Robinia pseudoacacia	ALPHA-LINOLEIC-ACID|LINOLEIC-ACID	OYHQOLUKZRVURQ-HZJYTTRNSA-N
Robinia pseudoacacia	XANTHONE	JNELGWHKGNBSMD-UHFFFAOYSA-N
Robinia pseudoacacia	BUTEIN	AYMYWHCQALZEGT-ORCRQEGFSA-N
Robinia pseudoacacia	LIQUIRITIGENIN	FURUXTVZLHCCNA-CQSZACIVSA-N
Robinia pseudoacacia	ROBINETINIDOL-(4ALPHA->2')-ROBINETINIDOL-4BETA-OL	JCTRYQPQWQYQGS-IROZXAIOSA-N
Robinia pseudoacacia	ELEUTHEROSIDE-B-1|BETA-TERPINEOL|SYRINGIN	QJVXKWHHAMZTBY-ONEGZZNKSA-N
Robinia pseudoacacia	CANAVANINE	FSBIGDSBMBYOPN-UHFFFAOYSA-N
Robinia pseudoacacia	KAEMPFEROL-3-ROBINOBIOSIDE	RTATXGUCZHCSNG-DKBMUQCHSA-N
Robinia pseudoacacia	KAEMPFEROL|TRIFOLITIN	IYRMWMYZSQPJKC-UHFFFAOYSA-N
Robinia pseudoacacia	TETRACOSANATE|LIGNOCERIC-ACID|TETRACOSANOIC-ACID	QZZGJDVWLFXDLK-UHFFFAOYSA-N
Robinia pseudoacacia	RAFFINOSE	MUPFEKGTMRGPLJ-ZQSKZDJDSA-N
Robinia pseudoacacia	OLEIC-ACID	ZQPPMHVWECSIRJ-KTKRTIGZSA-N
Robinia pseudoacacia	RHAMNOSE	SHZGCJCMOBCMKK-HGVZOGFYSA-N
Robinia pseudoacacia	CIS-TRANS-FARNESOL|FARNESOL	CRDAMVZIKSXKFV-PVMFERMNSA-N
Robinia pseudoacacia	D-XYLOSE|XYLOSE	PYMYPHUHKUWMLA-VPENINKCSA-N
Robinia pseudoacacia	KAEMPFEROL-3-GALACTOSIDE-7-RHAMNOSIDE	JYXSWDCPHRTYGU-HMZYCSBUSA-N
Robinia pseudoacacia	BENZALDEHYDE	HUMNYLRZRPPJDN-UHFFFAOYSA-N
Robinia pseudoacacia	L-RHAMNOSE|RHAMNOSE|FUCOSE	SHZGCJCMOBCMKK-JFNONXLTSA-N
Robinia pseudoacacia	ELEUTHEROSIDE-B-1|SYRINGIN	QJVXKWHHAMZTBY-KHJGIIJFSA-N
Robinia pseudoacacia	RAFFINOSE	MUPFEKGTMRGPLJ-QPRLJEHOSA-N
Robinia pseudoacacia	TAXIFOLIN|(+)-TAXIFOLIN|DIHYDROQUERCETIN	CXQWRCVTCMQVQX-LSDHHAIUSA-N
Robinia pseudoacacia	BENZYL-ALCOHOL	WVDDGKGOMKODPV-UHFFFAOYSA-N
Robinia pseudoacacia	TURGORIN	PCNPDUJUHNLVNS-YANYRWCTSA-N
Robinia pseudoacacia	PHYTOSTEROL|SITOSTEROL|GAMMA-SITOSTEROL|NIMBOSTEROL|BETA-SITOSTEROL|CLIONASTEROL	KZJWDPNRJALLNS-FBZNIEFRSA-N
Robinia pseudoacacia	LIQUIRITIGENIN	FURUXTVZLHCCNA-AWEZNQCLSA-N
Robinia pseudoacacia	ARACHIDIC-ACID	VKOBVWXKNCXXDE-UHFFFAOYSA-N
Robinia pseudoacacia	SYRINGIN	QJVXKWHHAMZTBY-NUUCXFROSA-N
Robinia pseudoacacia	D-ARABINOSE|ARABINOSE|XYLOSE|PENTOSE	PYMYPHUHKUWMLA-VAYJURFESA-N
Robinia pseudoacacia	LIQUIRITIGENIN	FURUXTVZLHCCNA-UHFFFAOYSA-N
Robinia pseudoacacia	BETA-GLUCOSE|D-GLUCOSE|DEXTROSE|GLUCOSE	WQZGKKKJIJFFOK-VFUOTHLCSA-N
Robinia pseudoacacia	ROBINETINIDOL-(4BETA->6)-DIHYDROROBINETIN	AQCVMGIJSRGXRR-KHFKTTBFSA-N
Robinia pseudoacacia	ROBINETINIDOL-(4ALPHA->2')-DIHYDROROBINETIN	ABQGXFBAMKSEEO-GVOYRISJSA-N
Robinia pseudoacacia	BUTIN	MJBPUQUGJNAPAZ-AWEZNQCLSA-N
Robinia pseudoacacia	3-HEXEN-1-OL|CIS-HEXEN-3-OL|(Z)-3-HEXENOL|CIS-3-HEXENOL|CIS-HEX-3-EN-1-OL|HEX-CIS-3-EN-1-OL|CIS-3-HEXEN-1-OL|CIS-3-HEXANOL|BETA-GAMMA-HEXENOL|(Z)-3-HEXEN-1-OL	UFLHIIWVXFIJGU-ARJAWSKDSA-N
Robinia pseudoacacia	ARABINOSE|XYLOSE	PYMYPHUHKUWMLA-UHFFFAOYSA-N
Robinia pseudoacacia	LINOLEIC-ACID	OYHQOLUKZRVURQ-IXWMQOLASA-N
Robinia pseudoacacia	ALPHA-HEXENAL|2-HEXENAL|HEXEN-(2)-AL-(1)|(E)-2-HEXENAL|TRANS-2-HEXENAL|TRANS-HEXEN-2-AL-1|HEXEN-2-AL|HEX-TRANS-2-EN-1-AL|ALPHA-BETA-HEXENAL	MBDOYVRWFFCFHM-SNAWJCMRSA-N
Robinia pseudoacacia	LINARIN	YFVGIJBUXMQFOF-SAXLCNSLSA-N
Robinia pseudoacacia	FISETIN	XHEFDIBZLJXQHF-UHFFFAOYSA-N
Robinia pseudoacacia	ROBINETINIDOL-(4ALPHA->8)-DIHYDROROBINETIN	SCTXZDULLAOYFG-JAIMTWQKSA-N
Robinia pseudoacacia	ROBINETINIDOL-(4BETA->6)-ROBINETINIDOL-4ALPHA-OL	GVBAISGMDHJZFT-QYWOBWDFSA-N
Robinia pseudoacacia	METHYL-ANTHRANILATE|ANTHRANILIC-ACID-METHYL-ESTER	VAMXMNNIEUEQDV-UHFFFAOYSA-N
Robinia pseudoacacia	L-ASPARAGINE|ASPARAGINE	DCXYFEDJOCDNAF-UHFFFAOYSA-N
Robinia pseudoacacia	ROBINETINIDOL-(4ALPOHA->2')-ROBINETIN	KGCPHQVZVPJIOY-DGYBNRFQSA-N
Robinia pseudoacacia	ROBINETIN	SOEDEYVDCDYMMH-UHFFFAOYSA-N
Robinia pseudoacacia	DIHYDROROBINETIN	VSJCDPYIMBSOKN-CABCVRRESA-N
Robinia pseudoacacia	ISOLIQUIRITIGENIN|2',4',4'-TRIHYDROXYCHALCONE	DXDRHHKMWQZJHT-FPYGCLRLSA-N
Robinia pseudoacacia	STACHYOSE	UQZIYBXSHAGNOE-USOSMYMVSA-N
Robinia pseudoacacia	HEXEN-3-OL|1-HEXEN-3-OL|HEX-1-EN-3-OL	BVOSSZSHBZQJOI-ZCFIWIBFSA-N
Robinia pseudoacacia	BETA-SITOSTEROL|GAMMA-SITOSTEROL	KZJWDPNRJALLNS-UHFFFAOYSA-N
Robinia pseudoacacia	BETA-SITOSTEROL	KZJWDPNRJALLNS-GDQWMHGZSA-N
Robinia pseudoacacia	INDICAN	XVARCVCWNFACQC-RKQHYHRCSA-N
Robinia pseudoacacia	FARNESOL	CRDAMVZIKSXKFV-FBXUGWQNSA-N
Robinia pseudoacacia	ROBINOBIOSE|RUTINOSE	OVVGHDNPYGTYIT-VHBGUFLRSA-N
Robinia pseudoacacia	PALMITIC-ACID|HEXADECANOIC-ACID	IPCSVZSSVZVIGE-UHFFFAOYSA-N
Robinia pseudoacacia	PHOSPHORUS	XYFCBTPGUUZFHI-UHFFFAOYSA-N
Robinia pseudoacacia	ELEUTHEROSIDE-B-1|D-TERPINEOL|SYRINGIN|SYRINGOSIDE	QJVXKWHHAMZTBY-GCPOEHJPSA-N
Robinia pseudoacacia	I-TERPINEOL|TERPINEOL|ALPHA-TERPINEOL	WUOACPNHFRMFPN-VIFPVBQESA-N
Robinia pseudoacacia	RAFFINOSE	MUPFEKGTMRGPLJ-RMMQSMQOSA-N
Robinia pseudoacacia	DEXTROSE|GLUCOSE	WQZGKKKJIJFFOK-GASJEMHNSA-N
Robinia pseudoacacia	AMYGDALIN	XUCIJNAGGSZNQT-JHSLDZJXSA-N
Robinia pseudoacacia	BEHENIC-ACID	UKMSUNONTOPOIO-UHFFFAOYSA-N
Robinia pseudoacacia	BIOQUERCETIN	JMGZEFIQIZZSBH-XQRUYOJJSA-N
Robinia pseudoacacia	BETA-RESORCYLIC-ACID|2,4-DIHYDROXYBENZOIC-ACID	UIAFKZKHHVMJGS-UHFFFAOYSA-N
Robinia pseudoacacia	ROBINETINIDOL	GMPPKSLKMRADRM-SWLSCSKDSA-N
Robinia pseudoacacia	INDOLE|INDOL	SIKJAQJRHWYJAI-UHFFFAOYSA-N
Robinia pseudoacacia	TAXIFOLIN	CXQWRCVTCMQVQX-YSSOQSIOSA-N
Robinia pseudoacacia	AMYGDALIN	XUCIJNAGGSZNQT-STIPWKKBSA-N
Robinia pseudoacacia	ROBINETINIDOL-4ALPHA-OL	OIDNVHGBTSUBEW-VHDGCEQUSA-N
Robinia pseudoacacia	APIGENIN-7-BIOSIDE	UGZKXZGXGFWBLZ-TUAZENJXSA-N
Robinia pseudoacacia	STACHYOSE	UQZIYBXSHAGNOE-XNSRJBNMSA-N
Robinia pseudoacacia	ALLANTOIC-ACID	NUCLJNSWZCHRKL-UHFFFAOYSA-N
Robinia pseudoacacia	ALLANTOIN	POJWUDADGALRAB-PVQJCKRUSA-N
Robinia pseudoacacia	DIHYDROROBINETIN	VSJCDPYIMBSOKN-GJZGRUSLSA-N
Robinia pseudoacacia	GALACTOSE|D-MANNOSE|MANNOSE|GLUCOSE	WQZGKKKJIJFFOK-QTVWNMPRSA-N
Robinia pseudoacacia	TAXIFOLIN	CXQWRCVTCMQVQX-UHFFFAOYSA-N
Robinia pseudoacacia	BETA-CAROTENE|PROVITAMIN-A|CAROTENE	OENHQHLEOONYIE-JLTXGRSLSA-N
Robinia pseudoacacia	LINARIN|ACACIIN	YFVGIJBUXMQFOF-PJOVQGMDSA-N
Robinia pseudoacacia	ALPHA-CAROTENE|CAROTENE	ANVAOWXLWRTKGA-JLTXGRSLSA-N
Robinia pseudoacacia	I-TERPINEOL|TERPINEOL|ALPHA-TERPINEOL	WUOACPNHFRMFPN-SECBINFHSA-N
Robinia pseudoacacia	ROBINETINIDOL-(4ALPHA->2')-ROBINETINIDOL-4ALPHA-OL	JCTRYQPQWQYQGS-ZHKWTLIXSA-N
Robinia pseudoacacia	HELIOTROPINE|PIPERONAL|HELIOTROPIN	SATCULPHIDQDRE-UHFFFAOYSA-N
Robinia pseudoacacia	ACACETIN-7-RUTINOSIDE|LINARIN	YFVGIJBUXMQFOF-OFSFZXSLSA-N
Robinia pseudoacacia	XYLOSE	PYMYPHUHKUWMLA-WISUUJSJSA-N
Robinia pseudoacacia	(2R,3R)-FUSTIN	FNUPUYFWZXZMIE-LSDHHAIUSA-N
Robinia pseudoacacia	APIGENIN-4'-METHYL-ETHER|ACACETIN	DANYIYRPLHHOCZ-UHFFFAOYSA-N
Robinia pseudoacacia	STEARIC-ACID	QIQXTHQIDYTFRH-UHFFFAOYSA-N
Robinia pseudoacacia	PHYTOSTEROL|SITOSTEROL|GAMMA-SITOSTEROL|NIMBOSTEROL|BETA-SITOSTEROL|SITOSTEROL-6'-LINOLYLGLUCOSIDE|(-)-BETA-SITOSTEROL	KZJWDPNRJALLNS-VJSFXXLFSA-N
Robinia pseudoacacia	L-ASPARAGINE|ASPARAGINE	DCXYFEDJOCDNAF-REOHCLBHSA-N
Robinia pseudoacacia	CANAVANINE	FSBIGDSBMBYOPN-VKHMYHEASA-N
Robinia pseudoacacia	RAFFINOSE	MUPFEKGTMRGPLJ-UHFFFAOYSA-N
Robinia pseudoacacia	GERANIOL|NEROL	GLZPCOQZEFWAFX-YFHOEESVSA-N
Robinia pseudoacacia	ROBININ	PEFASEPMJYRQBW-XMWKPCQISA-N
Robinia pseudoacacia	ASPARAGINE	DCXYFEDJOCDNAF-UWTATZPHSA-N
Robinia pseudoacacia	D-GLUCOSE|DEXTROSE|ALPHA-GLUCOSE|GLUCOSE	WQZGKKKJIJFFOK-DVKNGEFBSA-N
Robinia pseudoacacia	ROBINOSIDE|ROBININ	PEFASEPMJYRQBW-HKWQTAEVSA-N
Robinia pseudoacacia	CIS-TRANS-FARNESOL|FARNESOL	CRDAMVZIKSXKFV-GNESMGCMSA-N
Hamamelis virginiana	QUINIC-ACID|(-)-QUINIC-ACID	AAWZDTNXLSGCEK-UHFFFAOYSA-N
Hamamelis virginiana	KAEMPFEROL|TRIFOLITIN	IYRMWMYZSQPJKC-UHFFFAOYSA-N
Hamamelis virginiana	MYRECITIN-GLUCOSIDE|MYRICETIN-3-GLUCOSIDE	FOHXFLPXBUAOJM-ICSFOJPJSA-N
Hamamelis virginiana	QUERCETRIN|QUERCETIN-3-RHAMNOSIDE|QUERCETIN-3-O-RHAMNOSIDE|QUERCITRIN	OXGUCUVFOIWWQJ-XIMSSLRFSA-N
Hamamelis virginiana	LEUCOCYANIDIN	SBZWTSHAFILOTE-RBSFLKMASA-N
Hamamelis virginiana	AFZELIN|KAEMPFEROL-3-O-ALPHA-RHAMNOSIDE|KAEMPFERIN|KAEMPFEROL-3-O-ALPHA-L-RHAMNOSIDE|KAEMPFEROL-3-RHAMNOSIDE|KAEMPFEROL-3-O-RHAMNOSIDE	SOSLMHZOJATCCP-AEIZVZFYSA-N
Hamamelis virginiana	ASRAGALIN|KAEMPFEROL-3-O-BETA-D-GLUCOSIDE|KAEMPFEROL-3-O-GLUCOSIDE|ASTRAGALIN|KAEMPFEROL-3-0-GLUCOSIDE	JPUKWEQWGBDDQB-QSOFNFLRSA-N
Hamamelis virginiana	AFZELIN	SOSLMHZOJATCCP-PADPQNGGSA-N
Hamamelis virginiana	(-)-EPICATECHIN-GALLATE|(-)-EPICATECHOL-GALLATE|EPICATECHIN-3-O-GALLATE|EPICATECHIN-GALLATE|EPICATECHIN-3-GALLATE|(-)-EPICATECHIN-3-O-GALLATE|(-)-EPICATECHIN-3-GALLATE	LSHVYAFMTMFKBA-TZIWHRDSSA-N
Hamamelis virginiana	LEUCODELPHINIDIN	ZEACOKJOQLAYTD-ILXRZTDVSA-N
Hamamelis virginiana	CHINIC-ACID|QUINIC-ACID|(-)-QUINIC-ACID	AAWZDTNXLSGCEK-LNVDRNJUSA-N
Hamamelis virginiana	QUINIC-ACID	AAWZDTNXLSGCEK-WRLPILLBSA-N
Hamamelis virginiana	IONONE|IONENE|BETA-IONONE	PSQYTAPXSHCGMF-BQYQJAHWSA-N
Hamamelis virginiana	HAMAMELITANNIN	FEPAFOYQTIEEIS-IZUGRSKYSA-N
Hamamelis virginiana	QUERCETIN|QUERCETOL	REFJWTPEDVJJIY-UHFFFAOYSA-N
Hamamelis virginiana	L-EPICATECHIN|EPICATECHOL|(-)-EPICATECHOL	PFTAWBLQPZVEMU-AFYYWNPRSA-N
Hamamelis virginiana	QUINIC-ACID	AAWZDTNXLSGCEK-FZTZQNQQSA-N
Hamamelis virginiana	ALPHA-IONONE|IONONE	UZFLPKAIBPNNCA-BQYQJAHWSA-N
Hamamelis virginiana	GALLIC-ACID	LNTHITQWFMADLM-UHFFFAOYSA-N
Hamamelis virginiana	MYRECITIN-GLUCOSIDE|MYRICETIN-3-GLUCOSIDE	ZJYAVUPWMNHHEU-GFOOFYSOSA-N
Hamamelis virginiana	QUERCETIN-3-O-GLUCOSIDE|TRIFOLIIN|HIRSUTRIN|ISOQUERCETIN|ISOQUERCITRIN|QUERCETOL-3-GLUCOSIDE|QUERCETIN-3-BETA-D-GLUCOSIDE|QUERCETIN-3-O-BETA-D-GLUCOSIDE|QUERCETIN-3-O-BETA-D-GLUCOPYRANOSIDE	OVSQVDMCBVZWGM-QSOFNFLRSA-N
Hamamelis virginiana	SAFROLE	ZMQAAUBTXCXRIC-UHFFFAOYSA-N
Hamamelis virginiana	QUERCETRIN|QUERCETIN-3-O-RHAMNOSIDE|QUERCITRIN	OXGUCUVFOIWWQJ-KNPIPFGMSA-N
Hamamelis virginiana	GALLO-TANNIN	RNKMOGIPOMVCHO-UHFFFAOYSA-N
Hamamelis virginiana	EPI-GALLOCATECHIN-3-O-GALLATE|(-)-EPIGALLOCATECHIN-GALLATE|EPIGALLOCATECHIN-GALLATE|EPIGALLOCATECHIN-3-GALLATE|EPIGALLOCATECHOL-GALLATE|(-)-EPIGALLOCATECHIN-3-GALLATE|EPIGALLOCATECHIN-3-O-GALLATE|(-)-EPIGALLOCATECHIN-3-O-GALLATE|(-)-EPIGALLOCATECHOL-GALLATE	WMBWREPUVVBILR-WIYYLYMNSA-N
Hamamelis virginiana	GALLO-TANNIN	CNRQHAUMAXVSFM-YRWSZHEOSA-N
Hamamelis virginiana	SPIRAEOSIDE	OIUBYZLTFSLSBY-HMGRVEAOSA-N
Hamamelis virginiana	PHENOL	ISWSIDIOOBJBQZ-UHFFFAOYSA-N
Hamamelis virginiana	GALLO-TANNIN	RNKMOGIPOMVCHO-SJMVAQJGSA-N
Hamamelis virginiana	EPIGALLOCATECHOL|L-EPIGALLOCATECHIN|GALLOCATECHOL|(-)-EPIGALLOCATECHIN|(-)-EPI-GALLO-CATECHOL|EPIGALLOCATECHIN	XMOCLSLCDHWDHP-IUODEOHRSA-N
Hamamelis virginiana	HAMAMELITANNIN	FEPAFOYQTIEEIS-UHFFFAOYSA-N
Hamamelis virginiana	ACETALDEHYDE	IKHGUXGNUITLKF-UHFFFAOYSA-N
Hamamelis virginiana	MYRICETIN	IKMDFBPHZNJCSN-UHFFFAOYSA-N
Hamamelis virginiana	HYPERIN|QUERCETIN-3-O-GALACTOSIDE|ISOQUERCITRIN|HYPEROSIDE	OVSQVDMCBVZWGM-UHFFFAOYSA-N
Hamamelis virginiana	CHOLINE	OIPILFWXSMYKGL-UHFFFAOYSA-N
Hamamelis virginiana	HAMAMELOSE	ZGVNGXVNRCEBDS-HSUXUTPPSA-N
Hamamelis virginiana	LEUCODELPHINIDIN	ZEACOKJOQLAYTD-UHFFFAOYSA-N
Hamamelis virginiana	CATECHIN-3-GALLATE	GNXIIYFUGQWDJG-LAUBAEHRSA-N
Hamamelis virginiana	LEUCOCYANIDIN	SBZWTSHAFILOTE-QLFBSQMISA-N
Hamamelis virginiana	LEUCOCYANIDIN	SBZWTSHAFILOTE-KKUMJFAQSA-N
Hamamelis virginiana	BURSINE|CHOLINE	OEYIOHPDSNJKLS-UHFFFAOYSA-N
Hamamelis virginiana	CATECHIN-3-GALLATE	LSHVYAFMTMFKBA-CTNGQTDRSA-N
Hamamelis virginiana	LEUCOCYANIDIN	SBZWTSHAFILOTE-UHFFFAOYSA-N
Hamamelis virginiana	QUINIC-ACID|(-)-QUINIC-ACID	AAWZDTNXLSGCEK-VNDMDPINSA-N
Hamamelis virginiana	QUERCETIN-3-O-GLUCOSIDE|ISOQUERCITRIN|TRIFOLIIN	OVSQVDMCBVZWGM-ZVIPYZFUSA-N
Hamamelis virginiana	QUERCETRIN|QUERCETIN-3-RHAMNOSIDE|QUERCETIN-3-O-RHAMNOSIDE|QUERCITRIN	OXGUCUVFOIWWQJ-HQBVPOQASA-N
Hamamelis virginiana	HAMAMELOSE	LPZIZDWZKIXVRZ-MOJAZDJTSA-N
Hamamelis virginiana	QUINIC-ACID|(-)-QUINIC-ACID	AAWZDTNXLSGCEK-ZHQZDSKASA-N
Hamamelis virginiana	LEUCOCYANIDIN|LEUCOANTHOCYANIDOLE	SBZWTSHAFILOTE-SOUVJXGZSA-N
Oenothera biennis	ASPARTIC-ACID	CKLJMWTZIZZHCS-UHFFFAOYSA-N
Oenothera biennis	BORON	UORVGPXVDQYIDP-UHFFFAOYSA-N
Oenothera biennis	ALANINE	QNAYBMKLOCPYGJ-UWTATZPHSA-N
Oenothera biennis	WATER	XLYOFNOQVPJJNP-UHFFFAOYSA-N
Oenothera biennis	L-ASPARTIC-ACID|ASPARTIC-ACID|ASPARAGIC-ACID|ASPARAGINIC-ACID	CKLJMWTZIZZHCS-REOHCLBHSA-N
Oenothera biennis	BETA-AMYRIN	JFSHUTJDVKUMTJ-KOMNAURRSA-N
Oenothera biennis	ISOLEUCINE	AGPKZVBTJJNPAG-UHFFFAOYSA-N
Oenothera biennis	LUPEOL	MQYXUWHLBZFQQO-UHFFFAOYSA-N
Oenothera biennis	LINOLEIC-ACID	OYHQOLUKZRVURQ-IXWMQOLASA-N
Oenothera biennis	GAMOLENIC-ACID|GAMMA-LINOLENIC-ACID|CIS-GAMMA-LINOLENIC-ACID	VZCCETWTMQHEPK-QNEBEIHSSA-N
Oenothera biennis	GALLIC-ACID	LNTHITQWFMADLM-UHFFFAOYSA-N
Oenothera biennis	BETA-AMYRIN	JFSHUTJDVKUMTJ-XCIKXOPNSA-N
Oenothera biennis	O-VANILLIC-ACID	AUZQQIPZESHNMG-UHFFFAOYSA-N
Oenothera biennis	P-HYDROXYPHENYLACETIC-ACID	XQXPVVBIMDBYFF-UHFFFAOYSA-N
Oenothera biennis	STIGMASTEROL	HCXVJBMSMIARIN-HJWRWDBZSA-N
Oenothera biennis	IRON-OXIDE|IRON	XEEYBQQBJWHFJM-UHFFFAOYSA-N
Oenothera biennis	THREONINE	AYFVYJQAPQTCCC-UHFFFAOYSA-N
Oenothera biennis	ASPARTIC-ACID	CKLJMWTZIZZHCS-UWTATZPHSA-N
Oenothera biennis	ALPHA-LINOLEIC-ACID|LINOLEIC-ACID	OYHQOLUKZRVURQ-HZJYTTRNSA-N
Oenothera biennis	GAMMA-TOCOPHEROL	QUEDXNHFTDJVIY-WENCSYSZSA-N
Oenothera biennis	DELPHINIDIN	JKHRCGUTYDNCLE-UHFFFAOYSA-O
Oenothera biennis	SYRINGIC-ACID	JMSVCTWVEWCHDZ-UHFFFAOYSA-N
Oenothera biennis	SERINE	MTCFGRXMJLQNBG-REOHCLBHSA-N
Oenothera biennis	TYROSINE	JZKXXXDKRQWDET-UHFFFAOYSA-N
Oenothera biennis	METHIONINE	FFEARJCKVFRZRR-UHFFFAOYSA-N
Oenothera biennis	TYROSINE	OUYCCCASQSFEME-UHFFFAOYSA-N
Oenothera biennis	CAMPESTEROL	SGNBVLSWZMBQTH-PODYLUTMSA-N
Oenothera biennis	CYCLOARTENOL	ONQRKEUAIJMULO-IAWHQMGRSA-N
Oenothera biennis	ALPHA-AMYRIN	FSLPMRQHCOLESF-UHFFFAOYSA-N
Oenothera biennis	AMYRIN|BETA-AMYRIN	JFSHUTJDVKUMTJ-QHPUVITPSA-N
Oenothera biennis	ALANINE|BETA-ALANINE	UCMIRNVEIXFBKS-UHFFFAOYSA-N
Oenothera biennis	CYCLOARTENOL	ONQRKEUAIJMULO-UHFFFAOYSA-N
Oenothera biennis	KAEMPFEROL|TRIFOLITIN	IYRMWMYZSQPJKC-UHFFFAOYSA-N
Oenothera biennis	ISOLEUCINE	AGPKZVBTJJNPAG-UHNVWZDZSA-N
Oenothera biennis	PALMITIC-ACID|HEXADECANOIC-ACID	IPCSVZSSVZVIGE-UHFFFAOYSA-N
Oenothera biennis	OLEIC-ACID	ZQPPMHVWECSIRJ-KTKRTIGZSA-N
Oenothera biennis	ERUCIC-ACID	DPUOLQHDNGRHBS-KTKRTIGZSA-N
Oenothera biennis	CYSTINE	YTPQSLLEROSACP-UHFFFAOYSA-N
Oenothera biennis	AMMONIA(NH3)|AMMONIA	QGZKDVFQNNGYKY-BJUDXGSMSA-N
Oenothera biennis	OENOTHEIN-A|OENOTHERIN	BJKKYEKHHYWTQZ-UHFFFAOYSA-N
Oenothera biennis	DIGALLIC-ACID	COVFEVWNJUOYRL-UHFFFAOYSA-N
Oenothera biennis	TRYPTOPHAN|L-(-)-TRYPTOPHAN	QIVBCDIJIAJPQS-SECBINFHSA-N
Oenothera biennis	EPSILOM-TARAXASTEROL|TARAXASTEROL	XWMMEBCFHUKHEX-ZJJHUPNDSA-N
Oenothera biennis	TRYPTOPHAN|L-TRYPTOPHAN|L-(-)-TRYPTOPHAN	QIVBCDIJIAJPQS-VIFPVBQESA-N
Oenothera biennis	CAFFEIC-ACID|TRANS-CAFFEIC-ACID|DIHYDROXYCINNAMIC-ACID|3,4-DIHYDROXYCINNAMIC-ACID	QAIPRVGONGVQAS-DUXPYHPUSA-N
Oenothera biennis	GAMMA-RESORCYLIC-ACID	AKEUNCKRJATALU-UHFFFAOYSA-N
Oenothera biennis	GLUTAMIC-ACID	WHUUTDBJXJRKMK-UHFFFAOYSA-N
Oenothera biennis	STIGMASTEROL	HCXVJBMSMIARIN-PHZDYDNGSA-N
Oenothera biennis	CYSTINE-(HALF)|CYSTEINE|CYSTINE|L-CYSTEINE	XUJNEKJLAYXESH-REOHCLBHSA-N
Oenothera biennis	CIS-LINOLEIC-ACID	LEIXEEFBKOMCEQ-AFJQJTPPSA-N
Oenothera biennis	SERINE	MTCFGRXMJLQNBG-UHFFFAOYSA-N
Oenothera biennis	NEO-CHLOROGENIC-ACID|NEOCLOROGENIC-ACID|NEOCHLOROGENIC-ACID	CWVRJTMFETXNAD-NXLLHMKUSA-N
Oenothera biennis	VALINE	KZSNJWFQEVHDMF-BYPYZUCNSA-N
Oenothera biennis	PSEUDOTARAXASTEROL|TARAXASTEROL	NGFFRJBGMSPDMS-MHFMPXFTSA-N
Oenothera biennis	L-ARGININE|ARGININE	ODKSFYDXXFIFQN-BYPYZUCNSA-N
Oenothera biennis	PHYTOSTEROL|SITOSTEROL|GAMMA-SITOSTEROL|NIMBOSTEROL|BETA-SITOSTEROL|CLIONASTEROL	KZJWDPNRJALLNS-FBZNIEFRSA-N
Oenothera biennis	OBTUSIFOLIOL	MMNYKQIDRZNIKT-VSADUBDNSA-N
Oenothera biennis	STIGMASTEROL	HCXVJBMSMIARIN-KEJCWXRGSA-N
Oenothera biennis	CHOLINE-SALICYLATE|SALICYLIC-ACID|O-HYDROXYBENZOIC-ACID	YGSDEFSMJLZEOE-UHFFFAOYSA-N
Oenothera biennis	GAMMA-LINOLENIC-ACID	VZCCETWTMQHEPK-YHTMAJSVSA-N
Oenothera biennis	CYSTINE	LEVWYRKDKASIDU-IMJSIDKUSA-N
Oenothera biennis	ELLAGIC-ACID	AFSDNFLWKVMVRB-UHFFFAOYSA-N
Oenothera biennis	EPSILOM-TARAXASTEROL|TARAXASTEROL	XWMMEBCFHUKHEX-VPUBHQHASA-N
Oenothera biennis	MAGNESIUM	RSHAOIXHUHAZPM-UHFFFAOYSA-N
Oenothera biennis	STIGMASTEROL	HCXVJBMSMIARIN-BGDBIVFESA-N
Oenothera biennis	ALPHA-ALANINE|ALANINE|L-ALANINE	QNAYBMKLOCPYGJ-UHFFFAOYSA-N
Oenothera biennis	2-HYDROXY-4-METHOXYBENZOIC-ACID	MRIXVKKOHPQOFK-UHFFFAOYSA-N
Oenothera biennis	COPPER	RYGMFSIKBFXOCR-UHFFFAOYSA-N
Oenothera biennis	LYSINE|L-(+)-LYSINE	KDXKERNSBIXSRK-RXMQYKEDSA-N
Oenothera biennis	ISOLEUCINE	AGPKZVBTJJNPAG-WHFBIAKZSA-N
Oenothera biennis	LEUCINE	ROHFNLRQFUQHCH-YFKPBYRVSA-N
Oenothera biennis	TOCOPHEROL|GAMMA-TOCOPHEROL	QUEDXNHFTDJVIY-DQCZWYHMSA-N
Oenothera biennis	LYSINE|L-(+)-LYSINE|L-LYSINE	KDXKERNSBIXSRK-YFKPBYRVSA-N
Oenothera biennis	P-COUMARIC-ACID|4-HYDROXYCINNAMIC-ACID|P-COUMARINIC-ACID|TRANS-P-COUMARIC-ACID|P-HYDROXYCINNAMIC-ACID	NGSWKAQJJWESNS-ZZXKWVIFSA-N
Oenothera biennis	TOCOPHEROL|ALPHA-TOCOPHEROL|VITAMIN-E	GVJHHUAWPYXKBD-IEOSBIPESA-N
Oenothera biennis	TOCOPHEROL|ALPHA-TOCOPHEROL|VITAMIN-E	GVJHHUAWPYXKBD-IHMCZWCLSA-N
Oenothera biennis	METHYLENE-CYCLOARTENOL	BDHQMRXFDYJGII-SETWXFLESA-N
Oenothera biennis	ALPHA-LINOLENIC-ACID|LINOLENIC-ACID	DTOSIQBPPRVQHS-PDBXOOCHSA-N
Oenothera biennis	TARAXASTEROL	XWMMEBCFHUKHEX-CWFQSGEHSA-N
Oenothera biennis	PROLINE|PYRROLIDINE-CARBOXYLIC-ACID	ONIBWKKTOPOVIA-UHFFFAOYSA-N
Oenothera biennis	PALMITOLEIC-ACID|(Z)-PALMITOLEIC-ACID	SECPZKHBENQXJG-FPLPWBNLSA-N
Oenothera biennis	OENOTHEIN-B	MGFJAOIDAUFIHI-AQTHVLBGSA-N
Oenothera biennis	CYSTINE	LEVWYRKDKASIDU-UHFFFAOYSA-N
Oenothera biennis	GLYCINE|GLYCOCOLL	DHMQDGOQFOQNFH-UHFFFAOYSA-N
Oenothera biennis	CYCLOARTENOL	ONQRKEUAIJMULO-XCNBMAHYSA-N
Oenothera biennis	GRAMISTEROL|24-METHYLENE-LOPHENOL	RSMKYRDCCSNYFM-AAGDOFLISA-N
Oenothera biennis	BETA-SITOSTEROL|GAMMA-SITOSTEROL	KZJWDPNRJALLNS-UHFFFAOYSA-N
Oenothera biennis	PROTOCATECHUIC-ACID|3,4-DIHYDROXYBENZOIC-ACID|O-PROTOCATECHUIC-ACID	YQUVCSBJEUQKSH-UHFFFAOYSA-N
Oenothera biennis	BETA-SITOSTEROL	KZJWDPNRJALLNS-GDQWMHGZSA-N
Oenothera biennis	CITROSTADIENOL|CITROSTADIENIOL	LPZCCMIISIBREI-VMZJTLAQSA-N
Oenothera biennis	ALPHA-ALANINE|ALANINE|L-ALANINE	QNAYBMKLOCPYGJ-REOHCLBHSA-N
Oenothera biennis	EPSILOM-TARAXASTEROL|TARAXASTEROL	XWMMEBCFHUKHEX-UHFFFAOYSA-N
Oenothera biennis	AMYRIN|ALPHA-AMYRIN	FSLPMRQHCOLESF-SFMCKYFRSA-N
Oenothera biennis	TETRADECENOIC-ACID|MYRISTIC-ACID|TETRADECANOIC-ACID	TUNFSRHWOTWDNC-UHFFFAOYSA-N
Oenothera biennis	HISTIDINE	HNDVDQJCIGZPNO-UHFFFAOYSA-N
Oenothera biennis	PHOSPHORUS	XYFCBTPGUUZFHI-UHFFFAOYSA-N
Oenothera biennis	CYCLOARTENOL	ONQRKEUAIJMULO-YBXTVTTCSA-N
Oenothera biennis	POTASSIUM|POTASSIUM-OXIDE|POTASSIUM-CHLORIDE|K2O	NTTOTNSKUYCDAV-UHFFFAOYSA-N
Oenothera biennis	4-HYDROXYBENZOIC-ACID|P-HYDROXY-BENZOIC-ACID|P-HYDROXYBENZOIC-ACID|4-HYDROXY-BENZOIC-ACID	FJKROLUGYXJWQN-UHFFFAOYSA-N
Oenothera biennis	AMMONIA(NH3)|AMMONIA|NH3	QGZKDVFQNNGYKY-UHFFFAOYSA-N
Oenothera biennis	STARCH	YJISHJVIRFPGGN-UHFFFAOYSA-N
Oenothera biennis	L-ORNITHINE|ORNITHINE	AHLPHDHHMVZTML-BYPYZUCNSA-N
Oenothera biennis	ALPHA-TOCOPHEROL|VITAMIN-E	GVJHHUAWPYXKBD-SYZUXVNWSA-N
Oenothera biennis	GENTISINIC-ACID|2,5-DIHYDROXYBENZOIC-ACID|GENTISIC-ACID	WXTMDXOMEHJXQO-UHFFFAOYSA-N
Oenothera biennis	MANGANESE	PWHULOQIROXLJO-UHFFFAOYSA-N
Oenothera biennis	DELTA-TOCOPHEROL|TOCOPHEROL	GZIFEOYASATJEH-VHFRWLAGSA-N
Oenothera biennis	ZINC	HCHKCACWOHOZIP-UHFFFAOYSA-N
Oenothera biennis	TYROSINE	WRFPVMFCRNYQNR-UHFFFAOYSA-N
Oenothera biennis	TYROSINE	OUYCCCASQSFEME-MRVPVSSYSA-N
Oenothera biennis	PHENYLALANINE	COLNVLDHVKWLRT-QMMMGPOBSA-N
Oenothera biennis	LYSINE|L-(+)-LYSINE	KDXKERNSBIXSRK-UHFFFAOYSA-N
Oenothera biennis	PALMITOLEIC-ACID	SECPZKHBENQXJG-BQYQJAHWSA-N
Oenothera biennis	ERUCIC-ACID	DPUOLQHDNGRHBS-MDZDMXLPSA-N
Oenothera biennis	SERINE	MTCFGRXMJLQNBG-UWTATZPHSA-N
Oenothera biennis	FERULIC-ACID|TRANS-FERULIC-ACID	KSEBMYQBYZTDHS-HWKANZROSA-N
Oenothera biennis	ALPHA-LINOLENIC-ACID|DELTA-9,12,15-OCTADECATRIENIC-ACID	DTOSIQBPPRVQHS-IUQGRGSQSA-N
Oenothera biennis	TARAXASTEROL|PSI-TARAXASTEROL	NGFFRJBGMSPDMS-VPUBHQHASA-N
Oenothera biennis	L-HISTIDINE|HISTIDINE	HNDVDQJCIGZPNO-YFKPBYRVSA-N
Oenothera biennis	BETA-AMYRIN	JFSHUTJDVKUMTJ-QKAPCWNWSA-N
Oenothera biennis	OBTUSIFOLIOL	MMNYKQIDRZNIKT-JRXZUNMASA-N
Oenothera biennis	QUERCETIN|QUERCETOL	REFJWTPEDVJJIY-UHFFFAOYSA-N
Oenothera biennis	TOCOPHEROL|ALPHA-TOCOPHEROL|VITAMIN-E	GVJHHUAWPYXKBD-UHFFFAOYSA-N
Oenothera biennis	LUPEOL	MQYXUWHLBZFQQO-JGGBMTAGSA-N
Oenothera biennis	THREONINE	AYFVYJQAPQTCCC-GBXIJSLDSA-N
Oenothera biennis	ALPHA-TOCOPHEROL|VITAMIN-E|VIT-E	GVJHHUAWPYXKBD-QLVXXPONSA-N
Oenothera biennis	O-COUMARIC-ACID	PMOWTIHVNWZYFI-AATRIKPKSA-N
Oenothera biennis	PHENYLALANINE	COLNVLDHVKWLRT-MRVPVSSYSA-N
Oenothera biennis	LUPENOL|LUPEOL	MQYXUWHLBZFQQO-QGTGJCAVSA-N
Oenothera biennis	DIHOMO-LINOLENIC-ACID	AHANXAKGNAKFSK-PDBXOOCHSA-N
Oenothera biennis	TRYPTOPHAN|L-(-)-TRYPTOPHAN	QIVBCDIJIAJPQS-UHFFFAOYSA-N
Oenothera biennis	PROLINE|PYRROLIDINE-CARBOXYLIC-ACID	ONIBWKKTOPOVIA-BYPYZUCNSA-N
Oenothera biennis	PHENYLALANINE	COLNVLDHVKWLRT-UHFFFAOYSA-N
Oenothera biennis	CAMPESTEROL	SGNBVLSWZMBQTH-ZRUUVFCLSA-N
Oenothera biennis	L-METHIONINE|METHIONINE	FFEARJCKVFRZRR-BYPYZUCNSA-N
Oenothera biennis	PYROCATECHUIC-ACID	GLDQAMYCGOIJDV-UHFFFAOYSA-N
Oenothera biennis	GLUTAMIC-ACID	WHUUTDBJXJRKMK-GSVOUGTGSA-N
Oenothera biennis	PROLINE	ONIBWKKTOPOVIA-SCSAIBSYSA-N
Oenothera biennis	STEARIC-ACID	QIQXTHQIDYTFRH-UHFFFAOYSA-N
Oenothera biennis	BETA-AMYRIN	JFSHUTJDVKUMTJ-UHFFFAOYSA-N
Oenothera biennis	PHYTOSTEROL|SITOSTEROL|GAMMA-SITOSTEROL|NIMBOSTEROL|BETA-SITOSTEROL|SITOSTEROL-6'-LINOLYLGLUCOSIDE|(-)-BETA-SITOSTEROL	KZJWDPNRJALLNS-VJSFXXLFSA-N
Oenothera biennis	TYROSINE	OUYCCCASQSFEME-QMMMGPOBSA-N
Oenothera biennis	CAMPESTEROL	SGNBVLSWZMBQTH-UHFFFAOYSA-N
Oenothera biennis	GLUTAMIC-ACID|L-GLUTAMIC-ACID	WHUUTDBJXJRKMK-VKHMYHEASA-N
Trifolium pratense	6-ALPHA-HYDROXYMAACKIAIN|(+)-6A-HYDROXYMAACKIAIN	GLMPLZUBQDAZEN-CVEARBPZSA-N
Trifolium pratense	BORON	UORVGPXVDQYIDP-UHFFFAOYSA-N
[truncated: 31,995 more rows]

## Sheet: DB protein-diseases
Protein_Family	Uniprot_ID	Protein_Name	Diseases
Enzyme	P09601	heme oxygenase	atherosclerosis
GPCR	P25116	proteinase-activated like receptor type 1	embolism and thrombosis of unspecified vein
Ion Channel	P02708	nicotinic acetylcholine	cardiovascular disease, unspecified
GPCR	P18825	adrenoceptor type 2c	essential (primary) hypertension;acute ischaemic heart disease, unspecified
Enzyme	P03952	plasma kallikrein	coagulation
Enzyme	P00488	protein-glutamine gamma-glutamyltransferase	other forms of acute ischaemic heart disease;atherosclerosis;embolism and thrombosis of unspecified vein
Enzyme	Q13464	rho-associated protein kinase 1	essential (primary) hypertension;cardiovascular disease, unspecified
Nuclear Receptor	Q03181	peroxisome proliferator activated beta	atherosclerosis
Enzyme	P55263	adenosine kinase	acute ischaemic heart disease, unspecified
Ion Channel	P22460	shaker voltage-gated k+ channel type kv1.5	cardiac dysrhythmias
Enzyme	Q8WZ42	titin	cardiovascular disease, unspecified
Enzyme	Q99683	apoptosis signal regulating kinase 1 (map3k5)	essential (primary) hypertension
Enzyme	O75061	protein-tyrosine-phosphatase	essential (primary) hypertension
Cytochrome	P11509	cyp-2a6	heart failure
Enzyme	Q13043	mammalian sterile 20 like 1	acute myocardial infarction, unspecified
Ion Channel	Q92581	sodium/potassium/calcium exchanger	essential (primary) hypertension
Enzyme	Q8NHS2	aspartate transaminase	acute ischaemic heart disease, unspecified
Ion Channel	Q96RP8	voltage-gated k+ channel type kv7.1	other cardiac arrhythmias
Enzyme	P00740	coagulation factor ixa	stroke, not specified as haemorrhage or infarction
Enzyme	P10619	carboxypeptidase c	renovascular hypertension
Cytochrome	P05177	cyp-1a2	acute myocardial infarction, unspecified;heart failure;coronary heart disease
GPCR	Q8WXD0	lgr8	heart failure
Enzyme	P30419	glycylpeptide n-tetradecanoyltransferase	silent myocardial ischaemia
GPCR	P43115	prostaglandin e receptor type 3	acute myocardial infarction
Enzyme	P25098	beta-adrenergic receptor kinase 1	essential (primary) hypertension
Enzyme	P35610	sterol o-acyltransferase	atherosclerosis
Enzyme	P13497	procollagen c proteinase	other complications of cardiac and vascular prosthetic devices, implants and grafts
Enzyme	P07858	cathepsin b	acute ischaemic heart disease, unspecified
Ion Channel	Q9Y6J6	voltage-gated k+ channel, kcne2 (mink related peptide 1)	other cardiac arrhythmias
GPCR	P35348	adrenoceptor type 1a	essential (primary) hypertension
Enzyme	P12915	picornain 2a	dilated cardiomyopathy
Enzyme	Q16647	prostaglandin-i synthase	cardiovascular prevention
Enzyme	P34913	epoxide hydrolase	essential (primary) hypertension;stroke, not specified as haemorrhage or infarction
Enzyme	P00749	u-plasminogen activator	exposure to high and low air pressure and changes in air pressure;heart failure
Enzyme	P13674	procollagen-proline dioxygenase	stroke, not specified as haemorrhage or infarction
Enzyme	P28300	protein-lysine 6-oxidase	aneurysm of unspecified site
Enzyme	P14891	hydroxymethylglutaryl-coa reductase (nadph)	coronary event
Enzyme	Q9FAB3	protein kinase a	cardiac contractility
Enzyme	P15144	membrane alanyl aminopeptidase	essential (primary) hypertension
Cytochrome	P11712	cyp-2c9	primary pulmonary hypertension;coronary heart disease
Enzyme	P29803	pyruvate dehydrogenase (acetyl-transferring)	peripheral vascular disease
Enzyme	Q06280	alpha-galactosidase	atherosclerosis
Nuclear Receptor	P10828	thyroid hormone beta	heart failure
Enzyme	O43293	death­associated protein kinase 3	cardiovascular disease, unspecified
Cytochrome	P33261	cyp-2c19	heart failure
Cytochrome	P04798	cyp-1a1	essential (primary) hypertension;stroke, not specified as haemorrhage or infarction;cerebral infarction, unspecified;coronary heart disease
GPCR	P47898	serotonin receptor type 5-ht5a	tachycardia, unspecified
Enzyme	Q9NVS9	pyridoxal 5'-phosphate synthase	essential (primary) hypertension
Enzyme	P16050	arachidonate 15-lipoxygenase	atherosclerosis
Enzyme	P09172	dopamine beta-monooxygenase	essential (primary) hypertension
Enzyme	P19835	triacylglycerol lipase	peripheral vascular disease
Enzyme	O00764	pyridoxal kinase	hypertension
Enzyme	P46883	amine oxidase (copper-containing)	cerebral infarction, unspecified;heart failure
Enzyme	P25786	proteasome endopeptidase complex	essential (primary) hypertension;atherosclerosis
GPCR	Q9H3N8	histamine receptor type 4	acute ischaemic heart disease, unspecified
GPCR	P34969	serotonin receptor type 5-ht7	tachycardia, unspecified
GPCR	P30939	serotonin receptor type 5-ht1f	essential (primary) hypertension
Enzyme	Q8NEB9	phosphatidylinositol 3-kinase	atherosclerosis;cardioprotective
Enzyme	P13587	sodium-exporting atpase	acute ischaemic heart disease, unspecified;atherosclerosis;essential (primary) hypertension;heart failure
Enzyme	P61626	lysozyme	cardiovascular collapse
Enzyme	P08254	stromelysin 1	abdominal aortic aneurysm, without mention of rupture
Enzyme	A1K4T5	non-chaperonin molecular chaperone atpase	atherosclerosis
Enzyme	P42336	phosphatidylinositol-4,5-bisphosphate 3-kinase	acute myocardial infarction, unspecified;heart failure
GPCR	P18089	adrenoceptor type 2b	essential (primary) hypertension;acute ischaemic heart disease, unspecified
Cytochrome	P19099	cyp-11b2	essential (primary) hypertension;dilated cardiomyopathy
Enzyme	Q96J92	serine/threonine-protein kinase wnk4	essential (primary) hypertension
Enzyme	P49888	estrone sulfotransferase	venous complication in pregnancy, unspecified
Enzyme	P49354	protein geranylgeranyltransferase type i	cardiovascular disease, unspecified
Enzyme	P23946	chymase	re-entry ventricular arrhythmia
Ion Channel	P23415	glycine gated-receptors	cardiovascular disease, unspecified
Ion Channel	P63252	potassium channels: inwardly rectifying type kir2.1	other cardiac arrhythmias
Enzyme	Q6UWV6	sphingomyelin phosphodiesterase	acute ischaemic heart disease, unspecified;cerebral infarction, unspecified;atherosclerosis
Enzyme	P07203	glutathione peroxidase	atherosclerosis
Enzyme	O14983	calcium-transporting atpase	acute ischaemic heart disease, unspecified;atherosclerosis;essential (primary) hypertension;heart failure
Enzyme	P22413	phosphodiesterase i	congestive heart failure
Enzyme	P11413	glucose-6-phosphate 1-dehydrogenase	essential (primary) hypertension;acute ischaemic heart disease, unspecified
Enzyme	O75936	gamma-butyrobetaine dioxygenase	acute ischaemic heart disease, unspecified
Enzyme	P29475	nitric-oxide synthase	atherosclerosis
Enzyme	O43837	isocitrate dehydrogenase (nad(+))	silent myocardial ischaemia
Enzyme	Q968X7	pyruvate dehydrogenase (nadp(+))	silent myocardial ischaemia
Enzyme	O43570	carbonate dehydratase	glaucoma
Enzyme	P08331	2',3'-cyclic-nucleotide 2'-phosphodiesterase	other specified cerebrovascular diseases
Ion Channel	P15382	voltage-gated k+ channel, kcne1 (mink protein)	other cardiac arrhythmias
Enzyme	P60484	phosphatidylinositol-3,4,5-trisphosphate 3-phosphatase	stroke, not specified as haemorrhage or infarction
Ion Channel	Q9Y3Q4	hyperpol-activated cyclic nucleotide-gated k+ channel type 4	other cardiac arrhythmias
Nuclear Receptor	P19793	retinoic acid x alpha	atherosclerosis
Enzyme	Q495T6	neprilysin	hypertensive heart and renal disease;atherosclerosis;heart failure
Enzyme	Q9Y233	3',5'-cyclic-gmp phosphodiesterase	primary pulmonary hypertension;acute ischaemic heart disease, unspecified
Ion Channel	Q9NY47	voltage-gated ca++ channels t-type	essential (primary) hypertension;angina pectoris, unspecified
Enzyme	P00338	l-lactate dehydrogenase	acute myocardial infarction, unspecified
GPCR	Q92847	ghrelin	beneficial cardiovascular function
Enzyme	P42892	endothelin-converting enzyme 1	heart failure
Enzyme	P08709	coagulation factor viia	thrombotic disease
Nuclear Receptor	P55055	oxysterol lxr beta	hyperlipidaemia, unspecified;atherosclerosis
Ion Channel	Q05586	nmda glutamate activated anionic channels	other specified cerebrovascular diseases
Enzyme	P25774	cathepsin s	embolism and thrombosis of unspecified vein
Enzyme	Q09013	myotonin­protein kinase, form i	cardiac contractility
Enzyme	P07327	alcohol dehydrogenase	cerebral infarction, unspecified
Enzyme	P50281	membrane-type matrix metalloproteinase-1	aneurysm of unspecified site
GPCR	P47900	purinoreceptor type 2y1	tachycardia, unspecified
Enzyme	P27169	arylesterase	atherosclerosis
Enzyme	O75116	rho-associated protein kinase 2	essential (primary) hypertension;cardiovascular disease, unspecified
Enzyme	Q9H1R3	myosin light chain kinase 2, skeletal/cardiac muscle	cardiovascular disease, unspecified
Enzyme	P22637	cholesterol oxidase	coronary heart disease
GPCR	P34972	cannabinoid receptor type 2	atherosclerosis
Enzyme	Q9H4A3	serine/threonine-protein kinase wnk1	essential (primary) hypertension
GPCR	P13945	adrenoceptor type b3	tachycardia, unspecified
GPCR	O95665	neuropeptide receptor type 2	vasoconstriction
Enzyme	P23458	janus kinase 1	acute ischaemic heart disease, unspecified
Enzyme	O95822	malonyl-coa decarboxylase	acute ischaemic heart disease, unspecified
Enzyme	P04040	catalase	aneurysm of unspecified site
Enzyme	Q53GL7	nad(+) adp-ribosyltransferase	acute myocardial infarction, unspecified;acute ischaemic heart disease, unspecified;heart failure
Enzyme	Q13873	bone morphogenetic protein receptor, type ii (s/t kinase)	pulmonary heart disease, unspecified
Enzyme	Q86BQ4	nucleotidase	atherosclerosis
GPCR	Q9HBX9	lgr7	heart failure
Enzyme	P11678	peroxidase	atherosclerosis
Enzyme	P00441	superoxide dismutase	subarachnoid haemorrhage, unspecified
Enzyme	Q5T7S2	activin a receptor type ii-like 1	cardiovascular disease, unspecified
Enzyme	P10144	granzyme b	failure and rejection of unspecified transplanted organ and tissue
Enzyme	Q15118	pyruvate dehydrogenase kinase	cardiac response
Cytochrome	P10632	cyp-2c8	cardiac arrhythmia, unspecified;coronary heart disease
Enzyme	P18054	arachidonate 12-lipoxygenase	atherosclerosis
Enzyme	O51628	hydroxymethylglutaryl-coa reductase	acute myocardial infarction, unspecified
Enzyme	P55084	acetyl-coa c-acyltransferase	angina pectoris
GPCR	P55085	proteinase-activated like receptor type 2	vasodilatation
Enzyme	P09237	mmp7	coronary heart disease
Enzyme	P49759	cdc­like kinase 1	embolism and thrombosis of unspecified vein
Enzyme	P55736	nadph dehydrogenase	acute myocardial infarction, unspecified
Nuclear Receptor	Q13133	oxysterol lxr alpha	hyperlipidaemia, unspecified;atherosclerosis
Enzyme	P19971	thymidine phosphorylase	silent myocardial ischaemia
Enzyme	P22680	cholesterol 7-alpha-monooxygenase	atherosclerosis
Enzyme	Q13164	mitogen-activated protein kinase 7	cardiovascular disease, unspecified
Enzyme	P27361	mitogen­activated protein kinase 3	acute ischaemic heart disease, unspecified
Enzyme	P50750	cell division protein kinase 9	cardiovascular disease, unspecified
GPCR	O15218	adrenomedullin receptor (g10d)	essential (primary) hypertension;atherosclerosis;heart failure
Enzyme	Q9UNH5	phosphoprotein phosphatase	heart failure
GPCR	Q9Y5N1	histamine receptor type 3	vasodilatation
Enzyme	Q86U10	1-alkyl-2-acetylglycerophosphocholine esterase	atherosclerosis
Enzyme	Q90392	aggrecanase	cardiomyopathy, unspecified
Enzyme	Q43880	thermolysin	cardiovascular disease, unspecified
Enzyme	P01160	atrial natriuretic peptide receptor a [precursor]	essential (primary) hypertension
Enzyme	Q9BW66	cyclin dependent kinase 2	coronary heart disease
Enzyme	Q01594	alliin lyase	thrombotic disease;atherosclerosis
Enzyme	Q8N5S9	calcium/calmodulin­dependent protein kinase iig	cardiovascular disease, unspecified
Enzyme	Q9NRD9	nad(p)h oxidase	essential (primary) hypertension
Enzyme	P06870	tissue kallikrein	essential (primary) hypertension
GPCR	P21917	dopamine receptor type 4	increases blood pressure
Enzyme	P11216	phosphorylase	acute ischaemic heart disease, unspecified
Cytochrome	P05181	cyp-2e1	acute ischaemic heart disease, unspecified;cardiomyopathy, unspecified;heart failure
Enzyme	P49841	glycogen synthase kinase-3 beta	cardiovascular disease, unspecified
Enzyme	P09958	furin	atherosclerosis
GPCR	Q9UKP6	urotensin receptor	chronic renal failure;essential (primary) hypertension;primary pulmonary hypertension;heart failure
Enzyme	P80386	amp­activated protein kinase beta­1	acute ischaemic heart disease, unspecified
Ion Channel	Q99271	non-voltage-gated na+ channels type nah1	silent myocardial ischaemia
Ion Channel	P42261	ampa glutamate activated anionic channels	other specified cerebrovascular diseases
Enzyme	P13922	thymidylate synthase	ovarian cancer;leishmania infections;proliferative diseases;pancreatic cancer;parasitic diseases;malaria;p. carinii pneumonia;chagas' disease;hepatocellular carcinoma;inflammation;breast cancer;colorectal cancer;microbial infections;autoimmune diseases;gastric cancer;cancer, unspecified;tuberculosis;leprosy, unspecified;trypanosomatid infections;fungal diseases;bacterial infections;toxoplasma inf…
Enzyme	P00742	coagulation factor xa	atrial fibrillation and flutter;coagulative disorders;thrombotic disease;thromboembolism;cardiovascular disease, unspecified;embolism and thrombosis of unspecified vein;thromboembolic disorders
Enzyme	P00813	adenosine deaminase	peripheral and cutaneous t-cell lymphomas;acute myeloid leukemia;chronic lymphocytic leukemia;chronic myeloid leukemia;coronary heart disease;non-hodgkin's lymphoma, unspecified type;hairy cell leukemia
Enzyme	P04054	phospholipase a2	eicosanoid-mediated disorders;atherosclerosis;inflammation;arthritis
Nuclear Receptor	P04150	glucocorticoid receptor	cocaine dependence;depressive disorders;atherosclerosis;drug dependence
GPCR	P07550	beta-2 adrenergic receptor	skeletal muscle weakness;glaucoma;asthma;skeletal muscle wasting;cardiac dysrhythmias;depressive disorders;vasodilatation;respiratory distress syndrome;obstructive airway disease;hypertension;inflammation;chronic obstructive pulmonary disease;multiple sclerosis;anxiety disorder, unspecified
GPCR	P08172	muscarinic acetylcholine receptor m2	hypothermia;essential (primary) hypertension;analgesics;tremor, unspecified;tachycardia, unspecified;pain, unspecified;chronic obstructive pulmonary disease;alzheimer's disease;autoimmune cardiomyopathy;bronchoconstriction (cold air-induced);neurogenic bladder
GPCR	P08173	muscarinic acetylcholine receptor m4	neurologic and psychiatric diseases;essential (primary) hypertension;analgesics;pain, unspecified;parkinsonian symptoms;manic disorder
Nuclear Receptor	P08235	mineralocorticoid receptor	essential (primary) hypertension;autoimmune and sudden sensorineural hearing loss;brain injury;heart failure
Enzyme	P08246	leukocyte elastase	asthma;attenuated coronary flow reserve and myocardial dysfunction;mucociliary dysfunction;emphysema;acute ischaemic heart disease, unspecified;respiratory distress syndrome;allergic rhinitis, unspecified;cystic fibrosis;intestinal ischemia-reperfusion associated with lung injury and the acute respiratory distress syndrome;chronic obstructive pulmonary disease;pulmonary edema (thrombin-induced);c…
Enzyme	P08253	72 kda type iv collagenase	hypertensive heart and renal disease;neuronal pain;unstable angina
GPCR	P08588	beta-1 adrenergic receptor	asthma;cardiac dysrhythmias;glaucoma;vasodilatation;dilated cardiomyopathy;hypertension;coronary heart disease;anxiety disorder, unspecified;cardiovascular disease, unspecified
GPCR	P08908	5-hydroxytryptamine receptor 1a	cerebral ischemia;essential (primary) hypertension;depressive disorders;skeletal muscle associated spasticity;cocaine dependence;detrusor hyperreflexia;mood [affective] disorders;anxiety disorder, unspecified;urinary incontinence
GPCR	P08912	muscarinic acetylcholine receptor m5	other specified cerebrovascular diseases;opioid dependence;schizophrenia
Enzyme	P09917	arachidonate 5-lipoxygenase	other specified cerebrovascular diseases;magnesium deficiency dermatitis;antigen-induced decrease in coronary flow and cardiac anaphylaxis;gastrointestinal cancers;respiratory distress syndrome;allergic rhinitis, unspecified;pancreatic cancer;inflammatory lung disease;acute myocardial infarction, unspecified;asthma;peripheral vascular disease;bronchiolar carcinoma;urological cancers;chronic myelo…
Nuclear Receptor	P10276	retinoic acid receptor alpha	atherosclerosis;acute promyelocytic leukemia
Nuclear Receptor	P10827	thyroid hormone receptor alpha	thyrotoxicosis [hyperthyroidism];heart failure
GPCR	P11229	muscarinic acetylcholine receptor m1	essential (primary) hypertension;schizophrenia;cognitive deficits;bronchospasm (histamine induced);alzheimer's disease
Enzyme	P11926	ornithine decarboxylase	other specified cerebrovascular diseases;hereditary polyposis syndromes;malaria;sleeping sickness;inflammation;trypanosomatid infections
Enzyme	P12821	angiotensin-converting enzyme	chronic obstructive pulmonary disease;vascular disease;atherosclerosis;hypertension;heart failure
GPCR	P14416	d(2) dopamine receptor	gilles de la tourette's disorder;delusional disorder;psychiatric illness;heart failure;respiratory diseases;cocaine dependence;parkinson's disease;depressive disorders;neurological diseases;attention deficit hyperactivity disorder;disabling peak-dose dyskinesias;schizophrenia;gastric emptying disorders;erectile dysfunction;nausea and vomiting;cognitive deficits;anxiety disorder, unspecified;neuro…
Enzyme	P14780	matrix metalloproteinase-9	rheumatoid arthritis;hypertensive heart and renal disease;multiple sclerosis;neuropathic pain;unstable angina
Ion Channel	P14867	gamma-aminobutyric acid receptor subunit alpha-1	anxiety disorders;insomnia;cardiovascular disease, unspecified
Enzyme	P15056	b-raf proto-oncogene serine/threonine-protein kinase	pancreatic cancer;malignant melanoma;melanoma;cardiovascular disease, unspecified
Enzyme	P15121	aldose reductase	diabetic neuropathy;analgesics;atherosclerosis;neuropathic pain;type ii diabetes mellitus;diabetic retinopathy;diabetic complications
Enzyme	P15538	cytochrome p450 11b1, mitochondrial	cushing's syndrome;essential (primary) hypertension;adrenocortical tumour;congestive heart failure
Enzyme	P17252	protein kinase c alpha type	diabetic nephropathy;alzheimer's disease;cardiovascular disease, unspecified
GPCR	P20309	muscarinic acetylcholine receptor m3	essential (primary) hypertension;obesity;urinary incontinence;airway hyperreactivity
Enzyme	P21397	amine oxidase [flavin-containing] a	social phobias;acute myocardial infarction, unspecified;depressive disorders;mood [affective] disorders
GPCR	P21554	cannabinoid receptor 1	migraine;analgesics;bradycardia, unspecified;orthostatic hypotension;pain, unspecified;inflammatory bowel disease;obesity
Enzyme	P21964	catechol-o-methyl-transferase	acute myocardial infarction, unspecified;parkinson's disease
Enzyme	P22303	acetylcholinesterase	motor neurone disease;atherosclerosis;hypoxic-ischemic encephalopathy;cognitive deficits;parkinson's disease;alzheimer's disease
Enzyme	P22894	neutrophil collagenase	rheumatoid arthritis;other acute ischaemic heart diseases
Enzyme	P23219	prostaglandin g/h synthase 1	atherosclerosis;cardiovascular disease, unspecified;chronic inflammatory diseases;coronary heart disease
GPCR	P25021	histamine h2 receptor	peptic ulcer;heart failure;lasting tachycardia;zollinger-ellison syndrome;epidermal hyperplasia;systemic arterial vasodilation
GPCR	P25103	substance-p receptor	asthma;visceral pain;essential (primary) hypertension;analgesics;tachycardia, unspecified;neuropathic pain;mood [affective] disorders
GPCR	P28221	5-hydroxytryptamine 1d receptor	cardiovascular disease, unspecified
GPCR	P28222	5-hydroxytryptamine receptor 1b	migraine;depressive disorders;pulmonary hypertension;obsessive-compulsive disorder;anxiety disorder, unspecified;cardiovascular disease, unspecified
GPCR	P28223	5-hydroxytryptamine receptor 2a	diabetic neuropathy;migraine;cocaine dependence;depressive disorders;acute ureteric colic;diabetic nephropathy;schizophrenia;essential (primary) hypertension;arterial embolism and thrombosis;anxiety disorder, unspecified;cardiovascular disease, unspecified
GPCR	P28335	5-hydroxytryptamine receptor 2c	essential (primary) hypertension;obesity;depressive disorders
GPCR	P29274	adenosine a2a receptor	neuropsychiatric disorders;brain injury;analgesics;depressive disorders;tachycardia, unspecified;ischemia reperfusion injuries;renal diseases;inflammation;parkinson's disease;oxygen-induced retinopathy;dyskinesia;neurodegenerative diseases
GPCR	P29275	adenosine a2b receptor	exposure to high and low air pressure and changes in air pressure;asthma
GPCR	P30542	adenosine a1 receptor	renal failure;asthma;cardiac dysrhythmias;analgesics;insulin resistance (obesity-related);chronic ileitis;inflammatory bowel disease;inflammation;type ii diabetes mellitus;supraventricular tachycardia
GPCR	P0DMS8	adenosine a3 receptor	depressive disorders;chronic ileitis;myocardial ischemia;acute ischaemic heart disease, unspecified;cancer, unspecified;inflammatory bowel disease
GPCR	P35367	histamine h1 receptor	hypotension;allergic diseases;systemic arterial vasodilation;epilepsy;motion sickness;chronic urticaria;epidermal hyperplasia;acute lymphoblastic leukaemia (therapy-refractory);allergic rhinitis, unspecified;ischemia;chronic rhinitis;seasonal allergic rhinitis;nausea and vomiting;anxiety disorder, unspecified;intimal hyperplasia;cardiovascular disease, unspecified
GPCR	P35368	alpha-1b adrenergic receptor	essential (primary) hypertension;shy-drager syndrome
Enzyme	P36507	dual specificity mitogen-activated protein kinase kinase 2	acute ischaemic heart disease, unspecified;alzheimer's disease
Nuclear Receptor	P37231	peroxisome proliferator activated receptor gamma	atherosclerosis;type ii diabetes mellitus
Enzyme	P39900	macrophage metalloelastase	atherosclerosis;multiple sclerosis
GPCR	P41143	delta-type opioid receptor	cardiac arrhythmia, unspecified;analgesics;pain, unspecified;cough;parkinson's disease;ischemia;dyspnea
GPCR	P41145	kappa-type opioid receptor	cardiac arrhythmia, unspecified;analgesics;diarrhea;pain, unspecified;alcohol dependence;behcet's disease;neurodegenerative diseases;immune disease;focal ischemia;dyspnea
GPCR	P41595	5-hydroxytryptamine 2b receptor	migraine;essential (primary) hypertension;anxiety disorder, unspecified;multiple valve disorders in diseases classified elsewhere;p-chloroamphetamine-induced hyperglycemia
Enzyme	P43235	cathepsin k	atherosclerosis;osteoporosis
Ion Channel	P46098	5-hydroxytryptamine receptor 3a	hypotension, unspecified;pruritus;irritable bowel syndrome;diarrhea;alcohol dependence;nausea and vomiting
Enzyme	P49840	glycogen synthase kinase-3 alpha	cardiovascular disease, unspecified
GPCR	P50052	type-2 angiotensin ii receptor	essential (primary) hypertension;hypertension;heart failure
Enzyme	P50416	carnitine o-palmitoyltransferase i	obesity;angina pectoris;type ii diabetes mellitus
Enzyme	P53004	biliverdin reductase a	atherosclerosis;primary biliary cirrhosis
Enzyme	P78536	disintegrin and metalloproteinase domain-containing protein 17	rheumatoid arthritis;acute ischaemic heart disease, unspecified
Ion Channel	Q00975	voltage-dependent n-type calcium channel	cerebral ischemia;analgesics;neuropathic pain;transient cerebral ischaemic attack, unspecified;cardiovascular disease, unspecified;malignant pain
Enzyme	Q02156	protein kinase c epsilon type	alzheimer's disease;cardiovascular disease, unspecified
Enzyme	Q02750	dual specificity mitogen-activated protein kinase kinase 1	alzheimer's disease;cardiovascular disease, unspecified
Enzyme	Q05655	protein kinase c delta type	alzheimer's disease;cardiovascular disease, unspecified
Nuclear Receptor	Q07869	peroxisome proliferator-activated receptor alpha	cardiovascular prevention;atherosclerosis;lipid metabolic disorders;insulin resistance;hyperglycemia;hyperinsulinemia;obesity
Enzyme	Q08828	adenylate cyclase type 1	cardiotonic;dietary shortage;vasodilator
Ion Channel	Q09428	sulfonylurea receptor 1	vasodilatation;hypertension;type ii diabetes mellitus
GPCR	Q13639	5-hydroxytryptamine 4 receptor	psychiatric illness;cardiac dysrhythmias;irritable bowel syndrome;depressive disorders;tachycardia, unspecified;drug dependence;dementia;alzheimer's disease
Ion Channel	Q13936	voltage-dependent l-type calcium channel subunit alpha-1c	essential (primary) hypertension;angina pectoris, unspecified;heart disease;heart transplant
Enzyme	Q8TET4	alpha-glucosidase	cardiomyopathy, unspecified;type ii diabetes mellitus
Ion Channel	Q92736	ryanodine receptor	re-entry ventricular arrhythmia;other cardiac arrhythmias;malignant hyperthermia
Unclassified	A4D1B5	gamma-secretase-activating protein	alzheimer's disease
Ion Channel	A6H8K3	inositol 1,4,5-trisphosphate receptor, type 3	type i diabetes mellitus
Enzyme	B0QY33	casein kinase 1, epsilon	alzheimer's disease
Cytochrome	B3V1X5	fungal cytochrome p450 51	oropharyngeal candidiasis
Enzyme	C9JWY7	calpain-2 catalytic subunit	alzheimer's disease
Nuclear Receptor	D2KUA6	peroxisome proliferator-activated receptor gamma	type ii diabetes mellitus
Enzyme	E9PJA6	calpain-1 catalytic subunit	alzheimer's disease
Enzyme	E9PJJ3	calpain-1 catalytic subunit	alzheimer's disease
Enzyme	E9PL37	calpain-1 catalytic subunit	alzheimer's disease
Enzyme	E9PLC9	calpain-1 catalytic subunit	alzheimer's disease
Enzyme	E9PLQ6	calpain-1 catalytic subunit	alzheimer's disease
Enzyme	E9PLX0	calpain-1 catalytic subunit	alzheimer's disease
Enzyme	E9PMC6	calpain-1 catalytic subunit	alzheimer's disease
Enzyme	E9PQB3	calpain-1 catalytic subunit	alzheimer's disease
Enzyme	E9PRM1	calpain-1 catalytic subunit	alzheimer's disease
Enzyme	E9PSA6	calpain-1 catalytic subunit	alzheimer's disease
Enzyme	H0Y645	casein kinase i isoform epsilon	alzheimer's disease
Enzyme	O00519	fatty-acid amide hydrolase	anesthetic;analgesics;anxiety disorder, unspecified;sedation
Enzyme	O00763	acetyl-coa carboxylase 2	obesity
Enzyme	O00767	acyl-coa desaturase	obesity;cardiovascular disease, unspecified;dyslipidaemia;tuberculosis;type ii diabetes mellitus
Enzyme	O02604	thymidylate synthase	colorectal cancer;malaria;gastric cancer;ovarian cancer;proliferative diseases;fungal diseases;hepatocellular carcinoma;pancreatic cancer;breast cancer
Enzyme	O06913	fumarate reductase flavoprotein subunit	helicobacter pylori infection
Enzyme	O09807	hiv-1 protease	human immunodeficiency virus [hiv] disease
Enzyme	O14733	dual specificity mitogen-activated protein kinase kinase 7	alzheimer's disease
GPCR	O14843	free fatty acid receptor 3	metabolic diseases;inflammatory diseases
Unclassified	O15163	interleukin-2 receptor	neoplastic diseases;lymphoma
GPCR	O15552	free fatty acid receptor 2	metabolic diseases;inflammatory diseases
Ion Channel	O15554	calcium-activated potassium channel	graft-versus-host disease;sickle cell anemia;autoimmune diseases;diarrhea;cystic fibrosis;anemia, unspecified
Enzyme	O15696	ornithine decarboxylase	sleeping sickness;hereditary polyposis syndromes;trypanosomatid infections;malaria;inflammation
Enzyme	O33305	dihydrofolate reductase	microbial infections;malaria;p. carinii pneumonia;autoimmune diseases;leishmania infections;leprosy, unspecified;parasitic diseases;fungal diseases;cancer, unspecified;bacterial infections;inflammation;tuberculosis;toxoplasma infections;trypanosomatid infections;chagas' disease
Enzyme	O39644	dna polymerase	viral infection, unspecified;herpes virus infection;hepatitis b;parasitic diseases
Unclassified	O40239	transmembrane glycoprotein gp41	human immunodeficiency virus [hiv] disease
Enzyme	O43283	mitogen-activated protein kinase kinase kinase 13	alzheimer's disease
Enzyme	O43451	alpha-glucosidase	type ii diabetes mellitus
Enzyme	O43464	serine protease htra2, mitochondrial	parkinson's disease;neurodegenerative diseases;alzheimer's disease
Ion Channel	O43497	voltage-dependent t-type calcium channel alpha-1g subunit	angina pectoris;heart failure;cardiac dysrhythmias;analgesics;epilepsy;hypoinsulinemia;hypertension;neuropathic pain;cardiovascular disease, unspecified
Enzyme	O56072	hiv-1 integrase	human immunodeficiency virus [hiv] disease
Enzyme	O60260	e3 ubiquitin-protein ligase parkin	parkinson's disease
Ion Channel	O60741	potassium/sodium hyperpolarization-activated cyclic nucleotide-gated channel 1	depressive disorders
Ion Channel	O75762	transient receptor potential cation channel subfamily a member 1	analgesics;irritation
Enzyme	O75907	diacylglycerol o-acyltransferase	obesity;hypercholesterolemia;type ii diabetes mellitus
Enzyme	O76074	cgmp-specific 3',5'-cyclic phosphodiesterase	injury to spine and spinal cord;vascular disease;erectile dysfunction;pulmonary hypertension
Enzyme	O90777	hiv-1 protease	human immunodeficiency virus [hiv] disease
Enzyme	O94806	serine/threonine-protein kinase d3	alzheimer's disease
Unclassified	O94907	dickkopf-related protein 1	osteoporosis
Ion Channel	O95180	voltage-dependent t-type calcium channel subunit alpha-1h	migraine;vertigo of central and peripheral origin;analgesics;peripheral vascular disease
Unclassified	O95342	bile salt export pump	intrahepatic cholestasis;cholestasis
Enzyme	O96387	inosine-5'-monophosphate dehydrogenase	immunosuppression;severe acute respiratory syndrome;microbial infections;malaria;viral infection, unspecified;tritrichomonial infection;infections;parasitic diseases;trichomoniasis;cancer, unspecified;influenza a virus infection;lung cancer;hcv infection;leukemia, unspecified
Unclassified	P00363	fumarate reductase flavoprotein subunit	helicobacter pylori infection
Enzyme	P00374	dihydrofolate reductase	microbial infections;malaria;p. carinii pneumonia;autoimmune diseases;leishmania infections;leprosy, unspecified;parasitic diseases;fungal diseases;cancer, unspecified;bacterial infections;inflammation;tuberculosis;toxoplasma infections;trypanosomatid infections;chagas' disease
Enzyme	P00379	dihydrofolate reductase	microbial infections;malaria;p. carinii pneumonia;autoimmune diseases;leishmania infections;leprosy, unspecified;parasitic diseases;fungal diseases;cancer, unspecified;bacterial infections;inflammation;tuberculosis;toxoplasma infections;trypanosomatid infections;chagas' disease
Unclassified	P00451	coagulation factor viiia	sepsis
Enzyme	P00519	proto-oncogene tyrosine-protein kinase abl1	myeloma disease
Unclassified	P00533	epidermal growth factor receptor	nonsmall cell lung cancer;colorectal cancer;basal cell carcinoma;ovarian cancer;tumors;head and neck tumors;gliomas;cancer, unspecified;lymphangiomatosis;pancreatic cancer;breast cancer;hcv infection;solid tumor
Enzyme	P00575	plastid rna polymerase beta-subunit	malaria
Enzyme	P00734	thrombin	coagulative disorders;thrombotic disease;heparin-induced thrombocytopenia type ii;coronary heart disease;multiple organ failure;gliomas;thromboembolic disorders
Unclassified	P00747	plasminogen	excessive postoperative bleeding;hemorrhage
Enzyme	P00797	renin, renal	cancer, unspecified;hypertension
Enzyme	P00807	beta-lactamase	bacterial infections
Enzyme	P00811	beta-lactamase	bacterial infections
Enzyme	P00918	carbonic anhydrase ii	pancreatic cancer;glaucoma;renal failure
Enzyme	P00946	mannose-6-phosphate isomerase	fungal diseases
Enzyme	P00956	isoleucyl-trna synthetase (bacterial)	bacterial infections;microbial infections
Unclassified	P01008	antithrombin-iii	thrombotic disease
Unclassified	P01009	alpha-1-antitrypsin	conformational diseases (polymer formation associated liver disease)
Unclassified	P01031	complement c5	rheumatoid arthritis
Unclassified	P01375	tumor necrosis factor	asthma;crohn's disease, unspecified;heart failure;rheumatoid arthritis;chronic inflammatory diseases;type ii diabetes mellitus;hyperimmunoglobulinemia d;behcet's disease;congestive heart failure;periodic fever syndrome;solid tumor;alzheimer's disease;rheumatic diseases
Unclassified	P01584	interleukin-1 beta	psoriasis;atopic dermatitis;acne;pediatric;chronic hepatitis c
Unclassified	P01589	interleukin-2 receptor	neoplastic diseases;lymphoma
Unclassified	P02593	calmodulin	atopic asthma;cancer, unspecified
Unclassified	P02649	apolipoprotein e	alzheimer's disease
Unclassified	P02768	serum albumin	inflammatory diseases
Unclassified	P02996	elongation factor g	streptococcus pneumoniae infections
Nuclear Receptor	P03372	estrogen receptor	brain injury;postmenopausal symptoms;endocrine independent cancer;osteoporosis, unspecified;neurodegenerative diseases;cardiovascular disease, unspecified;breast cancer;coronary heart disease
Enzyme	P03886	nadh dehydrogenase	parkinson's disease
Enzyme	P03891	nadh dehydrogenase	parkinson's disease
Enzyme	P03897	nadh dehydrogenase	parkinson's disease
Enzyme	P04035	3-hydroxy-3-methylglutaryl-coenzyme a reductase	hypercholesterolemia;atherosclerosis;head and neck tumors;dyslipidaemia;hypertriglyceridemia;myocardial infarction;cardiovascular disease, unspecified;cervical cancer;coronary heart disease
Unclassified	P04070	vitamin k-dependent protein c	varicose and spider veins of the leg
Unclassified	P04229	hla class ii histocompatibility antigen, drb1-1	multiple sclerosis
Unclassified	P04286	penicillin binding protein 3	bacterial infections
Enzyme	P04293	dna polymerase (hsv)	viral infection, unspecified;herpes virus infection
Unclassified	P04612	hiv-1 tat protein	human immunodeficiency virus [hiv] disease
Enzyme	P04626	receptor protein-tyrosine kinase erbb-2	ovarian cancer;cancer, unspecified;breast cancer;colorectal cancer;gliomas
Unclassified	P04629	high affinity nerve growth factor receptor	prostate cancer;acute myeloid leukemia;pain, unspecified;cancer, unspecified;neurodegenerative diseases;pancreatic cancer;analgesics
Enzyme	P04746	pancreatic alpha-amylase	pancreatic disease;hypoglycemia
Enzyme	P04818	thymidylate synthase	colorectal cancer;malaria;gastric cancer;ovarian cancer;proliferative diseases;fungal diseases;hepatocellular carcinoma;pancreatic cancer;breast cancer
Enzyme	P05021	dihydroorotate dehydrogenase, mitochondrial	immunosuppression;inflammatory diseases;malaria;autoimmune diseases;tumors;arthritis;proliferative diseases;fungal diseases;cancer, unspecified;bacterial infections;hepatocellular carcinoma;pneumocystis infections;rheumatoid arthritis;parasitic diseases
Unclassified	P05023	sodium/potassium-transporting atpase alpha-1 chain	atrial fibrillation and flutter;heart failure
Unclassified	P05067	amyloid beta a4 protein	alzheimer's disease
Enzyme	P05092	peptidyl-prolyl cis-trans isomerase a	human immunodeficiency virus [hiv] disease
Enzyme	P05093	17 alpha-hydroxylase-c17, 20-lyase	benign prostate hyperplasia;prostate cancer
Cytochrome	P05108	cytochrome p450 11a1, mitochondrial	cushing's syndrome;adrenocortical tumour
Enzyme	P05129	protein kinase c gamma type	alzheimer's disease
Enzyme	P05186	alkaline phosphatase, tissue-nonspecific	cancer, unspecified
Unclassified	P05217	tubulin beta-2 chain	tumors
Unclassified	P05546	heparin cofactor ii	thrombotic disease
Unclassified	P05556	integrin beta-1	arthritis;asthma
Enzyme	P05771	protein kinase c beta type	alzheimer's disease;diabetes
Unclassified	P06126	t-cell surface glycoprotein cd1a	renal transplant rejection
Unclassified	P06213	insulin receptor	diabetes mellitus
Enzyme	P06239	proto-oncogene tyrosine-protein kinase lck	chronic myeloid leukemia
Enzyme	P06241	proto-oncogene tyrosine-protein kinase fyn	chronic myeloid leukemia
Enzyme	P06276	cholinesterase	schizophrenia;alzheimer's disease
Nuclear Receptor	P06401	progesterone receptor	breast cancer
Enzyme	P06576	h+-atp synthase	obesity
Unclassified	P06729	t-cell surface antigen cd2	psoriasis
Enzyme	P06744	glucose-6-phosphate isomerase	kindling epileptogenesis
Enzyme	P06818	neuraminidase	influenza, virus not identified
Unclassified	P06821	influenza a virus m2 protein	influenza a virus infection
Enzyme	P06858	lipoprotein lipase	dyslipidaemia
Enzyme	P06981	inosine-5'-monophosphate dehydrogenase	immunosuppression;severe acute respiratory syndrome;microbial infections;malaria;viral infection, unspecified;tritrichomonial infection;infections;parasitic diseases;trichomoniasis;cancer, unspecified;influenza a virus infection;lung cancer;hcv infection;leukemia, unspecified
Enzyme	P07098	gastric triacylglycerol lipase	gastric disease
Enzyme	P07101	tyrosine 3-monooxygenase	pheochromocytoma
Enzyme	P07202	thyroid peroxidase	thyrotoxicosis [hyperthyroidism]
Unclassified	P07333	macrophage colony-stimulating factor receptor	non-myeloid cancer;febrile neutropenia;bone marrow transplant
Enzyme	P07384	calpain-1 catalytic subunit	alzheimer's disease
Unclassified	P07437	tubulin beta	helminth infection
Unclassified	P07766	t-cell surface glycoprotein cd3 epsilon chain	organ rejection
Enzyme	P07805	ornithine decarboxylase	sleeping sickness;hereditary polyposis syndromes;trypanosomatid infections;malaria;inflammation
Enzyme	P07918	dna polymerase (hsv-2)	human cytomegalovirus infections
Enzyme	P07947	proto-oncogene tyrosine-protein kinase yes	chronic myeloid leukemia
Unclassified	P07949	proto-oncogene tyrosine-protein kinase receptor ret	medullary thyroid carcinoma
Unclassified	P08069	insulin-like growth factor i receptor	colorectal cancer;tumors;medulloblastoma;cancer, unspecified;peripheral neuroectodermal tumor;ewing's sarcoma
Unclassified	P08150	penicillin binding protein 2	gram-negative bacterial infection
Unclassified	P08185	corticosteroid-binding globulin	obesity [cortisol driven]
Unclassified	P08473	neprilysin	prostate cancer;hypertension;congestive heart failure
Unclassified	P08514	integrin alpha-iib	ischemia;unstable angina
Enzyme	P08515	glutathione s-transferase	helminth infection;asthma;malaria;tumors;cancer, unspecified;neurodegenerative diseases;schistosomiasis [bilharziasis];multiple sclerosis
Enzyme	P08543	ribonucleoside-diphosphate reductase	prostate cancer;malaria;retrovirus-induced immunodeficiency disease;human immunodeficiency virus [hiv] disease;tumors;cancer, unspecified;herpes virus infection;breast cancer
Cytochrome	P08684	cytochrome p450 3a4	hypothalamic-pituitary acth function
Unclassified	P08887	interleukin-6 receptor	rheumatoid arthritis
GPCR	P08913	alpha-2a adrenergic receptor	myocardial ischemia;hypertension;heart failure
Unclassified	P09871	complement c1s component	hereditary angioedema;inflammation
Enzyme	P09874	poly [adp-ribose] polymerase-1	multiple sclerosis;asthma;tumors;diabetic endothelial dysfunction;cancer, unspecified;traumatic brain injury;chronic obstructive pulmonary disease;diabetic cardiovascular dysfunction
Enzyme	P09936	ubiquitin carboxyl-terminal hydrolase isozyme l1	parkinson's disease
Unclassified	P0A3M5	penicillin binding protein 2	gram-negative bacterial infection
Enzyme	P0A5Y6	enoyl-[acyl-carrier-protein] reductase [nadh]	tuberculosis
Enzyme	P0A6J8	d-alanine-d-alanine ligase a	tuberculosis
Unclassified	P0A6M8	elongation factor g	streptococcus pneumoniae infections
Enzyme	P0A8V2	plastid rna polymerase beta-subunit	malaria
Enzyme	P0ABQ4	dihydrofolate reductase	microbial infections;malaria;p. carinii pneumonia;autoimmune diseases;leishmania infections;leprosy, unspecified;parasitic diseases;fungal diseases;cancer, unspecified;bacterial infections;inflammation;tuberculosis;toxoplasma infections;trypanosomatid infections;chagas' disease
Unclassified	P0AD68	penicillin binding protein 3	bacterial infections
Enzyme	P0AEK4	enoyl-acp reductase	bacterial infections;malaria
Enzyme	P0AEK5	enoyl-acp reductase	bacterial infections;malaria
Enzyme	P0AEK6	enoyl-acp reductase	bacterial infections;malaria
Enzyme	P0AES4	dna topoisomerase ii	malaria;leishmania infections;acute promyelocytic leukemia;trichomoniasis;fungal diseases;cancer, unspecified;bacterial infections;herpes virus infection
Enzyme	P0AES6	dna topoisomerase ii	malaria;leishmania infections;acute promyelocytic leukemia;trichomoniasis;fungal diseases;cancer, unspecified;bacterial infections;herpes virus infection
Enzyme	P10253	alpha-glucosidase	type ii diabetes mellitus
Nuclear Receptor	P10275	androgen receptor	prostate cancer;spinal and bulbar muscular atrophy
Cytochrome	P10613	fungal cytochrome p450 51	oropharyngeal candidiasis
Cytochrome	P10635	cytochrome p450 2d6	insomnia
Unclassified	P10721	mast/stem cell growth factor receptor	ovarian cancer;gastrointestinal stromal tumors;phyllodes tumours;renal cell carcinoma;cancer, unspecified;inflammation;lung cancer
Unclassified	P10912	growth hormone receptor	acromegaly and pituitary gigantism
Unclassified	P11142	73-kda molecular chaperone hsp73	bacterial infections
Enzyme	P11387	dna topoisomerase i	brain cancer;colorectal cancer;gastric cancer;esophageal squamous cell cancer;fungal diseases;cancer, unspecified;lymphoblast tumor;ovarian cancer;lung cancer;breast cancer
Enzyme	P11388	dna topoisomerase ii	malaria;leishmania infections;acute promyelocytic leukemia;trichomoniasis;fungal diseases;cancer, unspecified;bacterial infections;herpes virus infection
Nuclear Receptor	P11473	vitamin d receptor	vitamin d deficiency;prostate cancer;breast cancer;colorectal cancer;kaposi's sarcoma
Cytochrome	P11511	cytochrome p450 19	mccune-albright syndrome;male infertility;estrogen disorders;breast cancer;peripheral precocious puberty;neurodegenerative diseases;endometriosis
Unclassified	P11836	b-lymphocyte antigen cd20	cancer, unspecified;b-cell lymphoma
Enzyme	P11876	dna (cytosine-5)-methyltransferase	solid tumor;hepatocellular carcinoma;leukemia, unspecified
Unclassified	P12235	adenine nucleotide translocator 1	osteolysis;hypercalcemia of malignancy
Unclassified	P12259	coagulation factor va	sepsis
Enzyme	P12268	inosine-5'-monophosphate dehydrogenase 2	leukemia, unspecified
Unclassified	P12318	low affinity immunoglobulin gamma fc region receptor ii-a	systemic lupus erythematosus
Unclassified	P12319	high affinity immunoglobulin epsilon receptor	risk of administering penicillin
Enzyme	P12931	proto-oncogene tyrosine-protein kinase src	cancer, unspecified;osteoporosis and other bone-related diseases;breast cancer;osteoporosis, unspecified
Enzyme	P13100	thymidylate synthase	colorectal cancer;malaria;gastric cancer;ovarian cancer;proliferative diseases;fungal diseases;hepatocellular carcinoma;pancreatic cancer;breast cancer
Unclassified	P13612	integrin alpha-4	multiple sclerosis;asthma;predominantly eosinophil mediated disease states;rheumatoid arthritis;allergic diseases;allergic rhinitis, unspecified;diabetes mellitus;inflammatory bowel disease;chronic experimental allergic encephalomyelitis
Nuclear Receptor	P13631	retinoic acid receptor gamma	emphysema;psoriasis;photoaging;acne
Enzyme	P13716	delta-aminolevulinic acid dehydratase	malaria
Enzyme	P14060	3 beta-hydroxysteroid dehydrogenase/delta 5-->4-isomerase	cushing's syndrome
Unclassified	P14207	folate receptor	folic acid deficiency;dietary shortage
Enzyme	P14324	farnesyl pyrophosphate synthetase	myeloma disease;trypanosomatid infections;hypercholesterolemia;skeletal disorders;toxoplasma infections;cancer, unspecified;osteoporosis, unspecified;chagas' disease;leishmania infections
Enzyme	P14550	alcohol dehydrogenase	methanol poisoning
Enzyme	P14679	tyrosine oxidase	dermatological disorders
Enzyme	P14735	insulin-degrading enzyme	alzheimer's disease
Unclassified	P14778	interleukin 1 receptor	rheumatoid arthritis
Unclassified	P14784	interleukin-2 receptor	neoplastic diseases;lymphoma
Enzyme	P14902	indoleamine 2,3-dioxygenase	depressive disorders
Unclassified	P15260	interferon-gamma receptor	pulmonary fibrosis
Unclassified	P15509	granulocyte-macrophage colony-stimulating factor receptor alpha chain	solid tumor;leukemia, unspecified
Unclassified	P16066	atrial natriuretic peptide receptor a	heart failure
Enzyme	P16184	dihydrofolate reductase	microbial infections;malaria;p. carinii pneumonia;autoimmune diseases;leishmania infections;leprosy, unspecified;parasitic diseases;fungal diseases;cancer, unspecified;bacterial infections;inflammation;tuberculosis;toxoplasma infections;trypanosomatid infections;chagas' disease
Enzyme	P16444	dehydropeptidase i	bacterial infections
GPCR	P16473	thyrotropin receptor	graves' disease
Unclassified	P17181	interferon-alpha/beta receptor	chronic hepatitis c;aids-related kaposi's sarcoma;malignant melanoma;multiple sclerosis;hairy cell leukemia
Unclassified	P17612	camp-dependent protein kinase catalytic subunit alpha	alzheimer's disease
Enzyme	P17655	calpain-2 catalytic subunit	alzheimer's disease
Unclassified	P17948	vascular endothelial growth factor receptor 1	angiogenesis;angiogenesis in metastatic and atherosclerotic processes;inflammatory diseases
Enzyme	P18314	urease	urinary tract infection
Ion Channel	P18507	gamma-aminobutyric acid receptor subunit gamma-2	brain injury
Unclassified	P19235	erythropoietin receptor	anemia, unspecified
Enzyme	P19784	casein kinase ii subunit alpha'	alzheimer's disease
Enzyme	P19871	3-beta-hydroxysteroid dehydrogenase	polyendocrinopathies (autoimmune);premature ovarian failure;female infertility (hyperprolactinemia);primary aldosteronism;tumors (androgen sensitive)
Enzyme	P20082	topoisomerase iv subunit a	urinary tract infection;bacterial infections
Unclassified	P20138	myeloid cell surface antigen cd33	acute myeloid leukemia
Unclassified	P20273	b-cell receptor cd22	lyme disease
Unclassified	P20645	mannose-6-phosphate receptor	glycogen storage disease type ii;mucopolysaccharidosis vi.
Unclassified	P20648	potassium-transporting atpase alpha chain 1	gastric ulcer;gastric acid hypersecretion;gastroesophageal reflux disease;acid-related diseases
Unclassified	P20701	lymphocyte function-associated antigen 1	inflammatory diseases
Enzyme	P20711	aromatic-l-amino-acid decarboxylase	parkinson's disease
Enzyme	P20839	inosine-5'-monophosphate dehydrogenase 1	inflammatory bowel disease
Unclassified	P21421	plastid rna polymerase beta-subunit	malaria
GPCR	P21728	dopamine d1 receptor	parkinson's disease
GPCR	P21731	thromboxane a2 receptor	platelet adhesion
Unclassified	P21802	fibroblast growth factor receptor 2	angiogenesis in metastatic and atherosclerotic processes
Unclassified	P21817	ryanodine receptor	malignant hyperthermia
GPCR	P21918	d(1b) dopamine receptor	respiratory diseases
Enzyme	P22033	methylmalonyl-coa mutase	b12 deficiency
Enzyme	P22612	camp-dependent protein kinase catalytic subunit gamma	alzheimer's disease
Enzyme	P22694	camp-dependent protein kinase catalytic subunit beta	alzheimer's disease
Enzyme	P22830	ferrochelatase	cancer, unspecified;photodynamic therapy
GPCR	P22888	lutropin-choriogonadotropic hormone receptor	endometriosis;benign prostate hyperplasia;prostate cancer;breast cancer
Enzyme	P22966	angiotensin-converting enzyme	chronic obstructive pulmonary disease;vascular disease;hypertension;heart failure
Enzyme	P23284	peptidyl-prolyl cis-trans isomerase b	heart disease
Unclassified	P23763	vesicle-associated membrane protein	parkinson's disease
GPCR	P23945	follicle stimulating hormone receptor	viral infection, unspecified;respiratory diseases;psychosis
Unclassified	P23975	sodium-dependent noradrenaline transporter	depressive disorders
GPCR	P24530	endothelin b receptor	glial proliferation;atopic asthma;neuronal injury;melanoma
Enzyme	P24723	protein kinase c eta type	alzheimer's disease
Unclassified	P24724	heat shock protein 90	viral infection, unspecified;cancer, unspecified;inflammation;malaria;ischemia
GPCR	P25100	alpha-1d adrenergic receptor	hypertension
GPCR	P25101	endothelin-1 receptor	ovarian cancer;atopic asthma;hypertension;chronic renal failure;cardiovascular disease, unspecified
GPCR	P25929	neuropeptide y receptor	obesity
Enzyme	P26282	dihydropteroate synthetase	bacterial infections;malaria
Enzyme	P26439	3 beta-hydroxysteroid dehydrogenase/delta 5-->4-isomerase	cushing's syndrome
Enzyme	P27338	amine oxidase [flavin-containing] b	depressive disorders;parkinson's disease;neurological diseases
Enzyme	P27448	map/microtubule affinity-regulating kinase 3	alzheimer's disease
Enzyme	P27487	dipeptidyl peptidase iv	autoimmune diseases;diabetes mellitus;obesity;malignancies;type ii diabetes mellitus
Enzyme	P27815	camp-specific 3',5'-cyclic phosphodiesterase 4a	chronic lymphocytic leukemia
Enzyme	P28845	1-beta-hydroxysteroid dehydrogenase 1	type ii diabetes mellitus
Enzyme	P28909	udp-n-acetylglucosamine 1-carboxyvinyltransferase	bacterial infections
Unclassified	P29459	interleukin-12	psoriasis;inflammatory diseases;crohn's disease;autoimmune diseases;guillain-barre syndrome;rheumatoid arthritis;lupus erythematosus
Enzyme	P29768	neuraminidase	influenza, virus not identified
Unclassified	P30273	high affinity immunoglobulin epsilon receptor	risk of administering penicillin
Unclassified	P30405	peptidyl-prolyl cis-trans isomerase f, mitochondrial	parkinson's disease
GPCR	P30411	b2 bradykinin receptor	hepatorenal syndrome;pancreatitis;sepsis;cardiac hypertrophy;hypertension;liver disease;cardiovascular disease, unspecified;asthma;visceral pain;analgesics;diabetic nephropathy;chronic rhinitis;alzheimer's disease;brain cancer;arthritis;cerebral edema;traumatic brain injury;colitis;diabetes;hereditary angioedema;tissue injury;restenosis;pediatric;myocardial infarction;lung cancer
GPCR	P30518	vasopressin v2 receptor	renal diseases;hydronephrosis;water-retaining diseases;von willebrand's disease;glaucoma;cerebral edema;nephrogenic diabetes insipidus;syndrome of inappropriate secretion of antidiuretic hormone;ocular hypertension;renal colic;congestive heart failure;liver cirrhosis;hyponatremia;diabetes insipidus
Unclassified	P30536	peripheral-type benzodiazepine receptor	brain cancer;melanoma;colorectal cancer;angina pectoris;autoimmune diseases;neurological diseases;myocardial ischemia;porphyrin-derived photocytotoxicity;viral infection, unspecified;cancer, unspecified;neurodegenerative diseases;photodynamic tumor;dementia;breast cancer
GPCR	P30556	type-1 angiotensin ii receptor	parkinson's disease;stroke;heart failure;hypertension;cardiovascular disease, unspecified
GPCR	P30559	oxytocin receptor	cancer, unspecified
GPCR	P30874	somatostatin receptor type 2	cushing's syndrome;cancer, unspecified;neuroblastoma
GPCR	P30968	gonadotropin-releasing hormone receptor	cancer, unspecified;hypogonadotropic hypogonadism;reproductive disorder
GPCR	P30988	calcitonin receptor	post-menopausal osteoporosis
Enzyme	P31327	carbamoyl-phosphate synthetase i	acute hyperammonaemia
Enzyme	P31350	ribonucleoside-diphosphate reductase subunit m2	cancer, unspecified
Unclassified	P31358	campath-1 antigen	acute promyelocytic leukemia
Unclassified	P31639	sodium/glucose cotransporter 2	type i diabetes mellitus;type ii diabetes mellitus
Unclassified	P31645	sodium-dependent serotonin transporter	depressive disorders
GPCR	P32239	gastrin/cholecystokinin type b receptor	neuroendocrine tumors;ovarian cancer;cocaine dependence;gastrointestinal cancers;medullary thyroid carcinoma;gastrointestinal motility disorders;gastrin sensitive tumours;acid-related diseases;lung cancer;anxiety disorder, unspecified;gliomas
GPCR	P32245	melanocortin receptor 4	obesity
Enzyme	P32476	squalene monooxygenase	fungal diseases;hypercholesterolemia
Unclassified	P33481	fusion glycoprotein	measles virus infections
Unclassified	P33527	multidrug resistance-associated protein 1	streptococcus pneumoniae infections;cystic fibrosis
Unclassified	P33681	t-lymphocyte activation antigen cd80	rheumatoid arthritis
Enzyme	P34229	fatty acid synthase subunit beta	tuberculosis
Enzyme	P34731	fatty acid synthase subunit beta	tuberculosis
Enzyme	P34948	mannose-6-phosphate isomerase	fungal diseases
Enzyme	P34949	mannose-6-phosphate isomerase	fungal diseases
Enzyme	P35228	nitric oxide synthase, inducible	ischemia reperfusion injuries
Enzyme	P35354	prostaglandin g/h synthase 2	prostate cancer;dysmenorrhea, unspecified;osteoarthritis;vascular lesion regression;renal cell carcinoma;pain, unspecified;stroke;malignant mesothelioma;inflammatory diseases;adenomatous polyposis;bladder cancer;analgesics;gestational hypertension;inflammation;breast cancer;genitourinary tumors;colorectal cancer;rheumatoid arthritis;arthritis;abdominal aortic aneurysm;carpal tunnel syndrome;carci…
GPCR	P35372	mu-type opioid receptor	analgesics;diarrhea;pain, unspecified;opioid-induced bowel dysfunction;cough;dyspnea
GPCR	P35462	d(3) dopamine receptor	respiratory diseases;psychiatric illness;neurological diseases;schizophrenia;drug dependence;parkinson's disease
Ion Channel	P35498	sodium channel protein type 1 subunit alpha	seizures;analgesics;local anesthesia
Ion Channel	P35499	sodium channel protein type 4 subunit alpha	analgesics;seizures in epilepsy;seizures of lennox-gastaut syndrome
Enzyme	P35557	glucokinase	type ii diabetes mellitus
Unclassified	P35968	vascular endothelial growth factor receptor 2	angiogenesis;cancer, unspecified
Unclassified	P35973	fusion glycoprotein	measles virus infections
Ion Channel	P36544	neuronal acetylcholine receptor protein, alpha-7 chain	analgesics;neuropsychiatric disorders;schizophrenia;drug dependence;alzheimer's disease
Unclassified	P36888	fl cytokine receptor	autoimmune diseases;acute myeloid leukemia;mll-rearranged acute lymphoblastic leukemias
Unclassified	P37088	amiloride-sensitive sodium channel alpha-subunit	pain, unspecified;analgesics;depressive disorders;convulsions;stroke
Enzyme	P37268	squalene synthase	hypercholesterolemia
GPCR	P37288	vasopressin v1a receptor	renal diseases;dysmenorrhea, unspecified;water-retaining diseases;raynaud's syndrome;vasoconstriction;hypertension;congestive heart failure
Unclassified	P37840	alpha-synuclein	parkinson's disease
Unclassified	P38435	vitamin k-dependent gamma-carboxylase	anticoagulant;hemorrhage
Unclassified	P38484	interferon-gamma receptor	pulmonary fibrosis
Unclassified	P38606	vacuolar atp synthase catalytic subunit a	obesity;net blotch
Enzyme	P38631	1,3-beta-glucan synthase	fungal diseases
Enzyme	P38678	1,3-beta-glucan synthase	fungal diseases
Ion Channel	P39086	glutamate receptor, ionotropic kainate 1	analgesics;epilepsy
Unclassified	P40189	interleukin-6 receptor	rheumatoid arthritis
Unclassified	P40198	carcinoembryonic antigen	imaging colorectal tumors
Unclassified	P40238	thrombopoietin receptor	thrombocytopenia
Unclassified	P40763	signal transducer and activator of transcription 3	cancer, unspecified;kidney disease induced by mesangial proliferation
GPCR	P41180	extracellular calcium-sensing receptor	hyperparathyroidism, unspecified
Unclassified	P41439	folate receptor	folic acid deficiency;dietary shortage
GPCR	P41594	metabotropic glutamate receptor 5	schizophrenia
Enzyme	P41743	protein kinase c iota type	alzheimer's disease
Unclassified	P42081	t-lymphocyte activation antigen cd86	rheumatoid arthritis
Enzyme	P42345	serine/threonine-protein kinase mtor	cancer, unspecified;immunosuppression;depressive disorders
Enzyme	P42684	proto-oncogene tyrosine-protein kinase abl1	myeloma disease
GPCR	P43088	prostaglandin f2-alpha receptor	ocular hypertension;inflammatory diseases;bone disorders;dysmenorrhea, unspecified;glaucoma
GPCR	P43116	prostaglandin e2 receptor, ep2 subtype	cerebral oxidative damage
GPCR	P43119	prostacyclin receptor	inflammatory pain;diabetes mellitus;analgesics
GPCR	P43220	glucagon-like peptide 1 receptor	central nervous system diseases;diabetic neuropathy;obesity;type ii diabetes mellitus
Ion Channel	P43681	neuronal acetylcholine receptor protein, alpha-4 chain	analgesics;frontal lobe epilepsy;drug dependence;alzheimer's disease;neurodegenerative diseases
Unclassified	P45059	penicillin binding protein 3	bacterial infections
Enzyme	P45452	collagenase 3	rheumatoid arthritis
Enzyme	P45985	dual specificity mitogen-activated protein kinase kinase 4	alzheimer's disease
Enzyme	P46533	enoyl-[acyl-carrier-protein] reductase [nadh]	tuberculosis
Enzyme	P46843	thioredoxin reductase, cytoplasmic	amebiasis;malaria;rheumatoid arthritis;human immunodeficiency virus [hiv] disease;leprosy, unspecified;sjogren's syndrome;parasitic diseases;cancer, unspecified;bacterial infections;angina pectoris;pneumocystis infections;malignancies
Ion Channel	P47870	gamma-aminobutyric acid receptor subunit beta-2	insomnia
GPCR	P47871	glucagon receptor	lipid metabolic disorders;hyperglycemia;obesity;type i diabetes mellitus;type ii diabetes mellitus
GPCR	P47872	secretin receptor	diagnosis of pancreatic exocrine dysfunction and gastrinoma
Enzyme	P47989	xanthine dehydrogenase/oxidase	gout
GPCR	P48039	melatonin receptor type 1a	insomnia;depressive disorders;chronic primary insomnia
Ion Channel	P48544	atp-sensitive k+ channel	hypertonicity of bladder;type ii diabetes mellitus
Unclassified	P48551	interferon-alpha/beta receptor	chronic hepatitis c;aids-related kaposi's sarcoma;malignant melanoma;multiple sclerosis;hairy cell leukemia
Enzyme	P48729	casein kinase i isoform alpha	alzheimer's disease
Enzyme	P48730	casein kinase i isoform delta	alzheimer's disease
GPCR	P49019	hydroxycarboxylic acid receptor 3	atherosclerosis
Enzyme	P49058	inosine-5'-monophosphate dehydrogenase	immunosuppression;severe acute respiratory syndrome;microbial infections;malaria;viral infection, unspecified;tritrichomonial infection;infections;parasitic diseases;trichomoniasis;cancer, unspecified;influenza a virus infection;lung cancer;hcv infection;leukemia, unspecified
GPCR	P49146	neuropeptide y receptor	obesity
GPCR	P49286	melatonin receptor type 1b	insomnia
Enzyme	P49327	fatty acid synthase	cardiovascular disease, unspecified;dyslipidaemia;tuberculosis;type ii diabetes mellitus
Enzyme	P49429	4-hydroxyphenylpyruvate dioxygenase	viral infection, unspecified;hereditary tyrosinemia type i
Enzyme	P49674	casein kinase i isoform epsilon	alzheimer's disease
Unclassified	P49768	presenilin-1	alzheimer's disease
Unclassified	P49810	presenilin-2	alzheimer's disease
Enzyme	P49895	type i iodothyronine deiodinase	medullary thyroid carcinoma
Enzyme	P50097	inosine-5'-monophosphate dehydrogenase	immunosuppression;severe acute respiratory syndrome;microbial infections;malaria;viral infection, unspecified;tritrichomonial infection;infections;parasitic diseases;trichomoniasis;cancer, unspecified;influenza a virus infection;lung cancer;hcv infection;leukemia, unspecified
Enzyme	P50135	histamine n-methyltransferase	malaria
GPCR	P50406	5-hydroxytryptamine receptor 6	obesity;depressive disorders
Enzyme	P51649	succinate semialdehyde dehydrogenase, mitochondrial	riboflavin deficiency
GPCR	P51681	c-c chemokine receptor type 5	human immunodeficiency virus [hiv] disease
Ion Channel	P51787	potassium voltage-gated channel subfamily kqt member 1	cardiac dysrhythmias
Ion Channel	P51788	chloride channel protein 2	cystic fibrosis
Enzyme	P52333	tyrosine-protein kinase jak3	psoriasis;arthritis
Enzyme	P52564	dual specificity mitogen-activated protein kinase kinase 6	alzheimer's disease
Ion Channel	P54289	voltage-dependent calcium channel subunit alpha-2/delta-1	vasospastic angina;heart transplant;analgesics;hypertension;chronic stable angina
Enzyme	P54750	calcium/calmodulin-dependent 3',5'-cyclic nucleotide phosphodiesterase 1	erectile dysfunction;cardiovascular disease, unspecified
Enzyme	P54802	alpha-n-acetylglucosaminidase	osteoarthritis
Unclassified	P55011	solute carrier family 12 member 2	convulsions
Unclassified	P55017	solute carrier family 12 member 3	renal failure;diabetic nephropathy
Unclassified	P55157	microsomal triglyceride transfer protein	hypercholesterolemia
Unclassified	P56539	caveolin-3	cardiovascular protection
Ion Channel	P56696	potassium voltage-gated channel subfamily kqt member 4	convulsions
Enzyme	P56817	beta-secretase 1	alzheimer's disease
Unclassified	P60880	synaptosomal-associated protein 25	blepharospasm
Enzyme	P61076	thioredoxin reductase, cytoplasmic	amebiasis;malaria;rheumatoid arthritis;human immunodeficiency virus [hiv] disease;leprosy, unspecified;sjogren's syndrome;parasitic diseases;cancer, unspecified;bacterial infections;angina pectoris;pneumocystis infections;malignancies
Unclassified	P61278	somatostatin	disorders of cystine excretion
Enzyme	P62937	peptidyl-prolyl cis-trans isomerase a	human immunodeficiency virus [hiv] disease
Unclassified	P63027	vesicle-associated membrane protein	parkinson's disease
Unclassified	P63231	influenza a virus m2 protein	influenza a virus infection
Unclassified	P63316	troponin c	heart failure;biventricular heart failure
Enzyme	P67870	casein kinase ii subunit beta	alzheimer's disease
Enzyme	P68400	casein kinase ii subunit alpha	alzheimer's disease
Unclassified	P68871	hemoglobin	iron-deficiency anemia;documented iron deficiency
Unclassified	P69905	hemoglobin	iron-deficiency anemia;documented iron deficiency
Enzyme	P72525	topoisomerase iv subunit a	urinary tract infection;bacterial infections
Enzyme	P78368	casein kinase i isoform gamma-2	alzheimer's disease
Ion Channel	P78508	atp-sensitive inward rectifier potassium channel 10	cardiac dysrhythmias;analgesics;sudden cardiac death;unstable angina
Enzyme	P80404	4-aminobutyrate aminotransferase, mitochondrial	convulsions;epilepsy;huntington's disease;tardive dyskinesia
Enzyme	P80894	glutathione s-transferase	helminth infection;asthma;malaria;tumors;cancer, unspecified;neurodegenerative diseases;schistosomiasis [bilharziasis];multiple sclerosis
Enzyme	Q00313	dna topoisomerase i	brain cancer;colorectal cancer;gastric cancer;esophageal squamous cell cancer;fungal diseases;cancer, unspecified;lymphoblast tumor;ovarian cancer;lung cancer;breast cancer
Enzyme	Q00535	cyclin-dependent kinase 5	alzheimer's disease
Enzyme	Q00688	peptidyl-prolyl cis-trans isomerase fkbp3	parkinson's disease
Enzyme	Q01064	calcium/calmodulin-dependent 3',5'-cyclic nucleotide phosphodiesterase 1	erectile dysfunction;cardiovascular disease, unspecified
GPCR	Q01718	adrenocorticotropic hormone receptor	cushing's syndrome (acth independent)
Unclassified	Q01959	sodium-dependent dopamine transporter	parkinson's disease
Enzyme	Q02127	dihydroorotate dehydrogenase, mitochondrial	immunosuppression;inflammatory diseases;malaria;autoimmune diseases;tumors;arthritis;proliferative diseases;fungal diseases;cancer, unspecified;bacterial infections;hepatocellular carcinoma;pneumocystis infections;rheumatoid arthritis;parasitic diseases
Unclassified	Q02153	guanylate cyclase soluble subunit beta-1	heart failure
GPCR	Q02643	growth hormone-releasing hormone receptor	chronic renal failure;lipodystrophy;growth hormone deficiencies/abnormalities;hormone deficiencies
Enzyme	Q02880	dna topoisomerase ii	malaria;leishmania infections;acute promyelocytic leukemia;trichomoniasis;fungal diseases;cancer, unspecified;bacterial infections;herpes virus infection
Unclassified	Q03135	caveolin-1	cardiovascular protection
GPCR	Q03431	parathyroid hormone/parathyroid hormone-related peptide receptor	cancer-associated morbidity;malignancy-associated hypercalcemia
Enzyme	Q04609	glutamate carboxypeptidase ii	stroke;prostate cancer;motor neurone disease
Enzyme	Q04759	protein kinase c theta type	alzheimer's disease
Enzyme	Q05513	protein kinase c zeta type	alzheimer's disease
Unclassified	Q05940	synaptic vesicle amine transporter	cocaine dependence;neurodegenerative diseases
Enzyme	Q06278	aldehyde oxidase	acute leukaemia;psychiatric illness
Ion Channel	Q06432	voltage-dependent calcium channel subunit alpha-2/delta-1	vasospastic angina;heart transplant;analgesics;hypertension;chronic stable angina
Enzyme	Q08210	dihydroorotate dehydrogenase, mitochondrial	immunosuppression;inflammatory diseases;malaria;autoimmune diseases;tumors;arthritis;proliferative diseases;fungal diseases;cancer, unspecified;bacterial infections;hepatocellular carcinoma;pneumocystis infections;rheumatoid arthritis;parasitic diseases
Enzyme	Q08499	type iv phosphodiesterase	asthma
Enzyme	Q12610	dihydroorotate dehydrogenase, mitochondrial	immunosuppression;inflammatory diseases;malaria;autoimmune diseases;tumors;arthritis;proliferative diseases;fungal diseases;cancer, unspecified;bacterial infections;hepatocellular carcinoma;pneumocystis infections;rheumatoid arthritis;parasitic diseases
Ion Channel	Q12791	calcium-activated potassium channel	graft-versus-host disease;sickle cell anemia;autoimmune diseases;diarrhea;cystic fibrosis;anemia, unspecified
Ion Channel	Q12809	potassium voltage-gated channel subfamily h member 2	cardiac dysrhythmias
Ion Channel	Q12879	glutamate [nmda] receptor subunit epsilon 1	analgesics;pain (anesthesia, neuropathic)
Enzyme	Q13085	acetyl-coa carboxylase 1	obesity;type ii diabetes mellitus
Ion Channel	Q13224	glutamate [nmda] receptor subunit epsilon-2	depressive disorders;parkinson's disease
Unclassified	Q13262	estrogen receptor	brain injury;postmenopausal symptoms;endocrine independent cancer;osteoporosis, unspecified;neurodegenerative diseases;cardiovascular disease, unspecified;breast cancer;coronary heart disease
Enzyme	Q13332	receptor-type protein-tyrosine phosphatase s	paget's disease;osteoporosis, unspecified
Enzyme	Q13547	histone deacetylase 1	cancer, unspecified;prostate cancer;proliferative diseases
Enzyme	Q13554	calcium/calmodulin-dependent protein kinase type ii subunit beta	alzheimer's disease
Enzyme	Q13555	calcium/calmodulin-dependent protein kinase type ii subunit gamma	alzheimer's disease
Enzyme	Q13557	calcium/calmodulin-dependent protein kinase type ii subunit delta	alzheimer's disease
Unclassified	Q13621	solute carrier family 12 member 1	hypertension;congestive heart failure
Enzyme	Q14018	carboxyl ester lipase	hypercholesterolemia
Enzyme	Q14123	calcium/calmodulin-dependent 3',5'-cyclic nucleotide phosphodiesterase 1	erectile dysfunction;cardiovascular disease, unspecified
GPCR	Q14416	metabotropic glutamate receptor 2	schizophrenia
Enzyme	Q14432	cgmp-inhibited 3',5'-cyclic phosphodiesterase a	vascular disease;chronic myeloid leukemia;asthma
Ion Channel	Q14524	sodium channel protein type 5 subunit alpha	cardiac dysrhythmias;epileptic seizures;analgesics;refractory partial epilepsy;sustained ventricular tachycardia
Enzyme	Q14534	squalene monooxygenase	fungal diseases;hypercholesterolemia
Unclassified	Q14571	inositol 1,4,5-trisphosphate receptor	hypertension
Unclassified	Q14573	inositol 1,4,5-trisphosphate receptor, type 3	hypertension;type i diabetes mellitus
Unclassified	Q14626	interleukin-11 receptor alpha chain	chemotherapy-induced thrombocytopenia
Unclassified	Q14643	inositol 1,4,5-trisphosphate receptor	hypertension
Enzyme	Q14654	amp-activated protein kinase	type ii diabetes mellitus
GPCR	Q14833	metabotropic glutamate receptor 4	parkinson's disease
Nuclear Receptor	Q14994	orphan nuclear receptor nr1i3	neonatal jaundice;obesity
Enzyme	Q15139	serine/threonine-protein kinase d1	alzheimer's disease
Unclassified	Q15413	ryanodine receptor	malignant hyperthermia
GPCR	Q15761	neuropeptide y receptor type 5	obesity
Ion Channel	Q15822	neuronal acetylcholine receptor subunit alpha-2	anesthesia;postoperative residual curarisation
Ion Channel	Q15858	voltage-gated sodium channel subunit alpha nav1.7	analgesics;angina pectoris
Unclassified	Q16195	human keratin	fungal diseases
Unclassified	Q16236	nuclear factor erythroid 2-related factor 2	liver disease
Enzyme	Q16512	serine/threonine-protein kinase n1	alzheimer's disease
Enzyme	Q16513	serine/threonine-protein kinase n2	alzheimer's disease
Enzyme	Q16739	ceramide glucosyltransferase	sphingolipid storage disorders
Cytochrome	Q16850	fungal cytochrome p450 51	oropharyngeal candidiasis
Enzyme	Q16881	thioredoxin reductase, cytoplasmic	amebiasis;malaria;rheumatoid arthritis;human immunodeficiency virus [hiv] disease;leprosy, unspecified;sjogren's syndrome;parasitic diseases;cancer, unspecified;bacterial infections;angina pectoris;pneumocystis infections;malignancies
Enzyme	Q25861	thioredoxin reductase, cytoplasmic	amebiasis;malaria;rheumatoid arthritis;human immunodeficiency virus [hiv] disease;leprosy, unspecified;sjogren's syndrome;parasitic diseases;cancer, unspecified;bacterial infections;angina pectoris;pneumocystis infections;malignancies
Enzyme	Q27793	dihydrofolate reductase	microbial infections;malaria;p. carinii pneumonia;autoimmune diseases;leishmania infections;leprosy, unspecified;parasitic diseases;fungal diseases;cancer, unspecified;bacterial infections;inflammation;tuberculosis;toxoplasma infections;trypanosomatid infections;chagas' disease
Enzyme	Q47746	d-alanyl-d-alanine carboxypeptidase	bacterial infections
Unclassified	Q4U2R8	organic anion transporter 1	gout
Enzyme	Q4WQY4	mannitol 2-dehydrogenase	renal failure
Enzyme	Q4X1A4	mannitol-1-phosphate 5-dehydrogenase	renal failure
Unclassified	Q59ES2	inositol 1,4,5-trisphosphate receptor, type 3	type i diabetes mellitus
GPCR	Q5NUL3	omega-3 fatty acid receptor 1	prevent metabolic diseases;type ii diabetes mellitus
Enzyme	Q5S007	leucine-rich repeat serine/threonine-protein kinase 2	parkinson's disease
Unclassified	Q5STB3	tumor necrosis factor	alzheimer's disease
Enzyme	Q5U045	casein kinase 1 epsilon	alzheimer's disease
Unclassified	Q5VVX3	e3 ubiquitin-protein ligase parkin	parkinson's disease
Enzyme	Q67889	hbv polymerase	hepatitis b
Enzyme	Q69617	hiv-1 reverse transcriptase	human immunodeficiency virus [hiv] disease
Enzyme	Q6FI27	glycogen synthase kinase 3 beta, isoform cra_b	alzheimer's disease
Enzyme	Q6MWZ3	acyl-coa desaturase	dyslipidaemia;tuberculosis;cardiovascular disease, unspecified
Enzyme	Q6P5Z2	serine/threonine-protein kinase n3	alzheimer's disease
Enzyme	Q7KZI7	serine/threonine-protein kinase mark2	alzheimer's disease
Unclassified	Q7X2I2	dna-dependent rna polymerase at the beta subunit	bacterial infections
Ion Channel	Q7Z2W7	transient receptor potential cation channel subfamily m member 8	analgesics;irritation
Unclassified	Q7Z7J9	calcium/calmodulin-dependent protein kinase ii inhibitor 1	alzheimer's disease
Enzyme	Q7Z7S3	thioredoxin reductase, cytoplasmic	amebiasis;malaria;rheumatoid arthritis;human immunodeficiency virus [hiv] disease;leprosy, unspecified;sjogren's syndrome;parasitic diseases;cancer, unspecified;bacterial infections;angina pectoris;pneumocystis infections;malignancies
Enzyme	Q86C09	farnesyl pyrophosphate synthetase	myeloma disease;trypanosomatid infections;hypercholesterolemia;skeletal disorders;toxoplasma infections;cancer, unspecified;osteoporosis, unspecified;chagas' disease;leishmania infections
Enzyme	Q8I372	dihydrofolate reductase	microbial infections;malaria;p. carinii pneumonia;autoimmune diseases;leishmania infections;leprosy, unspecified;parasitic diseases;fungal diseases;cancer, unspecified;bacterial infections;inflammation;tuberculosis;toxoplasma infections;trypanosomatid infections;chagas' disease
Enzyme	Q8IAU3	dihydropteroate synthetase	bacterial infections;malaria
Unclassified	Q8III6	heat shock protein 90	viral infection, unspecified;cancer, unspecified;inflammation;malaria;ischemia
Enzyme	Q8J0U0	thioredoxin reductase, cytoplasmic	amebiasis;malaria;rheumatoid arthritis;human immunodeficiency virus [hiv] disease;leprosy, unspecified;sjogren's syndrome;parasitic diseases;cancer, unspecified;bacterial infections;angina pectoris;pneumocystis infections;malignancies
Enzyme	Q8MU52	glutathione s-transferase	helminth infection;asthma;malaria;tumors;cancer, unspecified;neurodegenerative diseases;schistosomiasis [bilharziasis];multiple sclerosis
Enzyme	Q8NBP7	proprotein convertase subtilisin/kexin type 9	hypercholesterolemia
Ion Channel	Q8NDX3	voltage-gated sodium channel	injury to spine and spinal cord;pain, unspecified;analgesics;epilepsy
GPCR	Q8TDS4	hydroxycarboxylic acid receptor 2	atherosclerosis;dyslipidaemia
Enzyme	Q8WW43	gamma-secretase subunit aph-1b	alzheimer's disease
Unclassified	Q91MJ9	fusion glycoprotein	measles virus infections
Enzyme	Q92523	carnitine o-palmitoyltransferase i	obesity;type ii diabetes mellitus
Unclassified	Q92731	estrogen receptor beta	vascular injury response;prostate cancer;breast cancer;neurodegenerative diseases;cardiovascular disease, unspecified
Enzyme	Q93RQ9	dihydropteroate synthetase	bacterial infections;malaria
Enzyme	Q965D5	enoyl-acp reductase	bacterial infections;malaria
Enzyme	Q96BI3	gamma-secretase subunit aph-1a	alzheimer's disease
Unclassified	Q96DZ4	mmp1 protein	rheumatoid arthritis;neuropathic pain
Unclassified	Q96L34	map/microtubule affinity-regulating kinase 4	alzheimer's disease
Enzyme	Q96L46	calpain-1 catalytic subunit	alzheimer's disease
Enzyme	Q96PD7	diacylglycerol o-acyltransferase 2	lipid disorders, cardiovascular disease;dyslipidaemia
Nuclear Receptor	Q96RI1	bile acid receptor	intrahepatic cholestasis;cancer, unspecified;hypercholesterolemia
Unclassified	Q96S95	calcium/calmodulin-dependent protein kinase ii inhibitor 2	alzheimer's disease
Enzyme	Q96W63	dihydropteroate synthetase	bacterial infections;malaria
Cytochrome	Q96W81	fungal cytochrome p450 51	oropharyngeal candidiasis
Unclassified	Q97SQ3	elongation factor g	streptococcus pneumoniae infections
Unclassified	Q99062	macrophage colony-stimulating factor receptor	non-myeloid cancer;febrile neutropenia;bone marrow transplant
Unclassified	Q99497	protein dj-1	parkinson's disease
GPCR	Q99705	melanin-concentrating hormone receptor 1	obesity
Unclassified	Q99720	sigma(1)-type opioid receptor	neuropsychiatric disorders
Unclassified	Q99808	equilibrative nucleoside transporter 1	malaria
Enzyme	Q99UR8	isoleucyl-trna synthetase (bacterial)	bacterial infections;microbial infections
Enzyme	Q9BH77	enoyl-acp reductase	bacterial infections;malaria
Enzyme	Q9BIX9	dihydropteroate synthetase	bacterial infections;malaria
Unclassified	Q9BQB4	sclerostin	osteoporosis
Enzyme	Q9BQB6	vitamin k epoxide reductase complex subunit 1	thromboembolic disorders
GPCR	Q9BXA5	succinate receptor 1	renovascular hypertension;diabetic nephropathy
GPCR	Q9BXC0	hydroxycarboxylic acid receptor 1	atherosclerosis;dyslipidaemia
Enzyme	Q9BXM7	serine/threonine-protein kinase pink1, mitochondrial	parkinson's disease
Enzyme	Q9BZL6	serine/threonine-protein kinase d2	alzheimer's disease
Unclassified	Q9CDQ3	integral membrane protein lmrp	bacterial infections
Enzyme	Q9F0I5	cycloinulo-oligosaccharide fructanotransferase	measure kidney function
Unclassified	Q9GQW8	glutamate-gated chloride channel	helminth infection
GPCR	Q9H244	p2y purinoceptor 12	thrombotic disease;aggregation and activation of platelets;cardiovascular disease, unspecified
Unclassified	Q9HAB3	gamma-hydroxybutyrate receptor	depressive disorders;alcohol dependence;insomnia;narcolepsy
Enzyme	Q9HBH1	dihydrofolate reductase	microbial infections;malaria;p. carinii pneumonia;autoimmune diseases;leishmania infections;leprosy, unspecified;parasitic diseases;fungal diseases;cancer, unspecified;bacterial infections;inflammation;tuberculosis;toxoplasma infections;trypanosomatid infections;chagas' disease
Enzyme	Q9HCP0	casein kinase i isoform gamma-1	alzheimer's disease
Enzyme	Q9NGT0	glutamate dehydrogenase	malaria
Unclassified	Q9NIH7	equilibrative nucleoside transporter 1	malaria
Unclassified	Q9NPF7	interleukin-23	psoriasis;crohn's disease, unspecified
Unclassified	Q9NRD5	prkca-binding protein	diabetic nephropathy
Unclassified	Q9NYK1	toll-like receptor 7	skin cancer;hcv infection;basal cell carcinoma
Enzyme	Q9NZ42	gamma-secretase subunit pen-2	alzheimer's disease
Enzyme	Q9P0L2	serine/threonine-protein kinase mark1	alzheimer's disease
Ion Channel	Q9P0X4	voltage-dependent t-type calcium channel alpha-1g subunit	angina pectoris;heart failure;cardiac dysrhythmias;analgesics;epilepsy;hypoinsulinemia;hypertension;neuropathic pain;cardiovascular disease, unspecified
Unclassified	Q9UBC8	lymphocyte function-associated antigen 1	inflammatory diseases
Unclassified	Q9UGH3	sodium-dependent vitamin c transporter 2	primary biliary cirrhosis
Unclassified	Q9UHC9	niemann-pick c1-like protein 1	hypercholesterolemia
Ion Channel	Q9UK17	potassium voltage-gated channel subfamily d member 3	migraine;vertigo of central and peripheral origin;analgesics;peripheral vascular disease
Unclassified	Q9UL17	t-box transcription factor tbx21	autoimmune diseases;chronic inflammatory diseases
Unclassified	Q9UQM7	calcium/calmodulin-dependent protein kinase type ii subunit alpha	alzheimer's disease
GPCR	Q9Y271	cysteinyl leukotriene receptor 1	asthma
Ion Channel	Q9Y5Y9	sodium channel protein type 10 subunit alpha	pain, unspecified;analgesics;neuropathic pain;inflammatory diseases;angina pectoris
Enzyme	Q9Y5Z0	beta-secretase 2	alzheimer's disease
Enzyme	Q9Y6M4	casein kinase i isoform gamma-3	alzheimer's disease

## Sheet: DB metabolites-proteins
InchiKey	Molecule_Name	Uniprot_ID	Protein_Name	Known/Predicted	pAct	Max. Similarity	Methods	CScore
SFLSHLFXELFNJZ-QMMMGPOBSA-N	L-NORADRENALINE|L-NORADRENALIN|NOREPINEPHRINE	P14416	D(2) dopamine receptor	Known	13.1	---	---	---
RSDDHGSKLOSQFK-RVDMUPIBSA-N	AURAPTEN|7-GERANYL-OXYCOUMARIN|(+)-AURAPTENAL|AURAPTENE	P27338	Amine oxidase [flavin-containing] B	Known	12.2	---	---	---
RSDDHGSKLOSQFK-RVDMUPIBSA-N	AURAPTEN|7-GERANYL-OXYCOUMARIN|(+)-AURAPTENAL|AURAPTENE	P21397	Amine oxidase [flavin-containing] A	Known	10.5	---	---	---
YNNUSGIPVFPVBX-NHCUHLMSSA-N	CLEMATINE	P35367	Histamine H1 receptor	Known	9.8	---	---	---
STECJAGHUSJQJN-UHFFFAOYSA-N	SCOPOLAMINE|ATROSCINE	P08173	Muscarinic acetylcholine receptor M4	Known	9.6	---	---	---
STECJAGHUSJQJN-FWXGHANASA-N	HYOSCINE	P20309	Muscarinic acetylcholine receptor M3	Known	9.6	---	---	---
RKUNBYITZUJHSG-VFSICIBPSA-N	ATROPINE|HYOSCYAMINE|L-HYOSCYAMINE	P20309	Muscarinic acetylcholine receptor M3	Known	9.6	---	---	---
STECJAGHUSJQJN-UHFFFAOYSA-N	SCOPOLAMINE|ATROSCINE	P20309	Muscarinic acetylcholine receptor M3	Known	9.6	---	---	---
STECJAGHUSJQJN-FWXGHANASA-N	HYOSCINE	P08173	Muscarinic acetylcholine receptor M4	Known	9.6	---	---	---
RKUNBYITZUJHSG-VFSICIBPSA-N	ATROPINE|HYOSCYAMINE|L-HYOSCYAMINE	P11229	Muscarinic acetylcholine receptor M1	Known	9.6	---	---	---
RKUNBYITZUJHSG-VFSICIBPSA-N	ATROPINE|HYOSCYAMINE|L-HYOSCYAMINE	P08912	Muscarinic acetylcholine receptor M5	Known	9.5	---	---	---
GMRQFYUYWCNGIN-NKMMMXOESA-N	VITAMIN-D|VIT-D	P11473	Vitamin D3 receptor	Known	9.5	---	---	---
RKUNBYITZUJHSG-QKPAOTATSA-N	HYOSCYAMINE	P11229	Muscarinic acetylcholine receptor M1	Known	9.4	---	---	---
RKUNBYITZUJHSG-QKPAOTATSA-N	HYOSCYAMINE	P08173	Muscarinic acetylcholine receptor M4	Known	9.4	---	---	---
RKUNBYITZUJHSG-JJXSEGSLSA-N	ATROPINE	P11229	Muscarinic acetylcholine receptor M1	Known	9.4	---	---	---
RKUNBYITZUJHSG-JJXSEGSLSA-N	ATROPINE	P08173	Muscarinic acetylcholine receptor M4	Known	9.4	---	---	---
RKUNBYITZUJHSG-UHFFFAOYSA-N	ATROPINE|HYOSCYAMINE|L-HYOSCYAMINE	P11229	Muscarinic acetylcholine receptor M1	Known	9.4	---	---	---
RKUNBYITZUJHSG-UHFFFAOYSA-N	ATROPINE|HYOSCYAMINE|L-HYOSCYAMINE	P08173	Muscarinic acetylcholine receptor M4	Known	9.4	---	---	---
DRLFMBDRBRZALE-UHFFFAOYSA-N	MELATONIN	P48039	Melatonin receptor type 1A	Known	9.4	---	---	---
DRLFMBDRBRZALE-UHFFFAOYSA-N	MELATONIN	P49286	Melatonin receptor type 1B	Known	9.4	---	---	---
UQCNKQCJZOAFTQ-ISWURRPUSA-N	OXYMORPHINE	Q99720	Sigma non-opioid intracellular receptor 1	Known	9.4	---	---	---
RKUNBYITZUJHSG-JJXSEGSLSA-N	ATROPINE	P22303	Acetylcholinesterase	Known	9.3	---	---	---
RKUNBYITZUJHSG-PJPHBNEVSA-N	ATROPINE|HYOSCYAMINE	P22303	Acetylcholinesterase	Known	9.3	---	---	---
RKUNBYITZUJHSG-UHFFFAOYSA-N	ATROPINE|HYOSCYAMINE|L-HYOSCYAMINE	P22303	Acetylcholinesterase	Known	9.3	---	---	---
CIWBSHSKHKDKBQ-JLAZNSOCSA-N	(+)-ASCORBIC-ACID|ASCORBATE	P18089	Alpha-2B adrenergic receptor	Known	9.3	---	---	---
RKUNBYITZUJHSG-AUSYRVNMSA-N	ATROPINE|HYOSCYAMINE	P22303	Acetylcholinesterase	Known	9.3	---	---	---
RKUNBYITZUJHSG-QKPAOTATSA-N	HYOSCYAMINE	P22303	Acetylcholinesterase	Known	9.3	---	---	---
RKUNBYITZUJHSG-LGGPCSOHSA-N	ATROPINE|HYOSCYAMINE|L-HYOSCYAMINE	P22303	Acetylcholinesterase	Known	9.3	---	---	---
RKUNBYITZUJHSG-VFSICIBPSA-N	ATROPINE|HYOSCYAMINE|L-HYOSCYAMINE	P22303	Acetylcholinesterase	Known	9.3	---	---	---
RKUNBYITZUJHSG-JJXSEGSLSA-N	ATROPINE	P20309	Muscarinic acetylcholine receptor M3	Known	9.3	---	---	---
STECJAGHUSJQJN-UHFFFAOYSA-N	SCOPOLAMINE|ATROSCINE	P11229	Muscarinic acetylcholine receptor M1	Known	9.3	---	---	---
RKUNBYITZUJHSG-UHFFFAOYSA-N	ATROPINE|HYOSCYAMINE|L-HYOSCYAMINE	P20309	Muscarinic acetylcholine receptor M3	Known	9.3	---	---	---
RKUNBYITZUJHSG-QKPAOTATSA-N	HYOSCYAMINE	P08912	Muscarinic acetylcholine receptor M5	Known	9.3	---	---	---
STECJAGHUSJQJN-FWXGHANASA-N	HYOSCINE	P11229	Muscarinic acetylcholine receptor M1	Known	9.3	---	---	---
RKUNBYITZUJHSG-JJXSEGSLSA-N	ATROPINE	P08912	Muscarinic acetylcholine receptor M5	Known	9.3	---	---	---
RKUNBYITZUJHSG-UHFFFAOYSA-N	ATROPINE|HYOSCYAMINE|L-HYOSCYAMINE	P08912	Muscarinic acetylcholine receptor M5	Known	9.3	---	---	---
RKUNBYITZUJHSG-QKPAOTATSA-N	HYOSCYAMINE	P20309	Muscarinic acetylcholine receptor M3	Known	9.3	---	---	---
PROQIPRRNZUXQM-ZXXIGWHRSA-N	ESTRIOL	Q92731	Estrogen receptor beta	Known	9.2	---	---	---
RKUNBYITZUJHSG-VFSICIBPSA-N	ATROPINE|HYOSCYAMINE|L-HYOSCYAMINE	P08173	Muscarinic acetylcholine receptor M4	Known	9.2	---	---	---
VOXZDWNPVJITMN-ZBRFXRBCSA-N	17-BETA-ESTRADIOL|ESTRADIOL	Q92731	Estrogen receptor beta	Known	9.1	---	---	---
VOXZDWNPVJITMN-ZBRFXRBCSA-N	17-BETA-ESTRADIOL|ESTRADIOL	P03372	Estrogen receptor	Known	9.1	---	---	---
STECJAGHUSJQJN-YOHVKPHQSA-N	SCOPOLAMINE	P08173	Muscarinic acetylcholine receptor M4	Known	9.1	---	---	---
STECJAGHUSJQJN-YXPYLGEYSA-N	SCOPOLAMINE	P20309	Muscarinic acetylcholine receptor M3	Known	9.1	---	---	---
STECJAGHUSJQJN-MKXJHAPZSA-N	SCOPOLAMINE	P11229	Muscarinic acetylcholine receptor M1	Known	9.1	---	---	---
STECJAGHUSJQJN-QBMZJCKTSA-N	ATROSCINE	P08173	Muscarinic acetylcholine receptor M4	Known	9.1	---	---	---
STECJAGHUSJQJN-PMFPHFEJSA-N	SCOPOLAMINE	P08173	Muscarinic acetylcholine receptor M4	Known	9.1	---	---	---
STECJAGHUSJQJN-OYVHKFOJSA-N	SCOPOLAMINE	P08173	Muscarinic acetylcholine receptor M4	Known	9.1	---	---	---
STECJAGHUSJQJN-MKXJHAPZSA-N	SCOPOLAMINE	P08173	Muscarinic acetylcholine receptor M4	Known	9.1	---	---	---
STECJAGHUSJQJN-USLFZFAMSA-N	SCOPOLAMINE	P08173	Muscarinic acetylcholine receptor M4	Known	9.1	---	---	---
STECJAGHUSJQJN-USLFZFAMSA-N	SCOPOLAMINE	P20309	Muscarinic acetylcholine receptor M3	Known	9.1	---	---	---
STECJAGHUSJQJN-PMFPHFEJSA-N	SCOPOLAMINE	P20309	Muscarinic acetylcholine receptor M3	Known	9.1	---	---	---
STECJAGHUSJQJN-YOHVKPHQSA-N	SCOPOLAMINE	P11229	Muscarinic acetylcholine receptor M1	Known	9.1	---	---	---
STECJAGHUSJQJN-YXPYLGEYSA-N	SCOPOLAMINE	P08173	Muscarinic acetylcholine receptor M4	Known	9.1	---	---	---
STECJAGHUSJQJN-QBMZJCKTSA-N	ATROSCINE	P20309	Muscarinic acetylcholine receptor M3	Known	9.1	---	---	---
STECJAGHUSJQJN-YOHVKPHQSA-N	SCOPOLAMINE	P20309	Muscarinic acetylcholine receptor M3	Known	9.1	---	---	---
STECJAGHUSJQJN-PMFPHFEJSA-N	SCOPOLAMINE	P11229	Muscarinic acetylcholine receptor M1	Known	9.1	---	---	---
STECJAGHUSJQJN-OYVHKFOJSA-N	SCOPOLAMINE	P11229	Muscarinic acetylcholine receptor M1	Known	9.1	---	---	---
STECJAGHUSJQJN-USLFZFAMSA-N	SCOPOLAMINE	P11229	Muscarinic acetylcholine receptor M1	Known	9.1	---	---	---
STECJAGHUSJQJN-MKXJHAPZSA-N	SCOPOLAMINE	P20309	Muscarinic acetylcholine receptor M3	Known	9.1	---	---	---
STECJAGHUSJQJN-YXPYLGEYSA-N	SCOPOLAMINE	P11229	Muscarinic acetylcholine receptor M1	Known	9.1	---	---	---
STECJAGHUSJQJN-OYVHKFOJSA-N	SCOPOLAMINE	P20309	Muscarinic acetylcholine receptor M3	Known	9.1	---	---	---
STECJAGHUSJQJN-QBMZJCKTSA-N	ATROSCINE	P11229	Muscarinic acetylcholine receptor M1	Known	9.1	---	---	---
ANJTVLIZGCUXLD-RKDXNWHRSA-N	CYTISINE	P43681	Neuronal acetylcholine receptor subunit alpha-4	Known	9.1	---	---	---
PFNFFQXMRSDOHW-UHFFFAOYSA-N	SPERMINE	P63252	Inward rectifier potassium channel 2	Known	9.1	---	---	---
NQWVSMVXKMHKTF-JKSUJKDBSA-N	ARCTIGENIN|(-)-ARCTIGENIN	Q02750	Dual specificity mitogen-activated protein kinase kinase 1	Known	9.0	---	---	---
NQWVSMVXKMHKTF-UHFFFAOYSA-N	ARCTIGENIN|(-)-ARCTIGENIN	Q02750	Dual specificity mitogen-activated protein kinase kinase 1	Known	9.0	---	---	---
RKUNBYITZUJHSG-QKPAOTATSA-N	HYOSCYAMINE	P08172	Muscarinic acetylcholine receptor M2	Known	9.0	---	---	---
GMVPRGQOIOIIMI-DWKJAMRDSA-N	PROSTAGLANDIN-E-1	P43115	Prostaglandin E2 receptor EP3 subtype	Known	9.0	---	---	---
RKUNBYITZUJHSG-UHFFFAOYSA-N	ATROPINE|HYOSCYAMINE|L-HYOSCYAMINE	P08172	Muscarinic acetylcholine receptor M2	Known	9.0	---	---	---
RKUNBYITZUJHSG-JJXSEGSLSA-N	ATROPINE	P08172	Muscarinic acetylcholine receptor M2	Known	9.0	---	---	---
MECHNRXZTMCUDQ-RKHKHRCZSA-N	ERGOSTEROL	P10275	Androgen receptor	Known	9.0	---	---	---
FTVWIRXFELQLPI-UHFFFAOYSA-N	NARINGENIN	P11511	Aromatase	Known	9.0	---	---	---
FTVWIRXFELQLPI-CYBMUJFWSA-N	(+)-NARINGENIN	P11511	Aromatase	Known	9.0	---	---	---
XEYBRNLFEZDVAW-ARSRFYASSA-N	PROSTAGLANDIN-E-2	P43115	Prostaglandin E2 receptor EP3 subtype	Known	8.9	---	---	---
ANJTVLIZGCUXLD-RKDXNWHRSA-N	CYTISINE	Q15822	Neuronal acetylcholine receptor subunit alpha-2	Known	8.9	---	---	---
RKUNBYITZUJHSG-AUSYRVNMSA-N	ATROPINE|HYOSCYAMINE	P08912	Muscarinic acetylcholine receptor M5	Known	8.8	---	---	---
STECJAGHUSJQJN-UHFFFAOYSA-N	SCOPOLAMINE|ATROSCINE	P08172	Muscarinic acetylcholine receptor M2	Known	8.8	---	---	---
RKUNBYITZUJHSG-PJPHBNEVSA-N	ATROPINE|HYOSCYAMINE	P08912	Muscarinic acetylcholine receptor M5	Known	8.8	---	---	---
RKUNBYITZUJHSG-PJPHBNEVSA-N	ATROPINE|HYOSCYAMINE	P20309	Muscarinic acetylcholine receptor M3	Known	8.8	---	---	---
RKUNBYITZUJHSG-LGGPCSOHSA-N	ATROPINE|HYOSCYAMINE|L-HYOSCYAMINE	P08912	Muscarinic acetylcholine receptor M5	Known	8.8	---	---	---
STECJAGHUSJQJN-FWXGHANASA-N	HYOSCINE	P08172	Muscarinic acetylcholine receptor M2	Known	8.8	---	---	---
GMVPRGQOIOIIMI-OUKQBFOZSA-N	PROSTAGLANDIN-E-1	P43115	Prostaglandin E2 receptor EP3 subtype	Known	8.8	---	---	---
ONBWJWYUHXVEJS-ZTYRTETDSA-N	NORMORPHINE	P35372	Mu-type opioid receptor	Known	8.8	---	---	---
RKUNBYITZUJHSG-LGGPCSOHSA-N	ATROPINE|HYOSCYAMINE|L-HYOSCYAMINE	P11229	Muscarinic acetylcholine receptor M1	Known	8.8	---	---	---
RKUNBYITZUJHSG-AUSYRVNMSA-N	ATROPINE|HYOSCYAMINE	P20309	Muscarinic acetylcholine receptor M3	Known	8.8	---	---	---
RKUNBYITZUJHSG-PJPHBNEVSA-N	ATROPINE|HYOSCYAMINE	P11229	Muscarinic acetylcholine receptor M1	Known	8.8	---	---	---
RKUNBYITZUJHSG-LGGPCSOHSA-N	ATROPINE|HYOSCYAMINE|L-HYOSCYAMINE	P20309	Muscarinic acetylcholine receptor M3	Known	8.8	---	---	---
RKUNBYITZUJHSG-AUSYRVNMSA-N	ATROPINE|HYOSCYAMINE	P11229	Muscarinic acetylcholine receptor M1	Known	8.8	---	---	---
QZAYGJVTTNCVMB-UHFFFAOYSA-N	SEROTONIN|5-HYDROXYTRYPTAMINE	P34969	5-hydroxytryptamine receptor 7	Known	8.8	---	---	---
WHWZLSFABNNENI-UHFFFAOYSA-N	FAURINOL	P35367	Histamine H1 receptor	Known	8.8	---	---	---
RKUNBYITZUJHSG-PJPHBNEVSA-N	ATROPINE|HYOSCYAMINE	P08173	Muscarinic acetylcholine receptor M4	Known	8.7	---	---	---
RKUNBYITZUJHSG-LGGPCSOHSA-N	ATROPINE|HYOSCYAMINE|L-HYOSCYAMINE	P08173	Muscarinic acetylcholine receptor M4	Known	8.7	---	---	---
STECJAGHUSJQJN-UHFFFAOYSA-N	SCOPOLAMINE|ATROSCINE	P08912	Muscarinic acetylcholine receptor M5	Known	8.7	---	---	---
STECJAGHUSJQJN-FWXGHANASA-N	HYOSCINE	P08912	Muscarinic acetylcholine receptor M5	Known	8.7	---	---	---
RKUNBYITZUJHSG-AUSYRVNMSA-N	ATROPINE|HYOSCYAMINE	P08173	Muscarinic acetylcholine receptor M4	Known	8.7	---	---	---
PROQIPRRNZUXQM-ZXXIGWHRSA-N	ESTRIOL	P03372	Estrogen receptor	Known	8.7	---	---	---
LCAWNFIFMLXZPQ-UHFFFAOYSA-N	4',7-DIHYDROXYFLAVONE|7,4'-DIHYDROXYFLAVONE	P11511	Aromatase	Known	8.7	---	---	---
NQWVSMVXKMHKTF-UHFFFAOYSA-N	ARCTIGENIN|(-)-ARCTIGENIN	P33261	Cytochrome P450 2C19	Known	8.6	---	---	---
NQWVSMVXKMHKTF-JKSUJKDBSA-N	ARCTIGENIN|(-)-ARCTIGENIN	P33261	Cytochrome P450 2C19	Known	8.6	---	---	---
PROQIPRRNZUXQM-ZMSHIADSSA-N	ESTRIOL	Q92731	Estrogen receptor beta	Known	8.6	---	---	---
RKUNBYITZUJHSG-VFSICIBPSA-N	ATROPINE|HYOSCYAMINE|L-HYOSCYAMINE	P08172	Muscarinic acetylcholine receptor M2	Known	8.6	---	---	---
STECJAGHUSJQJN-OYVHKFOJSA-N	SCOPOLAMINE	P08172	Muscarinic acetylcholine receptor M2	Known	8.6	---	---	---
STECJAGHUSJQJN-YXPYLGEYSA-N	SCOPOLAMINE	P08172	Muscarinic acetylcholine receptor M2	Known	8.6	---	---	---
STECJAGHUSJQJN-QBMZJCKTSA-N	ATROSCINE	P08172	Muscarinic acetylcholine receptor M2	Known	8.6	---	---	---
STECJAGHUSJQJN-PMFPHFEJSA-N	SCOPOLAMINE	P08172	Muscarinic acetylcholine receptor M2	Known	8.6	---	---	---
STECJAGHUSJQJN-MKXJHAPZSA-N	SCOPOLAMINE	P08172	Muscarinic acetylcholine receptor M2	Known	8.6	---	---	---
STECJAGHUSJQJN-USLFZFAMSA-N	SCOPOLAMINE	P08172	Muscarinic acetylcholine receptor M2	Known	8.6	---	---	---
STECJAGHUSJQJN-YOHVKPHQSA-N	SCOPOLAMINE	P08172	Muscarinic acetylcholine receptor M2	Known	8.6	---	---	---
AEQDJSLRWYMAQI-KRWDZBQOSA-N	TETRAHYDROPALMATINE	Q99720	Sigma non-opioid intracellular receptor 1	Known	8.6	---	---	---
OIRDTQYFTABQOQ-SXVXDFOESA-N	ADENOSINE	P17612	cAMP-dependent protein kinase catalytic subunit alpha	Known	8.6	---	---	---
LUKBXSAWLPMMSZ-UPHRSURJSA-N	RESVERATROL|CIS-RESVERATROL	P33261	Cytochrome P450 2C19	Known	8.6	---	---	---
RJKFOVLPORLFTN-STHVQZNPSA-N	PROGESTERONE	P06401	Progesterone receptor	Known	8.5	---	---	---
RJKFOVLPORLFTN-LEKSSAKUSA-N	PROGESTERONE	P06401	Progesterone receptor	Known	8.5	---	---	---
RKUNBYITZUJHSG-AUSYRVNMSA-N	ATROPINE|HYOSCYAMINE	P08172	Muscarinic acetylcholine receptor M2	Known	8.5	---	---	---
RKUNBYITZUJHSG-LGGPCSOHSA-N	ATROPINE|HYOSCYAMINE|L-HYOSCYAMINE	P08172	Muscarinic acetylcholine receptor M2	Known	8.5	---	---	---
RKUNBYITZUJHSG-PJPHBNEVSA-N	ATROPINE|HYOSCYAMINE	P08172	Muscarinic acetylcholine receptor M2	Known	8.5	---	---	---
XEYBRNLFEZDVAW-RTYMFESYSA-N	PROSTAGLANDIN-E-2	P43115	Prostaglandin E2 receptor EP3 subtype	Known	8.5	---	---	---
QZAYGJVTTNCVMB-UHFFFAOYSA-N	SEROTONIN|5-HYDROXYTRYPTAMINE	P08908	5-hydroxytryptamine receptor 1A	Known	8.5	---	---	---
DBPWSSGDRRHUNT-CEGNMAFCSA-N	17-ALPHA-HYDROXYPROGESTERONE|17-HYDROXYPROGESTERONE	P06401	Progesterone receptor	Known	8.4	---	---	---
VOXZDWNPVJITMN-QXDIGNSFSA-N	17-ALPHA-ESTRADIOL	P03372	Estrogen receptor	Known	8.4	---	---	---
STECJAGHUSJQJN-PMFPHFEJSA-N	SCOPOLAMINE	P08912	Muscarinic acetylcholine receptor M5	Known	8.4	---	---	---
STECJAGHUSJQJN-YOHVKPHQSA-N	SCOPOLAMINE	P08912	Muscarinic acetylcholine receptor M5	Known	8.4	---	---	---
STECJAGHUSJQJN-OYVHKFOJSA-N	SCOPOLAMINE	P08912	Muscarinic acetylcholine receptor M5	Known	8.4	---	---	---
STECJAGHUSJQJN-QBMZJCKTSA-N	ATROSCINE	P08912	Muscarinic acetylcholine receptor M5	Known	8.4	---	---	---
STECJAGHUSJQJN-MKXJHAPZSA-N	SCOPOLAMINE	P08912	Muscarinic acetylcholine receptor M5	Known	8.4	---	---	---
UQCNKQCJZOAFTQ-ISWURRPUSA-N	OXYMORPHINE	P35372	Mu-type opioid receptor	Known	8.4	---	---	---
STECJAGHUSJQJN-USLFZFAMSA-N	SCOPOLAMINE	P08912	Muscarinic acetylcholine receptor M5	Known	8.4	---	---	---
STECJAGHUSJQJN-YXPYLGEYSA-N	SCOPOLAMINE	P08912	Muscarinic acetylcholine receptor M5	Known	8.4	---	---	---
QZAYGJVTTNCVMB-UHFFFAOYSA-N	SEROTONIN|5-HYDROXYTRYPTAMINE	P28221	5-hydroxytryptamine receptor 1D	Known	8.4	---	---	---
VMWNQDUVQKEIOC-CYBMUJFWSA-N	APOMORPHINE	P21917	D(4) dopamine receptor	Known	8.4	---	---	---
YNNUSGIPVFPVBX-NHCUHLMSSA-N	CLEMATINE	P35462	D(3) dopamine receptor	Known	8.4	---	---	---
OVSQVDMCBVZWGM-IDRAQACASA-N	HIRSUTRIN	P18825	Alpha-2C adrenergic receptor	Known	8.4	---	---	---
OVSQVDMCBVZWGM-UHFFFAOYSA-N	HYPERIN|QUERCETIN-3-O-GALACTOSIDE|ISOQUERCITRIN|HYPEROSIDE	P18825	Alpha-2C adrenergic receptor	Known	8.4	---	---	---
OVSQVDMCBVZWGM-SJWGPRHPSA-N	HYPERIN	P18825	Alpha-2C adrenergic receptor	Known	8.4	---	---	---
JKPISQIIWUONPB-UHFFFAOYSA-N	STEPHOLIDINE	P21918	D(1B) dopamine receptor	Known	8.4	---	---	---
JKPISQIIWUONPB-HNNXBMFYSA-N	STEPHOLIDINE	P21918	D(1B) dopamine receptor	Known	8.4	---	---	---
QEVHRUUCFGRFIF-MDEJGZGSSA-N	RESERPINE	Q05940	Synaptic vesicular amine transporter	Known	8.4	---	---	---
KDFKJOFJHSVROC-INIZCTEOSA-N	(-)-ISOCORYPALMINE|ISOCORYPALMINE|TETRAHYDROCOLUMBAMINE	P21728	D(1A) dopamine receptor	Known	8.3	---	---	---
KDFKJOFJHSVROC-UHFFFAOYSA-N	TETRAHYDROCOLUMBAMINE|ISOCORYPALMINE	P21728	D(1A) dopamine receptor	Known	8.3	---	---	---
LZJRNLRASBVRRX-UHFFFAOYSA-N	BOLDINE	P35348	Alpha-1A adrenergic receptor	Known	8.3	---	---	---
LZJRNLRASBVRRX-ZDUSSCGKSA-N	(+)-BOLDINE|BOLDINE|BOLDIN	P35348	Alpha-1A adrenergic receptor	Known	8.3	---	---	---
MUMGGOZAMZWBJJ-DYKIIFRCSA-N	TESTOSTERONE	P10275	Androgen receptor	Known	8.3	---	---	---
SNICXCGAKADSCV-UHFFFAOYSA-N	NICOTINE	P43681	Neuronal acetylcholine receptor subunit alpha-4	Known	8.3	---	---	---
AYMYWHCQALZEGT-ORCRQEGFSA-N	BUTEIN	P09917	Arachidonate 5-lipoxygenase	Known	8.3	---	---	---
VOXZDWNPVJITMN-QXDIGNSFSA-N	17-ALPHA-ESTRADIOL	Q92731	Estrogen receptor beta	Known	8.2	---	---	---
ZZIALNLLNHEQPJ-UHFFFAOYSA-N	COUMESTROL	Q92731	Estrogen receptor beta	Known	8.2	---	---	---
JKPISQIIWUONPB-UHFFFAOYSA-N	STEPHOLIDINE	P21728	D(1A) dopamine receptor	Known	8.2	---	---	---
QZAYGJVTTNCVMB-UHFFFAOYSA-N	SEROTONIN|5-HYDROXYTRYPTAMINE	P28222	5-hydroxytryptamine receptor 1B	Known	8.2	---	---	---
JKPISQIIWUONPB-HNNXBMFYSA-N	STEPHOLIDINE	P21728	D(1A) dopamine receptor	Known	8.2	---	---	---
WQMLFJWIKARBFW-ROAUBKGHSA-N	DIGIPROSIDE	P05023	Sodium/potassium-transporting ATPase subunit alpha-1	Known	8.2	---	---	---
NQOMDNMTNVQXRR-GHYFHNAUSA-N	EVATROMONOSIDE	P05023	Sodium/potassium-transporting ATPase subunit alpha-1	Known	8.2	---	---	---
CULUKMPMGVXCEI-NXEZZACHSA-N	(-)-N-METHYLCYTISINE	P43681	Neuronal acetylcholine receptor subunit alpha-4	Known	8.2	---	---	---
RJKFOVLPORLFTN-STHVQZNPSA-N	PROGESTERONE	P08235	Mineralocorticoid receptor	Known	8.2	---	---	---
RJKFOVLPORLFTN-LEKSSAKUSA-N	PROGESTERONE	P08235	Mineralocorticoid receptor	Known	8.2	---	---	---
YNNUSGIPVFPVBX-NHCUHLMSSA-N	CLEMATINE	P08912	Muscarinic acetylcholine receptor M5	Known	8.2	---	---	---
OFEZSBMBBKLLBJ-BAJZRUMYSA-N	CORDYCEPIN	P30542	Adenosine receptor A1	Known	8.2	---	---	---
ZITBJWXLODLDRH-JLTOFOAXSA-N	(+)-WIKSTROMOL	P14416	D(2) dopamine receptor	Known	8.1	---	---	---
XEYBRNLFEZDVAW-ARSRFYASSA-N	PROSTAGLANDIN-E-2	P43116	Prostaglandin E2 receptor EP2 subtype	Known	8.1	---	---	---
BQJCRHHNABKAKU-KBQPJGBKSA-N	MORPHINE	P35372	Mu-type opioid receptor	Known	8.1	---	---	---
VMWNQDUVQKEIOC-CYBMUJFWSA-N	APOMORPHINE	P21918	D(1B) dopamine receptor	Known	8.1	---	---	---
YNNUSGIPVFPVBX-NHCUHLMSSA-N	CLEMATINE	P08173	Muscarinic acetylcholine receptor M4	Known	8.1	---	---	---
WDJUZGPOPHTGOT-CNIDYCFQSA-N	DIGITOXIN	P05023	Sodium/potassium-transporting ATPase subunit alpha-1	Known	8.1	---	---	---
WDJUZGPOPHTGOT-VEBSLOLJSA-N	DIGITOXIN	P05023	Sodium/potassium-transporting ATPase subunit alpha-1	Known	8.1	---	---	---
WDJUZGPOPHTGOT-UHFFFAOYSA-N	DIGITOXIN	P05023	Sodium/potassium-transporting ATPase subunit alpha-1	Known	8.1	---	---	---
ATHGHQPFGPMSJY-UHFFFAOYSA-N	SPERMIDINE	P63252	Inward rectifier potassium channel 2	Known	8.1	---	---	---
HCZKYJDFEPMADG-VXGBXAGGSA-N	NORDIHYDROGUAIARETIC-ACID	P11511	Aromatase	Known	8.0	---	---	---
HCZKYJDFEPMADG-UHFFFAOYSA-N	NORDIHYDROGUAIARETIC-ACID	P11511	Aromatase	Known	8.0	---	---	---
JUVIOZPCNVVQFO-HBGVWJBISA-N	ROTENONE	P03886	NADH-ubiquinone oxidoreductase chain 1	Known	8.0	---	---	---
HCZKYJDFEPMADG-TXEJJXNPSA-N	NORDIHYDROGUAIARETIC-ACID	P11511	Aromatase	Known	8.0	---	---	---
XEYBRNLFEZDVAW-RTYMFESYSA-N	PROSTAGLANDIN-E-2	P43116	Prostaglandin E2 receptor EP2 subtype	Known	8.0	---	---	---
QZAYGJVTTNCVMB-UHFFFAOYSA-N	SEROTONIN|5-HYDROXYTRYPTAMINE	P41595	5-hydroxytryptamine receptor 2B	Known	8.0	---	---	---
YUSWMAULDXZHPY-UHFFFAOYSA-N	AMENTOFLAVONE|BIAPIGENIN	P18507	Gamma-aminobutyric acid receptor subunit gamma-2	Known	8.0	---	---	---
YUSWMAULDXZHPY-UHFFFAOYSA-N	AMENTOFLAVONE|BIAPIGENIN	P14867	Gamma-aminobutyric acid receptor subunit alpha-1	Known	8.0	---	---	---
YUSWMAULDXZHPY-UHFFFAOYSA-N	AMENTOFLAVONE|BIAPIGENIN	P47870	Gamma-aminobutyric acid receptor subunit beta-2	Known	8.0	---	---	---
OIPILFWXSMYKGL-UHFFFAOYSA-N	CHOLINE	Q15822	Neuronal acetylcholine receptor subunit alpha-2	Known	8.0	---	---	---
JPUKWEQWGBDDQB-QSOFNFLRSA-N	ASRAGALIN|KAEMPFEROL-3-O-BETA-D-GLUCOSIDE|KAEMPFEROL-3-O-GLUCOSIDE|ASTRAGALIN|KAEMPFEROL-3-0-GLUCOSIDE	P22303	Acetylcholinesterase	Known	7.9	---	---	---
JPUKWEQWGBDDQB-DHTVHLPASA-N	KAEMPFEROL-3-0-GALACTOSIDE	P22303	Acetylcholinesterase	Known	7.9	---	---	---
JPUKWEQWGBDDQB-DTGCRPNFSA-N	TRIFOLIN	P22303	Acetylcholinesterase	Known	7.9	---	---	---
JPUKWEQWGBDDQB-ZVIPYZFUSA-N	KAEMPFEROL-3-0-GLUCOSIDE|KAEMPFEROL-3-O-BETA-D-GLUCOSIDE|KAEMPFEROL-3-BETA-D-GLUCOSIDE	P22303	Acetylcholinesterase	Known	7.9	---	---	---
JPUKWEQWGBDDQB-QVHTVSSGSA-N	TRIFOLIN	P22303	Acetylcholinesterase	Known	7.9	---	---	---
JPUKWEQWGBDDQB-LVIXBQNQSA-N	KAEMPFEROL-3-0-GLUCOSIDE	P22303	Acetylcholinesterase	Known	7.9	---	---	---
JPUKWEQWGBDDQB-HBDJNLTOSA-N	TRIFOLIN	P22303	Acetylcholinesterase	Known	7.9	---	---	---
ONBWJWYUHXVEJS-YTPBOXJFSA-N	NORMORPHINE	P35372	Mu-type opioid receptor	Known	7.9	---	---	---
PROQIPRRNZUXQM-ZMSHIADSSA-N	ESTRIOL	P03372	Estrogen receptor	Known	7.9	---	---	---
VMWNQDUVQKEIOC-CYBMUJFWSA-N	APOMORPHINE	P35462	D(3) dopamine receptor	Known	7.9	---	---	---
SNICXCGAKADSCV-JTQLQIEISA-N	NICOTINE	P43681	Neuronal acetylcholine receptor subunit alpha-4	Known	7.9	---	---	---
VYFYYTLLBUKUHU-UHFFFAOYSA-N	DOPAMINE	P21917	D(4) dopamine receptor	Known	7.9	---	---	---
NTYJJOPFIAHURM-UHFFFAOYSA-N	HISTAMINE	Q9Y5N1	Histamine H3 receptor	Known	7.9	---	---	---
REFJWTPEDVJJIY-UHFFFAOYSA-N	QUERCETIN|QUERCETOL	P11511	Aromatase	Known	7.9	---	---	---
RERZNCLIYCABFS-UHFFFAOYSA-N	HARMALINE	P21397	Amine oxidase [flavin-containing] A	Known	7.9	---	---	---
ONBWJWYUHXVEJS-ZTYRTETDSA-N	NORMORPHINE	P41145	Kappa-type opioid receptor	Known	7.8	---	---	---
GMVPRGQOIOIIMI-OUKQBFOZSA-N	PROSTAGLANDIN-E-1	P43116	Prostaglandin E2 receptor EP2 subtype	Known	7.8	---	---	---
ONBWJWYUHXVEJS-YTPBOXJFSA-N	NORMORPHINE	P41145	Kappa-type opioid receptor	Known	7.8	---	---	---
ONBWJWYUHXVEJS-UHFFFAOYSA-N	NORMORPHINE	P41145	Kappa-type opioid receptor	Known	7.8	---	---	---
MUMGGOZAMZWBJJ-KZYORJDKSA-N	EPITESTOSTERONE	P10275	Androgen receptor	Known	7.8	---	---	---
SNICXCGAKADSCV-JTQLQIEISA-N	NICOTINE	Q15822	Neuronal acetylcholine receptor subunit alpha-2	Known	7.8	---	---	---
MPDGHEJMBKOTSU-HDCNTZMNSA-N	18-BETA-GLYCYRRHETINIC-ACID	P28845	Corticosteroid 11-beta-dehydrogenase isozyme 1	Known	7.8	---	---	---
MPDGHEJMBKOTSU-JNYFVOPZSA-N	18-ALPHA-GLYCYRRHETINIC-ACID	P28845	Corticosteroid 11-beta-dehydrogenase isozyme 1	Known	7.8	---	---	---
MPDGHEJMBKOTSU-PMTKVOBESA-N	BETA-GLYCYRRHETINIC-ACID	P28845	Corticosteroid 11-beta-dehydrogenase isozyme 1	Known	7.8	---	---	---
MPDGHEJMBKOTSU-WFJWTYAKSA-N	URALENIC-ACID	P28845	Corticosteroid 11-beta-dehydrogenase isozyme 1	Known	7.8	---	---	---
MPDGHEJMBKOTSU-UHFFFAOYSA-N	URALENIC-ACID	P28845	Corticosteroid 11-beta-dehydrogenase isozyme 1	Known	7.8	---	---	---
MPDGHEJMBKOTSU-YKLVYJNSSA-N	GLYCYRRHETINIC-ACID|URALENIC-ACID	P28845	Corticosteroid 11-beta-dehydrogenase isozyme 1	Known	7.8	---	---	---
YNNUSGIPVFPVBX-NHCUHLMSSA-N	CLEMATINE	P28223	5-hydroxytryptamine receptor 2A	Known	7.8	---	---	---
YNNUSGIPVFPVBX-NHCUHLMSSA-N	CLEMATINE	P20309	Muscarinic acetylcholine receptor M3	Known	7.8	---	---	---
UDMBCSSLTHHNCD-KQYNXXCUSA-N	ADENYLIC-ACID	P0DMS8	Adenosine receptor A3	Known	7.8	---	---	---
BXNJHAXVSOCGBA-UHFFFAOYSA-N	HARMINE	P21397	Amine oxidase [flavin-containing] A	Known	7.8	---	---	---
QAIPRVGONGVQAS-DUXPYHPUSA-N	CAFFEIC-ACID|TRANS-CAFFEIC-ACID|DIHYDROXYCINNAMIC-ACID|3,4-DIHYDROXYCINNAMIC-ACID	P14780	Matrix metalloproteinase-9	Known	7.8	---	---	---
QAIPRVGONGVQAS-RQOWECAXSA-N	CIS-CAFFEIC-ACID	P14780	Matrix metalloproteinase-9	Known	7.8	---	---	---
DNXHEGUUPJUMQT-CBZIJGRNSA-N	ESTRONE|OESTRONE	P03372	Estrogen receptor	Known	7.7	---	---	---
OIRDTQYFTABQOQ-SXVXDFOESA-N	ADENOSINE	P30542	Adenosine receptor A1	Known	7.7	---	---	---
QZAYGJVTTNCVMB-UHFFFAOYSA-N	SEROTONIN|5-HYDROXYTRYPTAMINE	P30939	5-hydroxytryptamine receptor 1F	Known	7.7	---	---	---
CYQFCXCEBYINGO-UHFFFAOYSA-N	DELTA-9-TETRAHYDROCANNABINOL|TETRAHYDROCANNABINOL	P34972	Cannabinoid receptor 2	Known	7.7	---	---	---
CYQFCXCEBYINGO-DLBZAZTESA-N	DRONABINOL	P34972	Cannabinoid receptor 2	Known	7.7	---	---	---
KNWVMRVOBAFFMH-HNNXBMFYSA-N	SCOULERINE|(-)-SCOULERINE	P21728	D(1A) dopamine receptor	Known	7.7	---	---	---
GMVPRGQOIOIIMI-DWKJAMRDSA-N	PROSTAGLANDIN-E-1	P43116	Prostaglandin E2 receptor EP2 subtype	Known	7.7	---	---	---
MYKUKUCHPMASKF-SECBINFHSA-N	NORNICOTINE|(+)-NORNICOTINE	Q15822	Neuronal acetylcholine receptor subunit alpha-2	Known	7.7	---	---	---
MYKUKUCHPMASKF-VIFPVBQESA-N	NORNICOTINE	Q15822	Neuronal acetylcholine receptor subunit alpha-2	Known	7.7	---	---	---
DBPWSSGDRRHUNT-CEGNMAFCSA-N	17-ALPHA-HYDROXYPROGESTERONE|17-HYDROXYPROGESTERONE	P08185	Corticosteroid-binding globulin	Known	7.7	---	---	---
YNNUSGIPVFPVBX-NHCUHLMSSA-N	CLEMATINE	Q99720	Sigma non-opioid intracellular receptor 1	Known	7.7	---	---	---
BQJCRHHNABKAKU-KBQPJGBKSA-N	MORPHINE	P21918	D(1B) dopamine receptor	Known	7.6	---	---	---
CYQFCXCEBYINGO-IRXDYDNUSA-N	DELTA-1-TETRAHYDROCANNABINOL|TETRAHYDROCANNABINOL	P34972	Cannabinoid receptor 2	Known	7.6	---	---	---
OIRDTQYFTABQOQ-SXVXDFOESA-N	ADENOSINE	P0DMS8	Adenosine receptor A3	Known	7.6	---	---	---
CYQFCXCEBYINGO-IAGOWNOFSA-N	DELTA-1-TETRAHYDROCANNABINOL|TETRAHYDROCANNABINOL	P34972	Cannabinoid receptor 2	Known	7.6	---	---	---
CULUKMPMGVXCEI-ZJUUUORDSA-N	N-METHYL-CYTISINE	P43681	Neuronal acetylcholine receptor subunit alpha-4	Known	7.6	---	---	---
TZBJGXHYKVUXJN-UHFFFAOYSA-N	1,3,7-TRIHYDROXYXANTHONE|GENISTEIN	Q92731	Estrogen receptor beta	Known	7.6	---	---	---
OIRDTQYFTABQOQ-SXVXDFOESA-N	ADENOSINE	P29274	Adenosine receptor A2a	Known	7.6	---	---	---
QZAYGJVTTNCVMB-UHFFFAOYSA-N	SEROTONIN|5-HYDROXYTRYPTAMINE	P28335	5-hydroxytryptamine receptor 2C	Known	7.6	---	---	---
OFEZSBMBBKLLBJ-BAJZRUMYSA-N	CORDYCEPIN	P29274	Adenosine receptor A2a	Known	7.6	---	---	---
YNNUSGIPVFPVBX-NHCUHLMSSA-N	CLEMATINE	P25100	Alpha-1D adrenergic receptor	Known	7.6	---	---	---
VYFYYTLLBUKUHU-UHFFFAOYSA-N	DOPAMINE	P35462	D(3) dopamine receptor	Known	7.6	---	---	---
AUVVAXYIELKVAI-NKAAHPCGSA-N	EMETINE	P08913	Alpha-2A adrenergic receptor	Known	7.6	---	---	---
NTYJJOPFIAHURM-UHFFFAOYSA-N	HISTAMINE	Q9H3N8	Histamine H4 receptor	Known	7.6	---	---	---
BQJCRHHNABKAKU-KBQPJGBKSA-N	MORPHINE	P21728	D(1A) dopamine receptor	Known	7.6	---	---	---
BQJCRHHNABKAKU-KBQPJGBKSA-N	MORPHINE	P21917	D(4) dopamine receptor	Known	7.6	---	---	---
BQJCRHHNABKAKU-KBQPJGBKSA-N	MORPHINE	P14416	D(2) dopamine receptor	Known	7.6	---	---	---
BQJCRHHNABKAKU-KBQPJGBKSA-N	MORPHINE	P35462	D(3) dopamine receptor	Known	7.6	---	---	---
QXKHYNVANLEOEG-UHFFFAOYSA-N	XANTHOTOXIN	P05177	Cytochrome P450 1A2	Known	7.6	---	---	---
QAIPRVGONGVQAS-DUXPYHPUSA-N	CAFFEIC-ACID|TRANS-CAFFEIC-ACID|DIHYDROXYCINNAMIC-ACID|3,4-DIHYDROXYCINNAMIC-ACID	P08253	72 kDa type IV collagenase	Known	7.6	---	---	---
QAIPRVGONGVQAS-RQOWECAXSA-N	CIS-CAFFEIC-ACID	P08253	72 kDa type IV collagenase	Known	7.6	---	---	---
BXNJHAXVSOCGBA-UHFFFAOYSA-N	HARMINE	P49759	Dual specificity protein kinase CLK1	Known	7.6	---	---	---
QHGUCRYDKWKLMG-UHFFFAOYSA-N	OCTOPAMINE	P46098	5-hydroxytryptamine receptor 3A	Known	7.6	---	---	---
QHGUCRYDKWKLMG-MRVPVSSYSA-N	OCTOPAMINE	P46098	5-hydroxytryptamine receptor 3A	Known	7.6	---	---	---
QHGUCRYDKWKLMG-QMMMGPOBSA-N	OCTOPAMINE	P46098	5-hydroxytryptamine receptor 3A	Known	7.6	---	---	---
LLEJIEBFSOEYIV-UHFFFAOYSA-N	CHELERYTHRINE	Q02156	Protein kinase C epsilon type	Known	7.6	---	---	---
IKGXIBQEEMLURG-NVPNHPEKSA-N	QUERCITIN-3-0-BETA-D-GLUCOSIDE|QUERCETIN-3-RHAMNOGLUCOSIDE|VIOLAQUERCITRIN|QUERCETIN-3-O-RUTINOSIDE|RUTOSIDE|RUTIN|QUERCITIN-3-0-RHAMNOGLUCOSIDE	P08912	Muscarinic acetylcholine receptor M5	Known	7.5	---	---	---
IKGXIBQEEMLURG-FNKLJWKFSA-N	RUTIN	P08912	Muscarinic acetylcholine receptor M5	Known	7.5	---	---	---
IKGXIBQEEMLURG-BKUODXTLSA-N	RUTOSIDE	P08912	Muscarinic acetylcholine receptor M5	Known	7.5	---	---	---
IKGXIBQEEMLURG-JFNZIVIESA-N	RUTOSIDE|QUERCETIN-3-RHAMNOGLUCOSIDE|VIOLAQUERCITRIN|QUERCETIN-3-O-RUTINOSIDE	P08912	Muscarinic acetylcholine receptor M5	Known	7.5	---	---	---
IKGXIBQEEMLURG-UHFFFAOYSA-N	RUTOSIDE|QUERCETIN-3-RHAMNOGLUCOSIDE|VIOLAQUERCITRIN	P08912	Muscarinic acetylcholine receptor M5	Known	7.5	---	---	---
DNXHEGUUPJUMQT-CBZIJGRNSA-N	ESTRONE|OESTRONE	Q92731	Estrogen receptor beta	Known	7.5	---	---	---
VOXZDWNPVJITMN-SFFUCWETSA-N	ESTRADIOL	P03372	Estrogen receptor	Known	7.5	---	---	---
VMWNQDUVQKEIOC-CYBMUJFWSA-N	APOMORPHINE	P14416	D(2) dopamine receptor	Known	7.5	---	---	---
DBPWSSGDRRHUNT-CEGNMAFCSA-N	17-ALPHA-HYDROXYPROGESTERONE|17-HYDROXYPROGESTERONE	P04150	Glucocorticoid receptor	Known	7.5	---	---	---
APJYDQYYACXCRM-UHFFFAOYSA-N	TRYPTAMINE	P34969	5-hydroxytryptamine receptor 7	Known	7.5	---	---	---
MYKUKUCHPMASKF-SECBINFHSA-N	NORNICOTINE|(+)-NORNICOTINE	P43681	Neuronal acetylcholine receptor subunit alpha-4	Known	7.5	---	---	---
MYKUKUCHPMASKF-VIFPVBQESA-N	NORNICOTINE	P43681	Neuronal acetylcholine receptor subunit alpha-4	Known	7.5	---	---	---
YNNUSGIPVFPVBX-NHCUHLMSSA-N	CLEMATINE	P41595	5-hydroxytryptamine receptor 2B	Known	7.5	---	---	---
ZZIALNLLNHEQPJ-UHFFFAOYSA-N	COUMESTROL	P03372	Estrogen receptor	Known	7.5	---	---	---
OFEZSBMBBKLLBJ-BAJZRUMYSA-N	CORDYCEPIN	P0DMS8	Adenosine receptor A3	Known	7.5	---	---	---
BQJCRHHNABKAKU-KBQPJGBKSA-N	MORPHINE	Q99720	Sigma non-opioid intracellular receptor 1	Known	7.5	---	---	---
CYQFCXCEBYINGO-IAGOWNOFSA-N	DELTA-1-TETRAHYDROCANNABINOL|TETRAHYDROCANNABINOL	P21554	Cannabinoid receptor 1	Known	7.5	---	---	---
KIGVXRGRNLQNNI-UHFFFAOYSA-N	AXILLARIN	P15121	Aldose reductase	Known	7.5	---	---	---
BTXNYTINYBABQR-UHFFFAOYSA-N	HYPERICIN	P35462	D(3) dopamine receptor	Known	7.5	---	---	---
LCAWNFIFMLXZPQ-UHFFFAOYSA-N	4',7-DIHYDROXYFLAVONE|7,4'-DIHYDROXYFLAVONE	P27338	Amine oxidase [flavin-containing] B	Known	7.5	---	---	---
DDNPCXHBFYJXBJ-UHFFFAOYSA-N	5,7,4'-TRIHYDROXY-3,6-DIMETHOXYFLAVONE	P47989	Xanthine dehydrogenase/oxidase	Known	7.5	---	---	---
LCAWNFIFMLXZPQ-UHFFFAOYSA-N	4',7-DIHYDROXYFLAVONE|7,4'-DIHYDROXYFLAVONE	P21397	Amine oxidase [flavin-containing] A	Known	7.5	---	---	---
JKPISQIIWUONPB-HNNXBMFYSA-N	STEPHOLIDINE	P35462	D(3) dopamine receptor	Known	7.5	---	---	---
JKPISQIIWUONPB-UHFFFAOYSA-N	STEPHOLIDINE	P35462	D(3) dopamine receptor	Known	7.5	---	---	---
KNWVMRVOBAFFMH-UHFFFAOYSA-N	(-)-SCOULERINE	P10635	Cytochrome P450 2D6	Known	7.5	---	---	---
KNWVMRVOBAFFMH-OAHLLOKOSA-N	(-)-SCOULERINE	P10635	Cytochrome P450 2D6	Known	7.5	---	---	---
KNWVMRVOBAFFMH-HNNXBMFYSA-N	SCOULERINE|(-)-SCOULERINE	P10635	Cytochrome P450 2D6	Known	7.5	---	---	---
YUSWMAULDXZHPY-UHFFFAOYSA-N	AMENTOFLAVONE|BIAPIGENIN	P41143	Delta-type opioid receptor	Known	7.4	---	---	---
SNICXCGAKADSCV-UHFFFAOYSA-N	NICOTINE	Q9UK17	Potassium voltage-gated channel subfamily D member 3	Known	7.4	---	---	---
SNICXCGAKADSCV-JTQLQIEISA-N	NICOTINE	Q9UK17	Potassium voltage-gated channel subfamily D member 3	Known	7.4	---	---	---
HCAWPGARWVBULJ-UHFFFAOYSA-N	DELTA-8-TETRAHYDROCANNABINOL|TETRAHYDROCANNABINOL	P34972	Cannabinoid receptor 2	Known	7.4	---	---	---
ZTVIKZXZYLEVOL-UHFFFAOYSA-N	HOMATROPINE	P08173	Muscarinic acetylcholine receptor M4	Known	7.4	---	---	---
ZTVIKZXZYLEVOL-UHFFFAOYSA-N	HOMATROPINE	P11229	Muscarinic acetylcholine receptor M1	Known	7.4	---	---	---
SFLSHLFXELFNJZ-QMMMGPOBSA-N	L-NORADRENALINE|L-NORADRENALIN|NOREPINEPHRINE	P18825	Alpha-2C adrenergic receptor	Known	7.4	---	---	---
SFLSHLFXELFNJZ-QMMMGPOBSA-N	L-NORADRENALINE|L-NORADRENALIN|NOREPINEPHRINE	P18089	Alpha-2B adrenergic receptor	Known	7.4	---	---	---
UWNUJPINKMRKKR-UHFFFAOYSA-N	SIDERITIFLAVONE	P15121	Aldose reductase	Known	7.4	---	---	---
JKPISQIIWUONPB-HNNXBMFYSA-N	STEPHOLIDINE	P14416	D(2) dopamine receptor	Known	7.4	---	---	---
YNNUSGIPVFPVBX-NHCUHLMSSA-N	CLEMATINE	P18825	Alpha-2C adrenergic receptor	Known	7.4	---	---	---
XQYZDYMELSJDRZ-UHFFFAOYSA-N	PAPAVERINE|PAPAVARINE	Q9Y233	cAMP and cAMP-inhibited cGMP 3',5'-cyclic phosphodiesterase 10A	Known	7.4	---	---	---
RJKFOVLPORLFTN-STHVQZNPSA-N	PROGESTERONE	P08185	Corticosteroid-binding globulin	Known	7.4	---	---	---
RJKFOVLPORLFTN-LEKSSAKUSA-N	PROGESTERONE	P08185	Corticosteroid-binding globulin	Known	7.4	---	---	---
VCCRNZQBSJXYJD-UHFFFAOYSA-N	GALANGIN	P05177	Cytochrome P450 1A2	Known	7.4	---	---	---
CYQFCXCEBYINGO-IRXDYDNUSA-N	DELTA-1-TETRAHYDROCANNABINOL|TETRAHYDROCANNABINOL	P21554	Cannabinoid receptor 1	Known	7.4	---	---	---
AFSDNFLWKVMVRB-UHFFFAOYSA-N	ELLAGIC-ACID	P68400	Casein kinase II subunit alpha	Known	7.4	---	---	---
UQOFGTXDASPNLL-XHNCKOQMSA-N	MUSCARINE	P08912	Muscarinic acetylcholine receptor M5	Known	7.4	---	---	---
VEVZSMAEJFVWIL-UHFFFAOYSA-O	CYANIDIN	P00734	Prothrombin	Known	7.4	---	---	---
ZTVIKZXZYLEVOL-UHFFFAOYSA-N	HOMATROPINE	P08912	Muscarinic acetylcholine receptor M5	Known	7.3	---	---	---
VMWNQDUVQKEIOC-CYBMUJFWSA-N	APOMORPHINE	P18825	Alpha-2C adrenergic receptor	Known	7.3	---	---	---
IOUVKUPGCMBWBT-DARKYYSBSA-N	PHLORIDZIN	P31639	Sodium/glucose cotransporter 2	Known	7.3	---	---	---
YNNUSGIPVFPVBX-NHCUHLMSSA-N	CLEMATINE	P35368	Alpha-1B adrenergic receptor	Known	7.3	---	---	---
CYQFCXCEBYINGO-DLBZAZTESA-N	DRONABINOL	P21554	Cannabinoid receptor 1	Known	7.3	---	---	---
CYQFCXCEBYINGO-UHFFFAOYSA-N	DELTA-9-TETRAHYDROCANNABINOL|TETRAHYDROCANNABINOL	P21554	Cannabinoid receptor 1	Known	7.3	---	---	---
YNNUSGIPVFPVBX-NHCUHLMSSA-N	CLEMATINE	P50406	5-hydroxytryptamine receptor 6	Known	7.3	---	---	---
CDRPUGZCRXZLFL-OWOJBTEDSA-N	PICEATANNOL	Q96L34	MAP/microtubule affinity-regulating kinase 4	Known	7.3	---	---	---
OIRDTQYFTABQOQ-KQYNXXCUSA-N	ADENOSINE	P27487	Dipeptidyl peptidase 4	Known	7.2	---	---	---
IVOMOUWHDPKRLL-PERBPWGJSA-N	3'-5'-CYCLIC-AMP	O60741	Potassium/sodium hyperpolarization-activated cyclic nucleotide-gated channel 1	Known	7.2	---	---	---
OIRDTQYFTABQOQ-SXVXDFOESA-N	ADENOSINE	P27487	Dipeptidyl peptidase 4	Known	7.2	---	---	---
SFLSHLFXELFNJZ-QMMMGPOBSA-N	L-NORADRENALINE|L-NORADRENALIN|NOREPINEPHRINE	P08913	Alpha-2A adrenergic receptor	Known	7.2	---	---	---
VZTUIEROBZXUFA-INIZCTEOSA-N	CANADINE	P21728	D(1A) dopamine receptor	Known	7.2	---	---	---
ZTVIKZXZYLEVOL-UHFFFAOYSA-N	HOMATROPINE	P20309	Muscarinic acetylcholine receptor M3	Known	7.2	---	---	---
RJKFOVLPORLFTN-LEKSSAKUSA-N	PROGESTERONE	P10275	Androgen receptor	Known	7.2	---	---	---
RJKFOVLPORLFTN-STHVQZNPSA-N	PROGESTERONE	P10275	Androgen receptor	Known	7.2	---	---	---
LPEPZZAVFJPLNZ-SFHVURJKSA-N	8-PRENYLNARINGENIN	Q92731	Estrogen receptor beta	Known	7.2	---	---	---
APJYDQYYACXCRM-UHFFFAOYSA-N	TRYPTAMINE	P28221	5-hydroxytryptamine receptor 1D	Known	7.2	---	---	---
VYFYYTLLBUKUHU-UHFFFAOYSA-N	DOPAMINE	P18089	Alpha-2B adrenergic receptor	Known	7.2	---	---	---
VYFYYTLLBUKUHU-UHFFFAOYSA-N	DOPAMINE	P18825	Alpha-2C adrenergic receptor	Known	7.2	---	---	---
VYFYYTLLBUKUHU-UHFFFAOYSA-N	DOPAMINE	P08913	Alpha-2A adrenergic receptor	Known	7.2	---	---	---
VMWNQDUVQKEIOC-CYBMUJFWSA-N	APOMORPHINE	P18089	Alpha-2B adrenergic receptor	Known	7.2	---	---	---
LPEPZZAVFJPLNZ-SFHVURJKSA-N	8-PRENYLNARINGENIN	P03372	Estrogen receptor	Known	7.2	---	---	---
QZAYGJVTTNCVMB-UHFFFAOYSA-N	SEROTONIN|5-HYDROXYTRYPTAMINE	Q13639	5-hydroxytryptamine receptor 4	Known	7.2	---	---	---
IZQSVPBOUDKVDZ-UHFFFAOYSA-N	ISORHAMNETIN|3-METHYLQUERCETIN	P04798	Cytochrome P450 1A1	Known	7.2	---	---	---
UDMBCSSLTHHNCD-KQYNXXCUSA-N	ADENYLIC-ACID	P29274	Adenosine receptor A2a	Known	7.2	---	---	---
AEMFNILZOJDQLW-QAGGRKNESA-N	ANDROSTENEDIONE	P10275	Androgen receptor	Known	7.2	---	---	---
RTIXKCRFFJGDFG-UHFFFAOYSA-N	CHRYSIN	P05177	Cytochrome P450 1A2	Known	7.2	---	---	---
AUVVAXYIELKVAI-NKAAHPCGSA-N	EMETINE	P18825	Alpha-2C adrenergic receptor	Known	7.2	---	---	---
RTIXKCRFFJGDFG-UHFFFAOYSA-N	CHRYSIN	P04798	Cytochrome P450 1A1	Known	7.2	---	---	---
DANYIYRPLHHOCZ-UHFFFAOYSA-N	APIGENIN-4'-METHYL-ETHER|ACACETIN	P05177	Cytochrome P450 1A2	Known	7.2	---	---	---
BTCSSZJGUNDROE-UHFFFAOYSA-N	4-AMINO-BUTYRIC-ACID|GAMMA-AMINOBUTYRIC-ACID	P14867	Gamma-aminobutyric acid receptor subunit alpha-1	Known	7.2	---	---	---
UQOFGTXDASPNLL-XHNCKOQMSA-N	MUSCARINE	P20309	Muscarinic acetylcholine receptor M3	Known	7.2	---	---	---
BTCSSZJGUNDROE-UHFFFAOYSA-N	4-AMINO-BUTYRIC-ACID|GAMMA-AMINOBUTYRIC-ACID	P47870	Gamma-aminobutyric acid receptor subunit beta-2	Known	7.2	---	---	---
VZTUIEROBZXUFA-MRXNPFEDSA-N	CANADINE	P10635	Cytochrome P450 2D6	Known	7.2	---	---	---
VZTUIEROBZXUFA-INIZCTEOSA-N	CANADINE	P10635	Cytochrome P450 2D6	Known	7.2	---	---	---
VZTUIEROBZXUFA-UHFFFAOYSA-N	CANADINE	P10635	Cytochrome P450 2D6	Known	7.2	---	---	---
WYJAPUKIYAZSEM-RTBURBONSA-N	EBURNAMONINE|(-)-EBURNAMONINE	P10635	Cytochrome P450 2D6	Known	7.2	---	---	---
WYJAPUKIYAZSEM-UHFFFAOYSA-N	EBURNAMONINE|(-)-EBURNAMONINE	P10635	Cytochrome P450 2D6	Known	7.2	---	---	---
WYJAPUKIYAZSEM-MOPGFXCFSA-N	EBURNAMONINE|(-)-EBURNAMONINE	P10635	Cytochrome P450 2D6	Known	7.2	---	---	---
WYJAPUKIYAZSEM-RBUKOAKNSA-N	EBURNAMONINE|(-)-EBURNAMONINE	P10635	Cytochrome P450 2D6	Known	7.2	---	---	---
QZAYGJVTTNCVMB-UHFFFAOYSA-N	SEROTONIN|5-HYDROXYTRYPTAMINE	P0DMS8	Adenosine receptor A3	Known	7.1	---	---	---
IQAMTZLKUHMPPE-UHFFFAOYSA-N	3,8''-BIAPIGENIN	P08684	Cytochrome P450 3A4	Known	7.1	---	---	---
BQJCRHHNABKAKU-KBQPJGBKSA-N	MORPHINE	P41145	Kappa-type opioid receptor	Known	7.1	---	---	---
OIRDTQYFTABQOQ-KQYNXXCUSA-N	ADENOSINE	P29274	Adenosine receptor A2a	Known	7.1	---	---	---
ONBWJWYUHXVEJS-YTPBOXJFSA-N	NORMORPHINE	P41143	Delta-type opioid receptor	Known	7.1	---	---	---
JCTYWRARKVGOBK-UHFFFAOYSA-N	APOREINE|ROEMERINE	P14416	D(2) dopamine receptor	Known	7.1	---	---	---
JCTYWRARKVGOBK-AWEZNQCLSA-N	APOREINE|ROEMERINE	P14416	D(2) dopamine receptor	Known	7.1	---	---	---
ONBWJWYUHXVEJS-ZTYRTETDSA-N	NORMORPHINE	P41143	Delta-type opioid receptor	Known	7.1	---	---	---
ONBWJWYUHXVEJS-UHFFFAOYSA-N	NORMORPHINE	P41143	Delta-type opioid receptor	Known	7.1	---	---	---
JCTYWRARKVGOBK-CQSZACIVSA-N	APOREINE|ROEMERINE	P14416	D(2) dopamine receptor	Known	7.1	---	---	---
QZAYGJVTTNCVMB-UHFFFAOYSA-N	SEROTONIN|5-HYDROXYTRYPTAMINE	P50406	5-hydroxytryptamine receptor 6	Known	7.1	---	---	---
YNNUSGIPVFPVBX-NHCUHLMSSA-N	CLEMATINE	P28335	5-hydroxytryptamine receptor 2C	Known	7.1	---	---	---
VCCRNZQBSJXYJD-UHFFFAOYSA-N	GALANGIN	P04798	Cytochrome P450 1A1	Known	7.1	---	---	---
XZTUSOXSLKTKJQ-UHFFFAOYSA-N	DIGITOXIGENIN	P05023	Sodium/potassium-transporting ATPase subunit alpha-1	Known	7.1	---	---	---
XZTUSOXSLKTKJQ-CESUGQOBSA-N	DIGITOXIGENIN	P05023	Sodium/potassium-transporting ATPase subunit alpha-1	Known	7.1	---	---	---
XZTUSOXSLKTKJQ-TWNWRCAFSA-N	DIGITOXIGENIN	P05023	Sodium/potassium-transporting ATPase subunit alpha-1	Known	7.1	---	---	---
YNNUSGIPVFPVBX-NHCUHLMSSA-N	CLEMATINE	P14416	D(2) dopamine receptor	Known	7.1	---	---	---
OYHQOLUKZRVURQ-AVQMFFATSA-N	OCTADECA-9,12-DIENOIC-ACID	Q07869	Peroxisome proliferator-activated receptor alpha	Known	7.1	---	---	---
OYHQOLUKZRVURQ-HZJYTTRNSA-N	ALPHA-LINOLEIC-ACID|LINOLEIC-ACID	Q07869	Peroxisome proliferator-activated receptor alpha	Known	7.1	---	---	---
OYHQOLUKZRVURQ-IXWMQOLASA-N	LINOLEIC-ACID	Q07869	Peroxisome proliferator-activated receptor alpha	Known	7.1	---	---	---
WHUUTDBJXJRKMK-GSVOUGTGSA-N	GLUTAMIC-ACID	Q13224	Glutamate receptor ionotropic, NMDA 2B	Known	7.1	---	---	---
WHUUTDBJXJRKMK-GSVOUGTGSA-N	GLUTAMIC-ACID	Q12879	Glutamate receptor ionotropic, NMDA 2A	Known	7.1	---	---	---
WHUUTDBJXJRKMK-GSVOUGTGSA-N	GLUTAMIC-ACID	Q05586	Glutamate receptor ionotropic, NMDA 1	Known	7.1	---	---	---
DANYIYRPLHHOCZ-UHFFFAOYSA-N	APIGENIN-4'-METHYL-ETHER|ACACETIN	P04798	Cytochrome P450 1A1	Known	7.1	---	---	---
IYRMWMYZSQPJKC-UHFFFAOYSA-N	KAEMPFEROL|TRIFOLITIN	P11712	Cytochrome P450 2C9	Known	7.1	---	---	---
SFVVQRJOGUKCEG-ZRQNBYAXSA-N	LYCOPSAMINE|ECHINATINE|RINDERINE	P32245	Melanocortin receptor 4	Known	7.1	---	---	---
SFVVQRJOGUKCEG-UHFFFAOYSA-N	LYCOPSAMINE|ECHINATINE	P32245	Melanocortin receptor 4	Known	7.1	---	---	---
SFVVQRJOGUKCEG-XTWPYSKKSA-N	LYCOPSAMINE|ECHINATINE	P32245	Melanocortin receptor 4	Known	7.1	---	---	---
SFVVQRJOGUKCEG-RZUNFUDNSA-N	ECHINATINE	P32245	Melanocortin receptor 4	Known	7.1	---	---	---
SFVVQRJOGUKCEG-ZGFBFQLVSA-N	LYCOPSAMINE|ECHINATINE	P32245	Melanocortin receptor 4	Known	7.1	---	---	---
SFVVQRJOGUKCEG-OPQSFPLASA-N	LYCOPSAMINE|INTERMEDINE|ECHINATINE	P32245	Melanocortin receptor 4	Known	7.1	---	---	---
SFVVQRJOGUKCEG-DNVSUFBTSA-N	ECHINATINE	P32245	Melanocortin receptor 4	Known	7.1	---	---	---
UQOFGTXDASPNLL-XHNCKOQMSA-N	MUSCARINE	P08173	Muscarinic acetylcholine receptor M4	Known	7.1	---	---	---
SLSIBLKBHNKZTB-UHFFFAOYSA-N	SKIMMIANINE	P05177	Cytochrome P450 1A2	Known	7.1	---	---	---
ONBWJWYUHXVEJS-UHFFFAOYSA-N	NORMORPHINE	P35372	Mu-type opioid receptor	Known	7.0	---	---	---
KNWVMRVOBAFFMH-UHFFFAOYSA-N	(-)-SCOULERINE	P21728	D(1A) dopamine receptor	Known	7.0	---	---	---
OIRDTQYFTABQOQ-KQYNXXCUSA-N	ADENOSINE	P30542	Adenosine receptor A1	Known	7.0	---	---	---
APJYDQYYACXCRM-UHFFFAOYSA-N	TRYPTAMINE	P28335	5-hydroxytryptamine receptor 2C	Known	7.0	---	---	---
MBMQEIFVQACCCH-QBODLPLBSA-N	ZEARALENONE	Q92731	Estrogen receptor beta	Known	7.0	---	---	---
DTOSIQBPPRVQHS-IUQGRGSQSA-N	ALPHA-LINOLENIC-ACID|DELTA-9,12,15-OCTADECATRIENIC-ACID	Q07869	Peroxisome proliferator-activated receptor alpha	Known	7.0	---	---	---
DTOSIQBPPRVQHS-PDBXOOCHSA-N	ALPHA-LINOLENIC-ACID|LINOLENIC-ACID	Q07869	Peroxisome proliferator-activated receptor alpha	Known	7.0	---	---	---
KDFKJOFJHSVROC-INIZCTEOSA-N	(-)-ISOCORYPALMINE|ISOCORYPALMINE|TETRAHYDROCOLUMBAMINE	P14416	D(2) dopamine receptor	Known	7.0	---	---	---
KDFKJOFJHSVROC-UHFFFAOYSA-N	TETRAHYDROCOLUMBAMINE|ISOCORYPALMINE	P14416	D(2) dopamine receptor	Known	7.0	---	---	---
YNNUSGIPVFPVBX-NHCUHLMSSA-N	CLEMATINE	P08913	Alpha-2A adrenergic receptor	Known	7.0	---	---	---
MBNGWHIJMBWFHU-KQORAOOSSA-N	DIOSMETIN	P04798	Cytochrome P450 1A1	Known	7.0	---	---	---
MBNGWHIJMBWFHU-FIBGUPNXSA-N	DIOSMETIN	P04798	Cytochrome P450 1A1	Known	7.0	---	---	---
MBNGWHIJMBWFHU-UHFFFAOYSA-N	DIOSMETIN|5,7,3'-TRIHYDROXY-4'-METHOXYFLAVONE	P04798	Cytochrome P450 1A1	Known	7.0	---	---	---
SCZVLDHREVKTSH-UHFFFAOYSA-N	CHRYSOERIOL	P04798	Cytochrome P450 1A1	Known	7.0	---	---	---
IMEYGBIXGJLUIS-UHFFFAOYSA-N	CIRSILION|CIRSILIOL	P09917	Arachidonate 5-lipoxygenase	Known	7.0	---	---	---
LSHVYAFMTMFKBA-CTNGQTDRSA-N	CATECHIN-3-GALLATE	Q965D5	Enoyl-acyl-carrier protein reductase	Known	7.0	---	---	---
GMVPRGQOIOIIMI-OUKQBFOZSA-N	PROSTAGLANDIN-E-1	P43119	Prostacyclin receptor	Known	7.0	---	---	---
PGCKDCPTJAQQSQ-UHFFFAOYSA-N	ISOLICOFLAVONOL	P11511	Aromatase	Known	7.0	---	---	---
IVSZLXZYQVIEFR-UHFFFAOYSA-N	XYLENE|M-XYLENE	P22303	Acetylcholinesterase	Known	7.0	---	---	---
IWDCLRJOBJJRNH-UHFFFAOYSA-N	4-METHYLPHENOL|P-CRESOL|CRESOL	P22303	Acetylcholinesterase	Known	7.0	---	---	---
QHMBSVQNZZTUGM-ZENAZSQFSA-N	CANNABIDIOL|CANNIBIDIOL	O75762	Transient receptor potential cation channel subfamily A member 1	Known	7.0	---	---	---
QHMBSVQNZZTUGM-QNSVNVJESA-N	CANNABIDIOL|CANNIBIDIOL	O75762	Transient receptor potential cation channel subfamily A member 1	Known	7.0	---	---	---
QHMBSVQNZZTUGM-ROUUACIJSA-N	CANNABIDIOL	O75762	Transient receptor potential cation channel subfamily A member 1	Known	7.0	---	---	---
QHMBSVQNZZTUGM-ZWKOTPCHSA-N	CANNABIDIOL|CANNIBIDIOL	O75762	Transient receptor potential cation channel subfamily A member 1	Known	7.0	---	---	---
DZGWFCGJZKJUFP-UHFFFAOYSA-N	TYRAMINE	Q01959	Sodium-dependent dopamine transporter	Known	7.0	---	---	---
UDMBCSSLTHHNCD-KQYNXXCUSA-N	ADENYLIC-ACID	P12931	Proto-oncogene tyrosine-protein kinase Src	Known	7.0	---	---	---
QIGBRXMKCJKVMJ-UHFFFAOYSA-N	P-HYDROQUINONE|1,4-BENZENEDIOL|HYDROQUINONE	P00918	Carbonic anhydrase 2	Known	7.0	---	---	---
YNNUSGIPVFPVBX-NHCUHLMSSA-N	CLEMATINE	P11229	Muscarinic acetylcholine receptor M1	Known	6.9	---	---	---
APJYDQYYACXCRM-UHFFFAOYSA-N	TRYPTAMINE	P41595	5-hydroxytryptamine receptor 2B	Known	6.9	---	---	---
XEYBRNLFEZDVAW-RTYMFESYSA-N	PROSTAGLANDIN-E-2	P43088	Prostaglandin F2-alpha receptor	Known	6.9	---	---	---
LVVKXRQZSRUVPY-HNNXBMFYSA-N	(S)-COCLAURINE|COCLAURINE	P14416	D(2) dopamine receptor	Known	6.9	---	---	---
LVVKXRQZSRUVPY-OAHLLOKOSA-N	(+)-COCLAURINE|(R)-COCLAURINE	P14416	D(2) dopamine receptor	Known	6.9	---	---	---
VZTUIEROBZXUFA-MRXNPFEDSA-N	CANADINE	P14416	D(2) dopamine receptor	Known	6.9	---	---	---
VZTUIEROBZXUFA-INIZCTEOSA-N	CANADINE	P14416	D(2) dopamine receptor	Known	6.9	---	---	---
VZTUIEROBZXUFA-UHFFFAOYSA-N	CANADINE	P14416	D(2) dopamine receptor	Known	6.9	---	---	---
VMWNQDUVQKEIOC-CYBMUJFWSA-N	APOMORPHINE	P08913	Alpha-2A adrenergic receptor	Known	6.9	---	---	---
AUVVAXYIELKVAI-CKBKHPSWSA-N	EMETINE	P08913	Alpha-2A adrenergic receptor	Known	6.9	---	---	---
WHUUTDBJXJRKMK-UHFFFAOYSA-N	GLUTAMIC-ACID	Q13224	Glutamate receptor ionotropic, NMDA 2B	Known	6.9	---	---	---
KZNIFHPLKGYRTM-UHFFFAOYSA-N	APIGENIN	P05177	Cytochrome P450 1A2	Known	6.9	---	---	---
OIPILFWXSMYKGL-UHFFFAOYSA-N	CHOLINE	P43681	Neuronal acetylcholine receptor subunit alpha-4	Known	6.9	---	---	---
BTCSSZJGUNDROE-UHFFFAOYSA-N	4-AMINO-BUTYRIC-ACID|GAMMA-AMINOBUTYRIC-ACID	P18507	Gamma-aminobutyric acid receptor subunit gamma-2	Known	6.9	---	---	---
OVSQVDMCBVZWGM-CAWYGJOUSA-N	HYPERIN|QUERCETIN-3-O-GALACTOSIDE|HYPEROSIDE	P18825	Alpha-2C adrenergic receptor	Known	6.9	---	---	---
OVSQVDMCBVZWGM-DTGCRPNFSA-N	HYPERIN|QUERCETIN-3-O-GALACTOSIDE|HYPEROSIDE	P18825	Alpha-2C adrenergic receptor	Known	6.9	---	---	---
OVSQVDMCBVZWGM-ZVIPYZFUSA-N	QUERCETIN-3-O-GLUCOSIDE|ISOQUERCITRIN|TRIFOLIIN	P18825	Alpha-2C adrenergic receptor	Known	6.9	---	---	---
OVSQVDMCBVZWGM-WVTKYERHSA-N	HYPERIN|QUERCETIN-3-O-GALACTOSIDE|HYPEROSIDE	P18825	Alpha-2C adrenergic receptor	Known	6.9	---	---	---
OVSQVDMCBVZWGM-QSOFNFLRSA-N	QUERCETIN-3-O-GLUCOSIDE|TRIFOLIIN|HIRSUTRIN|ISOQUERCETIN|ISOQUERCITRIN|QUERCETOL-3-GLUCOSIDE|QUERCETIN-3-BETA-D-GLUCOSIDE|QUERCETIN-3-O-BETA-D-GLUCOSIDE|QUERCETIN-3-O-BETA-D-GLUCOPYRANOSIDE	P18825	Alpha-2C adrenergic receptor	Known	6.9	---	---	---
CDRPUGZCRXZLFL-OWOJBTEDSA-N	PICEATANNOL	O75116	Rho-associated protein kinase 2	Known	6.9	---	---	---
OCDGBSUVYYVKQZ-UHFFFAOYSA-N	GRAMINE|GRAMININE	P10635	Cytochrome P450 2D6	Known	6.8	---	---	---
ZTVIKZXZYLEVOL-UHFFFAOYSA-N	HOMATROPINE	P08172	Muscarinic acetylcholine receptor M2	Known	6.8	---	---	---
UQCNKQCJZOAFTQ-ISWURRPUSA-N	OXYMORPHINE	P41143	Delta-type opioid receptor	Known	6.8	---	---	---
VBGLYOIFKLUMQG-UHFFFAOYSA-N	CANNABINOL	P34972	Cannabinoid receptor 2	Known	6.8	---	---	---
MYKUKUCHPMASKF-VIFPVBQESA-N	NORNICOTINE	P02708	Acetylcholine receptor subunit alpha	Known	6.8	---	---	---
MYKUKUCHPMASKF-SECBINFHSA-N	NORNICOTINE|(+)-NORNICOTINE	P02708	Acetylcholine receptor subunit alpha	Known	6.8	---	---	---
XEYBRNLFEZDVAW-ARSRFYASSA-N	PROSTAGLANDIN-E-2	P43088	Prostaglandin F2-alpha receptor	Known	6.8	---	---	---
BQJCRHHNABKAKU-KBQPJGBKSA-N	MORPHINE	P41143	Delta-type opioid receptor	Known	6.8	---	---	---
IMEYGBIXGJLUIS-UHFFFAOYSA-N	CIRSILION|CIRSILIOL	P15121	Aldose reductase	Known	6.8	---	---	---
YXBUQQDFTYOHQI-UHFFFAOYSA-N	PSEUDOHYPERICIN	P35462	D(3) dopamine receptor	Known	6.8	---	---	---
VMWNQDUVQKEIOC-CYBMUJFWSA-N	APOMORPHINE	P28223	5-hydroxytryptamine receptor 2A	Known	6.8	---	---	---
SQFSKOYWJBQGKQ-UHFFFAOYSA-N	KAEMPFERIDE	P04798	Cytochrome P450 1A1	Known	6.8	---	---	---
WMBWREPUVVBILR-WIYYLYMNSA-N	EPI-GALLOCATECHIN-3-O-GALLATE|(-)-EPIGALLOCATECHIN-GALLATE|EPIGALLOCATECHIN-GALLATE|EPIGALLOCATECHIN-3-GALLATE|EPIGALLOCATECHOL-GALLATE|(-)-EPIGALLOCATECHIN-3-GALLATE|EPIGALLOCATECHIN-3-O-GALLATE|(-)-EPIGALLOCATECHIN-3-O-GALLATE|(-)-EPIGALLOCATECHOL-GALLATE	Q965D5	Enoyl-acyl-carrier protein reductase	Known	6.8	---	---	---
LSHVYAFMTMFKBA-UHFFFAOYSA-N	EPICATECHIN-GALLATE|(-)-EPICATECHIN-GALLATE	Q965D5	Enoyl-acyl-carrier protein reductase	Known	6.8	---	---	---
LSHVYAFMTMFKBA-FPOVZHCZSA-N	(-)-EPICATECHIN-GALLATE|(-)-EPICATECHIN-3-O-GALLATE|EPICATECHIN-3-O-GALLATE|EPICATECHIN-3-GALLATE|EPICATECHIN-GALLATE|(-)-EPICATECHIN-3-GALLATE	Q965D5	Enoyl-acyl-carrier protein reductase	Known	6.8	---	---	---
GMVPRGQOIOIIMI-DWKJAMRDSA-N	PROSTAGLANDIN-E-1	P43119	Prostacyclin receptor	Known	6.8	---	---	---
JKPISQIIWUONPB-UHFFFAOYSA-N	STEPHOLIDINE	P08908	5-hydroxytryptamine receptor 1A	Known	6.8	---	---	---
PVNIIMVLHYAWGP-UHFFFAOYSA-N	NIACIN|NICOTINIC-ACID	Q8TDS4	Hydroxycarboxylic acid receptor 2	Known	6.8	---	---	---
IYMHVUYNBVWXKH-ZITZVVOASA-N	PEDUNCULAGIN	P00734	Prothrombin	Known	6.8	---	---	---
IYMHVUYNBVWXKH-MMQHQYPESA-N	PEDUNCULAGIN	P00734	Prothrombin	Known	6.8	---	---	---
IYMHVUYNBVWXKH-UHFFFAOYSA-N	PEDUNCULAGIN	P00734	Prothrombin	Known	6.8	---	---	---
LSHVYAFMTMFKBA-TZIWHRDSSA-N	(-)-EPICATECHIN-GALLATE|(-)-EPICATECHOL-GALLATE|EPICATECHIN-3-O-GALLATE|EPICATECHIN-GALLATE|EPICATECHIN-3-GALLATE|(-)-EPICATECHIN-3-O-GALLATE|(-)-EPICATECHIN-3-GALLATE	P11413	Glucose-6-phosphate 1-dehydrogenase	Known	6.8	---	---	---
UQOFGTXDASPNLL-XHNCKOQMSA-N	MUSCARINE	P08172	Muscarinic acetylcholine receptor M2	Known	6.8	---	---	---
YXFVVABEGXRONW-UHFFFAOYSA-N	TOLUENE	P22303	Acetylcholinesterase	Known	6.8	---	---	---
QXACEHWTBCFNSA-SFQUDFHCSA-N	CANNABIGEROL	Q7Z2W7	Transient receptor potential cation channel subfamily M member 8	Known	6.8	---	---	---
REFJWTPEDVJJIY-UHFFFAOYSA-N	QUERCETIN|QUERCETOL	P21397	Amine oxidase [flavin-containing] A	Known	6.8	---	---	---
QZAYGJVTTNCVMB-UHFFFAOYSA-N	SEROTONIN|5-HYDROXYTRYPTAMINE	P31645	Sodium-dependent serotonin transporter	Known	6.8	---	---	---
QWCNQXNAFCBLLV-YWALDVPYSA-N	FALCARINDIOL	P21728	D(1A) dopamine receptor	Known	6.7	---	---	---
QWCNQXNAFCBLLV-KPJVXMDVSA-N	FALCARINDIOL	P21728	D(1A) dopamine receptor	Known	6.7	---	---	---
HCZKYJDFEPMADG-UHFFFAOYSA-N	NORDIHYDROGUAIARETIC-ACID	P09917	Arachidonate 5-lipoxygenase	Known	6.7	---	---	---
CAYMSCGTKZIVTN-TYILLQQXSA-N	ALPHA-CONIDENDRIN	P08684	Cytochrome P450 3A4	Known	6.7	---	---	---
QWCNQXNAFCBLLV-GXDHUFHOSA-N	FALCARINDIOL	P21728	D(1A) dopamine receptor	Known	6.7	---	---	---
HKOOXMFOFWEVGF-UHFFFAOYSA-N	PHENYLHYDRAZINE	P14902	Indoleamine 2,3-dioxygenase 1	Known	6.7	---	---	---
CAYMSCGTKZIVTN-PJIJBLCYSA-N	ALPHA-CONIDENDRIN	P08684	Cytochrome P450 3A4	Known	6.7	---	---	---
QWCNQXNAFCBLLV-RCQSYPNMSA-N	FALCARINDIOL	P21728	D(1A) dopamine receptor	Known	6.7	---	---	---
VOXZDWNPVJITMN-SFFUCWETSA-N	ESTRADIOL	Q92731	Estrogen receptor beta	Known	6.7	---	---	---
UQCNKQCJZOAFTQ-ISWURRPUSA-N	OXYMORPHINE	P41145	Kappa-type opioid receptor	Known	6.7	---	---	---
VMWNQDUVQKEIOC-CYBMUJFWSA-N	APOMORPHINE	P21728	D(1A) dopamine receptor	Known	6.7	---	---	---
KNWVMRVOBAFFMH-OAHLLOKOSA-N	(-)-SCOULERINE	P14416	D(2) dopamine receptor	Known	6.7	---	---	---
KNWVMRVOBAFFMH-HNNXBMFYSA-N	SCOULERINE|(-)-SCOULERINE	P14416	D(2) dopamine receptor	Known	6.7	---	---	---
OIRDTQYFTABQOQ-KQYNXXCUSA-N	ADENOSINE	P29275	Adenosine receptor A2b	Known	6.7	---	---	---
OIRDTQYFTABQOQ-SXVXDFOESA-N	ADENOSINE	P29275	Adenosine receptor A2b	Known	6.7	---	---	---
KNWVMRVOBAFFMH-UHFFFAOYSA-N	(-)-SCOULERINE	P14416	D(2) dopamine receptor	Known	6.7	---	---	---
QZAYGJVTTNCVMB-UHFFFAOYSA-N	SEROTONIN|5-HYDROXYTRYPTAMINE	P28223	5-hydroxytryptamine receptor 2A	Known	6.7	---	---	---
YNNUSGIPVFPVBX-NHCUHLMSSA-N	CLEMATINE	P18089	Alpha-2B adrenergic receptor	Known	6.7	---	---	---
LSHVYAFMTMFKBA-TZIWHRDSSA-N	(-)-EPICATECHIN-GALLATE|(-)-EPICATECHOL-GALLATE|EPICATECHIN-3-O-GALLATE|EPICATECHIN-GALLATE|EPICATECHIN-3-GALLATE|(-)-EPICATECHIN-3-O-GALLATE|(-)-EPICATECHIN-3-GALLATE	Q965D5	Enoyl-acyl-carrier protein reductase	Known	6.7	---	---	---
OINNEUNVOZHBOX-QIRCYJPOSA-N	GERANYLGERANYL-DIPHOSPHATE	P49354	Protein farnesyltransferase/geranylgeranyltransferase type-1 subunit alpha	Known	6.7	---	---	---
QZAYGJVTTNCVMB-UHFFFAOYSA-N	SEROTONIN|5-HYDROXYTRYPTAMINE	P47898	5-hydroxytryptamine receptor 5A	Known	6.7	---	---	---
VYAKIUWQLHRZGK-UHFFFAOYSA-N	6-HYDROXY-LUTEOLIN	P15121	Aldose reductase	Known	6.7	---	---	---
AUVVAXYIELKVAI-CKBKHPSWSA-N	EMETINE	P18825	Alpha-2C adrenergic receptor	Known	6.7	---	---	---
WHUUTDBJXJRKMK-VKHMYHEASA-N	GLUTAMIC-ACID|L-GLUTAMIC-ACID	Q13224	Glutamate receptor ionotropic, NMDA 2B	Known	6.7	---	---	---
WHUUTDBJXJRKMK-UHFFFAOYSA-N	GLUTAMIC-ACID	Q12879	Glutamate receptor ionotropic, NMDA 2A	Known	6.7	---	---	---
KMOUJOKENFFTPU-QNDFHXLGSA-N	APIGENIN-7-GLUCOSIDE|APIGENIN-7-O-BETA-D-GLUCOSIDE|APIGENIN-7-O-GLUCOSIDE|COSMOSIIN|APIGETRIN	P01375	Tumor necrosis factor	Known	6.7	---	---	---
KMOUJOKENFFTPU-NFRVFMFJSA-N	APIGENIN-7-O-GLUCOSIDE	P01375	Tumor necrosis factor	Known	6.7	---	---	---
KMOUJOKENFFTPU-UHFFFAOYSA-N	APIGENIN-7-O-BETA-D-GLUCOSIDE|APIGENIN-7-GLUCOSIDE|APIGENIN-7-O-GLUCOSIDE|APIGETRIN|COSMOSSIIN|COSMOSIIN	P01375	Tumor necrosis factor	Known	6.7	---	---	---
KMOUJOKENFFTPU-OBJCFNGXSA-N	COSMOSSIIN|COSMOSIIN	P01375	Tumor necrosis factor	Known	6.7	---	---	---
KLAOKWJLUQKWIF-UHFFFAOYSA-N	EUPATORIN	P04798	Cytochrome P450 1A1	Known	6.7	---	---	---
MUMGGOZAMZWBJJ-KZYORJDKSA-N	EPITESTOSTERONE	P08185	Corticosteroid-binding globulin	Known	6.7	---	---	---
MUMGGOZAMZWBJJ-DYKIIFRCSA-N	TESTOSTERONE	P08185	Corticosteroid-binding globulin	Known	6.7	---	---	---
LSHVYAFMTMFKBA-FPOVZHCZSA-N	(-)-EPICATECHIN-GALLATE|(-)-EPICATECHIN-3-O-GALLATE|EPICATECHIN-3-O-GALLATE|EPICATECHIN-3-GALLATE|EPICATECHIN-GALLATE|(-)-EPICATECHIN-3-GALLATE	P11413	Glucose-6-phosphate 1-dehydrogenase	Known	6.7	---	---	---
LSHVYAFMTMFKBA-UHFFFAOYSA-N	EPICATECHIN-GALLATE|(-)-EPICATECHIN-GALLATE	P11413	Glucose-6-phosphate 1-dehydrogenase	Known	6.7	---	---	---
CTQNGGLPUBDAKN-UHFFFAOYSA-N	XYLENE	P22303	Acetylcholinesterase	Known	6.7	---	---	---
AFSDNFLWKVMVRB-UHFFFAOYSA-N	ELLAGIC-ACID	P15121	Aldose reductase	Known	6.7	---	---	---
JKPISQIIWUONPB-HNNXBMFYSA-N	STEPHOLIDINE	P41595	5-hydroxytryptamine receptor 2B	Known	6.7	---	---	---
JKPISQIIWUONPB-UHFFFAOYSA-N	STEPHOLIDINE	P41595	5-hydroxytryptamine receptor 2B	Known	6.7	---	---	---
DHMQDGOQFOQNFH-UHFFFAOYSA-N	GLYCINE|GLYCOCOLL	Q12879	Glutamate receptor ionotropic, NMDA 2A	Known	6.7	---	---	---
DHMQDGOQFOQNFH-UHFFFAOYSA-N	GLYCINE|GLYCOCOLL	Q13224	Glutamate receptor ionotropic, NMDA 2B	Known	6.7	---	---	---
JKPISQIIWUONPB-UHFFFAOYSA-N	STEPHOLIDINE	P18825	Alpha-2C adrenergic receptor	Known	6.7	---	---	---
JKPISQIIWUONPB-HNNXBMFYSA-N	STEPHOLIDINE	P18825	Alpha-2C adrenergic receptor	Known	6.7	---	---	---
GHKISGDRQRSCII-UHFFFAOYSA-N	CHELIDONINE	P10635	Cytochrome P450 2D6	Known	6.7	---	---	---
GHKISGDRQRSCII-NIKGAXFTSA-N	CHELIDONINE	P10635	Cytochrome P450 2D6	Known	6.7	---	---	---
GHKISGDRQRSCII-ZOCIIQOWSA-N	(+)-CHELIDONINE|CHELIDONINE	P10635	Cytochrome P450 2D6	Known	6.7	---	---	---
MPDGHEJMBKOTSU-PMTKVOBESA-N	BETA-GLYCYRRHETINIC-ACID	P24723	Protein kinase C eta type	Known	6.6	---	---	---
MPDGHEJMBKOTSU-UHFFFAOYSA-N	URALENIC-ACID	P24723	Protein kinase C eta type	Known	6.6	---	---	---
MPDGHEJMBKOTSU-WFJWTYAKSA-N	URALENIC-ACID	P24723	Protein kinase C eta type	Known	6.6	---	---	---
MPDGHEJMBKOTSU-JNYFVOPZSA-N	18-ALPHA-GLYCYRRHETINIC-ACID	P24723	Protein kinase C eta type	Known	6.6	---	---	---
MPDGHEJMBKOTSU-HDCNTZMNSA-N	18-BETA-GLYCYRRHETINIC-ACID	P24723	Protein kinase C eta type	Known	6.6	---	---	---
MPDGHEJMBKOTSU-YKLVYJNSSA-N	GLYCYRRHETINIC-ACID|URALENIC-ACID	P24723	Protein kinase C eta type	Known	6.6	---	---	---
AEQDJSLRWYMAQI-KRWDZBQOSA-N	TETRAHYDROPALMATINE	P21728	D(1A) dopamine receptor	Known	6.6	---	---	---
VZCCETWTMQHEPK-QNEBEIHSSA-N	GAMOLENIC-ACID|GAMMA-LINOLENIC-ACID|CIS-GAMMA-LINOLENIC-ACID	Q07869	Peroxisome proliferator-activated receptor alpha	Known	6.6	---	---	---
VZCCETWTMQHEPK-YHTMAJSVSA-N	GAMMA-LINOLENIC-ACID	Q07869	Peroxisome proliferator-activated receptor alpha	Known	6.6	---	---	---
LVVKXRQZSRUVPY-OAHLLOKOSA-N	(+)-COCLAURINE|(R)-COCLAURINE	P21728	D(1A) dopamine receptor	Known	6.6	---	---	---
LVVKXRQZSRUVPY-HNNXBMFYSA-N	(S)-COCLAURINE|COCLAURINE	P21728	D(1A) dopamine receptor	Known	6.6	---	---	---
ANJTVLIZGCUXLD-RKDXNWHRSA-N	CYTISINE	P02708	Acetylcholine receptor subunit alpha	Known	6.6	---	---	---
WHUUTDBJXJRKMK-UHFFFAOYSA-N	GLUTAMIC-ACID	Q05586	Glutamate receptor ionotropic, NMDA 1	Known	6.6	---	---	---
OXGUCUVFOIWWQJ-HQBVPOQASA-N	QUERCETRIN|QUERCETIN-3-RHAMNOSIDE|QUERCETIN-3-O-RHAMNOSIDE|QUERCITRIN	P15121	Aldose reductase	Known	6.6	---	---	---
IYRMWMYZSQPJKC-UHFFFAOYSA-N	KAEMPFEROL|TRIFOLITIN	P05177	Cytochrome P450 1A2	Known	6.6	---	---	---
LSHVYAFMTMFKBA-CTNGQTDRSA-N	CATECHIN-3-GALLATE	P11413	Glucose-6-phosphate 1-dehydrogenase	Known	6.6	---	---	---
YMGOOHXUOWZQOE-UHFFFAOYSA-N	TAIWANIN-C	P09917	Arachidonate 5-lipoxygenase	Known	6.6	---	---	---
WMBWREPUVVBILR-GHTZIAJQSA-N	GALLOCATECHIN-3-O-GALLATE	P11413	Glucose-6-phosphate 1-dehydrogenase	Known	6.6	---	---	---
WMBWREPUVVBILR-NQIIRXRSSA-N	GALLOCATECHIN-GALLATE|(-)-GALLOCATECHIN-GALLATE|GALLOCATECHOL	P11413	Glucose-6-phosphate 1-dehydrogenase	Known	6.6	---	---	---
WMBWREPUVVBILR-WIYYLYMNSA-N	EPI-GALLOCATECHIN-3-O-GALLATE|(-)-EPIGALLOCATECHIN-GALLATE|EPIGALLOCATECHIN-GALLATE|EPIGALLOCATECHIN-3-GALLATE|EPIGALLOCATECHOL-GALLATE|(-)-EPIGALLOCATECHIN-3-GALLATE|EPIGALLOCATECHIN-3-O-GALLATE|(-)-EPIGALLOCATECHIN-3-O-GALLATE|(-)-EPIGALLOCATECHOL-GALLATE	P11413	Glucose-6-phosphate 1-dehydrogenase	Known	6.6	---	---	---
KRZBCHWVBQOTNZ-PSEXTPKNSA-N	3,5-DICAFFEOYLQUINIC-ACID	P15121	Aldose reductase	Known	6.6	---	---	---
KRZBCHWVBQOTNZ-RDJMKVHDSA-N	3,5-DI-O-CAFFEOYLQUINIC-ACID	P15121	Aldose reductase	Known	6.6	---	---	---
AFSDNFLWKVMVRB-UHFFFAOYSA-N	ELLAGIC-ACID	P08069	Insulin-like growth factor 1 receptor	Known	6.6	---	---	---
AKNNEGZIBPJZJG-MSOLQXFVSA-N	(-)-ALPHA-NARCOTINE|NARCOTINE|NOSCAPINE	P33261	Cytochrome P450 2C19	Known	6.6	---	---	---
DHMQDGOQFOQNFH-UHFFFAOYSA-N	GLYCINE|GLYCOCOLL	Q05586	Glutamate receptor ionotropic, NMDA 1	Known	6.6	---	---	---
MTCFGRXMJLQNBG-UWTATZPHSA-N	SERINE	Q13224	Glutamate receptor ionotropic, NMDA 2B	Known	6.6	---	---	---
MTCFGRXMJLQNBG-UHFFFAOYSA-N	SERINE	Q12879	Glutamate receptor ionotropic, NMDA 2A	Known	6.6	---	---	---
MTCFGRXMJLQNBG-UWTATZPHSA-N	SERINE	Q12879	Glutamate receptor ionotropic, NMDA 2A	Known	6.6	---	---	---
MTCFGRXMJLQNBG-UHFFFAOYSA-N	SERINE	Q13224	Glutamate receptor ionotropic, NMDA 2B	Known	6.6	---	---	---
MTCFGRXMJLQNBG-REOHCLBHSA-N	SERINE	Q12879	Glutamate receptor ionotropic, NMDA 2A	Known	6.6	---	---	---
MTCFGRXMJLQNBG-REOHCLBHSA-N	SERINE	Q13224	Glutamate receptor ionotropic, NMDA 2B	Known	6.6	---	---	---
LUKBXSAWLPMMSZ-UPHRSURJSA-N	RESVERATROL|CIS-RESVERATROL	P42336	Phosphatidylinositol 4,5-bisphosphate 3-kinase catalytic subunit alpha isoform	Known	6.6	---	---	---
CDRPUGZCRXZLFL-OWOJBTEDSA-N	PICEATANNOL	P27448	MAP/microtubule affinity-regulating kinase 3	Known	6.6	---	---	---
LUKBXSAWLPMMSZ-OWOJBTEDSA-N	TRANS-RESVERATROL|RESVERATROL	P42336	Phosphatidylinositol 4,5-bisphosphate 3-kinase catalytic subunit alpha isoform	Known	6.6	---	---	---
AFSDNFLWKVMVRB-UHFFFAOYSA-N	ELLAGIC-ACID	Q4U2R8	Solute carrier family 22 member 6	Known	6.6	---	---	---
RXPRRQLKFXBCSJ-HLAWJBBLSA-N	VINCADINE|(-)-16-EPIVINCAMINE|VINCAMENINE|EPIVINCAMINE|VINCAMINE	P10635	Cytochrome P450 2D6	Known	6.6	---	---	---
RXPRRQLKFXBCSJ-UHFFFAOYSA-N	VINCAMENINE|EPIVINCAMINE|ISOVINCAMINE|14-EPIVINCAMINE|VINCAMINE|VINCADINE	P10635	Cytochrome P450 2D6	Known	6.6	---	---	---
YNNUSGIPVFPVBX-NHCUHLMSSA-N	CLEMATINE	P28222	5-hydroxytryptamine receptor 1B	Known	6.5	---	---	---
NPOAOTPXWNWTSH-UHFFFAOYSA-N	DICROTALIC-ACID|BETA-HYDROXY-BETA-METHYL-GLUTARIC-ACID	P04035	3-hydroxy-3-methylglutaryl-coenzyme A reductase	Known	6.5	---	---	---
TZBJGXHYKVUXJN-UHFFFAOYSA-N	1,3,7-TRIHYDROXYXANTHONE|GENISTEIN	Q06278	Aldehyde oxidase	Known	6.5	---	---	---
APJYDQYYACXCRM-UHFFFAOYSA-N	TRYPTAMINE	P50406	5-hydroxytryptamine receptor 6	Known	6.5	---	---	---
LZJRNLRASBVRRX-UHFFFAOYSA-N	BOLDINE	P35368	Alpha-1B adrenergic receptor	Known	6.5	---	---	---
VBGLYOIFKLUMQG-UHFFFAOYSA-N	CANNABINOL	P21554	Cannabinoid receptor 1	Known	6.5	---	---	---
LZJRNLRASBVRRX-ZDUSSCGKSA-N	(+)-BOLDINE|BOLDINE|BOLDIN	P35368	Alpha-1B adrenergic receptor	Known	6.5	---	---	---
LZJRNLRASBVRRX-UHFFFAOYSA-N	BOLDINE	P21728	D(1A) dopamine receptor	Known	6.5	---	---	---
LZJRNLRASBVRRX-ZDUSSCGKSA-N	(+)-BOLDINE|BOLDINE|BOLDIN	P21728	D(1A) dopamine receptor	Known	6.5	---	---	---
FEFAIBOZOKSLJR-UHFFFAOYSA-N	MILTIRONE|MILTIORONE	P18507	Gamma-aminobutyric acid receptor subunit gamma-2	Known	6.5	---	---	---
SNICXCGAKADSCV-JTQLQIEISA-N	NICOTINE	P02708	Acetylcholine receptor subunit alpha	Known	6.5	---	---	---
FEFAIBOZOKSLJR-UHFFFAOYSA-N	MILTIRONE|MILTIORONE	P14867	Gamma-aminobutyric acid receptor subunit alpha-1	Known	6.5	---	---	---
JCTYWRARKVGOBK-UHFFFAOYSA-N	APOREINE|ROEMERINE	P21728	D(1A) dopamine receptor	Known	6.5	---	---	---
JCTYWRARKVGOBK-CQSZACIVSA-N	APOREINE|ROEMERINE	P21728	D(1A) dopamine receptor	Known	6.5	---	---	---
JCTYWRARKVGOBK-AWEZNQCLSA-N	APOREINE|ROEMERINE	P21728	D(1A) dopamine receptor	Known	6.5	---	---	---
BYWLLSQTJBXAPV-UHFFFAOYSA-N	CHRYSOSPLENOL-D	P15121	Aldose reductase	Known	6.5	---	---	---
WMBWREPUVVBILR-GHTZIAJQSA-N	GALLOCATECHIN-3-O-GALLATE	Q965D5	Enoyl-acyl-carrier protein reductase	Known	6.5	---	---	---
VOXZDWNPVJITMN-ZBRFXRBCSA-N	17-BETA-ESTRADIOL|ESTRADIOL	P10275	Androgen receptor	Known	6.5	---	---	---
AEMFNILZOJDQLW-QAGGRKNESA-N	ANDROSTENEDIONE	P11511	Aromatase	Known	6.5	---	---	---
QWUHUBDKQQPMQG-UHFFFAOYSA-N	6-HYDROXYLUTEOLIN-6-METHYL-ETHER	P15121	Aldose reductase	Known	6.5	---	---	---
DXDRHHKMWQZJHT-FPYGCLRLSA-N	ISOLIQUIRITIGENIN|2',4',4'-TRIHYDROXYCHALCONE	P15121	Aldose reductase	Known	6.5	---	---	---
ZKLXUUYLEHCAMF-UUWFMWQGSA-N	ORIPAVINE	P35372	Mu-type opioid receptor	Known	6.5	---	---	---
OIPILFWXSMYKGL-UHFFFAOYSA-N	CHOLINE	P08172	Muscarinic acetylcholine receptor M2	Known	6.5	---	---	---
XQYZDYMELSJDRZ-UHFFFAOYSA-N	PAPAVERINE|PAPAVARINE	Q14432	cGMP-inhibited 3',5'-cyclic phosphodiesterase A	Known	6.5	---	---	---
KRVXMNNRSSQZJP-PHFHYRSDSA-N	ANDROSTEROL	Q14994	Nuclear receptor subfamily 1 group I member 3	Known	6.5	---	---	---
PZZRDJXEMZMZFD-ZMQFRBSTSA-N	QUERCETIN-3-O-BETA-D-XYLOPYRANOSIDE	P15121	Aldose reductase	Known	6.5	---	---	---
PZZRDJXEMZMZFD-ODPGBAFUSA-N	REYNOUTRIN	P15121	Aldose reductase	Known	6.5	---	---	---
PZZRDJXEMZMZFD-DUYPVGENSA-N	QUERCETIN-3-O-XYLOSIDE	P15121	Aldose reductase	Known	6.5	---	---	---
PZZRDJXEMZMZFD-SQIUQIIDSA-N	GUAIJAVERIN	P15121	Aldose reductase	Known	6.5	---	---	---
PZZRDJXEMZMZFD-RLDUMJPOSA-N	GUAIJAVERIN	P15121	Aldose reductase	Known	6.5	---	---	---
PZZRDJXEMZMZFD-IEGSVRCHSA-N	QUERCETIN-3-ARABINOSIDE|GUAIJAVERIN	P15121	Aldose reductase	Known	6.5	---	---	---
CHBITXAMNKHJCR-JNUHSSLSSA-N	CASUARIIN	P00734	Prothrombin	Known	6.5	---	---	---
AFSDNFLWKVMVRB-UHFFFAOYSA-N	ELLAGIC-ACID	P12931	Proto-oncogene tyrosine-protein kinase Src	Known	6.5	---	---	---
QZAYGJVTTNCVMB-UHFFFAOYSA-N	SEROTONIN|5-HYDROXYTRYPTAMINE	P46098	5-hydroxytryptamine receptor 3A	Known	6.5	---	---	---
VHBFFQKBGNRLFZ-UHFFFAOYSA-N	2-PHENYLCHROMONE	P11511	Aromatase	Known	6.5	---	---	---
VGEREEWJJVICBM-UHFFFAOYSA-N	PHLORETIN	P03372	Estrogen receptor	Known	6.5	---	---	---
IKGXIBQEEMLURG-FNKLJWKFSA-N	RUTIN	P18825	Alpha-2C adrenergic receptor	Known	6.5	---	---	---
IKGXIBQEEMLURG-UHFFFAOYSA-N	RUTOSIDE|QUERCETIN-3-RHAMNOGLUCOSIDE|VIOLAQUERCITRIN	P18825	Alpha-2C adrenergic receptor	Known	6.5	---	---	---
IKGXIBQEEMLURG-FNKLJWKFSA-N	RUTIN	P08913	Alpha-2A adrenergic receptor	Known	6.5	---	---	---
VMWNQDUVQKEIOC-CYBMUJFWSA-N	APOMORPHINE	P41145	Kappa-type opioid receptor	Known	6.5	---	---	---
IKGXIBQEEMLURG-UHFFFAOYSA-N	RUTOSIDE|QUERCETIN-3-RHAMNOGLUCOSIDE|VIOLAQUERCITRIN	P08913	Alpha-2A adrenergic receptor	Known	6.5	---	---	---
YNNUSGIPVFPVBX-NHCUHLMSSA-N	CLEMATINE	Q12809	Potassium voltage-gated channel subfamily H member 2	Known	6.5	---	---	---
REFJWTPEDVJJIY-UHFFFAOYSA-N	QUERCETIN|QUERCETOL	P08069	Insulin-like growth factor 1 receptor	Known	6.5	---	---	---
VMWNQDUVQKEIOC-CYBMUJFWSA-N	APOMORPHINE	P41143	Delta-type opioid receptor	Known	6.5	---	---	---
REFJWTPEDVJJIY-UHFFFAOYSA-N	QUERCETIN|QUERCETOL	P35968	Vascular endothelial growth factor receptor 2	Known	6.5	---	---	---
LUKBXSAWLPMMSZ-UPHRSURJSA-N	RESVERATROL|CIS-RESVERATROL	P05177	Cytochrome P450 1A2	Known	6.5	---	---	---
MTCFGRXMJLQNBG-REOHCLBHSA-N	SERINE	Q05586	Glutamate receptor ionotropic, NMDA 1	Known	6.5	---	---	---
MTCFGRXMJLQNBG-UWTATZPHSA-N	SERINE	Q05586	Glutamate receptor ionotropic, NMDA 1	Known	6.5	---	---	---
MTCFGRXMJLQNBG-UHFFFAOYSA-N	SERINE	Q05586	Glutamate receptor ionotropic, NMDA 1	Known	6.5	---	---	---
CDRPUGZCRXZLFL-OWOJBTEDSA-N	PICEATANNOL	P48729	Casein kinase I isoform alpha	Known	6.5	---	---	---
AFSDNFLWKVMVRB-UHFFFAOYSA-N	ELLAGIC-ACID	P06213	Insulin receptor	Known	6.5	---	---	---
AUVVAXYIELKVAI-CKBKHPSWSA-N	EMETINE	P08684	Cytochrome P450 3A4	Known	6.5	---	---	---
PUAQLLVFLMYYJJ-UHFFFAOYSA-N	CHATININE	Q01959	Sodium-dependent dopamine transporter	Known	6.4	---	---	---
PUAQLLVFLMYYJJ-ZETCQYMHSA-N	CHATININE	Q01959	Sodium-dependent dopamine transporter	Known	6.4	---	---	---
AZQWKYJCGOJGHM-UHFFFAOYSA-N	1,4-BENZOQUINONE|QUINONE	O75762	Transient receptor potential cation channel subfamily A member 1	Known	6.4	---	---	---
RWXIFXNRCLMQCD-ZOCDRWSISA-N	GINSENOSIDE-RG-3	Q12809	Potassium voltage-gated channel subfamily H member 2	Known	6.4	---	---	---
RWXIFXNRCLMQCD-SYRJRVSLSA-N	GINSENOSIDE-RG-3	Q12809	Potassium voltage-gated channel subfamily H member 2	Known	6.4	---	---	---
RWXIFXNRCLMQCD-JBVRGBGGSA-N	GINSENOSIDE-RG3	Q12809	Potassium voltage-gated channel subfamily H member 2	Known	6.4	---	---	---
NISPVUDLMHQFRQ-MKIKIEMVSA-N	CUCURBITACIN-I	P08684	Cytochrome P450 3A4	Known	6.4	---	---	---
SONNWYBIRXJNDC-VIFPVBQESA-N	SYNEPHRINE|SYNEPHERINE	P18825	Alpha-2C adrenergic receptor	Known	6.4	---	---	---
XYYVYLMBEZUESM-CMKMFDCUSA-N	CODEINONE|(-)-CODEINONE	P35372	Mu-type opioid receptor	Known	6.4	---	---	---
XQJMXPAEFMWDOZ-PBWFPOADSA-N	TROPACOCAINE	P46098	5-hydroxytryptamine receptor 3A	Known	6.4	---	---	---
XQJMXPAEFMWDOZ-UHFFFAOYSA-N	TROPACOCAINE	P46098	5-hydroxytryptamine receptor 3A	Known	6.4	---	---	---
QHMBSVQNZZTUGM-ROUUACIJSA-N	CANNABIDIOL	P34972	Cannabinoid receptor 2	Known	6.4	---	---	---
QHMBSVQNZZTUGM-QNSVNVJESA-N	CANNABIDIOL|CANNIBIDIOL	P34972	Cannabinoid receptor 2	Known	6.4	---	---	---
QHMBSVQNZZTUGM-ZENAZSQFSA-N	CANNABIDIOL|CANNIBIDIOL	P34972	Cannabinoid receptor 2	Known	6.4	---	---	---
RJKFOVLPORLFTN-LEKSSAKUSA-N	PROGESTERONE	P04150	Glucocorticoid receptor	Known	6.4	---	---	---
RJKFOVLPORLFTN-STHVQZNPSA-N	PROGESTERONE	P04150	Glucocorticoid receptor	Known	6.4	---	---	---
SONNWYBIRXJNDC-VIFPVBQESA-N	SYNEPHRINE|SYNEPHERINE	P18089	Alpha-2B adrenergic receptor	Known	6.4	---	---	---
SONNWYBIRXJNDC-VIFPVBQESA-N	SYNEPHRINE|SYNEPHERINE	P08913	Alpha-2A adrenergic receptor	Known	6.4	---	---	---
LNQVTSROQXJCDD-KQYNXXCUSA-N	ADENYLIC-ACID	P30542	Adenosine receptor A1	Known	6.4	---	---	---
WUADCCWRTIWANL-UHFFFAOYSA-N	PRATENSOL|METHYLGENISTEIN|BIOCHANIN-A	P27338	Amine oxidase [flavin-containing] B	Known	6.4	---	---	---
VYFYYTLLBUKUHU-UHFFFAOYSA-N	DOPAMINE	P21918	D(1B) dopamine receptor	Known	6.4	---	---	---
VYFYYTLLBUKUHU-UHFFFAOYSA-N	DOPAMINE	P14416	D(2) dopamine receptor	Known	6.4	---	---	---
YNNUSGIPVFPVBX-NHCUHLMSSA-N	CLEMATINE	P31645	Sodium-dependent serotonin transporter	Known	6.4	---	---	---
XHEFDIBZLJXQHF-UHFFFAOYSA-N	FISETIN	P49840	Glycogen synthase kinase-3 alpha	Known	6.4	---	---	---
XHEFDIBZLJXQHF-UHFFFAOYSA-N	FISETIN	P49841	Glycogen synthase kinase-3 beta	Known	6.4	---	---	---
IKMDFBPHZNJCSN-UHFFFAOYSA-N	MYRICETIN	Q965D5	Enoyl-acyl-carrier protein reductase	Known	6.4	---	---	---
YNNUSGIPVFPVBX-NHCUHLMSSA-N	CLEMATINE	P25021	Histamine H2 receptor	Known	6.4	---	---	---
KZNIFHPLKGYRTM-UHFFFAOYSA-N	APIGENIN	P04798	Cytochrome P450 1A1	Known	6.4	---	---	---
IKMDFBPHZNJCSN-UHFFFAOYSA-N	MYRICETIN	P04798	Cytochrome P450 1A1	Known	6.4	---	---	---
REFJWTPEDVJJIY-UHFFFAOYSA-N	QUERCETIN|QUERCETOL	P18054	Arachidonate 12-lipoxygenase, 12S-type	Known	6.4	---	---	---
WUADCCWRTIWANL-UHFFFAOYSA-N	PRATENSOL|METHYLGENISTEIN|BIOCHANIN-A	P21397	Amine oxidase [flavin-containing] A	Known	6.4	---	---	---
URLKBWYHVLBVBO-UHFFFAOYSA-N	XYLENE|P-XYLENE	P22303	Acetylcholinesterase	Known	6.4	---	---	---
RZXMPPFPUUCRFN-UHFFFAOYSA-N	TOLUIDINE	P22303	Acetylcholinesterase	Known	6.4	---	---	---
YBHILYKTIRIUTE-UHFFFAOYSA-N	BERBERINE	P18089	Alpha-2B adrenergic receptor	Known	6.4	---	---	---
WHUUTDBJXJRKMK-GSVOUGTGSA-N	GLUTAMIC-ACID	P42261	Glutamate receptor 1	Known	6.4	---	---	---
CGKWSLSAYABZTL-GOSISDBHSA-N	LICOFLAVANONE	P11511	Aromatase	Known	6.4	---	---	---
BXNJHAXVSOCGBA-UHFFFAOYSA-N	HARMINE	P05177	Cytochrome P450 1A2	Known	6.4	---	---	---
CDRPUGZCRXZLFL-OWOJBTEDSA-N	PICEATANNOL	P07949	Proto-oncogene tyrosine-protein kinase receptor Ret	Known	6.4	---	---	---
DOBMPNYZJYQDGZ-UHFFFAOYSA-N	DICUMAROL	P11712	Cytochrome P450 2C9	Known	6.4	---	---	---
IKMDFBPHZNJCSN-UHFFFAOYSA-N	MYRICETIN	P11388	DNA topoisomerase 2-alpha	Known	6.4	---	---	---
PFTAWBLQPZVEMU-UKRRQHHQSA-N	EPICATECHIN|(-)-EPICATECHOL|CATECHIN|EPICATECHOL|(-)-EPICATECHIN	P05186	Alkaline phosphatase, tissue-nonspecific isozyme	Known	6.4	---	---	---
UBAXRAHSPKWNCX-UHFFFAOYSA-N	DIALLYL-TRISULFIDE	O75762	Transient receptor potential cation channel subfamily A member 1	Known	6.3	---	---	---
IBRKLUSXDYATLG-LURJTMIESA-N	(-)-SALSOLINOL	P35462	D(3) dopamine receptor	Known	6.3	---	---	---
KNWVMRVOBAFFMH-OAHLLOKOSA-N	(-)-SCOULERINE	P21728	D(1A) dopamine receptor	Known	6.3	---	---	---
OIRDTQYFTABQOQ-KQYNXXCUSA-N	ADENOSINE	P0DMS8	Adenosine receptor A3	Known	6.3	---	---	---
LZJRNLRASBVRRX-UHFFFAOYSA-N	BOLDINE	P14416	D(2) dopamine receptor	Known	6.3	---	---	---
LZJRNLRASBVRRX-ZDUSSCGKSA-N	(+)-BOLDINE|BOLDINE|BOLDIN	P14416	D(2) dopamine receptor	Known	6.3	---	---	---
WMBWREPUVVBILR-NQIIRXRSSA-N	GALLOCATECHIN-GALLATE|(-)-GALLOCATECHIN-GALLATE|GALLOCATECHOL	Q965D5	Enoyl-acyl-carrier protein reductase	Known	6.3	---	---	---
VYFYYTLLBUKUHU-UHFFFAOYSA-N	DOPAMINE	P21728	D(1A) dopamine receptor	Known	6.3	---	---	---
FXNFHKRTJBSTCS-UHFFFAOYSA-N	BAICALEIN	P05177	Cytochrome P450 1A2	Known	6.3	---	---	---
UDMBCSSLTHHNCD-KQYNXXCUSA-N	ADENYLIC-ACID	P30542	Adenosine receptor A1	Known	6.3	---	---	---
SAMBWAJRKKEEOR-UHFFFAOYSA-N	XANTHOMICROL	P15121	Aldose reductase	Known	6.3	---	---	---
AYMYWHCQALZEGT-ORCRQEGFSA-N	BUTEIN	P15121	Aldose reductase	Known	6.3	---	---	---
WHUUTDBJXJRKMK-VKHMYHEASA-N	GLUTAMIC-ACID|L-GLUTAMIC-ACID	Q12879	Glutamate receptor ionotropic, NMDA 2A	Known	6.3	---	---	---
OXGUCUVFOIWWQJ-UHFFFAOYSA-N	QUERCETRIN|QUERCETIN-3-O-L-RHAMNOSIDE|QUERCETIN-3-RHAMNOSIDE|QUERCETIN-3-O-RHAMNOSIDE	P15121	Aldose reductase	Known	6.3	---	---	---
OXGUCUVFOIWWQJ-KNPIPFGMSA-N	QUERCETRIN|QUERCETIN-3-O-RHAMNOSIDE|QUERCITRIN	P15121	Aldose reductase	Known	6.3	---	---	---
OXGUCUVFOIWWQJ-XIMSSLRFSA-N	QUERCETRIN|QUERCETIN-3-RHAMNOSIDE|QUERCETIN-3-O-RHAMNOSIDE|QUERCITRIN	P15121	Aldose reductase	Known	6.3	---	---	---
OXGUCUVFOIWWQJ-LDWSSRBJSA-N	QUERCETIN-3-O-L-RHAMNOSIDE	P15121	Aldose reductase	Known	6.3	---	---	---
YBHILYKTIRIUTE-UHFFFAOYSA-N	BERBERINE	P22303	Acetylcholinesterase	Known	6.3	---	---	---
QBKSWRVVCFFDOT-UHFFFAOYSA-N	GOSSYPOL	P15121	Aldose reductase	Known	6.3	---	---	---
YQUVCSBJEUQKSH-UHFFFAOYSA-N	PROTOCATECHUIC-ACID|3,4-DIHYDROXYBENZOIC-ACID|O-PROTOCATECHUIC-ACID	P00918	Carbonic anhydrase 2	Known	6.3	---	---	---
RLSSMJSEOOYNOY-UHFFFAOYSA-N	M-CRESOL|CRESOL	P22303	Acetylcholinesterase	Known	6.3	---	---	---
WQGWDDDVZFFDIG-UHFFFAOYSA-N	PYROGALLOL	P00918	Carbonic anhydrase 2	Known	6.3	---	---	---
VHRGRCVQAFMJIZ-UHFFFAOYSA-N	CADAVERINE	O43570	Carbonic anhydrase 12	Known	6.3	---	---	---
CDRPUGZCRXZLFL-OWOJBTEDSA-N	PICEATANNOL	P17948	Vascular endothelial growth factor receptor 1	Known	6.3	---	---	---
CDRPUGZCRXZLFL-OWOJBTEDSA-N	PICEATANNOL	Q5S007	Leucine-rich repeat serine/threonine-protein kinase 2	Known	6.3	---	---	---
KMPWYEUPVWOPIM-YNRGSOABSA-N	CINCHONIDINE	P33261	Cytochrome P450 2C19	Known	6.3	---	---	---
KMPWYEUPVWOPIM-QAMTZSDWSA-N	CINCHONINE	P33261	Cytochrome P450 2C19	Known	6.3	---	---	---
KMPWYEUPVWOPIM-KODHJQJWSA-N	CINCHONIDINE	P33261	Cytochrome P450 2C19	Known	6.3	---	---	---
KMPWYEUPVWOPIM-FGVBSWQGSA-N	CINCHONINE	P33261	Cytochrome P450 2C19	Known	6.3	---	---	---
KMPWYEUPVWOPIM-SPLQCWDRSA-N	CINCHONIDINE	P33261	Cytochrome P450 2C19	Known	6.3	---	---	---
QEVHRUUCFGRFIF-MDEJGZGSSA-N	RESERPINE	P35462	D(3) dopamine receptor	Known	6.2	---	---	---
RKUNBYITZUJHSG-JJXSEGSLSA-N	ATROPINE	Q12809	Potassium voltage-gated channel subfamily H member 2	Known	6.2	---	---	---
RKUNBYITZUJHSG-UHFFFAOYSA-N	ATROPINE|HYOSCYAMINE|L-HYOSCYAMINE	Q12809	Potassium voltage-gated channel subfamily H member 2	Known	6.2	---	---	---
RKUNBYITZUJHSG-PJPHBNEVSA-N	ATROPINE|HYOSCYAMINE	Q12809	Potassium voltage-gated channel subfamily H member 2	Known	6.2	---	---	---
DVGGLGXQSFURLP-VWMSDXGPSA-N	TILIROSIDE	P08684	Cytochrome P450 3A4	Known	6.2	---	---	---
JUVIOZPCNVVQFO-HBGVWJBISA-N	ROTENONE	P50406	5-hydroxytryptamine receptor 6	Known	6.2	---	---	---
RKUNBYITZUJHSG-QKPAOTATSA-N	HYOSCYAMINE	Q12809	Potassium voltage-gated channel subfamily H member 2	Known	6.2	---	---	---
DVGGLGXQSFURLP-NEGKXOQXSA-N	TILIROSIDE	P08684	Cytochrome P450 3A4	Known	6.2	---	---	---
KGSZHKRKHXOAMG-UHFFFAOYSA-N	HYPERIFOLIN	P21728	D(1A) dopamine receptor	Known	6.2	---	---	---
KGSZHKRKHXOAMG-HQKKAZOISA-N	HYPERIFOLIN	P21728	D(1A) dopamine receptor	Known	6.2	---	---	---
RKUNBYITZUJHSG-AUSYRVNMSA-N	ATROPINE|HYOSCYAMINE	Q12809	Potassium voltage-gated channel subfamily H member 2	Known	6.2	---	---	---
RKUNBYITZUJHSG-LGGPCSOHSA-N	ATROPINE|HYOSCYAMINE|L-HYOSCYAMINE	Q12809	Potassium voltage-gated channel subfamily H member 2	Known	6.2	---	---	---
RKUNBYITZUJHSG-VFSICIBPSA-N	ATROPINE|HYOSCYAMINE|L-HYOSCYAMINE	Q12809	Potassium voltage-gated channel subfamily H member 2	Known	6.2	---	---	---
WHUUTDBJXJRKMK-UHFFFAOYSA-N	GLUTAMIC-ACID	P0DMS8	Adenosine receptor A3	Known	6.2	---	---	---
WHUUTDBJXJRKMK-GSVOUGTGSA-N	GLUTAMIC-ACID	P0DMS8	Adenosine receptor A3	Known	6.2	---	---	---
KGSZHKRKHXOAMG-COGANRFPSA-N	HYPERIFOLIN	P21728	D(1A) dopamine receptor	Known	6.2	---	---	---
KGSZHKRKHXOAMG-JGVNVXBASA-N	HYPERIFOLIN	P21728	D(1A) dopamine receptor	Known	6.2	---	---	---
WHUUTDBJXJRKMK-VKHMYHEASA-N	GLUTAMIC-ACID|L-GLUTAMIC-ACID	P0DMS8	Adenosine receptor A3	Known	6.2	---	---	---
MUMGGOZAMZWBJJ-DYKIIFRCSA-N	TESTOSTERONE	P06401	Progesterone receptor	Known	6.2	---	---	---
KZNIFHPLKGYRTM-UHFFFAOYSA-N	APIGENIN	Q92731	Estrogen receptor beta	Known	6.2	---	---	---
MUMGGOZAMZWBJJ-KZYORJDKSA-N	EPITESTOSTERONE	P06401	Progesterone receptor	Known	6.2	---	---	---
DBPWSSGDRRHUNT-CEGNMAFCSA-N	17-ALPHA-HYDROXYPROGESTERONE|17-HYDROXYPROGESTERONE	P10275	Androgen receptor	Known	6.2	---	---	---
APJYDQYYACXCRM-UHFFFAOYSA-N	TRYPTAMINE	P28222	5-hydroxytryptamine receptor 1B	Known	6.2	---	---	---
SNICXCGAKADSCV-UHFFFAOYSA-N	NICOTINE	P02708	Acetylcholine receptor subunit alpha	Known	6.2	---	---	---
YNNUSGIPVFPVBX-NHCUHLMSSA-N	CLEMATINE	Q01959	Sodium-dependent dopamine transporter	Known	6.2	---	---	---
RHCSKNNOAZULRK-UHFFFAOYSA-N	MESCALINE	P28335	5-hydroxytryptamine receptor 2C	Known	6.2	---	---	---
APJYDQYYACXCRM-UHFFFAOYSA-N	TRYPTAMINE	P28223	5-hydroxytryptamine receptor 2A	Known	6.2	---	---	---
NTYJJOPFIAHURM-UHFFFAOYSA-N	HISTAMINE	P35367	Histamine H1 receptor	Known	6.2	---	---	---
HCZKYJDFEPMADG-TXEJJXNPSA-N	NORDIHYDROGUAIARETIC-ACID	P16050	Arachidonate 15-lipoxygenase	Known	6.2	---	---	---
HCZKYJDFEPMADG-VXGBXAGGSA-N	NORDIHYDROGUAIARETIC-ACID	P16050	Arachidonate 15-lipoxygenase	Known	6.2	---	---	---
TZBJGXHYKVUXJN-UHFFFAOYSA-N	1,3,7-TRIHYDROXYXANTHONE|GENISTEIN	P03372	Estrogen receptor	Known	6.2	---	---	---
CUFLZUDASVUNOE-UHFFFAOYSA-N	METHYL-3,4-DIHYDROXYBENZOATE|PROTOCATECHUIC-ACID-METHYL-ESTER	P00918	Carbonic anhydrase 2	Known	6.2	---	---	---
REFJWTPEDVJJIY-UHFFFAOYSA-N	QUERCETIN|QUERCETOL	P36888	Receptor-type tyrosine-protein kinase FLT3	Known	6.2	---	---	---
ZQPPMHVWECSIRJ-KTKRTIGZSA-N	OLEIC-ACID	Q07869	Peroxisome proliferator-activated receptor alpha	Known	6.2	---	---	---
ZQPPMHVWECSIRJ-MDZDMXLPSA-N	ELAIDIC-ACID	Q07869	Peroxisome proliferator-activated receptor alpha	Known	6.2	---	---	---
VLEUZFDZJKSGMX-ONEGZZNKSA-N	PTEROSTILBENE	P04798	Cytochrome P450 1A1	Known	6.2	---	---	---
VLEUZFDZJKSGMX-ONEGZZNKSA-N	PTEROSTILBENE	P23219	Prostaglandin G/H synthase 1	Known	6.2	---	---	---
IYRMWMYZSQPJKC-UHFFFAOYSA-N	KAEMPFEROL|TRIFOLITIN	P04798	Cytochrome P450 1A1	Known	6.2	---	---	---
IJFXRHURBJZNAO-UHFFFAOYSA-N	3-HYDROXYBENZOIC-ACID|M-HYDROXYBENZOIC-ACID	P00918	Carbonic anhydrase 2	Known	6.2	---	---	---
KZNIFHPLKGYRTM-UHFFFAOYSA-N	APIGENIN	P47989	Xanthine dehydrogenase/oxidase	Known	6.2	---	---	---
NLZUEZXRPGMBCV-UHFFFAOYSA-N	BUTYLATED-HYDROXY-TOLUENE	P00918	Carbonic anhydrase 2	Known	6.2	---	---	---
MUMGGOZAMZWBJJ-DYKIIFRCSA-N	TESTOSTERONE	P11511	Aromatase	Known	6.2	---	---	---
MUMGGOZAMZWBJJ-KZYORJDKSA-N	EPITESTOSTERONE	P11511	Aromatase	Known	6.2	---	---	---
XHEFDIBZLJXQHF-UHFFFAOYSA-N	FISETIN	Q00535	Cyclin-dependent-like kinase 5	Known	6.2	---	---	---
KDKROYXEHCYLJQ-JTVQXPTQSA-N	GINKGOLIDE-M	P23415	Glycine receptor subunit alpha-1	Known	6.2	---	---	---
LLENXGNWVNSBQG-VFTFQOQOSA-N	TRIGALLOYL-GLUCOSE	Q14534	Squalene monooxygenase	Known	6.2	---	---	---
REFJWTPEDVJJIY-UHFFFAOYSA-N	QUERCETIN|QUERCETOL	P09917	Arachidonate 5-lipoxygenase	Known	6.2	---	---	---
WMBWREPUVVBILR-GHTZIAJQSA-N	GALLOCATECHIN-3-O-GALLATE	P56817	Beta-secretase 1	Known	6.2	---	---	---
WMBWREPUVVBILR-NQIIRXRSSA-N	GALLOCATECHIN-GALLATE|(-)-GALLOCATECHIN-GALLATE|GALLOCATECHOL	P56817	Beta-secretase 1	Known	6.2	---	---	---
AFSDNFLWKVMVRB-UHFFFAOYSA-N	ELLAGIC-ACID	P17612	cAMP-dependent protein kinase catalytic subunit alpha	Known	6.2	---	---	---
AKNNEGZIBPJZJG-ZWKOTPCHSA-N	NARCOTINE|GNOSCOPINE|(-)-ALPHA-NARCOTINE	P33261	Cytochrome P450 2C19	Known	6.2	---	---	---
AKNNEGZIBPJZJG-UHFFFAOYSA-N	(-)-ALPHA-NARCOTINE|GNOSCOPINE|NARCOTINE|NOSCAPINE	P33261	Cytochrome P450 2C19	Known	6.2	---	---	---
QEVHRUUCFGRFIF-MDEJGZGSSA-N	RESERPINE	P14416	D(2) dopamine receptor	Known	6.2	---	---	---
AFSDNFLWKVMVRB-UHFFFAOYSA-N	ELLAGIC-ACID	P00533	Epidermal growth factor receptor	Known	6.2	---	---	---
WMBWREPUVVBILR-WIYYLYMNSA-N	EPI-GALLOCATECHIN-3-O-GALLATE|(-)-EPIGALLOCATECHIN-GALLATE|EPIGALLOCATECHIN-GALLATE|EPIGALLOCATECHIN-3-GALLATE|EPIGALLOCATECHOL-GALLATE|(-)-EPIGALLOCATECHIN-3-GALLATE|EPIGALLOCATECHIN-3-O-GALLATE|(-)-EPIGALLOCATECHIN-3-O-GALLATE|(-)-EPIGALLOCATECHOL-GALLATE	Q14534	Squalene monooxygenase	Known	6.2	---	---	---
WMBWREPUVVBILR-NQIIRXRSSA-N	GALLOCATECHIN-GALLATE|(-)-GALLOCATECHIN-GALLATE|GALLOCATECHOL	Q14534	Squalene monooxygenase	Known	6.2	---	---	---
WMBWREPUVVBILR-GHTZIAJQSA-N	GALLOCATECHIN-3-O-GALLATE	Q14534	Squalene monooxygenase	Known	6.2	---	---	---
TUSDEZXZIZRFGC-XIGLUPEJSA-N	CORILAGIN	P63316	Troponin C, slow skeletal and cardiac muscles	Known	6.2	---	---	---
TUSDEZXZIZRFGC-VWUIOQLHSA-N	CORILAGIN	P63316	Troponin C, slow skeletal and cardiac muscles	Known	6.2	---	---	---
ZCCUUQDIBDJBTK-UHFFFAOYSA-N	PSORALEN	P11509	Cytochrome P450 2A6	Known	6.2	---	---	---
IKMDFBPHZNJCSN-UHFFFAOYSA-N	MYRICETIN	P22303	Acetylcholinesterase	Known	6.2	---	---	---
WDJUZGPOPHTGOT-UHFFFAOYSA-N	DIGITOXIN	P40763	Signal transducer and activator of transcription 3	Known	6.2	---	---	---
WDJUZGPOPHTGOT-CNIDYCFQSA-N	DIGITOXIN	P40763	Signal transducer and activator of transcription 3	Known	6.2	---	---	---
CHBITXAMNKHJCR-JNUHSSLSSA-N	CASUARIIN	P00742	Coagulation factor X	Known	6.2	---	---	---
WDJUZGPOPHTGOT-VEBSLOLJSA-N	DIGITOXIN	P40763	Signal transducer and activator of transcription 3	Known	6.2	---	---	---
UHIGZYLCYRQESL-VJWFJHQPSA-N	CALCEOLARIOSIDE-A	P17252	Protein kinase C alpha type	Known	6.2	---	---	---
KTEXNACQROZXEV-PVLRGYAZSA-N	PARTHENOLIDE	P35354	Prostaglandin G/H synthase 2	Known	6.1	---	---	---
RKUNBYITZUJHSG-JJXSEGSLSA-N	ATROPINE	P28335	5-hydroxytryptamine receptor 2C	Known	6.1	---	---	---
KTEXNACQROZXEV-SLXBATTESA-N	PARTHENOLIDE	P35354	Prostaglandin G/H synthase 2	Known	6.1	---	---	---
KTEXNACQROZXEV-QLIGOWBFSA-N	PARTHENOLIDE	P35354	Prostaglandin G/H synthase 2	Known	6.1	---	---	---
RKUNBYITZUJHSG-UHFFFAOYSA-N	ATROPINE|HYOSCYAMINE|L-HYOSCYAMINE	P28335	5-hydroxytryptamine receptor 2C	Known	6.1	---	---	---
HNDVDQJCIGZPNO-YFKPBYRVSA-N	L-HISTIDINE|HISTIDINE	P08684	Cytochrome P450 3A4	Known	6.1	---	---	---
HNDVDQJCIGZPNO-UHFFFAOYSA-N	HISTIDINE	P08684	Cytochrome P450 3A4	Known	6.1	---	---	---
YUSWMAULDXZHPY-UHFFFAOYSA-N	AMENTOFLAVONE|BIAPIGENIN	Q01959	Sodium-dependent dopamine transporter	Known	6.1	---	---	---
RKUNBYITZUJHSG-AUSYRVNMSA-N	ATROPINE|HYOSCYAMINE	P28335	5-hydroxytryptamine receptor 2C	Known	6.1	---	---	---
RKUNBYITZUJHSG-LGGPCSOHSA-N	ATROPINE|HYOSCYAMINE|L-HYOSCYAMINE	P28335	5-hydroxytryptamine receptor 2C	Known	6.1	---	---	---
YBHILYKTIRIUTE-UHFFFAOYSA-N	BERBERINE	Q99720	Sigma non-opioid intracellular receptor 1	Known	6.1	---	---	---
RKUNBYITZUJHSG-PJPHBNEVSA-N	ATROPINE|HYOSCYAMINE	P28335	5-hydroxytryptamine receptor 2C	Known	6.1	---	---	---
RKUNBYITZUJHSG-QKPAOTATSA-N	HYOSCYAMINE	P28335	5-hydroxytryptamine receptor 2C	Known	6.1	---	---	---
RKUNBYITZUJHSG-VFSICIBPSA-N	ATROPINE|HYOSCYAMINE|L-HYOSCYAMINE	P28335	5-hydroxytryptamine receptor 2C	Known	6.1	---	---	---
MYKUKUCHPMASKF-SECBINFHSA-N	NORNICOTINE|(+)-NORNICOTINE	P36544	Neuronal acetylcholine receptor subunit alpha-7	Known	6.1	---	---	---
MYKUKUCHPMASKF-VIFPVBQESA-N	NORNICOTINE	P36544	Neuronal acetylcholine receptor subunit alpha-7	Known	6.1	---	---	---
QHMBSVQNZZTUGM-ZWKOTPCHSA-N	CANNABIDIOL|CANNIBIDIOL	P34972	Cannabinoid receptor 2	Known	6.1	---	---	---
LUKBXSAWLPMMSZ-OWOJBTEDSA-N	TRANS-RESVERATROL|RESVERATROL	P03372	Estrogen receptor	Known	6.1	---	---	---
LUKBXSAWLPMMSZ-UPHRSURJSA-N	RESVERATROL|CIS-RESVERATROL	P03372	Estrogen receptor	Known	6.1	---	---	---
LODGIKWNLDQZBM-LBPRGKRZSA-N	BULBOCAPNINE	P21728	D(1A) dopamine receptor	Known	6.1	---	---	---
OROGSEYTTFOCAN-DNJOTXNNSA-N	CODEINE	P35372	Mu-type opioid receptor	Known	6.1	---	---	---
SGTCGCCQZOUMJJ-YMILTQATSA-N	SCOPOLIN	O43570	Carbonic anhydrase 12	Known	6.1	---	---	---
SGTCGCCQZOUMJJ-YJUJGKJLSA-N	SCOPOLIN	O43570	Carbonic anhydrase 12	Known	6.1	---	---	---
SFLSHLFXELFNJZ-QMMMGPOBSA-N	L-NORADRENALINE|L-NORADRENALIN|NOREPINEPHRINE	P08588	Beta-1 adrenergic receptor	Known	6.1	---	---	---
APJYDQYYACXCRM-UHFFFAOYSA-N	TRYPTAMINE	P08908	5-hydroxytryptamine receptor 1A	Known	6.1	---	---	---
SFLSHLFXELFNJZ-UHFFFAOYSA-N	NOREPINEPHRINE	P34969	5-hydroxytryptamine receptor 7	Known	6.1	---	---	---
SFLSHLFXELFNJZ-QMMMGPOBSA-N	L-NORADRENALINE|L-NORADRENALIN|NOREPINEPHRINE	P34969	5-hydroxytryptamine receptor 7	Known	6.1	---	---	---
MXXWOMGUGJBKIW-PORYWJCVSA-N	CHAVICINE	P27338	Amine oxidase [flavin-containing] B	Known	6.1	---	---	---
MXXWOMGUGJBKIW-YPCIICBESA-N	PIPERINE	P27338	Amine oxidase [flavin-containing] B	Known	6.1	---	---	---
MXXWOMGUGJBKIW-BPMFVRGZSA-N	ISOPIPERINE	P27338	Amine oxidase [flavin-containing] B	Known	6.1	---	---	---
ORHBXUUXSCNDEV-UHFFFAOYSA-N	UMBELLIFERONE|7-HYDROXYCOUMARIN	O43570	Carbonic anhydrase 12	Known	6.1	---	---	---
VZCCETWTMQHEPK-YHTMAJSVSA-N	GAMMA-LINOLENIC-ACID	Q03181	Peroxisome proliferator-activated receptor delta	Known	6.1	---	---	---
VZCCETWTMQHEPK-QNEBEIHSSA-N	GAMOLENIC-ACID|GAMMA-LINOLENIC-ACID|CIS-GAMMA-LINOLENIC-ACID	Q03181	Peroxisome proliferator-activated receptor delta	Known	6.1	---	---	---
VYFYYTLLBUKUHU-UHFFFAOYSA-N	DOPAMINE	P34969	5-hydroxytryptamine receptor 7	Known	6.1	---	---	---
NITWSHWHQAQBAW-QPJJXVBHSA-N	METHYL-4-HYDROXY-CINNAMATE|METHYL-P-HYDROXYCINNAMATE|P-HYDROXYCINNAMIC-ACID-METHYL-ESTER	O43570	Carbonic anhydrase 12	Known	6.1	---	---	---
JNELGWHKGNBSMD-UHFFFAOYSA-N	XANTHONE	P21397	Amine oxidase [flavin-containing] A	Known	6.1	---	---	---
PEFNSGRTCBGNAN-OFOKGCAXSA-N	LUTEOLIN-7-GALACTOSIDE	P01375	Tumor necrosis factor	Known	6.1	---	---	---
PEFNSGRTCBGNAN-UHFFFAOYSA-N	CYNAROSIDE|LUTEOLIN-7-O-MONOGLUCOSIDE|LUTEOLIN-7-O-BETA-D-GLUCOPYRANOSIDE|LUTEOLIN-7-GLUCOSIDE|CYANAROSIDE	P01375	Tumor necrosis factor	Known	6.1	---	---	---
PEFNSGRTCBGNAN-QNDFHXLGSA-N	CYNAROSIDE|LUTEOLIN-7-GLUCOSIDE|LUTEOLIN-7-O-MONOGLUCOSIDE|CYANAROSIDE|LUTEOLIN-7-O-BETA-D-GLUCOSIDE|LUTEOLIN-7-O-GLUCOSIDE|LUTEOLIN-7-D-GLUCOSIDE|CINAROSIDE	P01375	Tumor necrosis factor	Known	6.1	---	---	---
WHUUTDBJXJRKMK-VKHMYHEASA-N	GLUTAMIC-ACID|L-GLUTAMIC-ACID	Q05586	Glutamate receptor ionotropic, NMDA 1	Known	6.1	---	---	---
IQPNAANSBPBGFQ-UHFFFAOYSA-N	LUTEOLIN|LUTEOLOL	P49841	Glycogen synthase kinase-3 beta	Known	6.1	---	---	---
NITWSHWHQAQBAW-QPJJXVBHSA-N	METHYL-4-HYDROXY-CINNAMATE|METHYL-P-HYDROXYCINNAMATE|P-HYDROXYCINNAMIC-ACID-METHYL-ESTER	P00918	Carbonic anhydrase 2	Known	6.1	---	---	---
LXCFILQKKLGQFO-UHFFFAOYSA-N	4-HYDROXYBENZOIC-ACID-METHYL-ESTER|METHYL-4-HYDROXYBENZOATE	O43570	Carbonic anhydrase 12	Known	6.1	---	---	---
BXNJHAXVSOCGBA-UHFFFAOYSA-N	HARMINE	P18825	Alpha-2C adrenergic receptor	Known	6.1	---	---	---
SFLSHLFXELFNJZ-QMMMGPOBSA-N	L-NORADRENALINE|L-NORADRENALIN|NOREPINEPHRINE	P28223	5-hydroxytryptamine receptor 2A	Known	6.1	---	---	---
IQPNAANSBPBGFQ-UHFFFAOYSA-N	LUTEOLIN|LUTEOLOL	P36888	Receptor-type tyrosine-protein kinase FLT3	Known	6.1	---	---	---
RTIXKCRFFJGDFG-UHFFFAOYSA-N	CHRYSIN	P47989	Xanthine dehydrogenase/oxidase	Known	6.1	---	---	---
IQPNAANSBPBGFQ-UHFFFAOYSA-N	LUTEOLIN|LUTEOLOL	P49840	Glycogen synthase kinase-3 alpha	Known	6.1	---	---	---
VLEUZFDZJKSGMX-ONEGZZNKSA-N	PTEROSTILBENE	P35354	Prostaglandin G/H synthase 2	Known	6.1	---	---	---
FMHHVULEAZTJMA-UHFFFAOYSA-N	4,8,5'-TRIMETHYLPSORALEN	P21397	Amine oxidase [flavin-containing] A	Known	6.1	---	---	---
HFGSQOYIOKBQOW-DEKTUAPHSA-N	2-HYDROXYURSOLIC-ACID	P28845	Corticosteroid 11-beta-dehydrogenase isozyme 1	Known	6.1	---	---	---
HFGSQOYIOKBQOW-YMSASPJVSA-N	2-HYDROXYURSOLIC-ACID	P28845	Corticosteroid 11-beta-dehydrogenase isozyme 1	Known	6.1	---	---	---
HFGSQOYIOKBQOW-FCPFUEDDSA-N	2-HYDROXYURSOLIC-ACID	P28845	Corticosteroid 11-beta-dehydrogenase isozyme 1	Known	6.1	---	---	---
HFGSQOYIOKBQOW-ZSDYHTTISA-N	2ALPHA-HYDROXYURSOLIC-ACID	P28845	Corticosteroid 11-beta-dehydrogenase isozyme 1	Known	6.1	---	---	---
VCCRNZQBSJXYJD-UHFFFAOYSA-N	GALANGIN	P30542	Adenosine receptor A1	Known	6.1	---	---	---
FURUXTVZLHCCNA-AWEZNQCLSA-N	LIQUIRITIGENIN	P11511	Aromatase	Known	6.1	---	---	---
FURUXTVZLHCCNA-CQSZACIVSA-N	LIQUIRITIGENIN	P11511	Aromatase	Known	6.1	---	---	---
FURUXTVZLHCCNA-UHFFFAOYSA-N	LIQUIRITIGENIN	P11511	Aromatase	Known	6.1	---	---	---
UQOFGTXDASPNLL-XHNCKOQMSA-N	MUSCARINE	P11229	Muscarinic acetylcholine receptor M1	Known	6.1	---	---	---
YNWXJFQOCHMPCK-LXGDFETPSA-N	NEOISOLIQUIRITIN|ISOLIQUIRITIN	P15121	Aldose reductase	Known	6.1	---	---	---
AFSDNFLWKVMVRB-UHFFFAOYSA-N	ELLAGIC-ACID	P35968	Vascular endothelial growth factor receptor 2	Known	6.1	---	---	---
KZNIFHPLKGYRTM-UHFFFAOYSA-N	APIGENIN	P68400	Casein kinase II subunit alpha	Known	6.1	---	---	---
RTIXKCRFFJGDFG-UHFFFAOYSA-N	CHRYSIN	P33261	Cytochrome P450 2C19	Known	6.1	---	---	---
PUAQLLVFLMYYJJ-ZETCQYMHSA-N	CHATININE	P18825	Alpha-2C adrenergic receptor	Known	6.1	---	---	---
PUAQLLVFLMYYJJ-UHFFFAOYSA-N	CHATININE	P18825	Alpha-2C adrenergic receptor	Known	6.1	---	---	---
RERZNCLIYCABFS-UHFFFAOYSA-N	HARMALINE	P05177	Cytochrome P450 1A2	Known	6.1	---	---	---
YCIMNLLNPGFGHC-UHFFFAOYSA-N	CATECHOL|PYROCATECHOL	P16050	Arachidonate 15-lipoxygenase	Known	6.1	---	---	---
KLAOKWJLUQKWIF-UHFFFAOYSA-N	EUPATORIN	P35968	Vascular endothelial growth factor receptor 2	Known	6.1	---	---	---
BXNJHAXVSOCGBA-UHFFFAOYSA-N	HARMINE	P50750	Cyclin-dependent kinase 9	Known	6.1	---	---	---
IYMHVUYNBVWXKH-ZITZVVOASA-N	PEDUNCULAGIN	P00742	Coagulation factor X	Known	6.1	---	---	---
IYMHVUYNBVWXKH-MMQHQYPESA-N	PEDUNCULAGIN	P00742	Coagulation factor X	Known	6.1	---	---	---
IYMHVUYNBVWXKH-UHFFFAOYSA-N	PEDUNCULAGIN	P00742	Coagulation factor X	Known	6.1	---	---	---
CDRPUGZCRXZLFL-OWOJBTEDSA-N	PICEATANNOL	Q04759	Protein kinase C theta type	Known	6.1	---	---	---
CDRPUGZCRXZLFL-OWOJBTEDSA-N	PICEATANNOL	Q9UQM7	Calcium/calmodulin-dependent protein kinase type II subunit alpha	Known	6.1	---	---	---
VEZXFTKZUMARDU-UHFFFAOYSA-N	GAMMA-MANGOSTIN	P23219	Prostaglandin G/H synthase 1	Known	6.1	---	---	---
YBHILYKTIRIUTE-UHFFFAOYSA-N	BERBERINE	Q13639	5-hydroxytryptamine receptor 4	Known	6.0	---	---	---
QTBSBXVTEAMEQO-UHFFFAOYSA-N	ACETIC-ACID|DECAN-1-AL	P06241	Tyrosine-protein kinase Fyn	Known	6.0	---	---	---
VYFYYTLLBUKUHU-UHFFFAOYSA-N	DOPAMINE	P21554	Cannabinoid receptor 1	Known	6.0	---	---	---
RKUNBYITZUJHSG-PJPHBNEVSA-N	ATROPINE|HYOSCYAMINE	P25100	Alpha-1D adrenergic receptor	Known	6.0	---	---	---
BTCSSZJGUNDROE-UHFFFAOYSA-N	4-AMINO-BUTYRIC-ACID|GAMMA-AMINOBUTYRIC-ACID	P21554	Cannabinoid receptor 1	Known	6.0	---	---	---
CWVRJTMFETXNAD-JUHZACGLSA-N	CHLOROGENIC-ACID|CAFFEOYLQUINIC-ACID|ISOCHLOROGENIC-ACID|3-O-CAFFEOYLQUINIC-ACID|TRANS-CHLOROGENIC-ACID|3-CAFFEOYLQUINIC-ACID	P15121	Aldose reductase	Known	6.0	---	---	---
RKUNBYITZUJHSG-VFSICIBPSA-N	ATROPINE|HYOSCYAMINE|L-HYOSCYAMINE	P25100	Alpha-1D adrenergic receptor	Known	6.0	---	---	---
WHUUTDBJXJRKMK-UHFFFAOYSA-N	GLUTAMIC-ACID	P21554	Cannabinoid receptor 1	Known	6.0	---	---	---
RKUNBYITZUJHSG-UHFFFAOYSA-N	ATROPINE|HYOSCYAMINE|L-HYOSCYAMINE	P25100	Alpha-1D adrenergic receptor	Known	6.0	---	---	---
RKUNBYITZUJHSG-QKPAOTATSA-N	HYOSCYAMINE	P25100	Alpha-1D adrenergic receptor	Known	6.0	---	---	---
RKUNBYITZUJHSG-JJXSEGSLSA-N	ATROPINE	P25100	Alpha-1D adrenergic receptor	Known	6.0	---	---	---
BQJCRHHNABKAKU-KBQPJGBKSA-N	MORPHINE	P21554	Cannabinoid receptor 1	Known	6.0	---	---	---
RJKFOVLPORLFTN-STHVQZNPSA-N	PROGESTERONE	Q99720	Sigma non-opioid intracellular receptor 1	Known	6.0	---	---	---
WHUUTDBJXJRKMK-GSVOUGTGSA-N	GLUTAMIC-ACID	P21554	Cannabinoid receptor 1	Known	6.0	---	---	---
RJKFOVLPORLFTN-LEKSSAKUSA-N	PROGESTERONE	Q99720	Sigma non-opioid intracellular receptor 1	Known	6.0	---	---	---
VYFYYTLLBUKUHU-UHFFFAOYSA-N	DOPAMINE	P29275	Adenosine receptor A2b	Known	6.0	---	---	---
WHUUTDBJXJRKMK-VKHMYHEASA-N	GLUTAMIC-ACID|L-GLUTAMIC-ACID	P21554	Cannabinoid receptor 1	Known	6.0	---	---	---
RKUNBYITZUJHSG-AUSYRVNMSA-N	ATROPINE|HYOSCYAMINE	P25100	Alpha-1D adrenergic receptor	Known	6.0	---	---	---
DRLFMBDRBRZALE-UHFFFAOYSA-N	MELATONIN	P47898	5-hydroxytryptamine receptor 5A	Known	6.0	---	---	---
OIPILFWXSMYKGL-UHFFFAOYSA-N	CHOLINE	P21554	Cannabinoid receptor 1	Known	6.0	---	---	---
RKUNBYITZUJHSG-LGGPCSOHSA-N	ATROPINE|HYOSCYAMINE|L-HYOSCYAMINE	P25100	Alpha-1D adrenergic receptor	Known	6.0	---	---	---
MTXSIJUGVMTTMU-JTQLQIEISA-N	ANABASINE|(-)-ANABASINE	P36544	Neuronal acetylcholine receptor subunit alpha-7	Known	6.0	---	---	---
KZNIFHPLKGYRTM-UHFFFAOYSA-N	APIGENIN	P03372	Estrogen receptor	Known	6.0	---	---	---
JKPISQIIWUONPB-UHFFFAOYSA-N	STEPHOLIDINE	P14416	D(2) dopamine receptor	Known	6.0	---	---	---
JAZBEHYOTPTENJ-JLNKQSITSA-N	EICOSAPENTAENOIC-ACID	Q07869	Peroxisome proliferator-activated receptor alpha	Known	6.0	---	---	---
VMWNQDUVQKEIOC-CYBMUJFWSA-N	APOMORPHINE	P08908	5-hydroxytryptamine receptor 1A	Known	6.0	---	---	---
KWGRBVOPPLSCSI-WPRPVWTQSA-N	EPHEDRINE	P18825	Alpha-2C adrenergic receptor	Known	6.0	---	---	---
KWGRBVOPPLSCSI-WCBMZHEXSA-N	EPHEDRINE	P18825	Alpha-2C adrenergic receptor	Known	6.0	---	---	---
KWGRBVOPPLSCSI-PSASIEDQSA-N	EPHEDRINE	P18825	Alpha-2C adrenergic receptor	Known	6.0	---	---	---
CUFLZUDASVUNOE-UHFFFAOYSA-N	METHYL-3,4-DIHYDROXYBENZOATE|PROTOCATECHUIC-ACID-METHYL-ESTER	O43570	Carbonic anhydrase 12	Known	6.0	---	---	---
SFLSHLFXELFNJZ-QMMMGPOBSA-N	L-NORADRENALINE|L-NORADRENALIN|NOREPINEPHRINE	P25100	Alpha-1D adrenergic receptor	Known	6.0	---	---	---
TZBJGXHYKVUXJN-UHFFFAOYSA-N	1,3,7-TRIHYDROXYXANTHONE|GENISTEIN	P27338	Amine oxidase [flavin-containing] B	Known	6.0	---	---	---
IHFBPDAQLQOCBX-UHFFFAOYSA-N	HISPIDULIN|DINATIN	P18507	Gamma-aminobutyric acid receptor subunit gamma-2	Known	6.0	---	---	---
IHFBPDAQLQOCBX-UHFFFAOYSA-N	HISPIDULIN|DINATIN	P14867	Gamma-aminobutyric acid receptor subunit alpha-1	Known	6.0	---	---	---
IHFBPDAQLQOCBX-UHFFFAOYSA-N	HISPIDULIN|DINATIN	P47870	Gamma-aminobutyric acid receptor subunit beta-2	Known	6.0	---	---	---
IYRMWMYZSQPJKC-UHFFFAOYSA-N	KAEMPFEROL|TRIFOLITIN	P47989	Xanthine dehydrogenase/oxidase	Known	6.0	---	---	---
XHEFDIBZLJXQHF-UHFFFAOYSA-N	FISETIN	P18054	Arachidonate 12-lipoxygenase, 12S-type	Known	6.0	---	---	---
IQPNAANSBPBGFQ-UHFFFAOYSA-N	LUTEOLIN|LUTEOLOL	P15121	Aldose reductase	Known	6.0	---	---	---
BXNJHAXVSOCGBA-UHFFFAOYSA-N	HARMINE	P18089	Alpha-2B adrenergic receptor	Known	6.0	---	---	---
YXWQTVWJNHKSCC-UHFFFAOYSA-N	TETRAHYDROPAPAVERINE	P08588	Beta-1 adrenergic receptor	Known	6.0	---	---	---
YXWQTVWJNHKSCC-MRXNPFEDSA-N	TETRAHYDROPAPAVERINE	P08588	Beta-1 adrenergic receptor	Known	6.0	---	---	---
IQPNAANSBPBGFQ-UHFFFAOYSA-N	LUTEOLIN|LUTEOLOL	P04798	Cytochrome P450 1A1	Known	6.0	---	---	---
REFJWTPEDVJJIY-UHFFFAOYSA-N	QUERCETIN|QUERCETOL	P04798	Cytochrome P450 1A1	Known	6.0	---	---	---
JSJIIHRNDMLJGK-UHFFFAOYSA-N	XANTHOXYLETIN	O43570	Carbonic anhydrase 12	Known	6.0	---	---	---
ANJTVLIZGCUXLD-RKDXNWHRSA-N	CYTISINE	P36544	Neuronal acetylcholine receptor subunit alpha-7	Known	6.0	---	---	---
UOFNVZWWIXXTMZ-UHFFFAOYSA-N	BRAYLIN	Q08499	cAMP-specific 3',5'-cyclic phosphodiesterase 4D	Known	6.0	---	---	---
SCZVLDHREVKTSH-UHFFFAOYSA-N	CHRYSOERIOL	P05177	Cytochrome P450 1A2	Known	6.0	---	---	---
IQPNAANSBPBGFQ-UHFFFAOYSA-N	LUTEOLIN|LUTEOLOL	P05177	Cytochrome P450 1A2	Known	6.0	---	---	---
DANYIYRPLHHOCZ-UHFFFAOYSA-N	APIGENIN-4'-METHYL-ETHER|ACACETIN	P33261	Cytochrome P450 2C19	Known	6.0	---	---	---
HCZKYJDFEPMADG-TXEJJXNPSA-N	NORDIHYDROGUAIARETIC-ACID	P08069	Insulin-like growth factor 1 receptor	Known	6.0	---	---	---
HCZKYJDFEPMADG-VXGBXAGGSA-N	NORDIHYDROGUAIARETIC-ACID	P08069	Insulin-like growth factor 1 receptor	Known	6.0	---	---	---
HCZKYJDFEPMADG-UHFFFAOYSA-N	NORDIHYDROGUAIARETIC-ACID	P08069	Insulin-like growth factor 1 receptor	Known	6.0	---	---	---
AKNNEGZIBPJZJG-MSOLQXFVSA-N	(-)-ALPHA-NARCOTINE|NARCOTINE|NOSCAPINE	P11712	Cytochrome P450 2C9	Known	6.0	---	---	---
QHGUCRYDKWKLMG-QMMMGPOBSA-N	OCTOPAMINE	P34969	5-hydroxytryptamine receptor 7	Known	6.0	---	---	---
QHGUCRYDKWKLMG-UHFFFAOYSA-N	OCTOPAMINE	P34969	5-hydroxytryptamine receptor 7	Known	6.0	---	---	---
QHGUCRYDKWKLMG-MRVPVSSYSA-N	OCTOPAMINE	P34969	5-hydroxytryptamine receptor 7	Known	6.0	---	---	---
SFLSHLFXELFNJZ-QMMMGPOBSA-N	L-NORADRENALINE|L-NORADRENALIN|NOREPINEPHRINE	P13945	Beta-3 adrenergic receptor	Known	6.0	---	---	---
XHEFDIBZLJXQHF-UHFFFAOYSA-N	FISETIN	Q965D5	Enoyl-acyl-carrier protein reductase	Known	6.0	---	---	---
COLNVLDHVKWLRT-UHFFFAOYSA-N	PHENYLALANINE	P54289	Voltage-dependent calcium channel subunit alpha-2/delta-1	Known	6.0	---	---	---
COLNVLDHVKWLRT-MRVPVSSYSA-N	PHENYLALANINE	P54289	Voltage-dependent calcium channel subunit alpha-2/delta-1	Known	6.0	---	---	---
COLNVLDHVKWLRT-QMMMGPOBSA-N	PHENYLALANINE	P54289	Voltage-dependent calcium channel subunit alpha-2/delta-1	Known	6.0	---	---	---
QIQXTHQIDYTFRH-UHFFFAOYSA-N	STEARIC-ACID	Q07869	Peroxisome proliferator-activated receptor alpha	Known	6.0	---	---	---
SFLSHLFXELFNJZ-QMMMGPOBSA-N	L-NORADRENALINE|L-NORADRENALIN|NOREPINEPHRINE	P35348	Alpha-1A adrenergic receptor	Known	6.0	---	---	---
REFJWTPEDVJJIY-UHFFFAOYSA-N	QUERCETIN|QUERCETOL	P05177	Cytochrome P450 1A2	Known	6.0	---	---	---
YXWQTVWJNHKSCC-MRXNPFEDSA-N	TETRAHYDROPAPAVERINE	P07550	Beta-2 adrenergic receptor	Known	6.0	---	---	---
YXWQTVWJNHKSCC-UHFFFAOYSA-N	TETRAHYDROPAPAVERINE	P07550	Beta-2 adrenergic receptor	Known	6.0	---	---	---
LLEJIEBFSOEYIV-UHFFFAOYSA-N	CHELERYTHRINE	P22303	Acetylcholinesterase	Known	6.0	---	---	---
IQPNAANSBPBGFQ-UHFFFAOYSA-N	LUTEOLIN|LUTEOLOL	P39900	Macrophage metalloelastase	Known	6.0	---	---	---
KQPYUDDGWXQXHS-UHFFFAOYSA-N	JUGLONE|5-HYDROXY-1,4-NAPHTHOQUINONE	P14902	Indoleamine 2,3-dioxygenase 1	Known	6.0	---	---	---
WMBWREPUVVBILR-WIYYLYMNSA-N	EPI-GALLOCATECHIN-3-O-GALLATE|(-)-EPIGALLOCATECHIN-GALLATE|EPIGALLOCATECHIN-GALLATE|EPIGALLOCATECHIN-3-GALLATE|EPIGALLOCATECHOL-GALLATE|(-)-EPIGALLOCATECHIN-3-GALLATE|EPIGALLOCATECHIN-3-O-GALLATE|(-)-EPIGALLOCATECHIN-3-O-GALLATE|(-)-EPIGALLOCATECHOL-GALLATE	P56817	Beta-secretase 1	Known	6.0	---	---	---
PUAQLLVFLMYYJJ-UHFFFAOYSA-N	CHATININE	P18089	Alpha-2B adrenergic receptor	Known	6.0	---	---	---
QZAYGJVTTNCVMB-UHFFFAOYSA-N	SEROTONIN|5-HYDROXYTRYPTAMINE	P35462	D(3) dopamine receptor	Known	6.0	---	---	---
VCCRNZQBSJXYJD-UHFFFAOYSA-N	GALANGIN	P29275	Adenosine receptor A2b	Known	6.0	---	---	---
QWCNQXNAFCBLLV-YWALDVPYSA-N	FALCARINDIOL	P35372	Mu-type opioid receptor	Known	6.0	---	---	---
QWCNQXNAFCBLLV-GXDHUFHOSA-N	FALCARINDIOL	P35372	Mu-type opioid receptor	Known	6.0	---	---	---
DRLFMBDRBRZALE-UHFFFAOYSA-N	MELATONIN	P34969	5-hydroxytryptamine receptor 7	Known	6.0	---	---	---
QWCNQXNAFCBLLV-KPJVXMDVSA-N	FALCARINDIOL	P41143	Delta-type opioid receptor	Known	6.0	---	---	---
QWCNQXNAFCBLLV-GXDHUFHOSA-N	FALCARINDIOL	P41143	Delta-type opioid receptor	Known	6.0	---	---	---
YBHILYKTIRIUTE-UHFFFAOYSA-N	BERBERINE	P18825	Alpha-2C adrenergic receptor	Known	6.0	---	---	---
QWCNQXNAFCBLLV-RCQSYPNMSA-N	FALCARINDIOL	P35372	Mu-type opioid receptor	Known	6.0	---	---	---
QWCNQXNAFCBLLV-KPJVXMDVSA-N	FALCARINDIOL	P35372	Mu-type opioid receptor	Known	6.0	---	---	---
PUAQLLVFLMYYJJ-ZETCQYMHSA-N	CHATININE	P18089	Alpha-2B adrenergic receptor	Known	6.0	---	---	---
QWCNQXNAFCBLLV-RCQSYPNMSA-N	FALCARINDIOL	P41143	Delta-type opioid receptor	Known	6.0	---	---	---
QWCNQXNAFCBLLV-YWALDVPYSA-N	FALCARINDIOL	P41143	Delta-type opioid receptor	Known	6.0	---	---	---
YXWQTVWJNHKSCC-MRXNPFEDSA-N	TETRAHYDROPAPAVERINE	P13945	Beta-3 adrenergic receptor	Known	6.0	---	---	---
YXWQTVWJNHKSCC-UHFFFAOYSA-N	TETRAHYDROPAPAVERINE	P13945	Beta-3 adrenergic receptor	Known	6.0	---	---	---
KZNIFHPLKGYRTM-UHFFFAOYSA-N	APIGENIN	P11511	Aromatase	Known	6.0	---	---	---
URFCJEUYXNAHFI-ZDUSSCGKSA-N	PINOCEMBRIN	P11511	Aromatase	Known	6.0	---	---	---
SFLSHLFXELFNJZ-QMMMGPOBSA-N	L-NORADRENALINE|L-NORADRENALIN|NOREPINEPHRINE	P21554	Cannabinoid receptor 1	Known	6.0	---	---	---
SFLSHLFXELFNJZ-UHFFFAOYSA-N	NOREPINEPHRINE	P21554	Cannabinoid receptor 1	Known	6.0	---	---	---
NISPVUDLMHQFRQ-MKIKIEMVSA-N	CUCURBITACIN-I	P20701	Integrin alpha-L	Known	6.0	---	---	---
WQGWDDDVZFFDIG-UHFFFAOYSA-N	PYROGALLOL	P06241	Tyrosine-protein kinase Fyn	Known	6.0	---	---	---
FTVWIRXFELQLPI-ZDUSSCGKSA-N	NARINGENIN	P11511	Aromatase	Known	6.0	---	---	---
YNNUSGIPVFPVBX-NHCUHLMSSA-N	CLEMATINE	P21728	D(1A) dopamine receptor	Known	6.0	---	---	---
PSFDQSOCUJVVGF-UHFFFAOYSA-N	HARMAN|HARMANE	P05177	Cytochrome P450 1A2	Known	6.0	---	---	---
CDRPUGZCRXZLFL-OWOJBTEDSA-N	PICEATANNOL	P52333	Tyrosine-protein kinase JAK3	Known	6.0	---	---	---
DRLFMBDRBRZALE-UHFFFAOYSA-N	MELATONIN	P22303	Acetylcholinesterase	Known	6.0	---	---	---
CDRPUGZCRXZLFL-OWOJBTEDSA-N	PICEATANNOL	P49841	Glycogen synthase kinase-3 beta	Known	6.0	---	---	---
AZQWKYJCGOJGHM-UHFFFAOYSA-N	1,4-BENZOQUINONE|QUINONE	P22303	Acetylcholinesterase	Known	6.0	---	---	---
LUKBXSAWLPMMSZ-OWOJBTEDSA-N	TRANS-RESVERATROL|RESVERATROL	O43570	Carbonic anhydrase 12	Known	6.0	---	---	---
DRLFMBDRBRZALE-UHFFFAOYSA-N	MELATONIN	P06276	Cholinesterase	Known	6.0	---	---	---
ATHGHQPFGPMSJY-UHFFFAOYSA-N	SPERMIDINE	P00918	Carbonic anhydrase 2	Known	6.0	---	---	---
QTBSBXVTEAMEQO-UHFFFAOYSA-N	ACETIC-ACID|DECAN-1-AL	P06239	Tyrosine-protein kinase Lck	Known	6.0	---	---	---
FMHHVULEAZTJMA-UHFFFAOYSA-N	4,8,5'-TRIMETHYLPSORALEN	P29274	Adenosine receptor A2a	Known	6.0	---	---	---
QUCQEUCGKKTEBI-UHFFFAOYSA-N	PALMATINE	P08684	Cytochrome P450 3A4	Known	6.0	---	---	---
FMHHVULEAZTJMA-UHFFFAOYSA-N	4,8,5'-TRIMETHYLPSORALEN	P05177	Cytochrome P450 1A2	Known	6.0	---	---	---
VCCRNZQBSJXYJD-UHFFFAOYSA-N	GALANGIN	P22303	Acetylcholinesterase	Known	6.0	---	---	---
XHEFDIBZLJXQHF-UHFFFAOYSA-N	FISETIN	P22303	Acetylcholinesterase	Known	6.0	---	---	---
HKOOXMFOFWEVGF-UHFFFAOYSA-N	PHENYLHYDRAZINE	P08684	Cytochrome P450 3A4	Known	6.0	---	---	---
CWVRJTMFETXNAD-BMNNCGMMSA-N	ISOCHLOROGENIC-ACID	P15121	Aldose reductase	Known	5.9	---	---	---
XDSSPSLGNGIIHP-VKHMYHEASA-N	SELENO-METHYL-SELENOCYSTEINE|SE-METHYLSELENOCYSTEINE	P08684	Cytochrome P450 3A4	Known	5.9	---	---	---
CWVRJTMFETXNAD-DUXPYHPUSA-N	ISOCHLOROGENIC-ACID|CHLOROGENIC-ACID	P15121	Aldose reductase	Known	5.9	---	---	---
CWVRJTMFETXNAD-VQWGVLBKSA-N	CHLOROGENIC-ACID	P15121	Aldose reductase	Known	5.9	---	---	---
AIFRHYZBTHREPW-UHFFFAOYSA-N	NORHARMAN	P27338	Amine oxidase [flavin-containing] B	Known	5.9	---	---	---
CWVRJTMFETXNAD-VRWXVSRJSA-N	CHLOROGENIC-ACID	P15121	Aldose reductase	Known	5.9	---	---	---
YUSWMAULDXZHPY-UHFFFAOYSA-N	AMENTOFLAVONE|BIAPIGENIN	P35462	D(3) dopamine receptor	Known	5.9	---	---	---
CWVRJTMFETXNAD-KJOPMHRFSA-N	5-O-CAFFEOYLQUINIC-ACID	P15121	Aldose reductase	Known	5.9	---	---	---
CWVRJTMFETXNAD-NXLLHMKUSA-N	NEO-CHLOROGENIC-ACID|NEOCLOROGENIC-ACID|NEOCHLOROGENIC-ACID	P15121	Aldose reductase	Known	5.9	---	---	---
XDSSPSLGNGIIHP-UHFFFAOYSA-N	SELENO-HOMOCYSTINE	P08684	Cytochrome P450 3A4	Known	5.9	---	---	---
MUMGGOZAMZWBJJ-DYKIIFRCSA-N	TESTOSTERONE	Q99720	Sigma non-opioid intracellular receptor 1	Known	5.9	---	---	---
MUMGGOZAMZWBJJ-KZYORJDKSA-N	EPITESTOSTERONE	Q99720	Sigma non-opioid intracellular receptor 1	Known	5.9	---	---	---
YNNUSGIPVFPVBX-NHCUHLMSSA-N	CLEMATINE	P08172	Muscarinic acetylcholine receptor M2	Known	5.9	---	---	---
YZXBAPSDXZZRGB-DOFZRALJSA-N	ARACHIDONIC-ACID	Q07869	Peroxisome proliferator-activated receptor alpha	Known	5.9	---	---	---
YZXBAPSDXZZRGB-CGRWFSSPSA-N	ARACHIDONIC-ACID	Q07869	Peroxisome proliferator-activated receptor alpha	Known	5.9	---	---	---
WJBMRZAHTUFBGE-UHFFFAOYSA-N	O-METHOXY-PHENYLETHYLAMINE	P34969	5-hydroxytryptamine receptor 7	Known	5.9	---	---	---
LODGIKWNLDQZBM-LBPRGKRZSA-N	BULBOCAPNINE	P14416	D(2) dopamine receptor	Known	5.9	---	---	---
FXNFHKRTJBSTCS-UHFFFAOYSA-N	BAICALEIN	P04798	Cytochrome P450 1A1	Known	5.9	---	---	---
LUKBXSAWLPMMSZ-UPHRSURJSA-N	RESVERATROL|CIS-RESVERATROL	P35354	Prostaglandin G/H synthase 2	Known	5.9	---	---	---
LUKBXSAWLPMMSZ-OWOJBTEDSA-N	TRANS-RESVERATROL|RESVERATROL	P35354	Prostaglandin G/H synthase 2	Known	5.9	---	---	---
SFLSHLFXELFNJZ-QMMMGPOBSA-N	L-NORADRENALINE|L-NORADRENALIN|NOREPINEPHRINE	P35368	Alpha-1B adrenergic receptor	Known	5.9	---	---	---
ZIIAJIWLQUVGHB-UHFFFAOYSA-N	CIRSIMARITIN|CIRSIMARITRIN	P30542	Adenosine receptor A1	Known	5.9	---	---	---
WJBMRZAHTUFBGE-UHFFFAOYSA-N	O-METHOXY-PHENYLETHYLAMINE	P28223	5-hydroxytryptamine receptor 2A	Known	5.9	---	---	---
WJBMRZAHTUFBGE-UHFFFAOYSA-N	O-METHOXY-PHENYLETHYLAMINE	P30939	5-hydroxytryptamine receptor 1F	Known	5.9	---	---	---
WJBMRZAHTUFBGE-UHFFFAOYSA-N	O-METHOXY-PHENYLETHYLAMINE	P28335	5-hydroxytryptamine receptor 2C	Known	5.9	---	---	---
WJBMRZAHTUFBGE-UHFFFAOYSA-N	O-METHOXY-PHENYLETHYLAMINE	P28221	5-hydroxytryptamine receptor 1D	Known	5.9	---	---	---
WJBMRZAHTUFBGE-UHFFFAOYSA-N	O-METHOXY-PHENYLETHYLAMINE	P47898	5-hydroxytryptamine receptor 5A	Known	5.9	---	---	---
WJBMRZAHTUFBGE-UHFFFAOYSA-N	O-METHOXY-PHENYLETHYLAMINE	Q13639	5-hydroxytryptamine receptor 4	Known	5.9	---	---	---
WJBMRZAHTUFBGE-UHFFFAOYSA-N	O-METHOXY-PHENYLETHYLAMINE	P50406	5-hydroxytryptamine receptor 6	Known	5.9	---	---	---
REFJWTPEDVJJIY-UHFFFAOYSA-N	QUERCETIN|QUERCETOL	Q965D5	Enoyl-acyl-carrier protein reductase	Known	5.9	---	---	---
WHUUTDBJXJRKMK-GSVOUGTGSA-N	GLUTAMIC-ACID	P39086	Glutamate receptor ionotropic, kainate 1	Known	5.9	---	---	---
WJBMRZAHTUFBGE-UHFFFAOYSA-N	O-METHOXY-PHENYLETHYLAMINE	P28222	5-hydroxytryptamine receptor 1B	Known	5.9	---	---	---
WJBMRZAHTUFBGE-UHFFFAOYSA-N	O-METHOXY-PHENYLETHYLAMINE	P41595	5-hydroxytryptamine receptor 2B	Known	5.9	---	---	---
REFJWTPEDVJJIY-UHFFFAOYSA-N	QUERCETIN|QUERCETOL	P68400	Casein kinase II subunit alpha	Known	5.9	---	---	---
SQFSKOYWJBQGKQ-UHFFFAOYSA-N	KAEMPFERIDE	P05177	Cytochrome P450 1A2	Known	5.9	---	---	---
DANYIYRPLHHOCZ-UHFFFAOYSA-N	APIGENIN-4'-METHYL-ETHER|ACACETIN	P11712	Cytochrome P450 2C9	Known	5.9	---	---	---
VYFYYTLLBUKUHU-UHFFFAOYSA-N	DOPAMINE	P23975	Sodium-dependent noradrenaline transporter	Known	5.9	---	---	---
WJBMRZAHTUFBGE-UHFFFAOYSA-N	O-METHOXY-PHENYLETHYLAMINE	P08908	5-hydroxytryptamine receptor 1A	Known	5.9	---	---	---
IZQSVPBOUDKVDZ-UHFFFAOYSA-N	ISORHAMNETIN|3-METHYLQUERCETIN	P05177	Cytochrome P450 1A2	Known	5.9	---	---	---
OYHQOLUKZRVURQ-AVQMFFATSA-N	OCTADECA-9,12-DIENOIC-ACID	Q5NUL3	Free fatty acid receptor 4	Known	5.9	---	---	---
OYHQOLUKZRVURQ-IXWMQOLASA-N	LINOLEIC-ACID	Q5NUL3	Free fatty acid receptor 4	Known	5.9	---	---	---
OYHQOLUKZRVURQ-HZJYTTRNSA-N	ALPHA-LINOLEIC-ACID|LINOLEIC-ACID	Q5NUL3	Free fatty acid receptor 4	Known	5.9	---	---	---
YXBUQQDFTYOHQI-UHFFFAOYSA-N	PSEUDOHYPERICIN	P21917	D(4) dopamine receptor	Known	5.9	---	---	---
WJBMRZAHTUFBGE-UHFFFAOYSA-N	O-METHOXY-PHENYLETHYLAMINE	P46098	5-hydroxytryptamine receptor 3A	Known	5.9	---	---	---
REFJWTPEDVJJIY-UHFFFAOYSA-N	QUERCETIN|QUERCETOL	P12931	Proto-oncogene tyrosine-protein kinase Src	Known	5.9	---	---	---
WHUUTDBJXJRKMK-UHFFFAOYSA-N	GLUTAMIC-ACID	P42261	Glutamate receptor 1	Known	5.9	---	---	---
VHBFFQKBGNRLFZ-UHFFFAOYSA-N	2-PHENYLCHROMONE	P09874	Poly [ADP-ribose] polymerase 1	Known	5.9	---	---	---
WQGWDDDVZFFDIG-UHFFFAOYSA-N	PYROGALLOL	P00533	Epidermal growth factor receptor	Known	5.9	---	---	---
QXKHYNVANLEOEG-UHFFFAOYSA-N	XANTHOTOXIN	P11509	Cytochrome P450 2A6	Known	5.9	---	---	---
JBFOLLJCGUCDQP-ZAJNMQHRSA-N	APIGENIN-7-O-GLUCURONIDE|APIGENIN-7-GLUCURONIDE	P15121	Aldose reductase	Known	5.9	---	---	---
RKUNBYITZUJHSG-QKPAOTATSA-N	HYOSCYAMINE	P35367	Histamine H1 receptor	Known	5.9	---	---	---
RKUNBYITZUJHSG-UHFFFAOYSA-N	ATROPINE|HYOSCYAMINE|L-HYOSCYAMINE	P35367	Histamine H1 receptor	Known	5.9	---	---	---
RKUNBYITZUJHSG-LGGPCSOHSA-N	ATROPINE|HYOSCYAMINE|L-HYOSCYAMINE	P35367	Histamine H1 receptor	Known	5.9	---	---	---
RKUNBYITZUJHSG-AUSYRVNMSA-N	ATROPINE|HYOSCYAMINE	P35367	Histamine H1 receptor	Known	5.9	---	---	---
RKUNBYITZUJHSG-VFSICIBPSA-N	ATROPINE|HYOSCYAMINE|L-HYOSCYAMINE	P35367	Histamine H1 receptor	Known	5.9	---	---	---
RKUNBYITZUJHSG-JJXSEGSLSA-N	ATROPINE	P35367	Histamine H1 receptor	Known	5.9	---	---	---
RKUNBYITZUJHSG-PJPHBNEVSA-N	ATROPINE|HYOSCYAMINE	P35367	Histamine H1 receptor	Known	5.9	---	---	---
VZTUIEROBZXUFA-UHFFFAOYSA-N	CANADINE	P33261	Cytochrome P450 2C19	Known	5.9	---	---	---
VZTUIEROBZXUFA-MRXNPFEDSA-N	CANADINE	P33261	Cytochrome P450 2C19	Known	5.9	---	---	---
VZTUIEROBZXUFA-INIZCTEOSA-N	CANADINE	P33261	Cytochrome P450 2C19	Known	5.9	---	---	---
SRPHMISUTWFFKJ-QJNWWGCFSA-N	CUCURBITACIN-D	P20701	Integrin alpha-L	Known	5.9	---	---	---
DNXHEGUUPJUMQT-CBZIJGRNSA-N	ESTRONE|OESTRONE	P05177	Cytochrome P450 1A2	Known	5.9	---	---	---
DANYIYRPLHHOCZ-UHFFFAOYSA-N	APIGENIN-4'-METHYL-ETHER|ACACETIN	P50750	Cyclin-dependent kinase 9	Known	5.9	---	---	---
KZNIFHPLKGYRTM-UHFFFAOYSA-N	APIGENIN	P22303	Acetylcholinesterase	Known	5.9	---	---	---
VEZXFTKZUMARDU-UHFFFAOYSA-N	GAMMA-MANGOSTIN	P49327	Fatty acid synthase	Known	5.9	---	---	---
LUKBXSAWLPMMSZ-UPHRSURJSA-N	RESVERATROL|CIS-RESVERATROL	P37231	Peroxisome proliferator-activated receptor gamma	Known	5.8	---	---	---
LUKBXSAWLPMMSZ-OWOJBTEDSA-N	TRANS-RESVERATROL|RESVERATROL	P37231	Peroxisome proliferator-activated receptor gamma	Known	5.8	---	---	---
BXNJHAXVSOCGBA-UHFFFAOYSA-N	HARMINE	P50406	5-hydroxytryptamine receptor 6	Known	5.8	---	---	---
JDLKFOPOAOFWQN-UHFFFAOYSA-N	ALLICIN	O75762	Transient receptor potential cation channel subfamily A member 1	Known	5.8	---	---	---
YBHILYKTIRIUTE-UHFFFAOYSA-N	BERBERINE	P11229	Muscarinic acetylcholine receptor M1	Known	5.8	---	---	---
YGWKXXYGDYYFJU-SSDOTTSWSA-N	MENTHOFURAN|(+)-MENTHOFURAN	P11509	Cytochrome P450 2A6	Known	5.8	---	---	---
HKOOXMFOFWEVGF-UHFFFAOYSA-N	PHENYLHYDRAZINE	P35354	Prostaglandin G/H synthase 2	Known	5.8	---	---	---
HKQZUYOVMYOFIT-JEJCSOMWSA-N	KARAKOLINE	P36544	Neuronal acetylcholine receptor subunit alpha-7	Known	5.8	---	---	---
YGWKXXYGDYYFJU-UHFFFAOYSA-N	MENTHOFURAN	P11509	Cytochrome P450 2A6	Known	5.8	---	---	---
JDLKFOPOAOFWQN-VIFPVBQESA-N	ALLICIN	O75762	Transient receptor potential cation channel subfamily A member 1	Known	5.8	---	---	---
FMHHVULEAZTJMA-UHFFFAOYSA-N	4,8,5'-TRIMETHYLPSORALEN	P28335	5-hydroxytryptamine receptor 2C	Known	5.8	---	---	---
HKOOXMFOFWEVGF-UHFFFAOYSA-N	PHENYLHYDRAZINE	P16050	Arachidonate 15-lipoxygenase	Known	5.8	---	---	---
SFLSHLFXELFNJZ-UHFFFAOYSA-N	NOREPINEPHRINE	P08913	Alpha-2A adrenergic receptor	Known	5.8	---	---	---
ZQSIJRDFPHDXIC-UHFFFAOYSA-N	DAIDZEIN|DAIDZEN	Q92731	Estrogen receptor beta	Known	5.8	---	---	---
SNICXCGAKADSCV-JTQLQIEISA-N	NICOTINE	P36544	Neuronal acetylcholine receptor subunit alpha-7	Known	5.8	---	---	---
RTIXKCRFFJGDFG-UHFFFAOYSA-N	CHRYSIN	P27338	Amine oxidase [flavin-containing] B	Known	5.8	---	---	---
RHMXXJGYXNZAPX-UHFFFAOYSA-N	RHEUM-EMODIN|EMODIN|FRANGULIC-ACID	P03372	Estrogen receptor	Known	5.8	---	---	---
HOBAELRKJCKHQD-YHTMAJSVSA-N	DELTA-8,11,14-EICOSATRIENIC-ACID	Q07869	Peroxisome proliferator-activated receptor alpha	Known	5.8	---	---	---
HOBAELRKJCKHQD-QNEBEIHSSA-N	DELTA-8,11,14-EICOSATRIENIC-ACID	Q07869	Peroxisome proliferator-activated receptor alpha	Known	5.8	---	---	---
RTIXKCRFFJGDFG-UHFFFAOYSA-N	CHRYSIN	P21397	Amine oxidase [flavin-containing] A	Known	5.8	---	---	---
AEMFNILZOJDQLW-QAGGRKNESA-N	ANDROSTENEDIONE	P08185	Corticosteroid-binding globulin	Known	5.8	---	---	---
JAZBEHYOTPTENJ-JLNKQSITSA-N	EICOSAPENTAENOIC-ACID	P37231	Peroxisome proliferator-activated receptor gamma	Known	5.8	---	---	---
YZXBAPSDXZZRGB-CGRWFSSPSA-N	ARACHIDONIC-ACID	P37231	Peroxisome proliferator-activated receptor gamma	Known	5.8	---	---	---
YZXBAPSDXZZRGB-DOFZRALJSA-N	ARACHIDONIC-ACID	P37231	Peroxisome proliferator-activated receptor gamma	Known	5.8	---	---	---
QHMBSVQNZZTUGM-QNSVNVJESA-N	CANNABIDIOL|CANNIBIDIOL	P21554	Cannabinoid receptor 1	Known	5.8	---	---	---
QHMBSVQNZZTUGM-ZENAZSQFSA-N	CANNABIDIOL|CANNIBIDIOL	P21554	Cannabinoid receptor 1	Known	5.8	---	---	---
QHMBSVQNZZTUGM-ROUUACIJSA-N	CANNABIDIOL	P21554	Cannabinoid receptor 1	Known	5.8	---	---	---
ZIIAJIWLQUVGHB-UHFFFAOYSA-N	CIRSIMARITIN|CIRSIMARITRIN	P15121	Aldose reductase	Known	5.8	---	---	---
AIFRHYZBTHREPW-UHFFFAOYSA-N	NORHARMAN	P47870	Gamma-aminobutyric acid receptor subunit beta-2	Known	5.8	---	---	---
RTIXKCRFFJGDFG-UHFFFAOYSA-N	CHRYSIN	P14867	Gamma-aminobutyric acid receptor subunit alpha-1	Known	5.8	---	---	---
AIFRHYZBTHREPW-UHFFFAOYSA-N	NORHARMAN	P14867	Gamma-aminobutyric acid receptor subunit alpha-1	Known	5.8	---	---	---
RTIXKCRFFJGDFG-UHFFFAOYSA-N	CHRYSIN	P18507	Gamma-aminobutyric acid receptor subunit gamma-2	Known	5.8	---	---	---
AIFRHYZBTHREPW-UHFFFAOYSA-N	NORHARMAN	P18507	Gamma-aminobutyric acid receptor subunit gamma-2	Known	5.8	---	---	---
RTIXKCRFFJGDFG-UHFFFAOYSA-N	CHRYSIN	P47870	Gamma-aminobutyric acid receptor subunit beta-2	Known	5.8	---	---	---
YUSWMAULDXZHPY-UHFFFAOYSA-N	AMENTOFLAVONE|BIAPIGENIN	P56817	Beta-secretase 1	Known	5.8	---	---	---
QXACEHWTBCFNSA-SFQUDFHCSA-N	CANNABIGEROL	P34972	Cannabinoid receptor 2	Known	5.8	---	---	---
IQPNAANSBPBGFQ-UHFFFAOYSA-N	LUTEOLIN|LUTEOLOL	P09917	Arachidonate 5-lipoxygenase	Known	5.8	---	---	---
IKMDFBPHZNJCSN-UHFFFAOYSA-N	MYRICETIN	P36888	Receptor-type tyrosine-protein kinase FLT3	Known	5.8	---	---	---
RHMXXJGYXNZAPX-UHFFFAOYSA-N	RHEUM-EMODIN|EMODIN|FRANGULIC-ACID	P68400	Casein kinase II subunit alpha	Known	5.8	---	---	---
TYUMAYSMJLPFAN-UHFFFAOYSA-N	SEQUOJAFLAVONE|SEQUOIAFLAVONE	P56817	Beta-secretase 1	Known	5.8	---	---	---
KWGRBVOPPLSCSI-WCBMZHEXSA-N	EPHEDRINE	P28223	5-hydroxytryptamine receptor 2A	Known	5.8	---	---	---
SECPZKHBENQXJG-FPLPWBNLSA-N	PALMITOLEIC-ACID|(Z)-PALMITOLEIC-ACID	Q07869	Peroxisome proliferator-activated receptor alpha	Known	5.8	---	---	---
SECPZKHBENQXJG-BQYQJAHWSA-N	PALMITOLEIC-ACID	Q07869	Peroxisome proliferator-activated receptor alpha	Known	5.8	---	---	---
WHUUTDBJXJRKMK-UHFFFAOYSA-N	GLUTAMIC-ACID	P39086	Glutamate receptor ionotropic, kainate 1	Known	5.8	---	---	---
SONNWYBIRXJNDC-VIFPVBQESA-N	SYNEPHRINE|SYNEPHERINE	P25100	Alpha-1D adrenergic receptor	Known	5.8	---	---	---
ZIIAJIWLQUVGHB-UHFFFAOYSA-N	CIRSIMARITIN|CIRSIMARITRIN	P0DMS8	Adenosine receptor A3	Known	5.8	---	---	---
JVXZRQGOGOXCEC-UHFFFAOYSA-N	SCUTELLAREIN	P04798	Cytochrome P450 1A1	Known	5.8	---	---	---
QXACEHWTBCFNSA-SFQUDFHCSA-N	CANNABIGEROL	P21554	Cannabinoid receptor 1	Known	5.8	---	---	---
TZBJGXHYKVUXJN-UHFFFAOYSA-N	1,3,7-TRIHYDROXYXANTHONE|GENISTEIN	P21397	Amine oxidase [flavin-containing] A	Known	5.8	---	---	---
VCCRNZQBSJXYJD-UHFFFAOYSA-N	GALANGIN	P47989	Xanthine dehydrogenase/oxidase	Known	5.8	---	---	---
KZNIFHPLKGYRTM-UHFFFAOYSA-N	APIGENIN	P49840	Glycogen synthase kinase-3 alpha	Known	5.8	---	---	---
KZNIFHPLKGYRTM-UHFFFAOYSA-N	APIGENIN	P47870	Gamma-aminobutyric acid receptor subunit beta-2	Known	5.8	---	---	---
KZNIFHPLKGYRTM-UHFFFAOYSA-N	APIGENIN	P21397	Amine oxidase [flavin-containing] A	Known	5.8	---	---	---
AUVVAXYIELKVAI-CKBKHPSWSA-N	EMETINE	P35368	Alpha-1B adrenergic receptor	Known	5.8	---	---	---
AUVVAXYIELKVAI-NKAAHPCGSA-N	EMETINE	P35368	Alpha-1B adrenergic receptor	Known	5.8	---	---	---
VYFYYTLLBUKUHU-UHFFFAOYSA-N	DOPAMINE	Q01959	Sodium-dependent dopamine transporter	Known	5.8	---	---	---
KZNIFHPLKGYRTM-UHFFFAOYSA-N	APIGENIN	P36888	Receptor-type tyrosine-protein kinase FLT3	Known	5.8	---	---	---
KZNIFHPLKGYRTM-UHFFFAOYSA-N	APIGENIN	P14867	Gamma-aminobutyric acid receptor subunit alpha-1	Known	5.8	---	---	---
KZNIFHPLKGYRTM-UHFFFAOYSA-N	APIGENIN	P18507	Gamma-aminobutyric acid receptor subunit gamma-2	Known	5.8	---	---	---
OIFVLHZEBAXHPM-UHFFFAOYSA-N	SOTETSUFLAVONE	P56817	Beta-secretase 1	Known	5.8	---	---	---
AVSXSVCZWQODGV-DPAQBDIFSA-N	DESMOSTEROL	P55055	Oxysterols receptor LXR-beta	Known	5.8	---	---	---
RTIXKCRFFJGDFG-UHFFFAOYSA-N	CHRYSIN	P11511	Aromatase	Known	5.8	---	---	---
QUCQEUCGKKTEBI-UHFFFAOYSA-N	PALMATINE	P22303	Acetylcholinesterase	Known	5.8	---	---	---
KZNIFHPLKGYRTM-UHFFFAOYSA-N	APIGENIN	Q00535	Cyclin-dependent-like kinase 5	Known	5.8	---	---	---
SFLSHLFXELFNJZ-UHFFFAOYSA-N	NOREPINEPHRINE	P21917	D(4) dopamine receptor	Known	5.8	---	---	---
SFLSHLFXELFNJZ-QMMMGPOBSA-N	L-NORADRENALINE|L-NORADRENALIN|NOREPINEPHRINE	P21917	D(4) dopamine receptor	Known	5.8	---	---	---
AFSDNFLWKVMVRB-UHFFFAOYSA-N	ELLAGIC-ACID	P22694	cAMP-dependent protein kinase catalytic subunit beta	Known	5.8	---	---	---
VZTUIEROBZXUFA-UHFFFAOYSA-N	CANADINE	P05177	Cytochrome P450 1A2	Known	5.8	---	---	---
AKNNEGZIBPJZJG-QZTJIDSGSA-N	NARCOTINE|NOSCAPINE	P33261	Cytochrome P450 2C19	Known	5.8	---	---	---
VZTUIEROBZXUFA-INIZCTEOSA-N	CANADINE	P05177	Cytochrome P450 1A2	Known	5.8	---	---	---
VZTUIEROBZXUFA-MRXNPFEDSA-N	CANADINE	P05177	Cytochrome P450 1A2	Known	5.8	---	---	---
IKGXIBQEEMLURG-JFNZIVIESA-N	RUTOSIDE|QUERCETIN-3-RHAMNOGLUCOSIDE|VIOLAQUERCITRIN|QUERCETIN-3-O-RUTINOSIDE	P18825	Alpha-2C adrenergic receptor	Known	5.8	---	---	---
IKGXIBQEEMLURG-BKUODXTLSA-N	RUTOSIDE	P18825	Alpha-2C adrenergic receptor	Known	5.8	---	---	---
IKGXIBQEEMLURG-BKUODXTLSA-N	RUTOSIDE	P08913	Alpha-2A adrenergic receptor	Known	5.8	---	---	---
IKGXIBQEEMLURG-JFNZIVIESA-N	RUTOSIDE|QUERCETIN-3-RHAMNOGLUCOSIDE|VIOLAQUERCITRIN|QUERCETIN-3-O-RUTINOSIDE	P08913	Alpha-2A adrenergic receptor	Known	5.8	---	---	---
CYQFCXCEBYINGO-DLBZAZTESA-N	DRONABINOL	O75762	Transient receptor potential cation channel subfamily A member 1	Known	5.8	---	---	---
CYQFCXCEBYINGO-IAGOWNOFSA-N	DELTA-1-TETRAHYDROCANNABINOL|TETRAHYDROCANNABINOL	O75762	Transient receptor potential cation channel subfamily A member 1	Known	5.8	---	---	---
CYQFCXCEBYINGO-UHFFFAOYSA-N	DELTA-9-TETRAHYDROCANNABINOL|TETRAHYDROCANNABINOL	O75762	Transient receptor potential cation channel subfamily A member 1	Known	5.8	---	---	---
CYQFCXCEBYINGO-IRXDYDNUSA-N	DELTA-1-TETRAHYDROCANNABINOL|TETRAHYDROCANNABINOL	O75762	Transient receptor potential cation channel subfamily A member 1	Known	5.8	---	---	---
OIPILFWXSMYKGL-UHFFFAOYSA-N	CHOLINE	P08912	Muscarinic acetylcholine receptor M5	Known	5.8	---	---	---
QAIPRVGONGVQAS-RQOWECAXSA-N	CIS-CAFFEIC-ACID	P00918	Carbonic anhydrase 2	Known	5.8	---	---	---
[truncated: 3,686 more rows]

## Sheet: Figure 2
Plant	Therapeutic_use
Ginkgo biloba	against arteriopathies
[truncated: 378 more rows]

## Sheet: Figure 4 - Analgesia
plant	uniprot	protein_name
[truncated: 280 more rows]

[truncated: 4 more sheets: Figure 4 - Hypercholesterolemia, Figure 4 - Diarrhea, Figure 4 - Catarrh, Figure 4 - Cough]
